# Supplementary material for: A large effective population size for established within-host influenza virus infection
Source: eLife. 2020 Aug 10;9:e56915. doi: 10.7554/eLife.56915 (PMC7431133; doi:10.7554/eLife.56915)
Supplement: Figure 1—figure supplement 2—source data 1. [file elife-56915-fig1-figsupp2-data1.xlsx]

## Sheet: Figure
	Year	Month	Day	Hour	Minute	ACCACAAAT	ACCACAAGT	ACCGCAAAT	ACCACAAAC	ACCATAAAC	ACCACAAGC	ACCACAAGA	ACCACAGAC	ACCACGAGC	ACCACAGGC	CCCACGTGC	CTTCTGTAC
	2017	7	29	0	0	0.700071	0	0	0.162712	0	0.0193958	0	0.103776	0	0.0016821	0	0
	2017	8	1	9	45	0.44961	0	0.00811725	0.383005	0	0.0246142	0	0.133077	0	0	0	0
	2017	8	3	13	50	0.71075	0	0	0.164298	0	0.0178418	0.0652587	0.0329648	0	0	0	0
	2017	8	7	10	30	0.63606	0	0	0.217029	0	0.00509553	0.0115339	0.128557	0	0	0.000314385	0
	2017	8	10	13	0	0.395516	0	0	0.273109	0	0	0.33066	0	0	0.000715378	0	0
	2017	8	14	15	10	0.282335	0	0.00221709	0.476723	0	0.0400834	0	0.182296	0	0.000819882	0	0
	2017	8	18	15	0	0.502812	0	0	0.210335	0	0.131919	0	0.147932	0	0	0	0
	2017	8	21	10	0	0.476528	0	0	0.359917	0	0.0100346	0	0.15352	0	0	0	0
	2017	8	24	10	27	0.700169	0	0	0.152036	0	0	0.098697	0.0490971	0	0	0	0
	2017	8	28	9	0	0.585837	0	0.0572201	0.147284	0	0.0625895	0.00322871	0.138207	0	0	0	0
	2017	8	31	12	0	0.455745	0	0	0.389184	0	0	0	0.155072	0	0	0	0
	2017	9	7	12	0	0.411129	0	0.00899562	0.113811	0	0.149464	0.010913	0.284846	0	0.0179577	0	0
	2017	9	11	9	30	0.454653	0	0	0.382198	0	0.000962516	0.00624061	0.147147	0	0	0	0
	2017	9	21	11	30	0.467991	0	0	0.400035	0	0	0.0995673	0.0315773	0	0	0	0
	2017	9	26	10	20	0.227201	0	0.0518206	0.209148	0	0	0	0.509343	0	0	0	0
	2017	9	28	13	30	0.533296	0	0.049747	0.171996	0	0.134326	0	0.110635	0	0	0	0
	2017	9	29	15	0	0.340935	0	0.5097	0.0633339	0	0.0772422	0	0.00617109	0	0	0	0
	2017	10	4	15	11	0	0	0	0	0	0.0301568	0	0	0	0	0.805272	0
	2017	10	5	10	35	0.675311	0	0	0.262396	0	0	0.0344894	0.0173868	0	0	0	0
	2017	10	11	10	40	0.119969	0	0	0.603096	0	0.149721	0	0.126251	0.000962743	0	0	0
	2017	10	19	1	25	0.23394	0	0	0.447684	0	0.104958	0.0161099	0.103044	0.042836	0	0	0
	2017	10	19	10	0	0.112412	0	0	0.0875403	0	0.77871	0.0143766	0.00611926	0	0	0	0
	2017	10	23	7	0	0.368404	0	0	0.398019	0	0.0365591	0.167335	0.0290123	0	0	0	0
	2017	10	30	12	30	0.126795	0	0	0.0578059	0	0.0740234	0.7404	0	0	0	0	0
	2017	11	2	9	30	0.0843647	0	0	0.2819	0	0.509994	0	0.123741	0	0	0	0
	2017	11	10	10	45	0.0585054	0	0.00286325	0.344988	0	0.450391	0	0.0856055	0	0	0	0
	2017	11	16	9	25	0.0915545	0	0	0.265451	0	0.106457	0.535405	0	0	0	0	0
	2017	11	20	9	15	0.770441	0	0	0.0385828	0	0	0.190976	0	0	0	0	0
	2017	11	23	10	55	0.369761	0	0	0.206671	0	0.126513	0	0.00395785	0	0.271619	0	0
	2017	11	27	8	30	0.222118	0	0	0.242741	0	0.38789	0.0871037	0.0508941	0	0.00201719	0	0
	2017	11	30	11	42	0.486426	0.513574	0	0	0	0	0	0	0	0	0	0
	2017	12	4	9	16	0.471801	0	0	0.381804	0	0.0618908	0.0435915	0.0312893	0	0.00962358	0	0
	2017	12	7	9	30	0.273625	0	0	0.00120674	0	0.627122	0.096489	0	0	0	0	0
	2017	12	11	9	0	0.227461	0	0	0.249081	0	0.510811	0	0.0111615	0	0	0	0
	2017	12	25	12	17	0	0	0	0.17333	0	0.7773	0.0483959	0	0	0.00097377	0	0
	2018	1	2	9	0	0.118101	0	0	0.555106	0	0.00125586	0.324501	0	0	0	0	0
	2018	1	8	9	15	0.374081	0	0	0.0493574	0.117281	0.366435	0.0928451	0	0	0	0	0
	2018	1	11	10	0	0.00512218	0	0.000873897	0.012099	0	0	0	0.981905	0	0	0	0
	2018	2	22	9	30	0	0	0	0	0	0	0	0	1	0	0	0
	2018	3	27	16	15	0	0	0	0	0	0	0	0	0	0	0	1
	2018	4	1	11	30	0	0	0	0	0	0	0	0	0	0	0	1
