# Supplementary material for: A large effective population size for established within-host influenza virus infection
Source: eLife. 2020 Aug 10;9:e56915. doi: 10.7554/eLife.56915 (PMC7431133; doi:10.7554/eLife.56915)
Supplement: Figure 1—source data 1. — (A) CT values and dates of treatment. (C) Reconstructed haplotype frequencies for the neuraminidase viral segment. [file elife-56915-fig1-data1.xlsx]

## Sheet: Figure A
		Day
			Date	CT score
		0	2017-07-29	26
		3	2017-08-01	26		Oseltamivir
		5	2017-08-03	24		2017-08-01	2017-08-06
		9	2017-08-07	27		2017-12-25	2017-12-28
		12	2017-08-10	25		2018-03-31	2018-04-02
		16	2017-08-14	19
		20	2017-08-18	26		Zanamivir
		23	2017-08-21	22		2017-10-14	2017-11-15
		26	2017-08-24	23		2017-12-08	2017-12-25
		30	2017-08-28	23		2017-12-28	2018-01-24
		33	2017-08-31	23		2018-04-01	2018-04-19
		40	2017-09-07	23
		44	2017-09-11	21		Nitazoxanide
		54	2017-09-21	23		2017-12-12	2018-02-15
		59	2017-09-26	21
		61	2017-09-28	23		Favipiravir
		62	2017-09-29	32		2018-01-06	2018-01-24
		65	2017-10-02	25		2018-03-30	2018-04-19
		67	2017-10-04	21
		68	2017-10-05	23		Bone Marrow Transplant
		74	2017-10-11	24		2018-01-04
		82	2017-10-19	25
		82	2017-10-19	22
		86	2017-10-23	26
		93	2017-10-30	25
		96	2017-11-02	28
		104	2017-11-10	25
		110	2017-11-16	25
		114	2017-11-20	24
		117	2017-11-23	25
		121	2017-11-27	27
		124	2017-11-30	32
		128	2017-12-04	23
		131	2017-12-07	24
		135	2017-12-11	23
		138	2017-12-14	33
		145	2017-12-21	28
		146	2017-12-22	22
		149	2017-12-25	23
		157	2018-01-02	26
		163	2018-01-08	28
		166	2018-01-11	27
		208	2018-02-22	36
		241	2018-03-27	27
		246	2018-04-01	31

## Sheet: Figure C
		Year	Month	Day	Hour	Minute	CTTAAACTAGAAGT	CTTAAACTAGAAAT	ATTAAACTAGAAGT	CTTCAACTAGAAGT	CTTGAACTAGAAGT	CTTAAACTAGAAGC	CTTAAACTAAAAGT	ATTAAACTAGAAAT	CTTCAACTAGAAAT	TTTAAACTAGAAAT	AAAAAACTAGAAGT	ATTGAACTACAAGT	CTTAAGCTAGGGAT	CTTAAGCTGGGGAC	CTCAAGCTGGGGAC	TACCCGTCAGAAGT	TTCAAGCTGAGGAC	TGCCCACCGAGGAC	TGCAGGTCGAGGAC	TAACCGTCGAGGAC	TGCCCGTCGAGGAC
		2017	7	29	0	0	0.806247	0	0	0	0	0	0.102361	0	0	0	0	0	0	0	0	0	0	0	0	0	0
		2017	8	1	9	45	0.606429	0.281629	0	0	0	0	0.00293551	0	0	0	0	0	0	0	0	0	0	0	0	0	0
		2017	8	3	13	50	0.758377	0.0781067	0	0	0	0	0	0.106279	0	0	0	0	0	0	0	0	0	0	0	0	0
		2017	8	7	10	30	0.952252	0.0152746	0	0	0	0	0	0	0	0	0	0	0	0	0	0	0	0	0	0	0
		2017	8	10	13	0	0.59302	0.326033	0	0	0.0372885	0	0.0394153	0	0	0	0	0	0	0	0	0	0	0	0	0	0
		2017	8	14	15	10	0.789046	0.0562449	0	0	0	0	0.0893685	0.0106482	0	0	0	0	0	0	0	0	0	0	0	0	0
		2017	8	18	15	0	0.828355	0.0102755	0	0	0	0.00590862	0.00375464	0.0314187	0	0.0839223	0	0	0	0	0	0	0	0	0	0	0
		2017	8	21	10	0	0.769818	0.217724	0	0	0	0	0.00905933	0	0	0	0	0	0	0	0	0	0	0	0	0	0
		2017	8	24	10	27	0.949581	0.0448019	0	0	0	0	0.000321996	0	0	0	0	0	0	0	0	0	0	0	0	0	0
		2017	8	28	9	0	0.673934	0.0369988	0.0485731	0	0	0.0157945	0.0561748	0.00596365	0	0	0	0	0	0	0	0	0	0	0	0	0
		2017	8	31	12	0	0.784623	0.127118	0	0	0	0.0539776	0	0	0	0.00544289	0	0	0	0	0	0	0	0	0	0	0
		2017	9	7	12	0	0.826072	0.00188885	0	0	0	0	0.019024	0.000835143	0	0	0	0	0	0	0	0	0	0	0	0	0
		2017	9	11	9	30	0.921179	0	0	0	0	0	0.0285407	0	0	0	0	0	0	0	0	0	0	0	0	0	0
		2017	9	21	11	30	0.968453	0.00426243	0	0	0	0	0	0	0	0	0	0	0	0	0	0	0	0	0	0	0
		2017	9	26	10	20	0.661102	0.00171587	0	0	0	0.0399279	0.231267	0	0	9.09996e-05	0	0	0	0	0	0	0	0	0	0	0
		2017	9	28	13	30	0.659143	0.120316	0	0	0	0	0.146808	0.0283596	0	0	0	0	0	0	0	0	0	0	0	0	0
		2017	9	29	15	0	0.196066	0.022006	0	0	0	0	0.357005	0.272719	0	0	0	0	0	0	0	0	0	0	0	0	0
		2017	10	4	15	11	0	0	0	0	0	0	0	0	0	0	0	0	0.292763	0.155022	0.117292	0	0.165513	0	0	0	0
		2017	10	5	10	35	0.905509	0.006922	0	0	0	0	0.0344678	0	0	0	0	0	0	0	0	0	0	0	0	0	0
		2017	10	11	10	40	0.626997	0.199811	0	0	0	0	0.000518938	0	0	0.120133	0	0	0	0	0	0	0	0	0	0	0
		2017	10	19	1	25	0.666672	0.198333	0	0	0	7.08069e-05	0	0.051309	0	0.0652505	0	0	0	0	0	0	0	0	0	0	0
		2017	10	19	10	0	0.438802	0.545102	0	0	0	0	0.0141318	0	0	0	0	0	0	0	0	0	0	0	0	0	0
		2017	10	23	7	0	0.583005	0.352993	0	0	0	0	0	0	0	0	0	0	0	0	0	0	0	0	0	0	0
		2017	10	30	12	30	0.487979	0.0308085	0.000335931	0	0.325386	0	0.0130953	0	0	0	0	0	0	0	0	0	0	0	0	0	0
		2017	11	2	9	30	0.379445	0.576827	0	0	0	0	0	0	0	0	0	0	0	0	0	0	0	0	0	0	0
		2017	11	10	10	45	0.0350601	0.893766	0	0	0	0.0268906	0.00482374	0	0	0	0	0	0	0	0	0	0	0	0	0	0
		2017	11	16	9	25	0.182155	0.336454	0.0725042	0	0.0895827	0.0300588	0	0	0	0	0	0	0	0	0	0	0	0	0	0	0
		2017	11	20	9	15	0.855515	0	0	0	0.0802761	0	0	0	0	0	0	0	0	0	0	0	0	0	0	0	0
		2017	11	23	10	55	0.693812	0	0	0.244913	0	0	0.00905172	0	0	0	0	0	0	0	0	0	0	0	0	0	0
		2017	11	27	8	30	0.490079	0.455275	0	0	0	0	0	0	0	0	0	0	0	0	0	0	0	0	0	0	0
		2017	11	30	11	42	0.114168	0	0.549445	0	0	0	0	0	0	0	0.123124	0	0	0	0	0	0	0	0	0	0
		2017	12	4	9	16	0.442446	0.240204	0.00487355	0.0583191	0	0	0.118162	0	0.000772971	0	0	0	0	0	0	0	0	0	0	0	0
		2017	12	7	9	30	0.122322	0.210107	0.205817	0.00198537	0	0.13594	0.0165748	0	0.283603	0.00570473	0	0	0	0	0	0	0	0	0	0	0
		2017	12	11	9	0	0.529367	0.000990486	0	0.0996615	0	0	0.266293	0.00473993	0.00717094	0	0	0	0	0	0	0	0	0	0	0	0
		2017	12	25	12	17	0.117599	0.6639	0.0112528	0	0	0	0.0164764	0	0	0	0	0	0	0	0	0	0	0	0	0	0
		2018	1	2	9	0	0.763504	0.228503	0	0	0.000270814	0	0	0	0	0	0	0	0	0	0	0	0	0	0	0	0
		2018	1	8	9	15	0.261779	0.0392919	0	0.248615	0.0453533	0	0.340972	0	0.0453215	0	0	0	0	0	0	0	0	0	0	0	0
		2018	1	11	10	0	0	0.995509	0	0	0	0	0.000258094	0	0	0	0	0	0	0	0	0	0	0	0	0	0
		2018	2	22	9	30	0	0	0	0.141105	0.162884	0	0	0	0	0	0	0.148476	0	0	0	0	0	0	0	0	0
		2018	3	27	16	15	0	0	0	0	0	0	0	0	0	0	0	0	0	0	0	0	0	0.113166	0.297101	0.117329	0.359117
		2018	4	1	11	30	0	0	0	0	0	0	0	0	0	0	0	0	0	0	0	0.112998	0	0	0.184413	0	0.520961
		Note: In this figure only haplotypes inferred to reach a frequency of at least 10% in at least one time point were plotted.
