# Supplementary material for: A large effective population size for established within-host influenza virus infection
Source: eLife. 2020 Aug 10;9:e56915. doi: 10.7554/eLife.56915 (PMC7431133; doi:10.7554/eLife.56915)
Supplement: Figure 1—source data 2. [file elife-56915-fig1-data2.new]

#NEXUS

Begin taxa;
	Dimensions ntax=17;
		Taxlabels
			B/Venezuela/02/2016
			Sample_01_Apr_18
			Sample_02_Jan_18
			Sample_02_Nov_17
			Sample_04_Oct_17
			Sample_08_Jan_18
			Sample_10_Nov_17
			Sample_11_Jan_18
			Sample_20_Nov_17
			Sample_22_Feb_18
			Sample_23_Oct_17
			Sample_25_Dec_17
			Sample_27_Mar_18
			Sample_28_Sep_17
			Sample_29_Jul_17
			Sample_30_Nov_17
			Sample_30_Oct_17
			;
End;
Begin trees;
	Translate
		   1 B/Venezuela/02/2016,
		   2 Sample_01_Apr_18,
		   3 Sample_02_Jan_18,
		   4 Sample_02_Nov_17,
		   5 Sample_04_Oct_17,
		   6 Sample_08_Jan_18,
		   7 Sample_10_Nov_17,
		   8 Sample_11_Jan_18,
		   9 Sample_20_Nov_17,
		  10 Sample_22_Feb_18,
		  11 Sample_23_Oct_17,
		  12 Sample_25_Dec_17,
		  13 Sample_27_Mar_18,
		  14 Sample_28_Sep_17,
		  15 Sample_29_Jul_17,
		  16 Sample_30_Nov_17,
		  17 Sample_30_Oct_17
;
tree TREE1 = (1[&height=3.6555235563370836E-19,height_95%_HPD={0.0,8.673617379884035E-19},height_median=0.0,height_range={0.0,1.734723475976807E-18},length=0.004319379736093486,length_95%_HPD={0.003644387298603,0.004995311776562831},length_median=0.004306208429379888,length_range={0.003128214473657437,0.005903379229185694}]:0.004319379736093486,(((2[&height=3.690695985441157E-19,height_95%_HPD={0.0,8.673617379884035E-19},height_median=0.0,height_range={0.0,2.6020852139652106E-18},length=3.7628742800994205E-4,length_95%_HPD={2.1572561983833945E-4,5.551276260427123E-4},length_median=3.678213655981307E-4,length_range={1.4540335709192255E-4,8.03570368365268E-4}]:3.762874280099419E-4,13[&height=3.690695985441157E-19,height_95%_HPD={0.0,8.673617379884035E-19},height_median=0.0,height_range={0.0,2.6020852139652106E-18},length=3.7628742800994205E-4,length_95%_HPD={2.1572561983833945E-4,5.551276260427123E-4},length_median=3.678213655981307E-4,length_range={1.4540335709192255E-4,8.03570368365268E-4}]:3.762874280099419E-4)[&CAheight_95%_HPD={0.0,5.283957364193726E-4},CAheight_mean=3.386624477069783E-4,CAheight_median=3.556465269286581E-4,CAheight_range={0.0,8.035703683652688E-4},height=3.7628742800994226E-4,height_95%_HPD={2.1572561983833945E-4,5.551276260427132E-4},height_median=3.678213655981307E-4,height_range={1.4540335709192255E-4,8.035703683652688E-4},length=0.0012116784733987502,length_95%_HPD={8.908593422505308E-4,0.0015649980014332031},length_median=0.0012081996245397863,length_range={6.037521732180397E-4,0.0020201639702842537},posterior=1.0]:0.0012116784733987552,5[&height=3.652150857655871E-19,height_95%_HPD={0.0,8.673617379884035E-19},height_median=0.0,height_range={0.0,1.734723475976807E-18},length=0.001587965901408696,length_95%_HPD={0.0012350450437854815,0.0019397167627335527},length_median=0.0015843756605342582,length_range={9.062376166440603E-4,0.0022774491682009857}]:0.001587965901408697)[&CAheight_95%_HPD={0.0,0.0018896073293186415},CAheight_mean=0.0014291851893390346,CAheight_median=0.0015590550634825527,CAheight_range={0.0,0.0022774491682009865},height=0.0015879659014086975,height_95%_HPD={0.0012350450437854815,0.0019397167627335536},height_median=0.001584375660534259,height_range={9.062376166440603E-4,0.0022774491682009865},length=9.403428776770046E-4,length_95%_HPD={5.953499812111586E-4,0.001319381450081297},length_median=9.314959673286886E-4,length_range={3.7500679477752265E-4,0.001699325548216138},posterior=1.0]:9.417985363616437E-4,((((((3[&height=3.5369972883973285E-19,height_95%_HPD={0.0,8.673617379884035E-19},height_median=0.0,height_range={0.0,1.734723475976807E-18},length=1.8191878629476342E-4,length_95%_HPD={2.8497094004650142E-5,3.805777762695521E-4},length_median=1.654243149834915E-4,length_range={5.982055988428166E-6,6.421196349887396E-4}]:1.8843831649687252E-4,11[&height=3.5504880831221786E-19,height_95%_HPD={0.0,8.673617379884035E-19},height_median=0.0,height_range={0.0,1.734723475976807E-18},length=1.8611971910717132E-4,length_95%_HPD={2.8497094004650142E-5,3.8626030422806703E-4},length_median=1.694870935915506E-4,length_range={5.982055988428166E-6,6.641157058344515E-4}]:1.8843831649687252E-4)[&CAheight_95%_HPD={0.0,3.745908624337539E-4},CAheight_mean=1.6959636904193107E-4,CAheight_median=1.5794031284064453E-4,CAheight_range={0.0,7.357011759958503E-4},height=1.7489199531964492E-4,height_95%_HPD={2.8497094004650142E-5,3.5872075304095976E-4},height_median=1.603163072533371E-4,height_range={5.982055988428166E-6,5.660537775026443E-4},length=2.3234316576431298E-4,length_95%_HPD={2.7038244039805787E-7,4.417193435545053E-4},length_median=2.2992303923255984E-4,length_range={2.977148387192652E-9,7.387277217266027E-4},posterior=0.859126763692923]:2.6334760936230414E-4,(6[&height=3.6497417871692906E-19,height_95%_HPD={0.0,8.673617379884035E-19},height_median=0.0,height_range={0.0,2.6020852139652106E-18},length=3.2588659914773273E-4,length_95%_HPD={1.4703018439380777E-4,5.044252292942773E-4},length_median=3.239537120977398E-4,length_range={5.5713543318989395E-5,8.036386499601202E-4}]:3.8049688731427834E-4,(((9[&height=3.6309510373739637E-19,height_95%_HPD={0.0,8.673617379884035E-19},height_median=0.0,height_range={0.0,2.6020852139652106E-18},length=2.126683378261649E-4,length_95%_HPD={9.284115001454134E-5,3.5499339046046654E-4},length_median=2.0261137018307354E-4,length_range={5.703028745066875E-5,5.681859717855697E-4}]:2.1266833782616491E-4,17[&height=3.6309510373739637E-19,height_95%_HPD={0.0,8.673617379884035E-19},height_median=0.0,height_range={0.0,2.6020852139652106E-18},length=2.126683378261649E-4,length_95%_HPD={9.284115001454134E-5,3.5499339046046654E-4},length_median=2.0261137018307354E-4,length_range={5.703028745066875E-5,5.681859717855697E-4}]:2.1266833782616491E-4)[&CAheight_95%_HPD={0.0,3.391565580013918E-4},CAheight_mean=1.9140363051427993E-4,CAheight_median=1.9335965448215742E-4,CAheight_range={0.0,5.681859717855705E-4},height=2.1266833782616527E-4,height_95%_HPD={9.284115001454134E-5,3.549933904604674E-4},height_median=2.026113701830744E-4,height_range={5.703028745066875E-5,5.681859717855705E-4},length=9.653024939401213E-5,length_95%_HPD={1.2796618547247958E-5,2.090032058044448E-4},length_median=8.395328692260276E-5,length_range={6.2893046575626665E-6,5.763816731035789E-4},posterior=1.0]:9.78581327834337E-5,15[&height=3.633360107860544E-19,height_95%_HPD={0.0,8.673617379884035E-19},height_median=0.0,height_range={0.0,2.6020852139652106E-18},length=2.155711947910209E-4,length_95%_HPD={5.6098070996719006E-5,3.634142461620077E-4},length_median=2.171673682464766E-4,length_range={6.1668237231141815E-6,5.463659083591549E-4}]:3.105264706095986E-4)[&CAheight_95%_HPD={0.0,4.911569488800895E-4},CAheight_mean=2.794769285028497E-4,CAheight_median=2.8075438147347285E-4,CAheight_range={0.0,9.926095583074014E-4},height=2.550739469740908E-4,height_95%_HPD={1.3625591510774138E-4,3.690823037851036E-4},height_median=2.499118763180559E-4,height_range={9.323945367929222E-5,5.463659083591549E-4},length=4.669690177574208E-5,length_95%_HPD={1.4974763186108991E-6,1.1192887161933212E-4},length_median=3.833283497941208E-5,length_range={7.079303690378513E-7,4.96194551272598E-4},posterior=0.570603266303744]:2.701335459299759E-5,14[&height=3.679132447105571E-19,height_95%_HPD={0.0,8.673617379884035E-19},height_median=0.0,height_range={0.0,2.6020852139652106E-18},length=2.328304402161072E-4,length_95%_HPD={5.2634856582906356E-5,3.968908509064334E-4},length_median=2.3656243091463563E-4,length_range={6.1668237231141815E-6,6.102859017755187E-4}]:3.375398252025962E-4)[&CAheight_95%_HPD={0.0,5.002089609951743E-4},CAheight_mean=3.037892177430829E-4,CAheight_median=3.1347409282362227E-4,CAheight_range={0.0,9.926095583074014E-4},height=2.982971583866617E-4,height_95%_HPD={1.782825639110022E-4,4.2731046717882706E-4},height_median=2.9371294663109275E-4,height_range={1.1463965780736645E-4,6.102859017755187E-4},length=6.582214998849774E-5,length_95%_HPD={3.257111032170003E-6,1.5714069436529535E-4},length_median=5.549274350273754E-5,length_range={3.18503425533051E-7,3.5574625401232777E-4},posterior=0.6347072547494723]:4.295706211168216E-5)[&CAheight_95%_HPD={0.0,5.333440672381571E-4},CAheight_mean=3.4245100317126514E-4,CAheight_median=3.588352394683198E-4,CAheight_range={0.0,9.926095583074014E-4},height=3.6557076424786563E-4,height_95%_HPD={2.1915824616930684E-4,5.146971866671424E-4},height_median=3.586342261135476E-4,height_range={1.615248273563615E-4,7.133037667203671E-4},length=8.104449781956059E-5,length_95%_HPD={2.8354817837540278E-6,1.8454493726393576E-4},length_median=7.041901885542238E-5,length_range={2.3876078501881143E-8,4.5395043082914867E-4},posterior=0.8621264303966226]:7.128903854489833E-5)[&CAheight_95%_HPD={0.0,6.079093232358619E-4},CAheight_mean=4.0661185068077715E-4,CAheight_median=4.319668162160971E-4,CAheight_range={0.0,9.926095583074014E-4},height=4.372661171448008E-4,height_95%_HPD={2.790664637137099E-4,5.959330320230282E-4},height_median=4.3159386273943596E-4,height_range={1.9802912122204776E-4,8.01646553861269E-4},length=1.0257387795550652E-4,length_95%_HPD={3.2732765649148843E-6,2.3725102548414123E-4},length_median=8.749249224018546E-5,length_range={5.806007843554492E-7,5.40872447416537E-4},posterior=0.7663592934118432]:7.870542990617374E-5,12[&height=3.596260422367206E-19,height_95%_HPD={0.0,8.673617379884035E-19},height_median=0.0,height_range={0.0,1.734723475976807E-18},length=4.6139512347856756E-4,length_95%_HPD={7.922019671289734E-5,7.216373512679377E-4},length_median=4.941034327994691E-4,length_range={2.3021167608057013E-5,0.0011340888232640716}]:5.304913557653505E-4)[&CAheight_95%_HPD={0.0,7.073962675804481E-4},CAheight_mean=4.774475245719351E-4,CAheight_median=5.085442443398744E-4,CAheight_range={0.0,0.001134088823264072},height=5.303189461153609E-4,height_95%_HPD={3.398546905626172E-4,7.388316457417939E-4},height_median=5.224843179731371E-4,height_range={2.3987313308853524E-4,0.001134088823264072},length=3.1134639382213137E-4,length_95%_HPD={4.780247595555145E-5,6.52562019721008E-4},length_median=2.8298319589758407E-4,length_range={5.305975868176351E-6,0.0013671090400996415},posterior=0.9981113209643373]:4.418038455201599E-4,(7[&height=3.590478653199413E-19,height_95%_HPD={0.0,8.673617379884035E-19},height_median=0.0,height_range={0.0,2.6020852139652106E-18},length=7.590497363888303E-4,length_95%_HPD={4.6480748871861747E-4,0.0010956577571426991},length_median=7.446034884265587E-4,length_range={2.120901070631195E-4,0.0016067732915313283}]:7.676496766202543E-4,8[&height=3.596742236464522E-19,height_95%_HPD={0.0,8.673617379884035E-19},height_median=0.0,height_range={0.0,2.6020852139652106E-18},length=7.658386893788674E-4,length_95%_HPD={4.6509478433204516E-4,0.0010949761329306206},length_median=7.486860720085976E-4,length_range={3.3233633838152237E-4,0.001997416228834875}]:7.676496766202543E-4)[&CAheight_95%_HPD={0.0,0.00105883193382762},CAheight_mean=6.908923846874225E-4,CAheight_median=7.27065332158057E-4,CAheight_range={0.0,0.002191704132418555},height=7.615177723313974E-4,height_95%_HPD={4.648074887186179E-4,0.0010816744755406632},height_median=7.464367198740632E-4,height_range={3.3233633838152324E-4,0.0016067732915313283},length=1.995294349598192E-4,length_95%_HPD={2.0095456786134013E-5,4.276583111663362E-4},length_median=1.7753987429351822E-4,length_range={6.411341153139162E-7,8.770528505997275E-4},posterior=0.9810021108765693]:2.0464552466525605E-4)[&CAheight_95%_HPD={0.0,0.0013294679365476528},CAheight_mean=8.750754031367744E-4,CAheight_median=9.197291468943259E-4,CAheight_range={0.0,0.002191704132418555},height=9.023883023996212E-4,height_95%_HPD={5.818499817032844E-4,0.0013200687318496796},height_median=8.727859943044526E-4,height_range={4.486276012354495E-4,0.0018973712030907813},length=4.149761757422659E-4,length_95%_HPD={1.8697797487306905E-7,0.0011387568380190937},length_median=2.631846156424271E-4,length_range={1.8697797487306905E-7,0.001638087054841295},posterior=0.4897233640706588]:2.0324437481446603E-4,4[&height=3.645887274390762E-19,height_95%_HPD={0.0,8.673617379884035E-19},height_median=0.0,height_range={0.0,1.734723475976807E-18},length=0.001004253176946776,length_95%_HPD={5.108215860423291E-4,0.0019049069045967027},length_median=8.904610564492766E-4,length_range={2.120901070631195E-4,0.002512503108173534}]:0.0011755395760999763)[&CAheight_95%_HPD={0.0,0.002009269853824343},CAheight_mean=0.001057997372710318,CAheight_median=0.0010256644568189125,CAheight_range={0.0,0.0027401682441689627},height=0.0010283294037872336,height_95%_HPD={7.045611343026678E-4,0.0014117310553631085},height_median=0.0010103613462456632,height_range={5.095498054646062E-4,0.0018886600525548718},length=0.0012893363281593034,length_95%_HPD={7.423764489848236E-4,0.0018151928973270007},length_median=0.001295641944182203,length_range={6.782504687172577E-5,0.0022571815145922165},posterior=0.8377958004666148]:0.0010813983996214693,(10[&height=3.656487184531716E-19,height_95%_HPD={0.0,8.673617379884035E-19},height_median=0.0,height_range={0.0,1.734723475976807E-18},length=0.0019384655738343157,length_95%_HPD={0.0014167518325381556,0.0023900554645060546},length_median=0.001957572839525938,length_range={0.001106166403328094,0.00281356201528081}]:0.0019384655738343152,16[&height=3.656487184531716E-19,height_95%_HPD={0.0,8.673617379884035E-19},height_median=0.0,height_range={0.0,1.734723475976807E-18},length=0.0019384655738343157,length_95%_HPD={0.0014167518325381556,0.0023900554645060546},length_median=0.001957572839525938,length_range={0.001106166403328094,0.00281356201528081}]:0.0019384655738343152)[&CAheight_95%_HPD={0.0,0.0023113462394857673},CAheight_mean=0.0017446383991683507,CAheight_median=0.0019228167263180673,CAheight_range={0.0,0.002813562015280811},height=0.0019384655738343157,height_95%_HPD={0.0014167518325381564,0.0023900554645060555},height_median=0.0019575728395259387,height_range={0.001106166403328094,0.002813562015280811},length=2.903923210669352E-4,length_95%_HPD={7.982545208142606E-5,5.276289197695292E-4},length_median=2.75726957152242E-4,length_range={2.0754372707723623E-5,9.460590555487535E-4},posterior=1.0]:3.1847240188713033E-4)[&CAheight_95%_HPD={0.0,0.0026384151691459163},CAheight_mean=0.0020312667452723463,CAheight_median=0.0022359132275737575,CAheight_range={0.0,0.0032663273960841467},height=0.0022524698376597562,height_95%_HPD={0.0017533734371568076,0.002731303688431932},height_median=0.002267531187815015,height_range={0.001326510180173635,0.003044740802121564},length=2.779211164443151E-4,length_95%_HPD={1.3084371944964857E-5,6.275502951897938E-4},length_median=2.4162098916598708E-4,length_range={1.0340216037088568E-6,0.0012054167651292243},posterior=0.9816687034773914]:2.728264620488951E-4)[&CAheight_95%_HPD={0.0,0.0028945826933423225},CAheight_mean=0.0022768132891081735,CAheight_median=0.0024959169568894183,CAheight_range={0.0,0.0035490387213200896},height=0.002529764437770341,height_95%_HPD={0.0020875583509884685,0.00299463721343252},height_median=0.0025270540501738615,height_range={0.0017468839300388865,0.0035490387213200896},length=0.001789615298323164,length_95%_HPD={0.0011530661284082614,0.00249251736185643},length_median=0.0017749042824259514,length_range={5.675194163078157E-4,0.0031930509323011614},posterior=1.0]:0.0017896152983231444)[&CAheight_95%_HPD={0.0,0.004884249710994326},CAheight_mean=0.0038874849519625505,CAheight_median=0.004257903337437138,CAheight_range={0.0,0.005903379229185695},height=0.004319379736093486,height_95%_HPD={0.003644387298603,0.004995311776562832},height_median=0.004306208429379889,height_range={0.003128214473657437,0.005903379229185695},length=0.0,posterior=1.0]:0.0;
End;
