# Supplementary material for: A large effective population size for established within-host influenza virus infection
Source: eLife. 2020 Aug 10;9:e56915. doi: 10.7554/eLife.56915 (PMC7431133; doi:10.7554/eLife.56915)
Supplement: Figure 2—figure supplement 1—source data 1. [file elife-56915-fig2-figsupp1-data1.xlsx]

## Sheet: Figure
	Time of sample collection						Variant Frequency
	Year	Month	Day	Hour	Minute		Glutamate	Glycine	Valine	Alanine
	2017	7	29	0	0		1	0	0	0		Data in bold are shown in the figure
	2017	8	1	9	45		1	0	0	0
	2017	8	3	13	50		1	0	0	0
	2017	8	7	10	30		1	0	0	0
	2017	8	10	13	0		1	0	0	0
	2017	8	14	15	10		1	0	0	0
	2017	8	18	15	0		1	0	0	0
	2017	8	21	10	0		1	0	0	0
	2017	8	24	10	27		1	0	0	0
	2017	8	28	9	0		1	0	0	0
	2017	8	31	12	0		1	0	0	0
	2017	9	7	12	0		1	0	0	0
	2017	9	11	9	30		1	0	0	0
	2017	9	21	11	30		1	0	0	0
	2017	9	26	10	20		1	0	0	0
	2017	9	28	13	30		1	0	0	0
	2017	9	29	15	0		1	0	0	0
	2017	10	4	15	11		1	0	0	0
	2017	10	5	10	35		1	0	0	0
	2017	10	11	10	40		1	0	0	0
	2017	10	19	1	25		1	0	0	0
	2017	10	19	10	0		1	0	0	0
	2017	10	23	7	0		1	0	0	0
	2017	10	30	12	30		0.63137	0.36863	0	0
	2017	11	2	9	30		1	0	0	0
	2017	11	10	10	45		1	0	0	0
	2017	11	16	9	25		0.728406	0.189961	0.081633	0
	2017	11	20	9	15		0.901611	0.098389	0	0
	2017	11	23	10	55		0.75	0	0	0.25
	2017	11	27	8	30		1	0	0	0
	2017	11	30	11	42		1	0	0	0
	2017	12	4	9	16		0.825713	0	0	0.174287
	2017	12	7	9	30		0.747092	0	0	0.252908
	2017	12	11	9	0		0.85122	0	0	0.14878
	2017	12	25	12	17		1	0	0	0
	2018	1	2	9	0		1	0	0	0
	2018	1	8	9	15		0.623445	0	0	0.376555
	2018	1	11	10	0		1	0	0	0
	2018	2	22	9	30		0	0.653543	0	0.346457
	2018	3	27	16	15		0	0	0	1
	2018	4	1	11	30		0	0	0	1
