# Supplementary material for: A large effective population size for established within-host influenza virus infection
Source: eLife. 2020 Aug 10;9:e56915. doi: 10.7554/eLife.56915 (PMC7431133; doi:10.7554/eLife.56915)
Supplement: Figure 2—figure supplement 2—source data 1. — Data are given according to the interval in time, measured in whole days between samples. [file elife-56915-fig2-figsupp2-data1.xlsx]

## Sheet: Figure A
		Time Difference (days)	Synonymous Sequence Difference (per nucleotide)	Nonsynonymous Sequence Difference (per nucleotide)
		0	0.00188138	0.000565118
		1	0.00209143	0.000651614
		2	0.00181558	0.000588458
		2	0.00175946	0.000436598
		3	0.00225274	0.000667442
		3	0.00206841	0.000669677
		3	0.00171735	0.000503618
		3	0.00174293	0.000521973
		3	0.00172638	0.000479599
		3	0.00257757	0.000667162
		3	0.00253902	0.000699944
		3	0.00267986	0.000735746
		3	0.00286909	0.000929269
		3	0.00214115	0.000801169
		4	0.00176147	0.000548564
		4	0.00240656	0.000626296
		4	0.00182214	0.000491807
		4	0.00138159	0.000404321
		4	0.00145976	0.000397847
		4	0.00199365	0.000554997
		4	0.00212168	0.000650414
		4	0.00208177	0.000693254
		4	0.0027585	0.00074696
		4	0.00328113	0.000868033
		4	0.0025097	0.000825121
		5	0.00159855	0.000567436
		5	0.00237801	0.000521353
		6	0.00198926	0.00057828
		6	0.00148194	0.000465141
		6	0.00251999	0.000768607
		6	0.00237538	0.000641881
		6	0.00255166	0.000717981
		7	0.00145304	0.000529959
		7	0.00229946	0.000609748
		7	0.00176158	0.000455325
		7	0.00177901	0.000479173
		7	0.00138233	0.000416869
		7	0.00182403	0.000501208
		7	0.00173464	0.000478567
		7	0.00222261	0.000565063
		7	0.00258077	0.000692723
		7	0.00290119	0.000717518
		7	0.00250191	0.000813954
		7	0.00297379	0.000828321
		7	0.00217072	0.000650591
		7	0.00301401	0.00101902
		7	0.00270535	0.000658286
		8	0.00206134	0.000640237
		8	0.00228803	0.000739984
		8	0.00154579	0.000498813
		8	0.00189145	0.000624104
		8	0.00203756	0.00062302
		8	0.00226139	0.000745357
		9	0.0021811	0.000630344
		9	0.00218174	0.000692284
		9	0.00249502	0.000541353
		10	0.00197014	0.000507285
		10	0.00160678	0.000463993
		10	0.00185251	0.000525321
		10	0.00164844	0.00046334
		10	0.0012294	0.000358899
		10	0.00200855	0.000621392
		10	0.002669	0.000826064
		10	0.00286747	0.000854829
		10	0.00257241	0.000911443
		11	0.00196542	0.000543937
		11	0.00154163	0.000480938
		11	0.00211619	0.000612805
		11	0.00174053	0.000441282
		11	0.00240745	0.00065501
		11	0.00210442	0.000641262
		11	0.00272933	0.000748761
		11	0.00222468	0.000659186
		11	0.00242834	0.000626015
		11	0.00322615	0.000853583
		12	0.0017974	0.000614622
		12	0.00232756	0.000741153
		12	0.00211951	0.000625032
		13	0.00227313	0.000613745
		13	0.00112801	0.000383587
		13	0.00166994	0.000488242
		13	0.00291433	0.000759334
		14	0.00180857	0.000550104
		14	0.00145405	0.000502336
		14	0.00165534	0.000454195
		14	0.00150552	0.000453067
		14	0.00142278	0.000372838
		14	0.00182058	0.00050463
		14	0.00187922	0.000487558
		14	0.00217987	0.000591265
		14	0.00186067	0.000606054
		14	0.00221151	0.00062056
		14	0.0017193	0.000577402
		14	0.00234078	0.000679414
		14	0.00298308	0.000867123
		14	0.00273387	0.000772591
		14	0.00226251	0.000783749
		14	0.00277248	0.000750461
		14	0.00264803	0.000721173
		15	0.00146898	0.000491736
		15	0.00226075	0.000449336
		15	0.00229851	0.000561183
		16	0.00201646	0.00057068
		17	0.00162676	0.000527402
		17	0.00172345	0.000503494
		17	0.00203923	0.000532734
		17	0.0018394	0.000496867
		17	0.00168911	0.00042288
		17	0.00182739	0.00054606
		17	0.00205695	0.000685407
		17	0.00240509	0.000930774
		18	0.00178392	0.000542791
		18	0.00178518	0.000546504
		18	0.00140262	0.000387826
		18	0.00230675	0.000697376
		18	0.00245951	0.000646185
		18	0.00234613	0.000710862
		18	0.00245735	0.000783498
		18	0.0027461	0.000695626
		18	0.00171571	0.000452956
		18	0.00239264	0.000851447
		19	0.00231326	0.000465255
		19	0.00248863	0.000710691
		20	0.0020632	0.000627644
		20	0.00210197	0.000592343
		20	0.00181168	0.000516503
		20	0.0014881	0.000490855
		20	0.00236303	0.000750831
		20	0.00224649	0.00078168
		20	0.00296458	0.000905907
		21	0.00108866	0.00037319
		21	0.00196102	0.00053069
		21	0.0020721	0.00062788
		21	0.00143324	0.000400506
		21	0.0016968	0.000459738
		21	0.00192916	0.000499193
		21	0.00167999	0.000502151
		21	0.00186708	0.000598215
		21	0.00202919	0.000640785
		21	0.00278152	0.000720063
		21	0.00253201	0.000846526
		21	0.00277096	0.000783078
		21	0.00258147	0.000717136
		22	0.00223194	0.000700563
		22	0.0018388	0.000554929
		22	0.00237545	0.000701365
		22	0.00194013	0.000617781
		22	0.00300556	0.000732839
		23	0.00186461	0.00053727
		23	0.00181582	0.000568193
		23	0.00235033	0.000526182
		23	0.00233087	0.000586958
		24	0.0016483	0.000463575
		24	0.00176393	0.000436466
		24	0.00164056	0.000444309
		24	0.00157509	0.000431047
		24	0.00162836	0.000417327
		24	0.00232126	0.000777363
		24	0.00214464	0.000609276
		24	0.00270753	0.000667908
		24	0.00279589	0.00076092
		25	0.00139999	0.000440112
		25	0.00203556	0.000567575
		25	0.00192778	0.000596147
		25	0.00199135	0.000617429
		25	0.00295057	0.000736659
		25	0.00296748	0.000875115
		26	0.00174108	0.000551973
		26	0.00224651	0.000502515
		26	0.0026626	0.000906153
		27	0.00189347	0.000535668
		27	0.00256408	0.000593415
		27	0.00264196	0.00092778
		28	0.00147606	0.00046611
		28	0.00187276	0.00057595
		28	0.0017701	0.000418678
		28	0.00131586	0.000393236
		28	0.00161533	0.00043173
		28	0.00163097	0.000482668
		28	0.00145516	0.00049285
		28	0.00186658	0.000633972
		28	0.00240616	0.00071721
		28	0.00232836	0.000649238
		28	0.00215484	0.000664132
		28	0.00251063	0.000740274
		28	0.00260876	0.000741902
		28	0.00285601	0.000870761
		28	0.0019952	0.000681276
		29	0.00181117	0.00042458
		29	0.0020559	0.000705444
		29	0.0028054	0.000705369
		30	0.00178134	0.000524442
		30	0.00147592	0.00050194
		30	0.0015404	0.000477606
		30	0.00226235	0.000713914
		31	0.00208319	0.000586254
		31	0.00171436	0.000487875
		31	0.00131879	0.000387452
		31	0.00263222	0.000833702
		31	0.00289517	0.000710266
		31	0.0029018	0.000842061
		31	0.00287886	0.000784565
		32	0.00192251	0.000561136
		32	0.00210864	0.000647155
		32	0.00208693	0.000571947
		32	0.00243475	0.000671018
		32	0.00252058	0.000732354
		32	0.00214982	0.000743712
		32	0.00256976	0.000704392
		32	0.00272556	0.000738033
		33	0.00207921	0.000632667
		33	0.00231066	0.000496676
		33	0.00327098	0.000868171
		34	0.00158008	0.000467912
		34	0.00214885	0.000595454
		34	0.00274895	0.000643236
		34	0.00232562	0.000779468
		35	0.00148596	0.000485962
		35	0.0016605	0.000497885
		35	0.00175229	0.000480721
		35	0.00222978	0.000565217
		35	0.00213889	0.00063604
		35	0.00273931	0.000652043
		35	0.00236542	0.000649039
		35	0.00179166	0.000587633
		35	0.00275902	0.000703577
		35	0.00266314	0.0008664
		35	0.00230271	0.000803866
		36	0.00243377	0.000515739
		36	0.00214003	0.000714486
		36	0.00250698	0.000749427
		36	0.00240927	0.000699722
		36	0.0021482	0.000688089
		37	0.00213099	0.000595664
		37	0.00260476	0.000654657
		38	0.00207995	0.000530471
		38	0.00193646	0.000515903
		38	0.00168373	0.000452713
		38	0.00145801	0.000455266
		38	0.00174966	0.000568754
		38	0.0029332	0.000878875
		38	0.00241807	0.000831475
		39	0.0014956	0.000446306
		39	0.00219713	0.00051921
		39	0.00232172	0.000715762
		39	0.00214784	0.000607574
		39	0.00209385	0.000634937
		39	0.0019583	0.000640047
		39	0.00280517	0.000741696
		39	0.0022891	0.000694619
		40	0.0014559	0.000505117
		40	0.0025384	0.00077512
		40	0.00304491	0.000721423
		41	0.00213393	0.000561305
		41	0.0014798	0.000423055
		41	0.00179592	0.000530773
		42	0.00180437	0.000571966
		42	0.00206578	0.00070731
		42	0.00158441	0.000438429
		42	0.00195857	0.000542712
		42	0.0016474	0.000517713
		42	0.00213251	0.000565499
		42	0.00218019	0.000662686
		42	0.00216955	0.000810975
		42	0.00215646	0.000667788
		42	0.00307051	0.000877314
		42	0.00275009	0.000883503
		42	0.00243696	0.000616857
		42	0.00282371	0.000675655
		43	0.00205489	0.000409026
		43	0.00224495	0.000687285
		43	0.00278074	0.000690064
		43	0.00243017	0.000739574
		44	0.00171741	0.000500204
		44	0.00185635	0.000535583
		45	0.00156288	0.00049357
		45	0.00179802	0.000481834
		45	0.00201461	0.000526013
		45	0.00269567	0.000674578
		45	0.00270635	0.000898263
		45	0.00198944	0.00065033
		46	0.00250436	0.000699324
		46	0.00215544	0.000581921
		46	0.00191087	0.000577527
		46	0.00229387	0.000581375
		46	0.00227285	0.000641498
		47	0.00261518	0.000624757
		47	0.00207926	0.000672744
		47	0.00212647	0.000604176
		48	0.0021951	0.000585393
		48	0.00186115	0.000561011
		48	0.00249977	0.000808426
		49	0.00154133	0.000462905
		49	0.00226104	0.000640688
		49	0.0016778	0.000524248
		49	0.00190343	0.000629997
		49	0.0021532	0.000606358
		49	0.00238426	0.000673034
		49	0.00216525	0.000565059
		49	0.00257105	0.000849872
		49	0.00228438	0.000792798
		49	0.00285792	0.000727312
		50	0.00250204	0.000586937
		50	0.00234233	0.000793304
		50	0.00238202	0.000749015
		50	0.00298288	0.000891789
		51	0.0021026	0.000591446
		51	0.001909	0.000538749
		51	0.00277442	0.00067198
		52	0.00185446	0.000514027
		52	0.00209915	0.000531685
		52	0.00171912	0.00051823
		52	0.00173798	0.000590091
		52	0.00224966	0.000655423
		52	0.00266299	0.000861423
		53	0.0022339	0.00074908
		53	0.00144422	0.000476528
		53	0.00208173	0.000609744
		53	0.0025169	0.000723325
		53	0.00235407	0.000722051
		53	0.00269097	0.000688571
		53	0.002343	0.000636043
		53	0.00190958	0.000634218
		53	0.00262483	0.000791385
		54	0.0020455	0.000590599
		54	0.00231717	0.00054186
		54	0.0016836	0.000510649
		54	0.00232394	0.000610561
		55	0.00280686	0.000693063
		55	0.00292391	0.000815029
		56	0.00239391	0.000566168
		56	0.00177065	0.000506932
		56	0.00175126	0.000547823
		56	0.00171331	0.000504588
		56	0.00168456	0.000573411
		56	0.00209667	0.000601783
		56	0.00225189	0.000647491
		56	0.00206273	0.000649781
		56	0.00273494	0.000654679
		56	0.00274025	0.000812121
		56	0.00234522	0.000687273
		57	0.00208955	0.000729238
		57	0.00263472	0.000892322
		58	0.00192738	0.000524273
		58	0.00217882	0.000558776
		58	0.00297517	0.000595281
		59	0.00247795	0.000597027
		59	0.00196226	0.000694606
		59	0.00231665	0.000603249
		59	0.00175984	0.000534114
		59	0.00190531	0.000617949
		59	0.00220555	0.000804129
		60	0.00180959	0.000520393
		60	0.00235357	0.000655964
		60	0.00239525	0.000716297
		60	0.00212389	0.000642066
		60	0.00192	0.000623165
		60	0.00233449	0.000603565
		61	0.00219677	0.000613216
		61	0.00278361	0.000723827
		61	0.00252697	0.000718593
		62	0.0023483	0.000773462
		62	0.00229327	0.000671971
		62	0.00144012	0.000457724
		62	0.00186419	0.000635545
		62	0.00244779	0.000666854
		62	0.00300211	0.000905783
		63	0.00166576	0.000482961
		63	0.0022044	0.000643918
		63	0.00215099	0.000624285
		63	0.00194906	0.000619978
		63	0.00265651	0.000633691
		63	0.00298899	0.000845619
		63	0.00222308	0.000829867
		63	0.00214052	0.000707109
		64	0.00237701	0.000690485
		64	0.00247288	0.00063217
		65	0.00241474	0.000663345
		65	0.0017108	0.000575948
		65	0.00321712	0.000765927
		66	0.00196541	0.000480605
		66	0.00202034	0.000577132
		66	0.00168915	0.000535813
		66	0.00218201	0.000659512
		66	0.00221139	0.000644621
		66	0.00271415	0.000756342
		67	0.00188676	0.000556864
		67	0.00214699	0.000668279
		67	0.00216842	0.000521836
		67	0.00226253	0.000591539
		67	0.00222899	0.000665543
		67	0.00165823	0.000521054
		68	0.00155918	0.000509517
		69	0.00195926	0.000606282
		69	0.0026553	0.000570068
		69	0.00267005	0.000983794
		70	0.00220851	0.00064098
		70	0.00191948	0.000656586
		70	0.00237122	0.000621318
		70	0.00240425	0.000672146
		70	0.00203751	0.000623028
		70	0.0021537	0.000648737
		70	0.00223874	0.000655537
		70	0.00289777	0.000843409
		70	0.00258594	0.000872135
		71	0.00210013	0.000602362
		71	0.00216673	0.000700881
		71	0.00213332	0.000611329
		72	0.00287085	0.000830639
		73	0.00179067	0.000599221
		73	0.00210107	0.000711359
		73	0.00235598	0.000670348
		73	0.00231872	0.000686968
		73	0.00239881	0.00056257
		73	0.00279876	0.000843496
		74	0.00232746	0.000689962
		74	0.00234425	0.00066216
		74	0.00222401	0.000695829
		74	0.00214411	0.000666026
		74	0.00224774	0.000552564
		74	0.00266943	0.00066927
		75	0.00215089	0.000683103
		75	0.00252585	0.000652373
		75	0.00232874	0.000705573
		76	0.0019872	0.000635542
		76	0.00288012	0.000607825
		77	0.00175319	0.000541002
		77	0.00166019	0.000601506
		77	0.00207135	0.000606586
		77	0.00248462	0.000649294
		77	0.00206815	0.000626581
		77	0.00221898	0.000552387
		77	0.00217485	0.000652249
		77	0.0024028	0.000846222
		78	0.00220074	0.000694386
		79	0.00206127	0.000623148
		79	0.00213465	0.000690855
		80	0.00252034	0.000679031
		80	0.0021431	0.000650673
		80	0.00283878	0.000811763
		81	0.00187729	0.000561395
		81	0.00186553	0.000586329
		81	0.00240528	0.000742536
		81	0.00234685	0.00069539
		81	0.00215376	0.000654611
		81	0.00263325	0.000666664
		81	0.00228217	0.000707535
		82	0.00220107	0.000679048
		82	0.00185365	0.000670954
		83	0.0018542	0.000607528
		83	0.00256835	0.000694388
		84	0.00246071	0.000690546
		84	0.00233641	0.000692538
		84	0.00215025	0.000714833
		84	0.00171564	0.000589126
		84	0.00216174	0.000645664
		84	0.00267394	0.000664904
		84	0.00268325	0.000785838
		84	0.00213524	0.000508115
		86	0.00235778	0.000716492
		87	0.00212478	0.000685209
		87	0.0023862	0.000690593
		87	0.0024791	0.000619191
		87	0.00233465	0.000805085
		87	0.00218866	0.000829561
		88	0.00195711	0.000617763
		88	0.00261397	0.000702575
		88	0.00184661	0.000576547
		88	0.00183498	0.000621913
		88	0.00222284	0.00056041
		88	0.00218971	0.000687314
		89	0.00249735	0.000664059
		90	0.00254891	0.000735579
		90	0.00217067	0.000656634
		90	0.00262295	0.000660629
		91	0.00205877	0.000655064
		91	0.00245164	0.000713594
		91	0.00241435	0.000620679
		91	0.00203265	0.000663461
		91	0.00277557	0.000838719
		91	0.00224926	0.000805982
		91	0.00240857	0.000589544
		92	0.00232663	0.000746786
		93	0.00208461	0.000700609
		93	0.00213333	0.000673646
		94	0.00256784	0.000687547
		94	0.0023863	0.000719723
		94	0.00240445	0.000589521
		94	0.00287202	0.000814971
		95	0.00231512	0.000776128
		95	0.0019342	0.000631989
		95	0.00228504	0.000561956
		95	0.00218111	0.000563144
		95	0.00217666	0.000705415
		95	0.00254575	0.000854044
		96	0.00239783	0.000753763
		96	0.00249094	0.000665404
		97	0.00268283	0.000668248
		98	0.00193315	0.000614133
		98	0.00254808	0.000703112
		98	0.00222738	0.000704677
		98	0.00263503	0.000787677
		98	0.00219064	0.000553927
		98	0.00244457	0.000878809
		98	0.00294072	0.000664235
		99	0.00212067	0.000713157
		101	0.00205934	0.000707121
		101	0.00228237	0.000709181
		101	0.00234729	0.000561572
		101	0.0018562	0.000627663
		101	0.0028945	0.000834664
		101	0.00232467	0.000843974
		102	0.00188855	0.000664596
		102	0.00214597	0.000565804
		102	0.00263474	0.000681862
		103	0.00234714	0.000645077
		104	0.00239778	0.000785505
		104	0.00285395	0.000858067
		105	0.00186795	0.000619144
		105	0.0024043	0.000707835
		105	0.00258188	0.000675886
		105	0.00237611	0.000693913
		105	0.0024491	0.000587316
		105	0.00215154	0.00082917
		105	0.00246669	0.000643429
		105	0.0022138	0.000672895
		107	0.00229063	0.00068897
		108	0.0028253	0.000708538
		108	0.00299633	0.000803688
		108	0.00224862	0.000562522
		108	0.0024394	0.000850541
		109	0.00194694	0.000638116
		109	0.00227788	0.000735424
		109	0.00241897	0.000641179
		109	0.00213546	0.00065918
		110	0.00227953	0.000741465
		111	0.00254108	0.000767115
		111	0.00244329	0.000881845
		112	0.00240511	0.000661525
		112	0.00211155	0.000688224
		112	0.00275082	0.000832897
		112	0.00239558	0.000567792
		112	0.00234087	0.000626548
		113	0.00244307	0.000619267
		114	0.00217034	0.000723062
		114	0.00284113	0.000732175
		115	0.00284403	0.000855609
		115	0.00257432	0.000819801
		115	0.00264745	0.000696234
		116	0.00191165	0.000635194
		116	0.00258949	0.000689118
		116	0.00201243	0.0006972
		117	0.00223359	0.000630221
		117	0.00237311	0.000658055
		118	0.00197129	0.00068552
		119	0.00267976	0.00083402
		119	0.00244489	0.000628521
		119	0.00222598	0.000850517
		119	0.00243057	0.000583258
		119	0.0021157	0.000685268
		121	0.0022616	0.000772354
		121	0.0028923	0.000872478
		122	0.00256274	0.000920023
		123	0.00216915	0.00059523
		123	0.00262835	0.000718498
		123	0.00197801	0.000668654
		124	0.00268404	0.00084037
		124	0.00215444	0.000640103
		125	0.00258128	0.000652541
		126	0.00217569	0.000863744
		126	0.00276609	0.00074621
		126	0.00222592	0.000699489
		127	0.00237741	0.000663109
		128	0.00247935	0.000664616
		128	0.00258213	0.000921474
		129	0.00200181	0.000704304
		130	0.00243025	0.000689133
		131	0.00224334	0.000891654
		131	0.0020432	0.000600384
		132	0.00282232	0.000763429
		133	0.00246873	0.000682102
		134	0.0024891	0.000691792
		135	0.00227612	0.000671289
		137	0.0020861	0.000712259
		137	0.00221855	0.000656088
		140	0.00217001	0.000753109
		141	0.00275008	0.000675632
		144	0.001908	0.000688734
		145	0.00225128	0.000670417
		146	0.0020862	0.000743209
		148	0.00240223	0.000713136
		149	0.00221008	0.00076465
		152	0.00205521	0.000651421
		154	0.00236327	0.000739666
		157	0.00247625	0.00075606

## Sheet: Figure B
		Time Difference (days)	Synonymous Sequence Difference (per nucleotide)	Nonsynonymous Sequence Difference (per nucleotide)
		5	0.00170084	0.000593391
		67	0.00343953	0.001155
		174	0.00424843	0.00108899
		179	0.00382546	0.00116305
		241	0.00505266	0.0015037
		246	0.00450704	0.00146701
