# Supplementary material for: A large effective population size for established within-host influenza virus infection
Source: eLife. 2020 Aug 10;9:e56915. doi: 10.7554/eLife.56915 (PMC7431133; doi:10.7554/eLife.56915)
Supplement: Figure 2—figure supplement 3—source data 1. — Equivalent distances for a single generation generated from simulated data at different effective population sizes are also provided. The calculated equivalent distance per generation from the sequence data is also provided. [file elife-56915-fig2-figsupp3-data1.xlsx]

## Sheet: Patient W Distances
		Time Difference (days)	Sequence Difference (nucleotides)
		6	25.991
		7	45.3141			Values in italics were excluded from the regression calculation
		7	35.8712
		7	6.17913
		7	9.31347
		7	8.55936
		7	9.12792
		13	32.4027
		14	30.0881
		14	8.10345
		14	6.51476
		14	11.1045
		20	13.7529
		21	6.6264
		21	9.74576
		28	8.87557
		28	9.93235
		34	29.3101
		35	6.73534
		41	24.6276
		41	36.1749
		42	10.6439
		48	28.9233
		48	32.3032
		48	16.0609
		49	7.92544
		55	25.0678
		55	35.4061
		55	11.6956
		56	7.81493
		62	25.959
		62	33.8967
		62	14.2815
		69	33.7685
		69	13.1512
		76	12.9941

## Sheet: Patient X Distances
		Time Difference (days)	Sequence Difference (nucleotides)
		7	7.23816
		7	10.4139
		7	9.26735
		7	7.81292
		14	9.42924
		14	9.473
		14	10.0493
		14	10.6862
		21	8.42532
		21	9.76124
		21	10.6753
		28	8.33191
		28	10.6699
		30	10.8756
		35	11.755
		42	10.4065
		44	14.9852
		51	13.9719
		58	13.7045
		65	15.8777
		72	14.9658

## Sheet: Patient Y Distances
		Time Difference (days)	Sequence Difference (nucleotides)
		7	11.9638
		7	11.946
		7	10.8005
		7	8.99428
		7	12.3396
		7	15.6789
		8	12.3037
		13	12.2563
		14	6.80629
		14	11.9438
		14	11.7975
		14	10.9858
		15	17.0066
		20	13.0262
		21	10.8336
		21	13.4786
		21	12.1227
		21	11.2194
		27	12.0655
		28	11.8422
		28	13.5591
		28	13.8377
		28	11.7818
		34	9.45209
		35	12.0166
		35	11.6696
		35	18.5628
		41	13.6392
		42	12.7467
		42	16.8069
		48	9.09382
		49	14.7252
		49	16.9211
		56	12.6553
		56	17.2247
		63	17.2827

## Sheet: Patient Z Distances
		Time Difference (days)	Sequence Difference (nucleotides)
		1	12.0503
		5	8.56634
		5	11.8997
		6	10.9712
		7	7.74178
		7	15.228
		7	20.1128
		7	24.1028
		10	9.54532
		11	15.0179
		14	17.7268
		14	11.3978
		14	28.0516
		16	12.637
		21	14.6369
		21	9.78327
		21	22.1711
		23	12.8801
		26	13.436
		27	18.3483
		28	14.3463
		28	22.5603
		30	21.7292
		33	13.7328
		34	18.1875
		35	20.5742
		37	14.3277
		40	20.3463
		41	23.3294
		42	16.6426
		44	22.2145
		47	15.179
		48	20.5718
		49	22.589
		54	22.0202
		55	24.1796

## Sheet: Patient W Simulations
		Effective N	Mean Distance	Lower Bound	Upper Bound
		10000	0.135133	0.0899	0.1926
		20000	0.0941186	0.0602	0.1386		Sequence Data
		30000	0.0744922	0.0488667	0.111033		Estimated Rate per Generation	0.0198122
		40000	0.065588	0.0433	0.09735		Lower Bound	0.00235997
		50000	0.0619583	0.03708	0.10364		Upper Bound	0.0372644
		60000	0.0552367	0.03495	0.0900667
		80000	0.0474962	0.031675	0.0711875
		100000	0.0430631	0.02801	0.06953
		200000	0.0293389	0.018655	0.04296
		300000	0.0247586	0.0154233	0.0384467
		400000	0.0228014	0.0136225	0.0389075
		500000	0.0184226	0.01212	0.02938
		600000	0.0173533	0.0109133	0.02773
		800000	0.0154832	0.00991125	0.0247838
		1000000	0.0128272	0.008147	0.02034
		2000000	0.00933811	0.0059375	0.014181
		3000000	0.00775743	0.00491267	0.0127713
		4000000	0.00662073	0.00413225	0.00972425
		5000000	0.00591406	0.0036842	0.0091876
		10000000	0.0043222	0.0027225	0.0071004
		15000000	0.00335767	0.00213393	0.005113
		20000000	0.00289004	0.00180705	0.00441705
		25000000	0.00259789	0.00163516	0.00408268
		30000000	0.00238279	0.00151677	0.0036919
		40000000	0.00204602	0.0012998	0.00321148
		45000000	0.00193173	0.00119844	0.00307976
		50000000	0.00185281	0.0011749	0.00286262
		60000000	0.00169037	0.001077	0.00265483
		70000000	0.00156136	0.0009835	0.00238054
		80000000	0.00146109	0.000905513	0.00227415
		90000000	0.00137931	0.000882344	0.00210512
		100000000	0.00130719	0.00081801	0.00205159
		120000000	0.00119536	0.00075385	0.00187961
		150000000	0.00106899	0.000656553	0.00168716
		200000000	0.000924332	0.000601725	0.00150987

## Sheet: Patient X Simulations
		Effective N	Mean Distance	Lower Bound	Upper Bound
		10000	0.235425	0.1927	0.2968
		20000	0.163785	0.1324	0.2076		Sequence Data
		30000	0.133372	0.106033	0.1641		Estimated Rate per Generation	0.0313067
		40000	0.114817	0.090575	0.139375		Lower Bound	0.0213114
		50000	0.106307	0.08414	0.13932		Upper Bound	0.0413021
		60000	0.0954385	0.0756	0.11965
		80000	0.081332	0.064875	0.10335
		100000	0.0737472	0.05688	0.09418
		200000	0.0522854	0.04162	0.06451
		300000	0.042926	0.0338133	0.0556633
		400000	0.0376143	0.028665	0.048205
		500000	0.0329632	0.026928	0.041708
		600000	0.0303133	0.0239083	0.0383667
		800000	0.0264152	0.0210288	0.0338288
		1000000	0.0230787	0.018711	0.028644
		1500000	0.0192674	0.0149267	0.0249093
		2000000	0.0164971	0.012765	0.0216905
		2500000	0.0153188	0.0120412	0.02154
		3000000	0.0135963	0.0108757	0.0176387
		3500000	0.0132241	0.00996686	0.0206363
		4000000	0.0117339	0.00930625	0.0152117

## Sheet: Patient Y Simulations
		Effective N	Mean Distance	Lower Bound	Upper Bound
		10000	0.215018	0.1529	0.3362
		20000	0.150842	0.1027	0.2315		Sequence Data
		30000	0.123389	0.0833333	0.2007		Estimated Rate per Generation	0.0199552
		40000	0.106137	0.071875	0.17305		Lower Bound	0.00790449
		50000	0.100638	0.0684	0.1599		Upper Bound	0.0376
		60000	0.087935	0.0576333	0.1388
		80000	0.0757557	0.0502875	0.116913
		100000	0.0696711	0.04711	0.11862
		200000	0.047962	0.03238	0.077795
		300000	0.0399141	0.0268167	0.06599
		400000	0.0362029	0.02353	0.066865
		500000	0.0302698	0.019918	0.049246
		600000	0.0283801	0.0193033	0.04438
		800000	0.0250814	0.01599	0.0425725
		1000000	0.0214795	0.014802	0.03314
		2000000	0.0150326	0.0102645	0.0244915
		3000000	0.0126092	0.00857733	0.0207077
		4000000	0.0109322	0.007112	0.0188225
		5000000	0.00984363	0.0066828	0.0165272
		6000000	0.00940954	0.0062615	0.0160643
		7000000	0.00838255	0.00565457	0.014369
		8000000	0.00770042	0.00518713	0.0133604
		9000000	0.00711528	0.00498744	0.0112477
		10000000	0.00697235	0.00444	0.0106604
		15000000	0.0054136	0.0035834	0.00870367
		20000000	0.00465927	0.0030757	0.0073699
		25000000	0.00418916	0.00279148	0.00660308
		30000000	0.0038161	0.00261603	0.0061149
		35000000	0.00352991	0.00248126	0.00556763
		40000000	0.00331579	0.00228368	0.00524373
		45000000	0.00313437	0.00221189	0.00507298
		50000000	0.00297984	0.00208332	0.0047687

## Sheet: Patient Z Simulations
		Effective N	Mean Distance	Lower Bound	Upper Bound
		10000	0.255139	0.1813	0.3517
		20000	0.177042	0.1281	0.23775		Sequence Data
		30000	0.144246	0.104333	0.194267		Estimated Rate per Generation	0.0480563
		40000	0.123775	0.091675	0.1642		Lower Bound	0.0148247
		50000	0.120286	0.0797	0.18348		Upper Bound	0.0812878
		60000	0.105628	0.07425	0.1515
		80000	0.0920317	0.0642125	0.131938
		100000	0.0835973	0.05822	0.12242
		200000	0.0576373	0.0398	0.086415
		300000	0.0500435	0.0343767	0.0719567
		400000	0.0429062	0.0296075	0.065565
		500000	0.035578	0.025828	0.049426
		600000	0.0339399	0.0239983	0.052565
		800000	0.0309282	0.0211888	0.0488363
		1000000	0.02537	0.018788	0.035021
		2000000	0.0176841	0.0126195	0.025386
		3000000	0.0150409	0.0107693	0.022788
		4000000	0.012865	0.0094315	0.0188555
		5000000	0.0116989	0.0081614	0.0171016
		6000000	0.0111636	0.00711233	0.0170823
		8000000	0.00922061	0.00638462	0.01325
		10000000	0.00863878	0.0058902	0.0140235
		15000000	0.00646775	0.00462067	0.0089502
		20000000	0.00563017	0.0039715	0.0079708
		25000000	0.00503235	0.00353388	0.00723832
		30000000	0.00461469	0.0033051	0.0062276
		35000000	0.00426305	0.00310217	0.00576574
		40000000	0.00397383	0.00290205	0.00526583
		45000000	0.00375023	0.00274091	0.00508302
		50000000	0.00358031	0.00254292	0.00482938
