# Supplementary material for: A large effective population size for established within-host influenza virus infection
Source: eLife. 2020 Aug 10;9:e56915. doi: 10.7554/eLife.56915 (PMC7431133; doi:10.7554/eLife.56915)
Supplement: Figure 2—figure supplement 4—source data 1. — Only non-zero frequencies are reported. These allele frequencies were processed using a statistical method for removing false positive variant calls as a precursor step within the Wright-Fisher simulation. [file elife-56915-fig2-figsupp4-data1.xlsx]

## Sheet: Sheet1
Sorted allele frequencies by date
	2017-07-29	2017-08-01	2017-08-02	2017-08-07	2017-08-10	2017-08-14	2017-08-18	2017-08-21	2017-08-24	2017-08-28	2017-08-31	2017-09-07	2017-09-11	2017-09-21	2017-09-26	2017-09-29	2017-10-05	2017-10-11	2017-10-19	2017-10-19	2017-10-23	2017-10-30	2017-11-02	2017-11-10	2017-11-16	2017-11-20	2017-11-23	2017-11-27	2017-12-04	2017-12-07	2017-12-11	2017-12-25	2018-01-02
	0.460343	0.450836	0.460222	0.485011	0.48265	0.467264	0.479183	0.45881	0.439391	0.479011	0.495286	0.5	0.452594	0.480095	0.496303	0.486224	0.496192	0.481577	0.475	0.470149	0.479705	0.475425	0.46933	0.468834	0.479484	0.479439	0.459184	0.450382	0.415819	0.494806	0.487342	0.465464	0.497464	0.498752	0.42533	0.5	0.482353	0.493936	0.5	0.454545	0.461538
	0.394255	0.427876	0.413859	0.466155	0.421236	0.424621	0.463354	0.444444	0.428906	0.473666	0.493082	0.444889	0.448811	0.461255	0.487002	0.478386	0.493108	0.475565	0.468689	0.432985	0.476923	0.377724	0.407407	0.453123	0.445783	0.460967	0.440057	0.447172	0.399854	0.475439	0.482143	0.408867	0.495354	0.498405	0.421053	0.484735	0.480973	0.484541	0.5	0.349138	0.454545
	0.385532	0.416667	0.411765	0.382979	0.37068	0.353774	0.453084	0.403118	0.377954	0.467391	0.486239	0.437066	0.435361	0.457674	0.473412	0.433825	0.479452	0.471113	0.456522	0.40813	0.394632	0.343781	0.40596	0.443432	0.375927	0.460173	0.425613	0.427055	0.37963	0.465874	0.474006	0.395344	0.492418	0.495021	0.418871	0.43401	0.471151	0.437073	0.5	0.328185	0.444444
	0.379827	0.37931	0.41024	0.366157	0.370488	0.349628	0.410789	0.392966	0.330803	0.410554	0.469456	0.429111	0.422257	0.453974	0.470143	0.427892	0.451877	0.467058	0.434599	0.376539	0.333333	0.323529	0.403219	0.43888	0.371795	0.375471	0.425532	0.412662	0.365809	0.441027	0.473684	0.365011	0.490302	0.488793	0.392857	0.428751	0.468257	0.410853	0.5	0.3	0.4
	0.359644	0.372208	0.363101	0.363538	0.369438	0.334245	0.408947	0.366197	0.319028	0.365565	0.468399	0.426166	0.354984	0.441951	0.448091	0.374641	0.451106	0.458164	0.43302	0.363798	0.328283	0.313397	0.369688	0.438017	0.345006	0.372424	0.404045	0.402535	0.363702	0.360471	0.471101	0.360623	0.485514	0.472173	0.369231	0.398148	0.458735	0.378378	0.5	0.3	0.384615
	0.356522	0.348837	0.343464	0.328606	0.366313	0.327486	0.353535	0.362179	0.285714	0.362934	0.388767	0.406875	0.334658	0.415599	0.427957	0.319149	0.441791	0.457977	0.416667	0.363636	0.316063	0.303922	0.35146	0.4375	0.344689	0.343009	0.396567	0.394034	0.35683	0.35443	0.434198	0.357337	0.479661	0.464325	0.352941	0.34796	0.458151	0.364071	0.46988	0.242424	0.384615
	0.34542	0.330396	0.322111	0.321429	0.357857	0.327458	0.350157	0.339369	0.273819	0.341772	0.335484	0.388889	0.328886	0.410959	0.413812	0.307794	0.42073	0.446865	0.397386	0.360075	0.303325	0.285714	0.3193	0.434018	0.333333	0.338628	0.377618	0.39234	0.32128	0.352113	0.4125	0.357143	0.479655	0.454321	0.350777	0.3394	0.448438	0.358079	0.459016	0.222222	0.380952
	0.327957	0.314957	0.25052	0.308556	0.32845	0.32738	0.321429	0.32756	0.25778	0.336038	0.325335	0.381248	0.319588	0.38895	0.389305	0.300999	0.414265	0.442544	0.396009	0.358156	0.281325	0.285714	0.296364	0.404303	0.332008	0.318432	0.373884	0.380512	0.321109	0.311846	0.405738	0.35	0.479434	0.368479	0.345995	0.321344	0.44515	0.356522	0.38843	0.212838	0.361111
	0.298024	0.297532	0.243345	0.306818	0.326737	0.314397	0.313953	0.279669	0.244351	0.32	0.268197	0.365625	0.305556	0.331771	0.377963	0.297872	0.404875	0.433458	0.370298	0.357995	0.277778	0.271097	0.281366	0.402502	0.3	0.3125	0.373373	0.375	0.32089	0.265934	0.391304	0.346841	0.47818	0.365155	0.333333	0.31497	0.443206	0.34478	0.381818	0.201005	0.351351
	0.291045	0.284254	0.208755	0.289944	0.325964	0.3	0.264969	0.277882	0.214092	0.245532	0.263305	0.333333	0.303046	0.327106	0.347772	0.258702	0.401452	0.431648	0.333333	0.337934	0.274237	0.249288	0.255319	0.402426	0.281341	0.303015	0.298225	0.368912	0.319061	0.256374	0.380228	0.328652	0.477597	0.359919	0.325953	0.312836	0.44186	0.337466	0.367188	0.176471	0.347826
	0.264373	0.281912	0.204545	0.270221	0.325203	0.292348	0.240457	0.27184	0.189716	0.225	0.248322	0.327134	0.296916	0.324224	0.347307	0.25633	0.38724	0.418919	0.308111	0.284531	0.26087	0.236842	0.249893	0.38141	0.278967	0.300805	0.292517	0.364047	0.313422	0.247027	0.377483	0.325783	0.4748	0.35621	0.320275	0.311627	0.43886	0.326003	0.365079	0.173913	0.333333
	0.252405	0.275547	0.19827	0.246953	0.298697	0.28303	0.226505	0.26361	0.187962	0.213781	0.230769	0.314578	0.286776	0.307394	0.343437	0.242647	0.38443	0.41672	0.284404	0.277778	0.251074	0.233544	0.226912	0.37904	0.268571	0.299889	0.283599	0.355733	0.30303	0.234568	0.375	0.306122	0.473684	0.354777	0.314483	0.307692	0.431141	0.30649	0.36	0.173913	0.333333
	0.249245	0.253968	0.198186	0.245336	0.290902	0.281313	0.19377	0.248918	0.184848	0.210838	0.226508	0.295612	0.285714	0.277449	0.300283	0.23875	0.369369	0.386535	0.284404	0.274316	0.227649	0.231616	0.224861	0.376585	0.26113	0.294367	0.268236	0.355401	0.30276	0.208333	0.375	0.291123	0.467203	0.350892	0.307985	0.306338	0.431123	0.280397	0.340909	0.171429	0.333333
	0.245955	0.249475	0.193226	0.215902	0.277567	0.274832	0.188127	0.244707	0.182968	0.196859	0.22504	0.290698	0.28071	0.268218	0.296348	0.224719	0.364657	0.385337	0.280822	0.271845	0.218389	0.215287	0.222103	0.372708	0.260545	0.263712	0.25554	0.348312	0.294202	0.19811	0.363636	0.284505	0.466283	0.349794	0.294118	0.300945	0.430906	0.28005	0.339552	0.166667	0.333333
	0.241472	0.194304	0.181818	0.195652	0.268293	0.268293	0.186047	0.235775	0.182891	0.174653	0.215928	0.283178	0.257732	0.252141	0.279514	0.220615	0.355153	0.385267	0.265399	0.265737	0.214859	0.215	0.210526	0.356258	0.232602	0.258158	0.238059	0.343225	0.285211	0.193377	0.352941	0.277778	0.463514	0.347719	0.287879	0.298731	0.429084	0.264713	0.333333	0.165663	0.333333
	0.225206	0.186667	0.176471	0.194962	0.259109	0.25	0.178254	0.220295	0.181818	0.165944	0.210815	0.25	0.248091	0.244547	0.270881	0.215852	0.353482	0.379989	0.258717	0.265333	0.214067	0.212398	0.207131	0.354178	0.229183	0.253373	0.228108	0.340304	0.282843	0.189072	0.342466	0.254691	0.462532	0.344233	0.277376	0.296118	0.428571	0.205447	0.333333	0.155844	0.333333
	0.223869	0.178127	0.175975	0.188119	0.243546	0.243442	0.169415	0.215919	0.17725	0.165783	0.186239	0.246479	0.22078	0.205382	0.258065	0.213554	0.345163	0.364571	0.257345	0.256961	0.206951	0.208695	0.200953	0.353887	0.211598	0.242837	0.209501	0.33501	0.281358	0.185139	0.336449	0.254425	0.458574	0.341949	0.268871	0.294252	0.427263	0.1784	0.333333	0.13913	0.324324
	0.218706	0.168879	0.173913	0.186235	0.235467	0.22344	0.152679	0.197388	0.165163	0.164557	0.176421	0.232709	0.206846	0.201754	0.258032	0.2	0.337209	0.362079	0.251472	0.249786	0.2	0.202067	0.194493	0.333333	0.209575	0.23692	0.207031	0.302252	0.28125	0.183182	0.335404	0.25	0.452456	0.341862	0.25719	0.29192	0.42063	0.175961	0.295533	0.134328	0.3125
	0.211108	0.167789	0.170455	0.171352	0.228508	0.211713	0.131953	0.192482	0.16177	0.161265	0.175364	0.228818	0.205243	0.194301	0.237325	0.196763	0.328654	0.359119	0.248152	0.249134	0.181774	0.200711	0.190314	0.307692	0.207076	0.235562	0.204082	0.294821	0.27195	0.182665	0.333333	0.233982	0.447534	0.337669	0.208935	0.290901	0.400639	0.165856	0.283019	0.130522	0.307692
	0.205484	0.15739	0.163551	0.167076	0.225845	0.210899	0.1268	0.191822	0.155797	0.15979	0.170791	0.228245	0.204047	0.181818	0.229508	0.192621	0.317747	0.351994	0.237605	0.248056	0.180058	0.198909	0.179409	0.298936	0.204475	0.215952	0.201329	0.284042	0.264407	0.174757	0.329545	0.228961	0.441493	0.333828	0.207585	0.289137	0.399964	0.152542	0.282353	0.118519	0.3
	0.19759	0.137343	0.155408	0.16663	0.222423	0.208599	0.123088	0.187862	0.149056	0.149897	0.166688	0.214286	0.201891	0.173226	0.217552	0.189119	0.306868	0.344532	0.236737	0.242944	0.178606	0.186323	0.17762	0.288426	0.196581	0.209715	0.200589	0.260915	0.261759	0.169885	0.295547	0.223932	0.441026	0.333757	0.200492	0.282936	0.394648	0.138636	0.278351	0.117647	0.28
	0.192746	0.134754	0.152658	0.14809	0.216166	0.207317	0.121484	0.1875	0.148005	0.144023	0.166667	0.209302	0.201326	0.171058	0.215054	0.18629	0.287072	0.33833	0.221323	0.241239	0.177778	0.182981	0.171028	0.274412	0.186508	0.209579	0.199268	0.217316	0.253833	0.162767	0.291045	0.213611	0.438023	0.332913	0.196064	0.280899	0.390171	0.127747	0.27381	0.116466	0.277778
	0.184432	0.117904	0.150426	0.131829	0.212803	0.204082	0.116416	0.184266	0.143959	0.143217	0.163938	0.204082	0.193798	0.16688	0.210526	0.184872	0.270701	0.322111	0.217808	0.237089	0.174072	0.181681	0.16995	0.273904	0.185122	0.206497	0.194935	0.207125	0.25	0.16	0.272727	0.211976	0.430702	0.329332	0.193711	0.279168	0.385396	0.119403	0.266667	0.114286	0.25
	0.181818	0.117477	0.142857	0.131783	0.196009	0.202586	0.114861	0.181818	0.142857	0.139648	0.161574	0.194392	0.16442	0.164384	0.205	0.175986	0.244292	0.319986	0.21299	0.236882	0.167315	0.180116	0.151515	0.268803	0.179348	0.205882	0.192706	0.2	0.242424	0.159509	0.256345	0.199877	0.413238	0.32509	0.192701	0.276835	0.381024	0.114885	0.251337	0.112903	0.25
	0.163408	0.115132	0.136694	0.129978	0.194412	0.2	0.105289	0.168248	0.142857	0.139138	0.154522	0.186603	0.163158	0.16224	0.195884	0.174557	0.243165	0.31884	0.210708	0.230769	0.162791	0.175338	0.136906	0.267857	0.17788	0.202616	0.188695	0.198825	0.236515	0.159314	0.255061	0.199138	0.40535	0.321084	0.190273	0.266771	0.377342	0.113475	0.25	0.109145	0.230769
	0.160908	0.114877	0.133333	0.129573	0.193444	0.197015	0.103659	0.148842	0.138312	0.13523	0.151829	0.166667	0.158509	0.142374	0.19588	0.16384	0.241135	0.315194	0.209596	0.227473	0.145306	0.171335	0.13259	0.263928	0.174987	0.193942	0.183152	0.195642	0.232986	0.159091	0.25	0.19061	0.393663	0.317073	0.189944	0.25742	0.375533	0.109275	0.25	0.107143	0.208333
	0.16	0.113232	0.120794	0.125671	0.179318	0.174719	0.101266	0.143409	0.137486	0.134903	0.136364	0.166667	0.156782	0.137639	0.184868	0.147421	0.23159	0.309296	0.209432	0.227086	0.143153	0.1625	0.130366	0.257549	0.174298	0.191535	0.181102	0.192982	0.231443	0.153007	0.248079	0.18594	0.393547	0.315766	0.179648	0.256364	0.374464	0.0951673	0.25	0.105263	0.2
	0.16	0.111594	0.116279	0.122173	0.168065	0.173405	0.0985202	0.142254	0.13265	0.130534	0.136215	0.15425	0.150512	0.136417	0.18207	0.146609	0.229433	0.308049	0.204571	0.226644	0.141256	0.162451	0.128354	0.25187	0.170161	0.190388	0.179364	0.191282	0.221741	0.149705	0.239766	0.182128	0.37963	0.312757	0.178145	0.255368	0.373935	0.0897145	0.25	0.103448	0.2
	0.15987	0.111111	0.111303	0.115868	0.161966	0.168782	0.0967239	0.1375	0.132329	0.125	0.131498	0.147092	0.150253	0.133333	0.180273	0.143173	0.222222	0.305112	0.175045	0.220799	0.139535	0.159459	0.127557	0.246914	0.168608	0.186047	0.17284	0.190983	0.217203	0.14619	0.223214	0.180371	0.375	0.310982	0.176267	0.253051	0.372408	0.0835082	0.25	0.102828	0.188679
	0.15942	0.106422	0.110233	0.114147	0.160075	0.167534	0.0926061	0.133333	0.131535	0.124571	0.129032	0.141176	0.148754	0.132565	0.162107	0.142979	0.206186	0.287857	0.16215	0.220594	0.128205	0.157807	0.123982	0.236541	0.159434	0.177273	0.170127	0.189308	0.216084	0.141831	0.220395	0.171459	0.35882	0.304603	0.17294	0.245937	0.371447	0.0748874	0.242038	0.0929577	0.177778
	0.159204	0.102274	0.109091	0.114068	0.159269	0.15873	0.0923713	0.124518	0.125514	0.124107	0.125	0.137784	0.135862	0.128743	0.158879	0.142857	0.195613	0.259825	0.157407	0.220111	0.127015	0.15493	0.123709	0.235294	0.15734	0.171995	0.160305	0.187554	0.215272	0.138889	0.216704	0.169171	0.350856	0.298851	0.171918	0.240006	0.365559	0.0711297	0.24	0.0918367	0.173913
	0.153208	0.101911	0.108967	0.113053	0.158528	0.157439	0.0916581	0.122782	0.117647	0.118805	0.120996	0.123482	0.123608	0.127941	0.15757	0.141513	0.170388	0.241667	0.153729	0.217012	0.126873	0.151388	0.122892	0.234043	0.154421	0.16695	0.159009	0.187359	0.213458	0.134249	0.2	0.164005	0.343426	0.297565	0.171066	0.220123	0.363709	0.0672941	0.238636	0.0898876	0.166667
	0.138523	0.0987302	0.104094	0.111627	0.158458	0.156844	0.0910215	0.111842	0.114428	0.117714	0.107043	0.116107	0.1171	0.126758	0.146638	0.140798	0.136943	0.229223	0.147381	0.216888	0.117647	0.146229	0.12023	0.227273	0.154301	0.156028	0.158388	0.183575	0.207497	0.13088	0.2	0.160109	0.336365	0.297388	0.169448	0.216608	0.362461	0.0665656	0.233333	0.0890411	0.166667
	0.136826	0.0970704	0.0978343	0.109312	0.15828	0.150828	0.09	0.105691	0.108958	0.116815	0.0992005	0.114286	0.111111	0.121656	0.145415	0.138934	0.135593	0.226585	0.136992	0.216009	0.115996	0.143891	0.116434	0.225777	0.147413	0.154764	0.153694	0.177317	0.207441	0.130025	0.173469	0.158857	0.33	0.295881	0.16489	0.209173	0.360381	0.0641006	0.230769	0.0888889	0.166667
	0.133853	0.095266	0.0963199	0.10508	0.154411	0.144558	0.0893364	0.103333	0.107143	0.115852	0.0877193	0.113537	0.110704	0.121097	0.144043	0.138544	0.12624	0.214887	0.124101	0.21486	0.115742	0.142857	0.114754	0.219695	0.14223	0.153132	0.152231	0.177298	0.205761	0.129537	0.173077	0.157579	0.329883	0.294809	0.164654	0.206927	0.359773	0.0626703	0.210526	0.0869565	0.166667
	0.121408	0.0944236	0.0885201	0.102031	0.153972	0.142857	0.0863105	0.102997	0.104405	0.115242	0.0829694	0.11299	0.109756	0.120776	0.139939	0.134933	0.123008	0.202156	0.120853	0.206215	0.115298	0.137175	0.114072	0.216822	0.14159	0.151532	0.147843	0.174674	0.205701	0.128918	0.145695	0.15694	0.325121	0.285664	0.156997	0.203744	0.355145	0.0624607	0.204301	0.0858369	0.163636
	0.1199	0.0935252	0.085124	0.0979108	0.153017	0.141509	0.0852683	0.100933	0.103868	0.115203	0.0737282	0.109479	0.10882	0.120287	0.138508	0.132832	0.120512	0.183333	0.115068	0.205244	0.110747	0.136631	0.11341	0.215066	0.141504	0.148946	0.139322	0.173573	0.20339	0.127396	0.142857	0.156514	0.320095	0.283391	0.156691	0.203354	0.340299	0.0591813	0.200704	0.0851064	0.155172
	0.112336	0.0920323	0.0819535	0.0966113	0.152836	0.139601	0.0834598	0.100503	0.102948	0.105548	0.0731707	0.107692	0.107576	0.12	0.13324	0.129499	0.115018	0.174731	0.113043	0.205051	0.109411	0.135182	0.113355	0.214043	0.135157	0.146844	0.136497	0.173179	0.198208	0.124808	0.133175	0.146214	0.315043	0.282842	0.151261	0.195563	0.340247	0.0554634	0.2	0.0841121	0.155172
	0.104262	0.0918412	0.0803391	0.0961376	0.146355	0.135587	0.0827796	0.1	0.102889	0.102067	0.0711631	0.106944	0.106867	0.119318	0.124166	0.126545	0.112812	0.169755	0.112849	0.202895	0.108555	0.130428	0.113201	0.208657	0.131244	0.142236	0.136059	0.169763	0.197567	0.124016	0.115789	0.146185	0.314352	0.282122	0.15062	0.187184	0.337267	0.0540806	0.2	0.0833333	0.153846
	0.0988395	0.0892759	0.0796668	0.0957447	0.146208	0.135363	0.0802581	0.1	0.101861	0.101994	0.0705792	0.101664	0.105435	0.118782	0.122605	0.125604	0.111111	0.168944	0.111806	0.200091	0.108108	0.129032	0.108431	0.200549	0.131083	0.130254	0.135417	0.169317	0.194118	0.120051	0.107438	0.142857	0.306624	0.279568	0.14703	0.183121	0.328328	0.0508637	0.2	0.0833333	0.142857
	0.0879121	0.0887712	0.0758811	0.0948691	0.146126	0.129388	0.08	0.0975432	0.1	0.0980066	0.0689141	0.100917	0.102488	0.115966	0.12221	0.117643	0.111058	0.16875	0.109388	0.19791	0.107872	0.126151	0.108108	0.188997	0.127919	0.130165	0.135313	0.16931	0.194076	0.119644	0.103371	0.142646	0.299929	0.275862	0.145697	0.172066	0.323031	0.0502623	0.2	0.078481	0.142857
	0.0871437	0.0883921	0.0758082	0.0933768	0.144729	0.12773	0.0798825	0.0972222	0.1	0.0975147	0.0686764	0.100889	0.101299	0.115735	0.112927	0.107888	0.106548	0.16651	0.105814	0.180103	0.10735	0.124146	0.107604	0.186116	0.125452	0.128734	0.134424	0.169011	0.192119	0.118035	0.0803571	0.137829	0.297943	0.268557	0.144624	0.171573	0.319211	0.0491651	0.2	0.0758123	0.141975
	0.0839174	0.0879297	0.0727273	0.0912409	0.141829	0.120597	0.078125	0.0969255	0.0981612	0.096887	0.0686754	0.096179	0.0996527	0.112956	0.112213	0.102875	0.0987261	0.163883	0.105485	0.179509	0.103577	0.123941	0.106767	0.176305	0.124481	0.127362	0.129412	0.167508	0.190063	0.117647	0.0769231	0.136854	0.292331	0.26257	0.144474	0.169813	0.315955	0.0489691	0.185714	0.0729412	0.136364
	0.0826087	0.0861738	0.0714286	0.0851419	0.138211	0.119035	0.0776928	0.0967742	0.0917452	0.096831	0.0665299	0.0959596	0.0981623	0.111111	0.111641	0.0983678	0.0980132	0.157895	0.104784	0.174497	0.102338	0.12237	0.106714	0.175036	0.122363	0.125896	0.129363	0.165945	0.186706	0.114911	0.0666667	0.132382	0.285714	0.241379	0.141018	0.160699	0.313948	0.0485393	0.181818	0.0701754	0.136364
	0.0807848	0.0848708	0.0699301	0.0845393	0.138001	0.115758	0.0767875	0.0939661	0.0889328	0.0968173	0.0664378	0.0956325	0.0947431	0.111111	0.111111	0.0949121	0.0964215	0.155318	0.101952	0.166667	0.0994599	0.121936	0.104945	0.170717	0.121398	0.124597	0.127549	0.165686	0.183182	0.110563	0.058642	0.131421	0.277584	0.236267	0.131468	0.156455	0.306993	0.0483871	0.181452	0.0635593	0.134615
	0.0779014	0.0833862	0.0690932	0.0830914	0.132691	0.115643	0.0741957	0.0891743	0.0870187	0.0963594	0.0648968	0.0923077	0.0942998	0.108687	0.110214	0.0940856	0.0951294	0.15404	0.101693	0.16119	0.0989453	0.12069	0.103477	0.161743	0.120785	0.122065	0.125828	0.165424	0.183092	0.108657	0.0554963	0.130299	0.274137	0.22948	0.129486	0.153273	0.304143	0.0483693	0.166667	0.0634921	0.134146
	0.0778374	0.0827664	0.0690033	0.0797971	0.128537	0.113412	0.0732921	0.0877605	0.0821436	0.095941	0.0624614	0.0895507	0.0939015	0.108201	0.107841	0.0931832	0.0912863	0.151969	0.100252	0.160859	0.0973282	0.118848	0.101701	0.16092	0.116523	0.121512	0.125129	0.16	0.183061	0.106562	0.0384615	0.128539	0.27	0.225054	0.127896	0.150811	0.304044	0.0481314	0.166667	0.0555556	0.13
	0.0776864	0.080196	0.0683723	0.0761665	0.125604	0.112745	0.073075	0.086858	0.0800181	0.0959184	0.0621869	0.0880734	0.0897357	0.107587	0.107143	0.0930033	0.090412	0.151399	0.09929	0.160487	0.0966184	0.116822	0.101574	0.16	0.116088	0.118735	0.124954	0.15625	0.178803	0.100747	0.0383795	0.125411	0.261418	0.223102	0.117284	0.149476	0.302711	0.0474208	0.165049	0.0547264	0.125
	0.075983	0.0800539	0.0668228	0.0748461	0.123567	0.109493	0.0718248	0.0861106	0.0737816	0.0958454	0.0621749	0.0880503	0.0892417	0.106079	0.105147	0.0914634	0.0845455	0.150296	0.0958292	0.158932	0.0961538	0.11582	0.100674	0.147114	0.112726	0.117622	0.123642	0.155003	0.178416	0.0982143	0.0362319	0.125326	0.253012	0.221106	0.111111	0.147757	0.301636	0.0469984	0.162162	0.0535714	0.125
	0.0749133	0.0769651	0.0660691	0.0746542	0.12275	0.108014	0.0690108	0.0798844	0.0734659	0.0955725	0.0620488	0.0872151	0.0882145	0.103123	0.1	0.0912594	0.0825688	0.146552	0.0955809	0.151427	0.093755	0.115234	0.100463	0.141442	0.108418	0.113895	0.121964	0.151931	0.178092	0.0981197	0.0357143	0.123243	0.243243	0.217423	0.111111	0.147513	0.299255	0.046373	0.16	0.0520607	0.125
	0.0723915	0.0767604	0.0636704	0.0724971	0.116498	0.107904	0.0683843	0.07966	0.0729697	0.0920498	0.0615034	0.0839671	0.0867504	0.103069	0.0947784	0.0902789	0.0817656	0.143695	0.0952381	0.136707	0.0915636	0.113818	0.0998526	0.132576	0.106291	0.112475	0.120109	0.148276	0.176597	0.0945701	0.0357143	0.121773	0.230328	0.216363	0.110112	0.146838	0.297222	0.0459016	0.148571	0.0497866	0.122807
	0.0677732	0.0763628	0.0630631	0.0722107	0.112777	0.105799	0.0681703	0.0792183	0.0729433	0.0920263	0.0605898	0.0827673	0.0862674	0.0932094	0.0903035	0.089507	0.077812	0.142857	0.0952381	0.128415	0.0879651	0.113025	0.0998354	0.126509	0.104678	0.111671	0.119539	0.147059	0.175687	0.0934295	0.030303	0.120858	0.226205	0.20545	0.109554	0.146718	0.290566	0.0450696	0.142857	0.0482759	0.12
	0.0674758	0.0745543	0.061624	0.07173	0.107854	0.102576	0.0679275	0.0783433	0.0678128	0.0894917	0.0588381	0.0823005	0.0860292	0.0898726	0.084424	0.0886076	0.0777639	0.14232	0.0936346	0.128094	0.0871305	0.112075	0.0988361	0.123128	0.103252	0.110951	0.11897	0.141647	0.175097	0.0932155	0.029595	0.120837	0.214151	0.201108	0.109524	0.145707	0.285534	0.0447552	0.125	0.0477941	0.119048
	0.0674531	0.0734608	0.0603774	0.0715631	0.1	0.101475	0.0675235	0.0730212	0.0676082	0.0870016	0.0574684	0.0816095	0.0838287	0.088834	0.0841121	0.0886076	0.0772551	0.138643	0.0925926	0.125153	0.0837507	0.111771	0.098247	0.120018	0.0996255	0.103709	0.118706	0.139638	0.172702	0.090934	0.0285714	0.119865	0.197133	0.1872	0.109022	0.144684	0.282777	0.0432764	0.125	0.0471698	0.118182
	0.0602533	0.0726635	0.0593916	0.0714286	0.0992791	0.101445	0.0666667	0.0714402	0.0649351	0.0865553	0.0571429	0.0809061	0.08	0.0861492	0.0837072	0.0881057	0.0758294	0.136986	0.0893538	0.124292	0.0833333	0.110961	0.0955414	0.110865	0.0988283	0.103223	0.116105	0.135382	0.172131	0.0893391	0.0239651	0.119193	0.193548	0.184956	0.10831	0.143469	0.281977	0.0432517	0.117647	0.0454545	0.117647
	0.0599511	0.0724479	0.0593503	0.0701208	0.0973717	0.0967236	0.0652439	0.0706522	0.0637179	0.0836963	0.0569034	0.08	0.08	0.0860702	0.0833232	0.0869623	0.0752294	0.133089	0.0847458	0.123112	0.0815527	0.110953	0.09533	0.106563	0.0963222	0.102674	0.114869	0.128318	0.171717	0.0891309	0.0234742	0.118199	0.191663	0.181818	0.106579	0.143036	0.277778	0.042623	0.112903	0.0432692	0.115385
	0.0591265	0.0723764	0.0591716	0.0697674	0.0950805	0.0961098	0.0651143	0.0694014	0.0635492	0.0824742	0.0559056	0.0794678	0.0781568	0.0832888	0.0823339	0.0855863	0.0727273	0.128391	0.0833333	0.122745	0.0787022	0.109872	0.0949675	0.106383	0.0958549	0.1	0.113902	0.123552	0.170323	0.0889953	0.0227273	0.11802	0.187378	0.177708	0.105191	0.142781	0.272727	0.0423818	0.105263	0.042042	0.111111
	0.059031	0.0703925	0.0583396	0.0635306	0.093819	0.0952846	0.0642202	0.0682116	0.0634441	0.0815865	0.0551836	0.0786517	0.0769231	0.0829052	0.0807453	0.0848909	0.0724971	0.127752	0.083068	0.119125	0.0784314	0.109548	0.0946841	0.100463	0.0952239	0.0995537	0.109612	0.119095	0.164553	0.0887603	0.0212766	0.117516	0.186261	0.177378	0.104885	0.142155	0.25443	0.0423789	0.1	0.0416667	0.111111
	0.0585171	0.0691005	0.0551812	0.0630422	0.0935673	0.0949808	0.0641955	0.0654754	0.0627197	0.0810811	0.0551425	0.0774401	0.075339	0.0821918	0.0791541	0.0819261	0.0712603	0.118612	0.0828511	0.115495	0.0774095	0.10728	0.093617	0.088811	0.0910683	0.0990615	0.109328	0.118343	0.148459	0.0876078	0.0208333	0.116312	0.181291	0.174448	0.1031	0.140619	0.250743	0.041728	0.1	0.0415755	0.111111
	0.057971	0.0688385	0.0545765	0.0622606	0.0858427	0.0946844	0.0625689	0.0652929	0.0626732	0.0810587	0.0548284	0.076824	0.0740321	0.0816302	0.0771829	0.081484	0.0712112	0.117622	0.0826389	0.103552	0.0769231	0.10655	0.0919107	0.0870021	0.0905318	0.098643	0.108045	0.115372	0.147535	0.0867993	0.0207305	0.114717	0.177877	0.172414	0.102661	0.140232	0.250622	0.0412833	0.0902256	0.0410959	0.111111
	0.0576533	0.0636771	0.0527444	0.0619359	0.0833333	0.0915679	0.0611209	0.0642807	0.0608407	0.0766548	0.0547468	0.0764399	0.0731707	0.0763547	0.0753647	0.0805078	0.0709677	0.117002	0.0782681	0.100939	0.0754372	0.106452	0.0909091	0.0865935	0.0890995	0.0985206	0.108033	0.114757	0.147147	0.0866118	0.0204082	0.114692	0.16129	0.161392	0.0991222	0.138889	0.250269	0.0395334	0.0774194	0.0392857	0.111111
	0.0570931	0.0636421	0.0524239	0.0618701	0.080708	0.0891039	0.0608436	0.0629534	0.0608381	0.0764127	0.0544747	0.0756671	0.0705065	0.0754717	0.0752297	0.0792683	0.070202	0.114983	0.0774908	0.100495	0.0734585	0.103011	0.0904059	0.0864198	0.0873519	0.0932642	0.107609	0.111111	0.144148	0.0858947	0.0181818	0.113294	0.159214	0.154571	0.0939411	0.137568	0.245161	0.0390942	0.0702703	0.0392523	0.111111
	0.0567139	0.0634434	0.051937	0.0615328	0.0792475	0.0886584	0.0606785	0.0628931	0.0603497	0.0755758	0.0537634	0.0734069	0.0697674	0.0753956	0.0750796	0.0782383	0.0687112	0.113746	0.0742986	0.0971723	0.0730164	0.100902	0.0900901	0.0851064	0.087288	0.0890976	0.106767	0.107383	0.142915	0.0857229	0.0181818	0.11075	0.15818	0.151261	0.0929235	0.137432	0.241477	0.038476	0.0693069	0.035461	0.111111
	0.0566873	0.0627382	0.0492034	0.0601835	0.078643	0.0861538	0.0588235	0.0625	0.0601029	0.075	0.0526316	0.0733303	0.0690604	0.0746844	0.0743802	0.0777122	0.0666067	0.112276	0.074184	0.0959013	0.072952	0.100224	0.0899383	0.0844206	0.0870787	0.0827852	0.102702	0.105161	0.142056	0.0838998	0.018018	0.110536	0.157895	0.150958	0.0900701	0.137106	0.237482	0.0374342	0.0677966	0.0353535	0.1
	0.0554769	0.0603301	0.0489418	0.0584168	0.0781668	0.0857918	0.0585029	0.0620367	0.0590802	0.074068	0.0523197	0.071728	0.066263	0.0737606	0.0728682	0.0775574	0.0653246	0.104491	0.0733615	0.0948617	0.0712836	0.100162	0.0869117	0.0816327	0.087037	0.0825243	0.102505	0.103756	0.139205	0.0834584	0.0178571	0.110458	0.151998	0.150334	0.0891497	0.136209	0.222222	0.03698	0.0666667	0.0353535	0.1
	0.0551491	0.0593777	0.04876	0.0583647	0.0778653	0.0849698	0.0584795	0.0618178	0.0577314	0.0699385	0.0516866	0.0708308	0.0657895	0.0734235	0.0728366	0.0775324	0.0646678	0.102351	0.0732984	0.0910913	0.0692098	0.100095	0.0863868	0.0793651	0.0846945	0.0796642	0.101335	0.10219	0.138421	0.083202	0.0175439	0.110054	0.145605	0.143057	0.0879249	0.132842	0.196328	0.0355987	0.0625	0.0352941	0.1
	0.0535887	0.0585011	0.0478219	0.057591	0.0768565	0.0844871	0.0583746	0.0615809	0.0574614	0.0693069	0.0513771	0.069288	0.0631438	0.073329	0.0728282	0.0769231	0.0641593	0.100777	0.0729626	0.0909091	0.0689278	0.0994764	0.0862559	0.0765199	0.0835946	0.0794853	0.101298	0.100494	0.136364	0.0829681	0.016	0.109409	0.140776	0.133333	0.084286	0.132197	0.169231	0.0353403	0.0606061	0.0347826	0.1
	0.0524823	0.0575022	0.047786	0.0570276	0.076403	0.0844622	0.0570031	0.0612245	0.0571429	0.0693043	0.0509206	0.0680507	0.0613233	0.0732775	0.0725109	0.0766733	0.0636704	0.0990991	0.0716707	0.0899888	0.0671493	0.0985019	0.084855	0.075	0.0810811	0.0793942	0.100665	0.0948852	0.135689	0.0825917	0.0151515	0.108199	0.140426	0.129625	0.0789474	0.127035	0.162628	0.0352513	0.0588235	0.0346021	0.1
	0.0510321	0.0568636	0.0477208	0.0567964	0.0754502	0.0843028	0.0565396	0.0591549	0.0571429	0.0689104	0.0502416	0.067557	0.061284	0.0728291	0.0704308	0.0764361	0.0631692	0.0981308	0.0709494	0.0898734	0.06607	0.0973085	0.0844081	0.071805	0.0779944	0.0760032	0.100151	0.094524	0.128985	0.0811416	0.0140845	0.106418	0.139449	0.12944	0.0769231	0.126984	0.159909	0.0347032	0.0588235	0.0338346	0.1
	0.0510269	0.0567214	0.047619	0.0544469	0.0748863	0.084	0.0560583	0.0583078	0.0555556	0.0681818	0.0484513	0.0635035	0.0595068	0.0727142	0.0698934	0.0730684	0.0630048	0.0958642	0.0703918	0.0871166	0.0653951	0.0968208	0.0839586	0.0711754	0.0776064	0.0753516	0.0916807	0.0925977	0.119782	0.0807927	0.0138889	0.105968	0.136719	0.123547	0.0741632	0.124617	0.159511	0.0346883	0.0560748	0.0337838	0.0983607
	0.0504355	0.055454	0.0473205	0.053993	0.0745468	0.0839494	0.0548061	0.0573877	0.0544218	0.0674232	0.0482625	0.0631068	0.0585745	0.0723485	0.0683396	0.0723696	0.0626186	0.093969	0.0702835	0.0839874	0.0645477	0.0963047	0.0833333	0.0688627	0.0765011	0.0752521	0.0912409	0.0902141	0.116833	0.0800681	0.0138889	0.105263	0.13264	0.118191	0.0741193	0.123815	0.156863	0.0336826	0.0555556	0.0330579	0.0972222
	0.050405	0.0537821	0.0471698	0.0539102	0.0720978	0.0816327	0.0543541	0.0572485	0.0539724	0.0663926	0.0479278	0.0625	0.0583883	0.0722892	0.0673505	0.0702503	0.0625	0.0915599	0.0671343	0.077551	0.0637507	0.0959159	0.0832749	0.067731	0.076225	0.0744222	0.0909758	0.0889996	0.112059	0.0776699	0.0136986	0.105128	0.125276	0.117021	0.0735786	0.122378	0.14966	0.0336634	0.0555556	0.0326531	0.0909091
	0.0497196	0.0504732	0.0463331	0.0536869	0.0716049	0.0787286	0.0541345	0.056338	0.0530053	0.0650473	0.0475228	0.0625	0.0567075	0.0706011	0.0668158	0.0693085	0.0609822	0.0903708	0.0664576	0.0722444	0.0635498	0.0958904	0.080847	0.0658858	0.0752176	0.0698842	0.0909586	0.0881812	0.107056	0.0775348	0.012987	0.104579	0.12318	0.116437	0.0714286	0.12218	0.136364	0.0335679	0.0482759	0.0324575	0.0860215
	0.0490756	0.0504587	0.0454545	0.05322	0.0711888	0.0786517	0.0526316	0.0560373	0.0526629	0.0650138	0.0454545	0.0607379	0.0547243	0.0695847	0.066738	0.0692617	0.06	0.0886347	0.0662461	0.0714286	0.0629655	0.0935252	0.0808179	0.0658316	0.0737753	0.0689972	0.0907643	0.0875856	0.104938	0.0771199	0.012987	0.10444	0.121939	0.113751	0.070659	0.120317	0.135266	0.0330426	0.047619	0.03125	0.0833333
	0.048	0.0497974	0.0452385	0.0526459	0.0690005	0.0769231	0.0516355	0.0560277	0.0525468	0.0641272	0.0454545	0.0601255	0.0545906	0.0660377	0.0644211	0.0682123	0.0588803	0.0881502	0.0658311	0.070464	0.062522	0.0931987	0.0803314	0.0639606	0.0734581	0.0685678	0.0886844	0.0869904	0.10271	0.0767263	0.0128205	0.10404	0.118866	0.107212	0.0682755	0.118446	0.13125	0.0328317	0.047619	0.03125	0.0833333
	0.0479233	0.049505	0.0443892	0.0523794	0.0687763	0.0712865	0.051559	0.0550459	0.0525253	0.0629274	0.0454545	0.0601112	0.054553	0.0651026	0.0635209	0.0681818	0.0579167	0.0877587	0.0653649	0.07	0.0625	0.0926106	0.0801656	0.062201	0.0730117	0.0684932	0.0875	0.0855159	0.101587	0.0764582	0.0126582	0.103869	0.118715	0.102873	0.0680437	0.115136	0.128936	0.0326583	0.0454545	0.0311284	0.0776699
	0.046971	0.0495035	0.0434783	0.0516432	0.0685108	0.0697959	0.0512821	0.0543058	0.0514534	0.0606415	0.0449886	0.0598227	0.0542501	0.0643111	0.0616405	0.0673282	0.0578279	0.0870744	0.0653624	0.0690236	0.0624738	0.09059	0.0792079	0.0614473	0.0719435	0.0680346	0.0874891	0.0778531	0.0937333	0.0749267	0.0123457	0.103508	0.114645	0.102193	0.0680423	0.114017	0.105428	0.0318119	0.0454545	0.0307018	0.0769231
	0.0469592	0.0494164	0.0431566	0.0511096	0.0675	0.0684601	0.0502593	0.0528519	0.0513308	0.0604625	0.044764	0.0591862	0.0541086	0.0638298	0.0611213	0.0669656	0.0567308	0.0856656	0.0651405	0.0678175	0.0620237	0.0890388	0.0775925	0.06121	0.0710498	0.0669417	0.0872937	0.0709996	0.0922578	0.0738397	0.0121951	0.103456	0.111351	0.0999871	0.067641	0.11366	0.103435	0.0317965	0.043956	0.0306122	0.0769231
	0.0465658	0.0479727	0.0425	0.0501107	0.0664948	0.0663178	0.0499494	0.0523357	0.0512738	0.0601493	0.043941	0.0588525	0.0536361	0.0638151	0.0609756	0.0661667	0.056703	0.0854701	0.0645208	0.0674157	0.0606838	0.08849	0.0762432	0.0601101	0.0708643	0.0660377	0.0863636	0.0691871	0.0918394	0.0728707	0.0118577	0.10314	0.110757	0.0983736	0.0674256	0.112419	0.101963	0.0317919	0.0434783	0.0304878	0.0727273
	0.0462824	0.0463038	0.0418301	0.049753	0.0661157	0.0657026	0.0484472	0.0520231	0.0507099	0.0594796	0.0438526	0.0588235	0.0526316	0.0634921	0.0606061	0.0658281	0.0562852	0.0825065	0.0644396	0.0672303	0.0605176	0.0876033	0.0762053	0.057971	0.0704556	0.0658579	0.0863047	0.0681383	0.0916996	0.0721562	0.0117647	0.10267	0.109091	0.0974666	0.0666831	0.110429	0.0965552	0.0310893	0.0416667	0.0304183	0.0714286
	0.0459163	0.0461606	0.0411652	0.0497137	0.065932	0.0654136	0.048439	0.0515612	0.0483245	0.057971	0.04383	0.0580205	0.0522706	0.0628777	0.0604504	0.0656323	0.0559284	0.0823324	0.0642499	0.0669735	0.0599687	0.0851256	0.0750181	0.0555649	0.0652958	0.0655941	0.0851274	0.0669546	0.0911928	0.0720954	0.0116279	0.102608	0.107923	0.0941394	0.0658548	0.109639	0.0965177	0.0310398	0.0416667	0.030303	0.0714286
	0.0442353	0.046024	0.0410521	0.0493338	0.06548	0.0645759	0.0477147	0.0505473	0.0464502	0.0574644	0.0429185	0.0576923	0.0521127	0.0620734	0.0603631	0.0652819	0.0556174	0.0802034	0.0628462	0.0623036	0.0582656	0.0850117	0.0742942	0.0552147	0.0647572	0.0655264	0.0847613	0.0665217	0.0910704	0.0713306	0.0114943	0.102564	0.107207	0.0910637	0.0652565	0.109503	0.0963607	0.030684	0.04	0.030303	0.0701754
	0.0442094	0.0445754	0.0408163	0.0486111	0.0618144	0.063625	0.0472606	0.05	0.0461538	0.0571999	0.0427952	0.0564011	0.0515464	0.0617545	0.0600486	0.0650547	0.0547402	0.0790816	0.0626242	0.0617419	0.0581407	0.0846192	0.0720921	0.0532775	0.0644491	0.0646053	0.0842029	0.0663058	0.0909091	0.0707665	0.0113636	0.102533	0.104437	0.0888031	0.0647459	0.10927	0.0952381	0.0305635	0.04	0.0300752	0.0684932
	0.0438891	0.0441014	0.0404457	0.048477	0.0607796	0.0634921	0.0472464	0.0499469	0.0455581	0.0571429	0.0424528	0.0561798	0.0512979	0.0617441	0.0597166	0.0633721	0.0547183	0.0784816	0.0624851	0.060241	0.0573066	0.0844472	0.0687171	0.0529891	0.0630915	0.0642647	0.0828941	0.0657534	0.0905588	0.0690454	0.010929	0.102285	0.103775	0.0874479	0.0642055	0.10748	0.0949423	0.0304193	0.0399061	0.0298507	0.0681818
	0.0436203	0.0439785	0.040014	0.0481728	0.0590924	0.062653	0.0457976	0.0493421	0.0449638	0.0566836	0.0424286	0.0539468	0.0505051	0.0593863	0.0593838	0.0627461	0.0544872	0.0784314	0.0624432	0.0589862	0.0566558	0.0840805	0.0667373	0.0498992	0.0620123	0.0633619	0.0825259	0.06507	0.0891256	0.0678934	0.0108696	0.101897	0.100186	0.0857143	0.063809	0.106383	0.0933879	0.0300261	0.0384615	0.029703	0.0674157
	0.0431884	0.0435025	0.04	0.0479907	0.0566667	0.0625	0.0452738	0.0489784	0.0447994	0.0564977	0.0421666	0.053943	0.0498382	0.0585106	0.0588235	0.0612275	0.0544629	0.0783699	0.0608415	0.0588235	0.0557805	0.0821918	0.0650407	0.0494985	0.0616562	0.062052	0.0804581	0.063602	0.0884354	0.0660592	0.0108696	0.0993789	0.100064	0.0851551	0.0620452	0.106231	0.0930831	0.0296893	0.0384615	0.029703	0.0669856
	0.0429461	0.0433239	0.0397405	0.0479776	0.0564516	0.0617006	0.0442206	0.0481566	0.0440119	0.0553892	0.0411673	0.0515209	0.0491803	0.0581869	0.058373	0.0606061	0.0525021	0.0778415	0.0608024	0.057971	0.0557173	0.0819672	0.0649632	0.0493638	0.0613254	0.0609716	0.0798504	0.0622878	0.0849011	0.0654355	0.0107527	0.0993506	0.0985533	0.0833333	0.0619093	0.104058	0.0906619	0.0294743	0.0377358	0.0291262	0.0666667
	0.042886	0.0432057	0.0393992	0.047854	0.056391	0.0606478	0.0441937	0.0475311	0.0435784	0.0544017	0.0410318	0.0514792	0.0481862	0.0580848	0.0583296	0.0588235	0.0520114	0.0760999	0.0606751	0.0578098	0.0551154	0.0783071	0.0611222	0.0488648	0.060422	0.0576502	0.077989	0.0619048	0.0844992	0.0650983	0.0106383	0.0977979	0.0970149	0.0827018	0.0610329	0.10176	0.0894407	0.0293902	0.037037	0.0287671	0.0660793
	0.0428008	0.0428571	0.0391619	0.0474566	0.0554475	0.0587614	0.043956	0.0463135	0.0432261	0.0541741	0.0401949	0.0511915	0.0469223	0.0576677	0.0574971	0.0587061	0.0518868	0.0753496	0.0599731	0.0561798	0.0548136	0.0763511	0.061067	0.0485437	0.0596941	0.056987	0.0774194	0.0614152	0.0843871	0.0648987	0.0105263	0.0976431	0.096707	0.0822903	0.0606742	0.10101	0.0879637	0.0291767	0.0369515	0.0285714	0.0645161
	0.0424444	0.0425989	0.037478	0.0463245	0.0548296	0.0563241	0.0436803	0.0462561	0.040388	0.0538271	0.0393798	0.0508072	0.0462963	0.0576484	0.0574105	0.0586974	0.0517578	0.0748426	0.0599101	0.0559199	0.0526195	0.0709572	0.0609123	0.0475188	0.0594001	0.0560334	0.0759625	0.0606607	0.0835214	0.0647523	0.0104167	0.0968547	0.0924387	0.081363	0.0602041	0.0999175	0.0874099	0.0291055	0.0357143	0.0284281	0.0625
	0.0423512	0.0423325	0.0373281	0.0462904	0.0546963	0.0554137	0.0434783	0.0460169	0.0394124	0.0537634	0.0390574	0.0497254	0.0461538	0.0557925	0.0561131	0.0579109	0.0515798	0.0740516	0.0592922	0.0555556	0.0512821	0.0693717	0.0601467	0.0472441	0.05827	0.0555556	0.0740741	0.0596391	0.0833333	0.0645161	0.0104167	0.0960682	0.0911458	0.081157	0.059344	0.0989691	0.087103	0.028754	0.0330579	0.0282828	0.0625
	0.0421074	0.0422985	0.0368078	0.0461501	0.0546819	0.055305	0.0433437	0.0459614	0.0394053	0.0524807	0.0389762	0.0491453	0.0452512	0.05482	0.0560363	0.0572399	0.0510145	0.0738355	0.0590346	0.0546218	0.051068	0.0681106	0.0582937	0.0470942	0.0581605	0.0508287	0.0736653	0.0594321	0.0833333	0.0644942	0.0103093	0.0955264	0.0902377	0.0806265	0.0591747	0.0960674	0.0842	0.0285349	0.0322581	0.0272109	0.0625
	0.0419436	0.0422448	0.0367021	0.0454545	0.0543719	0.0552394	0.0430931	0.0458385	0.0392241	0.0521042	0.0386013	0.0491201	0.0448761	0.0542746	0.0556516	0.0566615	0.0499391	0.0737297	0.0565796	0.0527293	0.0508623	0.0656512	0.0570476	0.0465527	0.0575011	0.0496389	0.0729842	0.0586122	0.0833333	0.064058	0.00970874	0.0952381	0.0876543	0.0793988	0.0588235	0.0934369	0.08203	0.0277027	0.0322581	0.0271318	0.0625
	0.0419232	0.0418567	0.0354394	0.0444356	0.0534962	0.0547712	0.0425107	0.0458306	0.0392157	0.0514561	0.0382166	0.0487064	0.0436187	0.0541147	0.0553506	0.0559878	0.049239	0.0726749	0.0556845	0.0521634	0.0508107	0.0652466	0.0561008	0.0454545	0.0568239	0.048913	0.0729673	0.0582046	0.0814725	0.063968	0.00943396	0.0952135	0.0874404	0.0785146	0.0582634	0.091458	0.0803988	0.0274981	0.0322581	0.0268199	0.0608696
	0.0417207	0.0415972	0.0353516	0.044051	0.0526316	0.0547619	0.0423713	0.0455106	0.0384615	0.0506329	0.0376409	0.0481833	0.0434634	0.0538509	0.0544947	0.0559547	0.0488656	0.0714286	0.0556444	0.0516217	0.0505837	0.065206	0.0556875	0.044614	0.0566038	0.0481997	0.0728436	0.0577697	0.0801987	0.0639504	0.00943396	0.0945946	0.0871441	0.0774751	0.0573038	0.0913626	0.0798452	0.0268628	0.03125	0.0267686	0.0588235
	0.0413493	0.0415556	0.0352909	0.043514	0.0514193	0.0539187	0.0418354	0.0452759	0.0378754	0.0506329	0.0373186	0.0480874	0.0412256	0.0532514	0.0536406	0.0558721	0.0484918	0.0714007	0.0549415	0.0513834	0.05	0.0634921	0.0554643	0.0445545	0.0565824	0.0473131	0.0725307	0.0576522	0.08	0.0636797	0.00925926	0.0937937	0.0828937	0.0768755	0.0570768	0.0883987	0.0797814	0.0267857	0.03125	0.0263397	0.0588235
	0.0410749	0.0414502	0.0351419	0.0434425	0.050799	0.053423	0.0416667	0.0436463	0.0376588	0.0506041	0.0373134	0.047619	0.039392	0.053044	0.0531784	0.0553047	0.0478215	0.0706735	0.0547945	0.050829	0.0488057	0.06298	0.0550918	0.0439895	0.0563467	0.0447375	0.071772	0.0557951	0.0788906	0.0627581	0.00921659	0.0930916	0.0823637	0.0763312	0.0567309	0.0871471	0.0778506	0.026699	0.0277778	0.0260417	0.0588235
	0.0410095	0.0414201	0.0349374	0.0433944	0.0499697	0.0512821	0.041184	0.043583	0.037415	0.0498675	0.0367135	0.0475372	0.0388564	0.0526389	0.0528153	0.0550972	0.0476552	0.0702654	0.0542504	0.0498255	0.0485729	0.0623645	0.0549451	0.0397269	0.0562483	0.0447154	0.0716566	0.0548381	0.0749825	0.062596	0.00904977	0.0917266	0.0797296	0.0756669	0.0553993	0.086708	0.0769612	0.0266805	0.0275229	0.0257732	0.0555556
	0.0407862	0.041042	0.0342679	0.043038	0.048866	0.0509831	0.0409357	0.0434481	0.0369718	0.0462939	0.0366972	0.046875	0.0385005	0.0521739	0.0528083	0.0546946	0.0469208	0.0701053	0.0535077	0.049652	0.0485185	0.0620242	0.0546563	0.0394847	0.0559869	0.0446978	0.0715159	0.052539	0.0723629	0.0624598	0.00892857	0.0916679	0.0791162	0.0735338	0.0553335	0.0862069	0.0756201	0.026643	0.0254237	0.025641	0.0555556
	0.0405797	0.0409768	0.0340909	0.0423077	0.0476801	0.0503145	0.0407996	0.0429253	0.0364598	0.0460235	0.0363511	0.0459816	0.0384615	0.0520581	0.0526316	0.0537055	0.0466073	0.0696402	0.0533333	0.0484327	0.0475963	0.0605065	0.0544759	0.0393821	0.0559548	0.044024	0.0712985	0.0522088	0.0720268	0.0617284	0.00892857	0.0915046	0.0790281	0.0732666	0.0550825	0.0851064	0.0736668	0.0262118	0.025	0.0248447	0.0555556
	0.0404167	0.0408891	0.033733	0.0421138	0.0472631	0.0501647	0.0407752	0.0427163	0.0357143	0.0460015	0.035773	0.0455725	0.0377358	0.0507572	0.0513667	0.0536307	0.0464135	0.0692762	0.0526316	0.0472871	0.0474453	0.0602515	0.0544378	0.0392578	0.0558739	0.0437601	0.0704031	0.0509939	0.0719603	0.0614968	0.00892857	0.0899668	0.0779463	0.0729898	0.0550055	0.0844116	0.0727756	0.0260605	0.025	0.0247253	0.0543478
	0.0403152	0.04047	0.0333969	0.0409498	0.0472272	0.05	0.0403741	0.0422444	0.0353982	0.0456927	0.0354142	0.0454545	0.037546	0.0484441	0.0512821	0.0533461	0.0461538	0.0676719	0.0524297	0.0470588	0.0465116	0.0588235	0.053649	0.0380137	0.0542872	0.0434311	0.0691663	0.0506274	0.0717213	0.0609083	0.00892857	0.0899576	0.0769231	0.0723227	0.0533313	0.0841468	0.0725256	0.025815	0.0212766	0.0239726	0.0526316
	0.0401235	0.040465	0.0333932	0.0407158	0.0469854	0.0498688	0.0403635	0.0418177	0.0352655	0.0454545	0.0354117	0.0449219	0.0372147	0.0484182	0.0508607	0.0533333	0.0459184	0.0673851	0.0522897	0.0464097	0.0464444	0.0582998	0.0525775	0.0379015	0.0537889	0.0430236	0.0691273	0.0498818	0.0709549	0.0601734	0.00884956	0.0898536	0.0747036	0.0705314	0.0532567	0.0829579	0.0720961	0.0257143	0.0204082	0.023753	0.0526316
	0.0400962	0.0402988	0.0325657	0.0403186	0.0447979	0.0496621	0.0402253	0.0416667	0.0352629	0.0450751	0.0353881	0.0445192	0.0370652	0.0483207	0.0499287	0.0509755	0.0457516	0.0667752	0.0516432	0.0461148	0.0463107	0.0577406	0.052283	0.0376072	0.0512776	0.042621	0.0690985	0.0483554	0.0699088	0.0596047	0.00869565	0.0894309	0.0746257	0.0699119	0.0526316	0.0816038	0.071625	0.0257133	0.0204082	0.0237389	0.0526316
	0.0385917	0.0401977	0.0324347	0.0400922	0.0443815	0.0492385	0.0397204	0.0412254	0.0351124	0.0440863	0.0348837	0.0444221	0.037037	0.0479985	0.0493274	0.050915	0.0449438	0.0662252	0.0515536	0.0460216	0.0458716	0.0571429	0.0518791	0.0358472	0.0500659	0.0415184	0.0687104	0.0477838	0.0691754	0.0592021	0.00869565	0.0883451	0.072327	0.0689655	0.0518777	0.08	0.0688951	0.025601	0.0204082	0.0235294	0.0512821
	0.0384061	0.0389814	0.0321364	0.0393637	0.0441512	0.048693	0.0390828	0.0409421	0.0344828	0.0424499	0.0347267	0.0444092	0.0366364	0.047947	0.0489607	0.0491391	0.0445795	0.0661035	0.0512066	0.0454545	0.0451362	0.0569531	0.0517362	0.0351362	0.0498301	0.0411996	0.0669652	0.0474355	0.0683371	0.0587776	0.00863931	0.0883291	0.0696853	0.068475	0.0508306	0.0776545	0.0683673	0.0253807	0.0196078	0.0229508	0.05
	0.0381715	0.038651	0.0320843	0.039132	0.0436589	0.0480746	0.0388286	0.0408915	0.0344654	0.0417778	0.0341136	0.042623	0.0363333	0.0478036	0.0483026	0.0490242	0.0439234	0.0651587	0.050388	0.0452639	0.044795	0.0555556	0.0516117	0.0346644	0.0495248	0.0411272	0.0651893	0.046201	0.0678098	0.0578132	0.00854701	0.0881311	0.0696203	0.0681606	0.049059	0.0764103	0.068128	0.0253779	0.0196078	0.0224719	0.05
	0.0380282	0.0381433	0.0319374	0.0389184	0.0432223	0.0478622	0.0377871	0.0399572	0.0341851	0.0414557	0.0340641	0.0425266	0.0362992	0.0476559	0.0479855	0.0489683	0.0436681	0.063399	0.049546	0.0448276	0.0444021	0.0555556	0.0512821	0.0338763	0.0493324	0.0401196	0.0646872	0.0460731	0.0670807	0.0572608	0.00843882	0.0872318	0.0669811	0.067657	0.048461	0.0729498	0.0648464	0.0252926	0.0178571	0.0223881	0.05
	0.037859	0.0381135	0.0318323	0.0388568	0.0430392	0.047619	0.0373134	0.0397351	0.033978	0.0412507	0.0339378	0.0421348	0.0360256	0.0470751	0.047619	0.0480576	0.0434783	0.0628378	0.0478859	0.044154	0.0439499	0.0555506	0.0506476	0.0329902	0.0490585	0.0398837	0.064037	0.0456102	0.0666667	0.0568777	0.00833333	0.086757	0.0638064	0.0673826	0.047619	0.0714286	0.0645161	0.0252577	0.0178571	0.0218978	0.0487805
	0.0376812	0.0374294	0.0317914	0.0374163	0.0426174	0.047619	0.0372953	0.0395952	0.0336281	0.0410959	0.0335289	0.0415718	0.0359331	0.0470003	0.0472779	0.0476826	0.0427184	0.062342	0.0476824	0.0429822	0.0438819	0.0554949	0.0506026	0.0320641	0.048254	0.0398614	0.0622534	0.0449711	0.0650369	0.0559829	0.00833333	0.0851237	0.063623	0.0673582	0.0473506	0.0707692	0.0627421	0.0252265	0.0175439	0.0210526	0.0487805
	0.0376737	0.0373173	0.0314961	0.0373593	0.042297	0.047619	0.037037	0.0394777	0.0333733	0.0402089	0.0334066	0.0414352	0.0354325	0.0464904	0.047106	0.0462963	0.0424837	0.0622375	0.047619	0.0424036	0.0437895	0.0536398	0.0501515	0.031994	0.0480433	0.0394575	0.0620669	0.0447234	0.0647482	0.0559265	0.00833333	0.0848244	0.0633484	0.0670391	0.046495	0.0701428	0.0625	0.0249473	0.0172414	0.0210084	0.047619
	0.0370923	0.0371655	0.0314762	0.0372055	0.0421155	0.0475443	0.0368852	0.0394769	0.0333333	0.0394163	0.0329756	0.0410656	0.0352619	0.0457895	0.0454545	0.0461538	0.0424107	0.0617569	0.0470607	0.0416667	0.0434783	0.0533471	0.0497455	0.0310727	0.0470183	0.0393079	0.0615183	0.0446979	0.0638298	0.0554861	0.00829876	0.084294	0.060262	0.0665434	0.0464824	0.0687873	0.0615385	0.0249267	0.015873	0.0207792	0.047619
	0.0370732	0.037138	0.0311396	0.0359886	0.0418233	0.0462963	0.0364583	0.0392857	0.033264	0.0387984	0.0323741	0.0410172	0.0352467	0.0448056	0.0450233	0.0459559	0.0423525	0.0597709	0.0464995	0.0415301	0.0434109	0.0465215	0.0491459	0.0309598	0.0469697	0.0390654	0.0613273	0.0446523	0.0630535	0.0548026	0.00813008	0.0842697	0.0600375	0.0637363	0.0464756	0.0667799	0.0576951	0.0248977	0.015625	0.0207715	0.0454545
	0.0364011	0.0369762	0.0307243	0.0359873	0.0416127	0.0462963	0.0361446	0.0392621	0.0327869	0.0384615	0.0322643	0.0409849	0.0350877	0.0446602	0.0447619	0.0454545	0.04209	0.0597325	0.045542	0.0405161	0.042689	0.0454545	0.0490482	0.030853	0.0469622	0.0385919	0.0612385	0.0436242	0.0627184	0.0543434	0.00813008	0.0841937	0.058205	0.0630317	0.0457223	0.0657931	0.0542868	0.0240427	0.015625	0.0207254	0.0454545
	0.0362635	0.036559	0.0306776	0.035978	0.0413126	0.0457508	0.0357721	0.0391061	0.0326947	0.0384615	0.0322431	0.0404359	0.0350877	0.0446019	0.04463	0.0443641	0.0417163	0.0595238	0.0452284	0.04	0.0420481	0.0454545	0.0484922	0.0308351	0.0466267	0.0384152	0.0609671	0.0431198	0.0625	0.0541654	0.00813008	0.0838323	0.0576582	0.0605973	0.0454545	0.0656036	0.0529557	0.0240417	0.015625	0.0206612	0.0454545
	0.0360656	0.0365554	0.0306748	0.0357043	0.0410361	0.0455985	0.0357143	0.0389885	0.0319149	0.0381579	0.0319171	0.0398078	0.0348606	0.0442026	0.0444444	0.0441176	0.0415611	0.0592039	0.0449257	0.039646	0.0404531	0.0432893	0.0483051	0.0301459	0.0460751	0.0382105	0.0609584	0.0424919	0.062042	0.0539613	0.00806452	0.0832296	0.0576437	0.06	0.0453303	0.0653145	0.0527197	0.0239211	0.0153846	0.0204604	0.0434783
	0.0349278	0.0360015	0.0305441	0.0355662	0.0407064	0.0453012	0.0353499	0.038961	0.0317555	0.0379747	0.0317263	0.0392549	0.0348517	0.0433875	0.0443686	0.0438596	0.0414317	0.0590183	0.0449162	0.0394474	0.039951	0.0424631	0.048124	0.0301429	0.0452806	0.0381232	0.059593	0.0424649	0.0619977	0.0534096	0.00806452	0.0827033	0.0574858	0.0588235	0.0451934	0.0648755	0.0525836	0.0235294	0.0153846	0.020339	0.0434783
	0.0348056	0.0357377	0.0302292	0.0354367	0.040412	0.0449438	0.0351267	0.0387795	0.0313351	0.0376093	0.0316967	0.0391061	0.0348304	0.0429981	0.042686	0.0435783	0.0410831	0.0589971	0.0446429	0.0386806	0.0398915	0.0423892	0.0475423	0.0300783	0.0450729	0.037963	0.0595126	0.0406639	0.0614319	0.053017	0.008	0.0794949	0.0561941	0.0588235	0.044927	0.0641364	0.0519774	0.0232673	0.0153846	0.020202	0.0434783
	0.0348015	0.0356798	0.0302198	0.0353951	0.0401575	0.0447761	0.0351053	0.0387438	0.0311123	0.0369733	0.031678	0.038961	0.0347884	0.042512	0.0421068	0.0434783	0.040783	0.0588235	0.04408	0.0384615	0.0397687	0.0416667	0.0474367	0.0299459	0.0447088	0.0379383	0.0588235	0.0406632	0.0608871	0.0527665	0.00793651	0.0788985	0.0546651	0.057215	0.044631	0.0626598	0.0517553	0.0232446	0.0147059	0.0196078	0.0416667
	0.0347546	0.0354059	0.0302034	0.0352941	0.039364	0.0441176	0.0351035	0.038623	0.0301394	0.0368345	0.0311041	0.0385783	0.034188	0.0424809	0.0407288	0.0430936	0.0402655	0.0581395	0.0438706	0.0384615	0.0393162	0.041507	0.047433	0.0299098	0.0446533	0.037744	0.0571749	0.0405495	0.0606061	0.0527151	0.00793651	0.0786843	0.0545455	0.0565371	0.0436893	0.0614799	0.0514604	0.0230534	0.0147059	0.019544	0.0416667
	0.0343434	0.0353898	0.0301339	0.0351523	0.0388629	0.044044	0.0350877	0.0380757	0.0300817	0.0365898	0.0310085	0.0375815	0.034188	0.042431	0.0404469	0.0409683	0.0401802	0.0579874	0.0438661	0.0383867	0.0392157	0.0412446	0.0470875	0.029865	0.0442994	0.0375954	0.0567941	0.0405461	0.059322	0.0525704	0.00793651	0.078293	0.0542019	0.0547433	0.0434483	0.0607426	0.051105	0.0228478	0.0147059	0.0193798	0.04
	0.0343428	0.0350793	0.03	0.0350148	0.038202	0.0438911	0.0349975	0.037957	0.0300663	0.035953	0.0308349	0.0371936	0.0333168	0.0416984	0.040425	0.0400445	0.0400452	0.0576248	0.0438659	0.0382255	0.0386296	0.0409836	0.0465985	0.0297242	0.0432612	0.0374912	0.056443	0.0402844	0.0589354	0.0512743	0.00787402	0.0781658	0.0538186	0.0545455	0.0432099	0.0606225	0.0508475	0.0226272	0.0142857	0.0191083	0.04
	0.034153	0.0349235	0.0294785	0.034797	0.0379653	0.0436958	0.0345528	0.0379491	0.0298246	0.0350708	0.0306527	0.0366234	0.0332834	0.0415172	0.0402903	0.0393647	0.0396511	0.0568818	0.043674	0.0380079	0.0381033	0.0403534	0.0465675	0.029714	0.0428706	0.0374396	0.0563925	0.0401338	0.0572337	0.0511482	0.0078125	0.0780934	0.0535867	0.0511454	0.0431336	0.0604994	0.0507114	0.0226194	0.0140845	0.0190931	0.04
	0.0341174	0.0347652	0.0294741	0.0346908	0.0373832	0.0431313	0.0343723	0.036811	0.0294118	0.0347597	0.0300434	0.0363176	0.0331199	0.0413442	0.0391872	0.0389725	0.039604	0.0564327	0.0432788	0.0377408	0.0378176	0.0397351	0.045764	0.0291231	0.0426709	0.0369416	0.0563919	0.0389972	0.056701	0.0507993	0.00763359	0.0767982	0.0528882	0.0510888	0.0429306	0.0600934	0.0503881	0.0225485	0.0138889	0.0189394	0.04
	0.0340426	0.0346291	0.0292683	0.034655	0.0373832	0.043118	0.0342523	0.0364892	0.0290177	0.0347011	0.0299264	0.0360061	0.0330686	0.0411622	0.038584	0.0389156	0.0395644	0.0555556	0.0419315	0.0370955	0.0376876	0.0396386	0.0454877	0.0288055	0.0425813	0.0365	0.0560748	0.0382942	0.0558904	0.0502913	0.00757576	0.0763454	0.0528674	0.0504202	0.0429142	0.0597134	0.0496536	0.0224831	0.0138889	0.018794	0.0381679
	0.0338266	0.0343407	0.0288809	0.0346298	0.0373018	0.0428639	0.0338749	0.0361163	0.0287278	0.0345596	0.029791	0.0356738	0.0329827	0.0407606	0.0385292	0.0380128	0.039559	0.0554264	0.0418698	0.037037	0.0371727	0.0393701	0.0453347	0.028474	0.0423611	0.0363486	0.0559685	0.037796	0.0558273	0.0494169	0.00757576	0.0743628	0.0508596	0.0469852	0.0429049	0.0596624	0.0480151	0.0224396	0.0128205	0.018711	0.037037
	0.0336134	0.0342418	0.0283251	0.0343368	0.0370611	0.0428047	0.0338457	0.0360637	0.0287267	0.0343739	0.0297361	0.0352301	0.0327869	0.0407296	0.0384615	0.0375216	0.0395257	0.0550854	0.0417271	0.0369378	0.0368307	0.0391806	0.0450114	0.0284509	0.0418502	0.0360638	0.0559651	0.0375152	0.0541859	0.0489327	0.00757576	0.074194	0.0489691	0.0458178	0.0427382	0.0592688	0.0472691	0.0224115	0.0119048	0.0183398	0.037037
	0.0330601	0.0341831	0.028119	0.03424	0.0367647	0.042464	0.0336157	0.0360589	0.0286006	0.034188	0.0294213	0.0350253	0.0326382	0.0406114	0.0384615	0.0375074	0.0395095	0.0541132	0.0416667	0.036645	0.0366972	0.0390666	0.0444624	0.0284404	0.041275	0.035503	0.0541353	0.0363242	0.053479	0.0483425	0.00746269	0.0740122	0.0483496	0.0452273	0.042498	0.0586976	0.046875	0.0224033	0.0117647	0.0182648	0.0357143
	0.032427	0.0337527	0.0280414	0.0341656	0.0360656	0.0423601	0.0328692	0.0360087	0.028142	0.0341718	0.0293445	0.034292	0.0326279	0.0399647	0.038237	0.0370594	0.0392442	0.0539456	0.0410959	0.0359354	0.0366972	0.0376822	0.0436708	0.0283635	0.0407041	0.0354523	0.0538412	0.0355494	0.0526316	0.0481611	0.00735294	0.0737908	0.0483487	0.0438984	0.0418612	0.0579577	0.0466074	0.0216216	0.0117647	0.0181818	0.0353535
	0.0323286	0.0337401	0.0279287	0.0339812	0.0355317	0.0417827	0.0328482	0.0359473	0.0279292	0.0339851	0.0292084	0.0335633	0.0324675	0.0398253	0.03792	0.0368133	0.0379895	0.0538462	0.041074	0.0359159	0.0363481	0.0374468	0.0435787	0.0282738	0.0404168	0.0347305	0.053497	0.035377	0.0517121	0.0478548	0.00735294	0.0737516	0.0465116	0.039922	0.0416009	0.0578187	0.0463822	0.0214859	0.0113636	0.0181347	0.0352941
	0.0320486	0.0336634	0.0277108	0.0329337	0.0352992	0.0417154	0.0321449	0.0359207	0.0277778	0.0322581	0.0289017	0.0334339	0.0322468	0.038942	0.0372671	0.0367466	0.037931	0.0535256	0.0408884	0.0354688	0.0355872	0.0373462	0.0435023	0.0277325	0.0403587	0.0341991	0.0534777	0.0352697	0.0515708	0.0476911	0.00729927	0.0717437	0.0463886	0.0396944	0.0415094	0.0572648	0.0451903	0.0210893	0.011194	0.0181087	0.0350877
	0.0316786	0.0334031	0.0275102	0.0326175	0.0351754	0.0416667	0.0321007	0.0358495	0.0276611	0.0319129	0.0288082	0.0331773	0.0320491	0.0384983	0.037037	0.0362185	0.0378229	0.0530327	0.0407314	0.0353552	0.0352803	0.0350714	0.0431642	0.0276817	0.0399863	0.0338645	0.0534094	0.0345806	0.0500634	0.0469083	0.00719424	0.0714286	0.045781	0.0388693	0.0412371	0.0567376	0.0450358	0.0209776	0.010989	0.018018	0.0333333
	0.0315811	0.0330241	0.0273058	0.0326139	0.0351334	0.0408537	0.0312134	0.0354657	0.0275262	0.0315094	0.0286738	0.033033	0.0319882	0.0384347	0.0369804	0.0361808	0.037788	0.0523085	0.0403541	0.0352841	0.0352485	0.0344828	0.0427693	0.0266667	0.0397332	0.0331214	0.052862	0.03396	0.0499771	0.0459883	0.00706714	0.0695052	0.0456634	0.0377358	0.0407524	0.0556909	0.0439324	0.0209354	0.0108696	0.0177515	0.0333333
	0.0315543	0.032851	0.0270619	0.031865	0.0345662	0.0408163	0.0305033	0.0353705	0.0274235	0.031339	0.0283741	0.0328346	0.0315789	0.0378742	0.0367173	0.0358166	0.037594	0.0522088	0.0400173	0.0338748	0.0350727	0.0344574	0.0424276	0.0265579	0.039619	0.0325203	0.0521753	0.0338325	0.0495751	0.0459726	0.00704225	0.0693631	0.0456432	0.0376251	0.0400054	0.0551802	0.043023	0.0207055	0.0106383	0.0170543	0.0333333
	0.0310731	0.0327406	0.0267996	0.0318471	0.0343628	0.0407447	0.0301508	0.0350681	0.0270078	0.0313076	0.0283248	0.0325018	0.0312185	0.0375	0.0366649	0.0353305	0.0372596	0.05215	0.0398208	0.032197	0.0346535	0.033752	0.0423398	0.0265285	0.0394052	0.0323552	0.0518797	0.0332937	0.0493151	0.0459459	0.00704225	0.0684951	0.0446104	0.0344828	0.0398967	0.0549839	0.042589	0.0206516	0.0106383	0.017017	0.0333333
	0.0305029	0.0327144	0.0267547	0.0316715	0.0339751	0.0405603	0.0296418	0.0349058	0.0269598	0.0310219	0.0281949	0.0313808	0.0310881	0.0371729	0.0366638	0.0349714	0.0371195	0.0520566	0.0396316	0.0321864	0.0344828	0.0335008	0.0421546	0.0259853	0.0392805	0.0321942	0.0514891	0.0318021	0.0483061	0.0457746	0.00699301	0.0678724	0.0432985	0.0344655	0.0392795	0.0543923	0.0421687	0.0206389	0.0105263	0.0167866	0.0322581
	0.0304131	0.0325901	0.0267495	0.0310643	0.0339179	0.0401747	0.0295294	0.0348304	0.0267841	0.0309643	0.0280602	0.03125	0.0310125	0.0369521	0.0362258	0.0345243	0.0361736	0.0518845	0.0394599	0.0321302	0.0344468	0.0332926	0.0421359	0.0251054	0.0392395	0.0310318	0.0514223	0.0310078	0.0452893	0.0454764	0.00680272	0.067641	0.0429604	0.0336194	0.0392772	0.054242	0.0420998	0.0206237	0.0102041	0.0167131	0.0322581
	0.0301803	0.0325051	0.0266593	0.0307153	0.0338997	0.0399153	0.0294606	0.0346797	0.0266344	0.0306103	0.027886	0.0310916	0.0307362	0.0364222	0.0361735	0.0342287	0.0357815	0.0510868	0.0391521	0.0321116	0.0343375	0.0332726	0.041958	0.0250043	0.0389356	0.0301508	0.0511983	0.0305851	0.0452034	0.045388	0.00665188	0.0674617	0.0416885	0.0330334	0.039224	0.0540491	0.0416325	0.0203349	0.0102041	0.0166667	0.0322581
	0.02997	0.0324345	0.0263032	0.0306913	0.0335052	0.0397992	0.0291464	0.0346005	0.0266187	0.0305466	0.0278483	0.030859	0.0305181	0.0358911	0.0359935	0.0336955	0.0341556	0.0510455	0.0385012	0.0319625	0.033557	0.032569	0.0411962	0.0237932	0.0387597	0.0300049	0.0485167	0.030526	0.0448291	0.0452683	0.00660066	0.0664991	0.0416006	0.0324324	0.039011	0.0534699	0.041629	0.0201932	0.0102041	0.0166667	0.0322581
	0.0299252	0.032386	0.0262993	0.0306452	0.0331914	0.0397506	0.0288326	0.0345395	0.0265716	0.0304461	0.0276811	0.0303843	0.0295276	0.0357325	0.0355015	0.033389	0.0341014	0.0508475	0.0383836	0.0319149	0.0333333	0.0324443	0.0410959	0.0237346	0.0387442	0.0294846	0.0482452	0.0304183	0.0444444	0.0446682	0.00641026	0.066424	0.04144	0.0314653	0.0389963	0.0528146	0.0415212	0.0201005	0.010101	0.0165289	0.03125
	0.0299246	0.0322102	0.0262172	0.0304562	0.0331453	0.0397008	0.0286718	0.0342687	0.0265306	0.0300976	0.0275229	0.030303	0.0288958	0.035515	0.0346093	0.0330986	0.0340092	0.0506625	0.0383686	0.0308642	0.0332146	0.0322581	0.0408568	0.0237014	0.0385374	0.0292615	0.0472921	0.0297619	0.0441292	0.0445318	0.00638298	0.0660413	0.0395363	0.0304774	0.0388601	0.0524194	0.0406392	0.0200837	0.01	0.0165289	0.03125
	0.0299233	0.0322043	0.0254769	0.0301262	0.0325983	0.0389262	0.0284338	0.033904	0.0264706	0.0300633	0.0270224	0.0301541	0.0288344	0.0350812	0.0346058	0.0327381	0.0336943	0.0504412	0.0377358	0.0305481	0.0331471	0.0321883	0.040673	0.0236486	0.0384615	0.0290663	0.0472429	0.0297177	0.0434783	0.0443728	0.00636943	0.0654896	0.038518	0.030303	0.0386839	0.052257	0.0402642	0.0200292	0.00990099	0.0164474	0.03125
	0.0298855	0.0321285	0.0254169	0.0299071	0.0318689	0.0386362	0.0279206	0.0323848	0.0263158	0.0298343	0.0264379	0.0296715	0.0288313	0.0340909	0.0341841	0.032538	0.0334836	0.0500462	0.0377026	0.0298039	0.032926	0.0320444	0.0406205	0.0236238	0.0384386	0.0286961	0.0467594	0.0291793	0.0416667	0.0439108	0.00628931	0.0621242	0.0383065	0.0301593	0.0382374	0.0516304	0.0401606	0.0200148	0.00990099	0.0163934	0.03125
	0.0289256	0.0321242	0.0252387	0.0296563	0.0318601	0.0385347	0.0278492	0.0323668	0.0260247	0.0295381	0.0263158	0.0295798	0.0285751	0.0340659	0.033697	0.0325353	0.033443	0.04984	0.0375314	0.0293121	0.0322581	0.031589	0.0399708	0.02351	0.0380775	0.0282984	0.0466621	0.0290342	0.0413778	0.0437956	0.00613497	0.060621	0.0379282	0.0301407	0.0382244	0.0509904	0.0400787	0.0199313	0.00990099	0.0163934	0.03125
	0.0288345	0.0310482	0.0248614	0.0292875	0.03166	0.0375771	0.0276549	0.0322475	0.025974	0.0293144	0.0262372	0.029029	0.0285714	0.0340506	0.0335821	0.0325064	0.0327869	0.0495341	0.0371073	0.029202	0.0320171	0.030303	0.0398063	0.0233463	0.0379341	0.0279938	0.0461107	0.0289946	0.0412088	0.0434907	0.00609756	0.058677	0.0375567	0.0299825	0.0380758	0.0507188	0.0392316	0.0197011	0.00970874	0.0160891	0.030303
	0.0287356	0.0309751	0.0247858	0.0289555	0.0312154	0.0372066	0.0273032	0.0322324	0.0257337	0.0291287	0.0260417	0.0289798	0.0283278	0.0340452	0.032967	0.0324173	0.0326724	0.0494735	0.0367377	0.0291025	0.0318286	0.0297464	0.0393959	0.0232558	0.0378812	0.0278305	0.0449057	0.0283938	0.040411	0.0432009	0.00609756	0.0576887	0.0368374	0.0298581	0.0379383	0.050224	0.0389105	0.0191726	0.00970874	0.0158228	0.0294118
	0.0286615	0.0308151	0.0246914	0.0287929	0.0308597	0.0371096	0.026738	0.032025	0.0256809	0.0286544	0.0260417	0.028954	0.0282421	0.0340426	0.0328695	0.0323693	0.032666	0.0487722	0.0363979	0.0290557	0.0316557	0.029638	0.0389147	0.0231845	0.0365962	0.0278279	0.0446409	0.0281049	0.040404	0.043152	0.00607287	0.0576132	0.0365902	0.0294118	0.0375587	0.0492443	0.0386308	0.0189702	0.00970874	0.0157368	0.0294118
	0.0284571	0.0304569	0.0244073	0.0286556	0.0307308	0.0369825	0.0266667	0.0319149	0.0253105	0.0285714	0.0259899	0.0281587	0.0282245	0.0335515	0.0328179	0.0321589	0.032419	0.0483733	0.0360349	0.0290484	0.0315789	0.0296338	0.0389034	0.0231415	0.0363047	0.0276539	0.0441573	0.0279898	0.04	0.0430886	0.00606061	0.0571117	0.0360023	0.0292907	0.0375	0.0491803	0.0383264	0.0189251	0.00961538	0.0156472	0.0294118
	0.0283333	0.0297712	0.0243902	0.0286176	0.0304874	0.0363636	0.0262043	0.031886	0.025235	0.0285714	0.0259037	0.0279359	0.0278151	0.0334928	0.0322581	0.0316647	0.0324032	0.0478723	0.0354758	0.0288092	0.03125	0.0295514	0.0386164	0.0230769	0.0362582	0.0273723	0.0437083	0.027823	0.0394737	0.0427711	0.00589971	0.056652	0.0358343	0.0292256	0.0371747	0.0479042	0.0383251	0.0188841	0.00961538	0.0153257	0.0289855
	0.028282	0.0295605	0.0242514	0.028551	0.0302927	0.0358786	0.0261459	0.0318584	0.0249634	0.0285465	0.0257048	0.0276982	0.0274646	0.0326633	0.0321526	0.0314115	0.0321402	0.0478261	0.0353837	0.0287156	0.0310345	0.0285714	0.0380749	0.023023	0.0361976	0.0271918	0.0435266	0.0275023	0.039148	0.0424766	0.00582524	0.0563712	0.0357143	0.0290891	0.0366647	0.0477077	0.0373784	0.0187947	0.00952381	0.0151515	0.0285714
	0.0278625	0.0294521	0.0240842	0.0283286	0.0300998	0.0346615	0.0259705	0.0318103	0.0242045	0.0284646	0.0257025	0.0276052	0.0273279	0.03253	0.0320268	0.0311075	0.0318858	0.0478	0.0348959	0.0285584	0.0309513	0.0285714	0.0379186	0.022807	0.0359497	0.0265911	0.0417459	0.0269687	0.0369779	0.0422535	0.00581395	0.0563408	0.0356278	0.0285714	0.0365107	0.047561	0.0372942	0.0187408	0.00952381	0.0150862	0.0285714
	0.0277016	0.0294118	0.0239721	0.0283286	0.0300214	0.0339096	0.0258866	0.03177	0.0238829	0.028219	0.0253968	0.0274579	0.0268109	0.0325203	0.0320243	0.0310673	0.0317726	0.047619	0.0347238	0.0279074	0.0307309	0.0283429	0.0377964	0.0226816	0.035163	0.0265865	0.0416228	0.0268615	0.0362794	0.0419636	0.00564972	0.0555556	0.0352941	0.027449	0.036253	0.0475375	0.0368201	0.0187394	0.00925926	0.0149254	0.028169
	0.0275446	0.0291339	0.0234925	0.0283267	0.0295223	0.0338691	0.0258598	0.03177	0.0237965	0.0281174	0.025	0.0273287	0.0267261	0.0323129	0.0315136	0.0309278	0.0317533	0.0473875	0.0346084	0.0279052	0.0307216	0.0280464	0.037347	0.0226403	0.0351097	0.02657	0.0414508	0.0268007	0.0359712	0.0414883	0.00564972	0.0549866	0.0348534	0.027027	0.0356989	0.0474285	0.0364877	0.0187131	0.00917431	0.0149254	0.0277778
	0.0275344	0.0289953	0.0234742	0.0278751	0.0294299	0.0332481	0.0258405	0.0317428	0.0237154	0.0280431	0.0249104	0.0270158	0.0266133	0.0322712	0.0309073	0.0302531	0.031746	0.0469954	0.0342355	0.0277528	0.0301866	0.0277022	0.0360825	0.0225911	0.0349869	0.0263863	0.0414425	0.0265861	0.0357143	0.0413142	0.00561798	0.0542684	0.033675	0.0263914	0.0355155	0.0474021	0.036036	0.018661	0.00884956	0.0148515	0.0277778
	0.0275265	0.0289235	0.0232106	0.0273423	0.0291243	0.0332226	0.025572	0.0317268	0.0237001	0.0278792	0.0247766	0.0262009	0.0263692	0.0318396	0.0307121	0.0294805	0.0316623	0.0467883	0.0342069	0.0276587	0.0300235	0.027229	0.0357858	0.0222977	0.0347176	0.0263158	0.0399298	0.0264619	0.0355228	0.0410237	0.00561798	0.0539063	0.0330103	0.025641	0.0353913	0.0472644	0.0351217	0.0186007	0.00862069	0.0144509	0.0277778
	0.0275229	0.0288788	0.0232089	0.0270151	0.0285714	0.033195	0.0254188	0.0315318	0.0235912	0.0278051	0.0247538	0.0259922	0.026296	0.0316315	0.0301779	0.0294184	0.0314477	0.0466702	0.0335755	0.0276243	0.03	0.0260664	0.0357143	0.0220831	0.0344744	0.0255633	0.0394341	0.0263999	0.0353982	0.0409051	0.00543478	0.0529649	0.0327796	0.025413	0.0347551	0.0472067	0.0345561	0.0184662	0.00862069	0.0144144	0.027027
	0.0275049	0.0287846	0.0231509	0.0267292	0.0285016	0.0330985	0.025388	0.0315261	0.0234936	0.0277778	0.0246652	0.025487	0.0262679	0.031483	0.030063	0.0289798	0.0314066	0.0451327	0.0334167	0.0270061	0.0296785	0.0257771	0.0353886	0.0220763	0.0341997	0.0255382	0.0394326	0.0261283	0.0351117	0.0400475	0.00540541	0.0520413	0.031909	0.0253012	0.0343658	0.0466295	0.0336842	0.0182167	0.00847458	0.0143541	0.0266667
	0.0273443	0.0284698	0.0230647	0.0266393	0.0283097	0.0328638	0.025296	0.0310734	0.0234352	0.0277778	0.0246262	0.0253731	0.0262568	0.0313776	0.0298727	0.0286629	0.031237	0.0447917	0.0331126	0.0269691	0.029304	0.0257652	0.0352887	0.0220345	0.033891	0.0253957	0.0394257	0.0258981	0.0349523	0.0397727	0.00537634	0.0519439	0.031051	0.0246764	0.0341655	0.0465679	0.033269	0.0181638	0.00833333	0.0140845	0.025641
	0.0270218	0.0283524	0.0229885	0.0266033	0.0283032	0.0327935	0.02502	0.0310421	0.0232618	0.0277238	0.0242448	0.0248947	0.02624	0.0309672	0.0298507	0.0285797	0.0309989	0.0442704	0.0330481	0.0267442	0.0291604	0.0257353	0.0349194	0.0218182	0.0331103	0.0251828	0.0393357	0.0257075	0.0342466	0.0396691	0.00534759	0.0518084	0.0309504	0.0245271	0.0338316	0.0461538	0.0322837	0.0181457	0.00826446	0.0139276	0.025641
	0.026801	0.0279675	0.022984	0.0265008	0.0282267	0.0324609	0.0248867	0.0309968	0.0232383	0.0276491	0.0241935	0.0248744	0.0262182	0.0308151	0.0296643	0.0281518	0.0309633	0.043857	0.0322894	0.0265728	0.028466	0.0257053	0.0347805	0.0217391	0.0328947	0.0251046	0.039034	0.0252618	0.0340909	0.0393873	0.00534759	0.0516994	0.0308008	0.0245191	0.0332921	0.0459879	0.0320798	0.0180819	0.00826446	0.0136674	0.025
	0.0267857	0.0278677	0.0229644	0.0264738	0.028197	0.0323408	0.024839	0.030767	0.0230355	0.027451	0.0241935	0.0247726	0.025974	0.0306859	0.0294934	0.0281408	0.0301769	0.0438569	0.0322499	0.0265213	0.0282589	0.0255285	0.0346463	0.0212766	0.0328912	0.024928	0.038769	0.0251046	0.0335724	0.0390456	0.00531915	0.0516691	0.0303929	0.0243902	0.0332884	0.0458915	0.0317334	0.0179198	0.00819672	0.013624	0.025
	0.0265096	0.0276163	0.0226976	0.0262612	0.0281869	0.0316456	0.0248276	0.0307023	0.0229027	0.0274368	0.0240949	0.0247358	0.0259097	0.0306222	0.0292581	0.0280374	0.0297994	0.0436577	0.031746	0.026476	0.0281124	0.0254253	0.0346355	0.0209282	0.0327869	0.0249199	0.038355	0.024855	0.0326567	0.039043	0.00531915	0.0516532	0.0300521	0.0243814	0.032967	0.0457825	0.0315682	0.0178536	0.00806452	0.0136054	0.025
	0.0260677	0.0274021	0.0226458	0.0260372	0.0280884	0.0314194	0.0247833	0.0306346	0.0228996	0.0273973	0.0239773	0.0246195	0.0258259	0.0302653	0.0290523	0.0278358	0.0296781	0.043226	0.031746	0.0264175	0.0280874	0.0254026	0.0345382	0.0207397	0.0326994	0.0246777	0.0378911	0.024653	0.0324675	0.038956	0.00526316	0.0507274	0.0299291	0.0241966	0.0328947	0.0456938	0.031379	0.0178078	0.00806452	0.0133588	0.025
	0.0258519	0.0272637	0.0226346	0.0259723	0.0279419	0.030303	0.0247316	0.0306048	0.022628	0.0267471	0.0237944	0.0245399	0.0256446	0.0301388	0.0284789	0.0277952	0.0295608	0.0431048	0.0314727	0.0263628	0.0278163	0.0251751	0.0342934	0.0207341	0.0324519	0.0246164	0.0378764	0.0243936	0.0318821	0.0389078	0.00526316	0.0507059	0.0298977	0.0241863	0.0327506	0.0454545	0.0312655	0.0177891	0.00806452	0.0133333	0.025
	0.0257941	0.0272338	0.0222318	0.0255102	0.0274893	0.0294344	0.0246914	0.0304664	0.0225	0.0265205	0.0235636	0.0243087	0.025641	0.0297564	0.028169	0.0273973	0.0293225	0.0428305	0.0309365	0.026087	0.0277778	0.0251656	0.0335161	0.0205479	0.0321484	0.0245174	0.0369022	0.0243077	0.0317675	0.0387687	0.0052356	0.0505372	0.0293538	0.024	0.0326703	0.0454142	0.03125	0.0177697	0.008	0.0131579	0.025
	0.0256934	0.0271783	0.0222222	0.0252938	0.0272811	0.0294118	0.0242934	0.0304216	0.0224996	0.0264257	0.0231562	0.0242552	0.0255392	0.029559	0.0279564	0.0272701	0.0289735	0.0424597	0.0308869	0.0260805	0.0275229	0.0249828	0.0334878	0.0204857	0.0313565	0.0241519	0.0353869	0.0241365	0.0305742	0.0383785	0.00520833	0.0502677	0.0288635	0.0239644	0.0324389	0.0447471	0.0309156	0.0177346	0.008	0.012987	0.0243902
	0.0254331	0.027141	0.0220588	0.0251728	0.0264037	0.0286073	0.0242616	0.0301807	0.0223551	0.0256481	0.023096	0.0241957	0.0254698	0.0295023	0.0271882	0.0271003	0.0288568	0.042343	0.0301751	0.025974	0.0274258	0.0249176	0.0332887	0.0202937	0.031256	0.023998	0.0353307	0.02407	0.030303	0.0379645	0.00520833	0.0501125	0.0286254	0.0239196	0.032117	0.044263	0.0308659	0.0177149	0.008	0.0128205	0.0232558
	0.0253214	0.0270766	0.0220253	0.0251483	0.0260304	0.0285958	0.0241475	0.0301029	0.0222251	0.0255853	0.022946	0.0241657	0.0251256	0.0291521	0.0267121	0.026347	0.0288248	0.0418028	0.0298976	0.0257732	0.0270775	0.0248626	0.0327017	0.0201928	0.0312156	0.0238365	0.0346127	0.0232116	0.0295699	0.0371854	0.00518135	0.05	0.0275735	0.0238579	0.0320115	0.0440717	0.0307692	0.0177134	0.008	0.0127389	0.0232558
	0.0250432	0.0269182	0.021971	0.0250412	0.025765	0.0284229	0.0241467	0.0298448	0.0221121	0.0255423	0.0229327	0.0240964	0.025082	0.0288779	0.0266241	0.0260311	0.0287973	0.0417065	0.0298047	0.025641	0.026717	0.0248216	0.0326432	0.0194805	0.0311211	0.0238353	0.0334668	0.0230179	0.0293475	0.0371696	0.00514139	0.0497788	0.0275325	0.0237957	0.0319149	0.0438917	0.03002	0.0176759	0.00787402	0.0126582	0.0232558
	0.0246523	0.0268185	0.0219569	0.0249089	0.0257423	0.0283454	0.0239549	0.0293599	0.0220193	0.025538	0.0223471	0.024	0.0248904	0.0288733	0.0261759	0.025974	0.0286029	0.0410959	0.0297259	0.0252683	0.0265928	0.0245902	0.0326072	0.019399	0.0308219	0.0238253	0.0328228	0.0227273	0.0287392	0.0371207	0.00510204	0.0494505	0.0275155	0.02374	0.0318841	0.0430261	0.029682	0.017658	0.00787402	0.0126582	0.0227273
	0.0245934	0.0265915	0.0219421	0.0247796	0.0253595	0.0282784	0.0234796	0.0291957	0.0219746	0.0253231	0.0221519	0.0238156	0.0247908	0.0283688	0.0260312	0.0259417	0.0285881	0.0407883	0.0290839	0.0248356	0.0263543	0.0243145	0.0324232	0.0192046	0.0308076	0.0235679	0.0325733	0.0226433	0.0287053	0.0370156	0.00507614	0.0492091	0.0273698	0.0236946	0.0317632	0.0412426	0.0295536	0.0176388	0.00787402	0.0126263	0.0227273
	0.0244648	0.0265839	0.0217812	0.0246407	0.0251549	0.0282086	0.0234696	0.029109	0.0218613	0.0252525	0.0221317	0.0237941	0.0246852	0.0278852	0.0257027	0.0257526	0.0284593	0.0403577	0.02877	0.0247619	0.0261807	0.0240922	0.0322581	0.0191811	0.0307998	0.0234731	0.0325268	0.0224183	0.0285714	0.0369898	0.00506329	0.0490642	0.0268065	0.0234177	0.0312404	0.0401309	0.0291874	0.0176294	0.0078125	0.012605	0.0227273
	0.0238095	0.026171	0.0214553	0.024637	0.025021	0.0278578	0.0234192	0.0290963	0.0218415	0.0251132	0.0219466	0.0235228	0.0240964	0.0277921	0.025641	0.025093	0.0283443	0.0398334	0.028621	0.0247525	0.025974	0.0238878	0.0320747	0.0188148	0.0307167	0.0234604	0.0322944	0.0222535	0.0285307	0.0369004	0.00505051	0.0486838	0.026464	0.0233359	0.0304316	0.0401081	0.028124	0.0176197	0.0075188	0.0125786	0.0227273
	0.0237651	0.0259987	0.021342	0.024534	0.0249353	0.0278567	0.0232558	0.0290254	0.0218069	0.0248963	0.021895	0.0232244	0.0240187	0.0277537	0.0254364	0.025044	0.028125	0.0397934	0.0283703	0.0247253	0.0258333	0.0236742	0.0317804	0.0186141	0.0303659	0.0233918	0.0316347	0.0220204	0.0283286	0.0366994	0.00505051	0.0485876	0.0264026	0.0229885	0.0300161	0.0400868	0.0276954	0.017509	0.00746269	0.0121951	0.0227273
	0.0237547	0.0259671	0.0210476	0.0242746	0.0248054	0.0278405	0.0228571	0.0289474	0.0215183	0.0247117	0.0218667	0.0229627	0.0236705	0.0277502	0.0250465	0.0249258	0.0280685	0.0397727	0.0281495	0.0247128	0.0257819	0.0233645	0.0315767	0.0186013	0.0301754	0.023332	0.0316331	0.0219612	0.0281426	0.0365511	0.005	0.0478497	0.0262346	0.0229885	0.0292265	0.04	0.0273224	0.017509	0.00746269	0.0119403	0.0222222
	0.023657	0.02587	0.0209565	0.0238622	0.0242779	0.0277778	0.0225501	0.0287309	0.0214304	0.0242742	0.0216676	0.0227656	0.0236605	0.0274725	0.0249173	0.0247201	0.0279938	0.0392157	0.0275229	0.0245347	0.0253731	0.0232699	0.0313199	0.0184541	0.029513	0.0232612	0.031481	0.02151	0.0274305	0.0365311	0.0049505	0.0460476	0.025641	0.0228211	0.0292081	0.0391312	0.027248	0.0174995	0.00724638	0.0119048	0.0222222
	0.0235081	0.0258356	0.020911	0.0238516	0.024179	0.0277691	0.0224886	0.0282486	0.0213789	0.0242594	0.0216393	0.0224261	0.0235047	0.0273752	0.0248112	0.0246201	0.0279245	0.0385171	0.0275229	0.024437	0.0253205	0.0228629	0.0311181	0.0183774	0.0293296	0.0232558	0.0314371	0.0207612	0.0271673	0.0362582	0.00492611	0.0458553	0.0255918	0.02267	0.0291899	0.0385305	0.0261606	0.0174312	0.00714286	0.0118606	0.0212766
	0.0234046	0.025702	0.0209047	0.0237358	0.0238121	0.0276549	0.0224699	0.0278344	0.0212917	0.023919	0.021319	0.0223673	0.0234114	0.0263128	0.0245902	0.0246106	0.0278174	0.0384088	0.0273973	0.0242376	0.025311	0.0227273	0.0310731	0.0182176	0.0290353	0.022937	0.0313562	0.0206659	0.027027	0.0357391	0.00492611	0.0450363	0.0252226	0.0226548	0.0286169	0.0384725	0.0260567	0.017409	0.00699301	0.0118505	0.0212766
	0.0232975	0.0256717	0.0207376	0.0234983	0.0237209	0.0276131	0.0223464	0.0277992	0.021187	0.0238558	0.0212595	0.0222978	0.0232623	0.0261468	0.0243902	0.0245066	0.0275762	0.0379341	0.0273973	0.0240964	0.0253049	0.0226852	0.0310338	0.0179856	0.0288277	0.0228648	0.0313531	0.0204105	0.0267006	0.0354843	0.00492611	0.0435967	0.0250744	0.0222305	0.0283623	0.0379381	0.0260277	0.0172495	0.00699301	0.0115774	0.0212766
	0.0232558	0.0256656	0.0204908	0.0233437	0.0236501	0.0273186	0.0222186	0.0277462	0.0210526	0.0237455	0.0210773	0.0221618	0.0232376	0.0258007	0.0243902	0.024354	0.0274779	0.0373639	0.0273911	0.023756	0.0252016	0.0224129	0.0309893	0.0178143	0.0285714	0.0228341	0.0305887	0.0203952	0.0265306	0.0351258	0.00490196	0.0430269	0.0250447	0.021776	0.0278803	0.0378838	0.0259834	0.017199	0.00689655	0.0115207	0.021164
	0.0232172	0.0253387	0.0201907	0.0231425	0.0236416	0.0271963	0.0221611	0.0271705	0.0209651	0.023642	0.0210584	0.0221174	0.0232035	0.0256213	0.0243902	0.0240125	0.0273775	0.0370906	0.027342	0.023427	0.0248905	0.022113	0.0309332	0.0177739	0.0282486	0.0227491	0.0303452	0.0203828	0.0260688	0.0351229	0.00483092	0.0424028	0.0244111	0.0215385	0.0278261	0.0378615	0.0258876	0.0171225	0.00649351	0.0115108	0.0208333
	0.0231044	0.025198	0.02019	0.0231184	0.0234213	0.0258449	0.0221391	0.026987	0.0209003	0.0234579	0.0210451	0.0219931	0.023199	0.0256091	0.0241723	0.0235835	0.0272813	0.037037	0.0273297	0.0234105	0.024836	0.0220832	0.0307629	0.017702	0.0279101	0.0225734	0.0303329	0.0201557	0.025958	0.0348985	0.00480769	0.0422857	0.0243678	0.0213642	0.0277849	0.0373644	0.0257251	0.0169587	0.00641026	0.0114613	0.0208333
	0.0230975	0.0251142	0.0201097	0.0230988	0.0230769	0.0257796	0.0220994	0.0269681	0.0207873	0.0234563	0.0210039	0.0219649	0.0230756	0.0254149	0.023462	0.0231341	0.0272237	0.0369668	0.027088	0.0234065	0.0247466	0.0219489	0.0304713	0.0176991	0.0279032	0.0224439	0.0299335	0.019896	0.0258835	0.0344773	0.00480769	0.0417068	0.0241461	0.0211308	0.0267982	0.0371452	0.0254395	0.0169583	0.00632911	0.0113636	0.0208333
	0.0228663	0.0250784	0.0199723	0.0230145	0.0229867	0.0256024	0.021804	0.0269652	0.0205041	0.0233468	0.0208564	0.0218612	0.0230589	0.0250848	0.0234311	0.0230926	0.0271533	0.0367412	0.0269677	0.0232103	0.0247336	0.0218955	0.0302523	0.0176574	0.0278957	0.0223801	0.0296296	0.0197115	0.025785	0.0343008	0.0047619	0.0414759	0.0237627	0.020687	0.0267903	0.0369507	0.0251894	0.0169205	0.00628931	0.0113475	0.0204082
	0.0228591	0.0250271	0.0199489	0.0228903	0.0229084	0.0254623	0.0215054	0.026936	0.0204856	0.023291	0.0207364	0.0217773	0.0228263	0.025	0.0233372	0.0227273	0.0270636	0.0366841	0.026936	0.0229793	0.0246159	0.0218789	0.0294063	0.0175519	0.027671	0.0222904	0.0295639	0.0195531	0.0256805	0.0337449	0.00473934	0.0414695	0.023555	0.0203863	0.0267857	0.0368497	0.0247027	0.0166055	0.00625	0.0112994	0.0204082
	0.0227431	0.0250192	0.0199368	0.0228814	0.0228577	0.0251948	0.0213767	0.0264804	0.0204784	0.0230643	0.0206882	0.0216053	0.022788	0.0248741	0.0232091	0.0226797	0.0269767	0.0365327	0.0266667	0.0229282	0.0245966	0.0215535	0.0291768	0.017537	0.0273675	0.0222686	0.0293686	0.0194651	0.0256217	0.0335907	0.00473934	0.041303	0.0217089	0.02035	0.026738	0.0368493	0.0245757	0.0164375	0.00609756	0.0111801	0.02
	0.0226244	0.0248976	0.0198965	0.0228137	0.0227808	0.0251507	0.0210907	0.0263916	0.0204391	0.022982	0.0206535	0.0215128	0.0227671	0.024854	0.023085	0.0226352	0.0268585	0.0364078	0.0264362	0.0227964	0.0243566	0.0214983	0.0291316	0.0173727	0.0273404	0.0221948	0.0292048	0.0193422	0.0253539	0.0335241	0.00471698	0.0405405	0.021025	0.0202969	0.026738	0.0366448	0.0242113	0.0163532	0.00598802	0.0111266	0.02
	0.0225772	0.0247177	0.0197579	0.0226202	0.0224516	0.025	0.0210716	0.026357	0.0202429	0.0228924	0.0204297	0.021349	0.0226493	0.0246969	0.0227273	0.0226307	0.0267044	0.0357143	0.0259796	0.0227642	0.0242424	0.0212766	0.0290013	0.017331	0.0269058	0.0221066	0.0290941	0.0191342	0.0249618	0.0334833	0.00471698	0.0404204	0.0206572	0.0196078	0.0261723	0.0365745	0.0241803	0.0163312	0.00598802	0.0109141	0.0196078
	0.0225718	0.0245949	0.0197146	0.0226091	0.0215664	0.0248619	0.0210526	0.02619	0.0202213	0.0228183	0.0202932	0.0209329	0.0226443	0.0246457	0.0227273	0.0223881	0.0265111	0.0356533	0.0258598	0.0227189	0.0242064	0.021021	0.0289655	0.0172499	0.0267331	0.0220994	0.028947	0.0191119	0.0249494	0.0334309	0.00469484	0.0403727	0.0203586	0.0194864	0.0253165	0.0360502	0.0240964	0.0163258	0.00595238	0.0108696	0.0196078
	0.0224609	0.0245125	0.0196035	0.0223567	0.0214484	0.0243902	0.0209927	0.0261684	0.0201638	0.0227273	0.0202925	0.020611	0.0224619	0.0241833	0.0227273	0.0221982	0.0263672	0.0352436	0.0255695	0.0226307	0.024093	0.0209194	0.028423	0.0170727	0.0264858	0.0216667	0.0285529	0.0190202	0.0247748	0.0333757	0.00469484	0.0398086	0.0203568	0.0192216	0.0252898	0.0359556	0.0236726	0.0162358	0.00591716	0.0105263	0.0192308
	0.0219403	0.0244413	0.0191205	0.0221976	0.0211839	0.0243317	0.0208028	0.0260708	0.0200533	0.0226854	0.0201283	0.0204178	0.022276	0.0240964	0.0226022	0.0220588	0.0263158	0.0339615	0.0255618	0.0226244	0.0239234	0.0209116	0.028354	0.0169713	0.0261159	0.0215594	0.0284114	0.0190164	0.0246223	0.032403	0.00469484	0.0397086	0.0195764	0.0188679	0.0252525	0.0352585	0.0233697	0.0162246	0.00588235	0.0104167	0.0192308
	0.0217391	0.0244354	0.018994	0.0218607	0.0209915	0.0241692	0.0206044	0.026026	0.0199693	0.0225564	0.0199013	0.0204082	0.0222253	0.0238317	0.0225455	0.0219711	0.0263158	0.0337294	0.025052	0.0224278	0.0238719	0.020908	0.0282725	0.0165913	0.0251651	0.0215254	0.0283371	0.0179852	0.0243902	0.0322776	0.0046729	0.0385071	0.0192626	0.0188017	0.0250478	0.0345796	0.0232558	0.0161476	0.00578035	0.0104167	0.0192308
	0.0216323	0.02443	0.0189797	0.021719	0.0209883	0.0238328	0.0203735	0.0259191	0.0196652	0.0224348	0.019802	0.0200472	0.0219272	0.0233537	0.0225406	0.0219416	0.0259954	0.0328283	0.0240572	0.0223746	0.0238651	0.0208585	0.027584	0.0163488	0.0250809	0.0214984	0.0279312	0.0176027	0.0243581	0.031861	0.00465116	0.0383375	0.0177825	0.0184461	0.025	0.0341926	0.0231898	0.0160279	0.00578035	0.0103448	0.0189573
	0.0214706	0.0243247	0.0189303	0.0216039	0.0207979	0.0237715	0.0202719	0.0256508	0.0195334	0.0223383	0.019637	0.0197381	0.0218444	0.0230415	0.0225158	0.0215144	0.0259605	0.0325429	0.0236824	0.02218	0.0237037	0.0207957	0.0274893	0.0162709	0.0247619	0.0213098	0.0278447	0.0175719	0.0242732	0.0317719	0.00462963	0.0382452	0.0176465	0.0183802	0.0248648	0.0340136	0.0231241	0.0159459	0.00578035	0.0102564	0.0188679
	0.0214114	0.0241935	0.0189205	0.0215997	0.0207523	0.0234045	0.0202031	0.0256357	0.0192333	0.022103	0.0195312	0.0192678	0.0218042	0.02302	0.0224545	0.0211981	0.0258176	0.0325	0.0234114	0.0221622	0.0236686	0.0207352	0.0273946	0.0161943	0.0246914	0.0212901	0.0278422	0.0175439	0.0240964	0.0316389	0.00462963	0.0378323	0.0175953	0.0182083	0.0241821	0.0329612	0.0226713	0.0159236	0.00574713	0.0102249	0.0188679
	0.0212895	0.0241846	0.0188953	0.0215974	0.0207066	0.0234021	0.0201662	0.0255959	0.0187976	0.0218798	0.0194795	0.0191993	0.0216867	0.022908	0.0223852	0.0211215	0.0252996	0.0324519	0.0232128	0.0221393	0.0235597	0.020296	0.0273899	0.0159241	0.0246914	0.0208333	0.0277627	0.0173118	0.0239214	0.0315518	0.00458716	0.0374546	0.0167921	0.0181803	0.0237715	0.0328922	0.0225847	0.0158699	0.00571429	0.010101	0.0188679
	0.0212289	0.0241164	0.0188753	0.0213675	0.0206485	0.0233466	0.02	0.0255878	0.0187075	0.021645	0.0194444	0.0190819	0.0216781	0.0226712	0.0223198	0.021004	0.0252427	0.0321319	0.0231284	0.0220285	0.0234005	0.0202468	0.027027	0.0159119	0.0245968	0.0207997	0.0276105	0.0171967	0.0236088	0.0313456	0.00456621	0.036671	0.0166922	0.0181771	0.0235294	0.0323249	0.0224269	0.0158489	0.00568182	0.0100671	0.0185185
	0.0211607	0.0240025	0.0186782	0.0211645	0.020494	0.0232606	0.0199853	0.0255328	0.0186723	0.0215389	0.0193989	0.0190114	0.021648	0.0224822	0.0222222	0.0207254	0.0250912	0.0321101	0.0231218	0.021894	0.0233459	0.0202337	0.0269227	0.0158924	0.0245468	0.0207345	0.0275474	0.0167208	0.0226151	0.0313433	0.00454545	0.0361128	0.0165981	0.0181211	0.022979	0.0323162	0.0222222	0.015818	0.00568182	0.00997506	0.0185185
	0.0211158	0.0239977	0.0186614	0.0210257	0.0204823	0.0231523	0.019831	0.0254181	0.0186412	0.0214395	0.0193691	0.0188679	0.0213931	0.0224138	0.0222132	0.020496	0.025025	0.0318012	0.0223357	0.0216895	0.0232687	0.0200817	0.0267219	0.0157767	0.0244604	0.0205805	0.0274795	0.0163728	0.0223586	0.0311787	0.0045045	0.0357143	0.0165089	0.0178735	0.0223633	0.0317683	0.0220794	0.0157355	0.00568182	0.00992908	0.0178571
	0.0208376	0.0238479	0.0186595	0.0209542	0.0204046	0.0230843	0.0197505	0.0253602	0.0184095	0.0214347	0.0192829	0.0187075	0.0212107	0.0224016	0.0221689	0.0200481	0.0249597	0.0316907	0.0220459	0.0216106	0.0230067	0.0199419	0.0266057	0.015534	0.0244499	0.0200371	0.0266759	0.0163361	0.0223488	0.0310321	0.0044843	0.035631	0.0164408	0.0177854	0.0222908	0.0316082	0.0218579	0.0156951	0.00564972	0.00987654	0.0178571
	0.0208029	0.0237859	0.0186577	0.0208735	0.0201153	0.0229485	0.0197368	0.0253294	0.0182266	0.0213582	0.0192582	0.01864	0.0211715	0.0223206	0.022164	0.0200401	0.0248963	0.0309536	0.0220363	0.0214871	0.0229996	0.0199258	0.026165	0.0155312	0.0242006	0.0199055	0.0265907	0.0158335	0.0222222	0.0308819	0.0044843	0.0350052	0.0162321	0.0177679	0.0222346	0.0314131	0.0215814	0.0156665	0.00564972	0.00986842	0.0175439
	0.0206998	0.0237576	0.0186542	0.0208448	0.0198176	0.0224599	0.0196645	0.0252443	0.0181818	0.0213483	0.0191856	0.0184941	0.0210526	0.0222222	0.0221514	0.0197667	0.0248092	0.0301047	0.0219355	0.0214031	0.0225989	0.0196078	0.0257634	0.0153748	0.0241107	0.0197678	0.0264711	0.01566	0.0219273	0.0301361	0.0044843	0.0349683	0.0158328	0.0173863	0.0221948	0.0312693	0.0213836	0.0155678	0.00561798	0.00985915	0.0173913
	0.0206897	0.0236496	0.0186092	0.0208333	0.0195458	0.0224595	0.0196523	0.0249709	0.0179288	0.0213012	0.0191136	0.0182099	0.0208928	0.0221619	0.0221277	0.0197424	0.0246792	0.029703	0.0219173	0.0213608	0.0225207	0.0194424	0.0257358	0.0153231	0.0239938	0.0197253	0.0261194	0.01553	0.0219233	0.0300613	0.0044843	0.0348837	0.0156204	0.0172414	0.0217183	0.0306947	0.020982	0.0155396	0.00558659	0.00980392	0.016129
	0.0203656	0.0236162	0.0186016	0.0207751	0.019393	0.0223399	0.0196009	0.0248288	0.0178959	0.0213002	0.0190931	0.0181938	0.0208779	0.0221162	0.0217819	0.0196976	0.0245673	0.0296482	0.0219056	0.0210526	0.0224601	0.0194062	0.0255663	0.0151849	0.0238245	0.0196974	0.0257753	0.0155039	0.0218978	0.0300033	0.00446429	0.0345377	0.0150489	0.0170472	0.0211708	0.030412	0.0209446	0.0154028	0.00555556	0.00970874	0.015873
	0.0202926	0.0235447	0.0185479	0.0207373	0.0191447	0.0222761	0.0195913	0.0248264	0.0178518	0.0212509	0.018907	0.0181712	0.0208167	0.0220729	0.0216795	0.0196773	0.024407	0.0294985	0.0217524	0.0209499	0.0224568	0.0192662	0.0254439	0.0151515	0.0236777	0.0196748	0.0255166	0.0153919	0.0209908	0.0295738	0.00444444	0.034324	0.0150106	0.0164585	0.0207226	0.03	0.0207303	0.0152824	0.00555556	0.00970874	0.015873
	0.0201045	0.0234742	0.0183168	0.020678	0.0189041	0.0221331	0.0195825	0.0247788	0.0178513	0.0212314	0.018821	0.0178963	0.0205839	0.022033	0.0216637	0.0195325	0.0243161	0.0294964	0.0214439	0.0209225	0.0223985	0.0192052	0.0253852	0.0149368	0.023554	0.0194656	0.0252453	0.0149216	0.0209302	0.0293064	0.00444444	0.0339247	0.0149538	0.0163043	0.0207003	0.0284762	0.0203785	0.0152629	0.00552486	0.00955882	0.015625
	0.0200364	0.0233627	0.0182815	0.0205748	0.0188537	0.0220562	0.0194214	0.024744	0.0177778	0.0209858	0.0187573	0.0178105	0.0205834	0.0220232	0.0216132	0.0192733	0.024237	0.0285259	0.0214392	0.020903	0.0223881	0.0191781	0.0252059	0.0149083	0.0233798	0.0193741	0.0251157	0.0147783	0.020711	0.02918	0.00444444	0.0337867	0.0148344	0.0162338	0.0206619	0.0270636	0.0201407	0.0151968	0.00552486	0.0094518	0.0153846
	0.0199468	0.0233004	0.0182311	0.0205181	0.0188422	0.0219864	0.0191375	0.0246889	0.0177305	0.0209821	0.0186737	0.0177536	0.0205807	0.0219447	0.0216076	0.0192308	0.0241546	0.0279731	0.0213706	0.0208986	0.0222222	0.0191578	0.0252011	0.014753	0.0233463	0.0191655	0.0249857	0.0147381	0.0200445	0.0289193	0.00442478	0.033669	0.0148242	0.0160788	0.0202564	0.0267857	0.0198477	0.0151457	0.00540541	0.00943396	0.0153846
	0.0199297	0.0232118	0.0182221	0.0204898	0.0187696	0.0219454	0.019084	0.0245319	0.0177196	0.020632	0.0186687	0.0176628	0.0205377	0.0218021	0.0216065	0.0191471	0.0239316	0.0264901	0.0212766	0.020851	0.0222222	0.0191571	0.0251908	0.0147387	0.023074	0.0191639	0.0249132	0.0146461	0.0194175	0.0288864	0.00438596	0.0326096	0.0147968	0.0160256	0.0200263	0.0258439	0.0197875	0.0151324	0.00537634	0.00943396	0.0153846
	0.0197667	0.0231864	0.0179521	0.0204778	0.0187062	0.0219124	0.0190441	0.0242042	0.0176525	0.0205832	0.0186254	0.0175801	0.0203824	0.0217195	0.0215132	0.0190724	0.0239112	0.0264012	0.0212179	0.0208124	0.0222032	0.0191498	0.0251519	0.0145631	0.022997	0.0187833	0.024729	0.0144878	0.0191083	0.0288264	0.00434783	0.0320513	0.014783	0.0160138	0.0198777	0.025487	0.0197447	0.0150778	0.00534759	0.00943396	0.0153846
	0.0197033	0.023166	0.0179483	0.020476	0.0185678	0.0218051	0.01901	0.0236998	0.0174927	0.0205505	0.0184813	0.017533	0.020063	0.02161	0.0213812	0.019019	0.0237838	0.0259725	0.0209929	0.0208014	0.0220981	0.0189266	0.0249032	0.0144928	0.0226871	0.0186645	0.024604	0.0143216	0.0190304	0.0288259	0.00431034	0.0318647	0.0146346	0.0158487	0.0198631	0.0251741	0.0196006	0.0150685	0.00531915	0.00938086	0.0153846
	0.0196423	0.0231357	0.0179319	0.020362	0.0184361	0.0217168	0.0189181	0.0235589	0.017402	0.0204082	0.0184478	0.0174958	0.0200178	0.0214456	0.0213055	0.0188764	0.0236842	0.0259647	0.0209927	0.0206455	0.0220825	0.0188279	0.0245399	0.014203	0.0225118	0.0184537	0.0243064	0.0143105	0.0189994	0.0288052	0.00431034	0.0318054	0.0144723	0.0151336	0.0196127	0.0250836	0.0196005	0.0149593	0.00531915	0.00934579	0.0153846
	0.0196038	0.0230523	0.0179037	0.0203284	0.0183939	0.0217028	0.0188206	0.0235454	0.0171966	0.0204022	0.0184249	0.0174688	0.0199425	0.0213072	0.0212993	0.0187177	0.0236461	0.0258481	0.0209271	0.0205623	0.0219441	0.0187708	0.0244712	0.0141962	0.0223249	0.0183135	0.0241929	0.0137628	0.0187525	0.0286667	0.00429185	0.0317578	0.0144431	0.014902	0.0195849	0.0248227	0.0189137	0.0149453	0.00531915	0.00934579	0.0151515
	0.0194105	0.0229702	0.0178759	0.0203237	0.0183688	0.0215374	0.0183602	0.0234722	0.0170965	0.0203116	0.018424	0.0173719	0.0197248	0.0212975	0.0212766	0.018603	0.0235294	0.0257073	0.0208034	0.0204114	0.0215373	0.0187573	0.0244334	0.0141677	0.0222476	0.0181963	0.0241463	0.0137525	0.0184843	0.0284706	0.0042735	0.0316421	0.0140127	0.0147009	0.0194004	0.0247312	0.0188362	0.014841	0.00529101	0.00930233	0.0151515
	0.0194076	0.0228651	0.0176949	0.0203046	0.0182524	0.0212766	0.0183037	0.0231365	0.016975	0.0202946	0.0183425	0.0170778	0.0194595	0.0212316	0.0212406	0.0185789	0.0234694	0.0254692	0.0205641	0.0204101	0.0215283	0.0186554	0.0243902	0.0140582	0.0218978	0.0181204	0.0239271	0.01346	0.0177305	0.0284266	0.00425532	0.0312166	0.0138946	0.01455	0.0187464	0.0242107	0.0184237	0.014835	0.00526316	0.00929368	0.0151515
	0.0193795	0.0227904	0.017662	0.0202768	0.0182257	0.0212766	0.018241	0.0229042	0.0166667	0.0202631	0.0183088	0.0170535	0.0194034	0.0211864	0.0210982	0.0185012	0.0232558	0.0254381	0.0205158	0.0203046	0.0213491	0.0185822	0.0240964	0.0139762	0.0218833	0.0179748	0.0234475	0.0133834	0.0176871	0.0281532	0.00423729	0.0310711	0.0138889	0.0144578	0.0185432	0.0239746	0.018078	0.0147808	0.00526316	0.00925926	0.0147059
	0.0192963	0.0227076	0.0176571	0.0202619	0.0181755	0.0212579	0.0181197	0.0224825	0.0166667	0.020202	0.0183018	0.0169784	0.0194032	0.0211839	0.0209387	0.0184543	0.0232092	0.0252281	0.0204833	0.0202548	0.0213274	0.0185774	0.0240651	0.0138889	0.0217944	0.0178108	0.0231827	0.0132743	0.017638	0.0281108	0.00423729	0.031025	0.0138422	0.0144563	0.0182834	0.023315	0.0178001	0.014733	0.00505051	0.00914634	0.0147059
	0.0192503	0.0226857	0.0174129	0.0200465	0.0181248	0.0210343	0.0181109	0.0223706	0.0165746	0.0201986	0.0182482	0.0169492	0.019339	0.0211356	0.0208152	0.0184502	0.0231788	0.0251256	0.0204082	0.0202343	0.0213112	0.0185671	0.0237823	0.0138787	0.0214355	0.0177416	0.0229682	0.0132591	0.0176211	0.0279412	0.00420168	0.0309798	0.0138082	0.0142698	0.0182482	0.0229087	0.0172414	0.01473	0.00502513	0.00909091	0.0147059
	0.0190938	0.0226527	0.0173622	0.019991	0.018018	0.0208768	0.0181068	0.0223041	0.0164835	0.0196721	0.0181717	0.0168893	0.0192794	0.0209908	0.0206921	0.018351	0.0230986	0.025097	0.020316	0.0200468	0.0213037	0.0185185	0.0237366	0.0138392	0.0213869	0.0177377	0.0228815	0.0131684	0.017585	0.0276433	0.00420168	0.0308067	0.0137984	0.0142533	0.018022	0.0227273	0.0169981	0.0147145	0.005	0.00909091	0.0144928
	0.0188244	0.0225791	0.017358	0.0198503	0.0179567	0.0208563	0.0180851	0.0221052	0.0163934	0.0195977	0.0179835	0.0168213	0.0192349	0.0206262	0.0206195	0.0182927	0.0230179	0.025	0.0200669	0.0199979	0.0212963	0.0178725	0.0232767	0.0138157	0.0211116	0.0177285	0.0224801	0.0129534	0.0175439	0.0275081	0.0041841	0.0307692	0.0137853	0.01417	0.0179426	0.0227273	0.0169312	0.0146621	0.005	0.00905797	0.0144928
	0.0187209	0.0225374	0.0173108	0.0195874	0.0179219	0.0208333	0.0179831	0.0219972	0.0162471	0.0193798	0.0178862	0.0165509	0.0191147	0.0205073	0.02061	0.0182292	0.0230038	0.0247642	0.0198706	0.0198675	0.0212766	0.0178571	0.0231023	0.0137652	0.0210632	0.0176744	0.0224519	0.0127029	0.0174455	0.0274207	0.004158	0.0307692	0.0136612	0.0138191	0.0178571	0.0226493	0.0165775	0.014622	0.00497512	0.00901713	0.0144928
	0.0186897	0.0225296	0.0173038	0.0195616	0.0178892	0.0206816	0.017976	0.0215013	0.0162162	0.0193664	0.0178663	0.0165408	0.018799	0.0204661	0.020202	0.0181237	0.0229412	0.0247585	0.0198188	0.0198675	0.0211232	0.01767	0.0230786	0.0137624	0.0210352	0.0175822	0.0221496	0.0126422	0.0174081	0.0269876	0.00414938	0.0304463	0.0135135	0.013798	0.0178056	0.0224448	0.0165746	0.0145619	0.00492611	0.00900901	0.0144928
	0.0185521	0.022441	0.0172687	0.0195553	0.0175852	0.0204082	0.0178412	0.0214078	0.0161499	0.0193529	0.0178499	0.0165336	0.0187001	0.0204082	0.0201255	0.0180621	0.0229342	0.0246052	0.019742	0.0198675	0.0209477	0.0175591	0.0230744	0.0135354	0.0210158	0.0175439	0.0219462	0.0126396	0.0171584	0.0269231	0.00414938	0.030303	0.013446	0.0136986	0.0177109	0.0223363	0.0157658	0.0145612	0.00471698	0.00900901	0.0142857
	0.0184405	0.0224033	0.0172453	0.0194588	0.017555	0.0204082	0.0178242	0.0213656	0.0161157	0.0193022	0.0178256	0.0165124	0.0185302	0.0203341	0.020096	0.018049	0.022869	0.0244733	0.0195155	0.0197493	0.0208866	0.0175308	0.0226165	0.0135243	0.020612	0.0175334	0.0218837	0.01262	0.017097	0.0269213	0.00414938	0.0298507	0.0132117	0.0136986	0.0176783	0.0220877	0.0157525	0.0144361	0.00469484	0.00898204	0.0142857
	0.0183893	0.0223647	0.0172375	0.0194175	0.0174579	0.0202359	0.0177839	0.0211736	0.0161123	0.019005	0.0178158	0.0164453	0.0184466	0.0201149	0.0197044	0.0180332	0.0225681	0.02443	0.0193825	0.0196213	0.0208084	0.0174408	0.0225637	0.0135135	0.020555	0.0174987	0.0217984	0.0125049	0.0169492	0.0265933	0.00413223	0.0296518	0.013132	0.0136752	0.0173776	0.0217114	0.0155923	0.0144084	0.00469484	0.00895522	0.0142857
	0.0183537	0.0223416	0.0170374	0.0193133	0.0174426	0.0202257	0.0176705	0.0211305	0.0160738	0.0188223	0.0177486	0.0163934	0.0184071	0.0191388	0.0194978	0.0178124	0.0225532	0.02402	0.0193671	0.0195101	0.0208044	0.0172372	0.0222824	0.0133675	0.0205301	0.0174638	0.0214769	0.0125	0.0168966	0.026455	0.00413223	0.0295272	0.013077	0.0135699	0.0171233	0.0215781	0.0155039	0.0143305	0.00469484	0.00893855	0.0142857
	0.0183004	0.0223404	0.0168993	0.0192826	0.0173705	0.0199898	0.0176471	0.0209424	0.0159865	0.0188004	0.0177215	0.0162602	0.0184049	0.0191278	0.0194518	0.0177515	0.0224498	0.0239822	0.0192985	0.0194805	0.0207523	0.0166942	0.0218341	0.0133241	0.0202672	0.0174545	0.021443	0.0124611	0.0166945	0.0261888	0.00413223	0.0291262	0.0129641	0.0135451	0.0167439	0.0198977	0.0154941	0.0142857	0.0046729	0.00890208	0.0140845
	0.0181681	0.022323	0.016846	0.0187842	0.0172884	0.0199816	0.0175953	0.0209424	0.0159713	0.0187251	0.01766	0.0162588	0.0182044	0.0190959	0.0193402	0.0176211	0.0223404	0.0239697	0.0192713	0.0193047	0.0207222	0.016671	0.0218048	0.0132278	0.0202109	0.01745	0.0213801	0.0124339	0.0166929	0.0261215	0.00411523	0.0290886	0.0128172	0.013544	0.0163432	0.019782	0.0148437	0.014259	0.00462963	0.00877193	0.0140845
	0.018093	0.0222913	0.0168185	0.0187824	0.0172513	0.0196078	0.0175879	0.0208302	0.0159538	0.0186866	0.0176511	0.0162358	0.0181849	0.0187036	0.0192576	0.0176118	0.0222772	0.0238139	0.0188882	0.0192726	0.0205466	0.0166364	0.0216606	0.013202	0.0199421	0.0174482	0.02114	0.01235	0.0164204	0.0261168	0.00411523	0.0285344	0.0125249	0.0134934	0.0160199	0.0197535	0.0145683	0.0142494	0.00452489	0.00873362	0.0138889
	0.0180862	0.0222656	0.0167755	0.0186017	0.0167064	0.0196078	0.0174773	0.0207964	0.0159468	0.0186864	0.0176484	0.0162051	0.0181518	0.0186695	0.0191781	0.0175393	0.0222743	0.0237768	0.0188338	0.019201	0.0203592	0.0163798	0.0215943	0.0131926	0.0197865	0.0173726	0.0208192	0.0122699	0.0163934	0.0260599	0.00409836	0.0283049	0.0124533	0.0133737	0.0159925	0.0183779	0.0144395	0.0142035	0.00442478	0.00869565	0.0138889
	0.0180818	0.0219245	0.0167557	0.0185185	0.0165666	0.0195802	0.0174609	0.0205723	0.015932	0.0185471	0.0176355	0.016185	0.0180879	0.0186573	0.0191189	0.0175149	0.0222734	0.0235542	0.0185312	0.019166	0.0203322	0.0163502	0.0215112	0.0131687	0.0196771	0.017177	0.0204344	0.0122525	0.0163419	0.0258566	0.00409836	0.0281354	0.0124069	0.0133709	0.0159917	0.0179692	0.0143809	0.0141844	0.00440529	0.00869565	0.0138889
	0.018054	0.0218715	0.0167431	0.0184255	0.0164677	0.0195329	0.0173306	0.0204216	0.0158204	0.0185426	0.0175254	0.0161697	0.0180682	0.0185497	0.0190427	0.0174304	0.0222623	0.0234487	0.0184017	0.0189079	0.0202312	0.0163488	0.0214286	0.0131082	0.0196721	0.0169112	0.020255	0.0121521	0.016193	0.0258246	0.00409836	0.0280193	0.0123071	0.0133333	0.0159817	0.017768	0.0143155	0.014145	0.0041841	0.00869565	0.0136986
	0.0180038	0.0218511	0.0166301	0.0181243	0.016361	0.0195242	0.0171982	0.0204098	0.0157296	0.0184719	0.0175097	0.0161431	0.0179102	0.0183573	0.0189097	0.0173644	0.0220588	0.023221	0.018346	0.0188971	0.020216	0.0161652	0.0212014	0.0129265	0.0195735	0.016835	0.0201493	0.012135	0.0161383	0.0257685	0.00409836	0.0272895	0.0122987	0.0131492	0.015894	0.0171821	0.014269	0.014115	0.0041841	0.00865801	0.0136986
	0.0179442	0.0217826	0.0165946	0.0180252	0.0163303	0.019329	0.0171913	0.0203698	0.0156221	0.018141	0.0174524	0.0161418	0.0178731	0.0181074	0.0187207	0.0173024	0.0219479	0.0228091	0.0183341	0.0187699	0.0201803	0.016134	0.021146	0.0128205	0.0192144	0.016791	0.0199158	0.0117302	0.0154332	0.0256371	0.00409836	0.0269231	0.0121302	0.0131397	0.0157189	0.0170139	0.0142594	0.0140885	0.00416667	0.00862069	0.0136986
	0.0179211	0.0216685	0.0165289	0.0180206	0.016317	0.0189791	0.0171405	0.0199318	0.0156069	0.0181249	0.0174277	0.0161316	0.0178571	0.0180899	0.018571	0.0171892	0.0219355	0.0227451	0.0183191	0.0187683	0.0201328	0.016075	0.0211433	0.0127656	0.0191304	0.0166127	0.0197248	0.0115793	0.0148439	0.025576	0.00408163	0.0269231	0.0120609	0.0130841	0.0155378	0.0166192	0.0141408	0.0140644	0.00416667	0.00854701	0.0135135
	0.0178977	0.021645	0.016451	0.0178571	0.0161999	0.0188867	0.0169492	0.019876	0.0155709	0.0180768	0.0174216	0.016093	0.0178141	0.0180605	0.0184434	0.0170464	0.0218688	0.0227273	0.0181992	0.0186272	0.0199567	0.0160484	0.02079	0.0126445	0.0190213	0.0165235	0.0195054	0.0114626	0.0147229	0.0254353	0.00408163	0.0268889	0.0119528	0.0126683	0.015375	0.0165845	0.0140496	0.0140562	0.00416667	0.00854701	0.0135135
	0.0178921	0.0215192	0.0163242	0.0178174	0.0159449	0.0188796	0.0168453	0.0197832	0.0155021	0.0178765	0.0173861	0.0159695	0.0176132	0.0179306	0.0184144	0.0170437	0.021721	0.0226453	0.0180389	0.0186098	0.0198248	0.0160188	0.0207051	0.0126285	0.0190184	0.0165196	0.0192923	0.0113952	0.0146765	0.0251779	0.00408163	0.0268519	0.0119323	0.0125628	0.0152566	0.0164573	0.013947	0.0139925	0.00414938	0.00847458	0.0131579
	0.017868	0.0213904	0.0163236	0.0176909	0.0159426	0.018724	0.0165981	0.019641	0.0154799	0.0176938	0.017341	0.0159435	0.0175439	0.0177556	0.018409	0.0169791	0.0215827	0.0226171	0.0180325	0.0183997	0.019802	0.0159325	0.0204619	0.0125974	0.0189845	0.0165173	0.0192459	0.0113662	0.014658	0.0249128	0.00408163	0.0267764	0.0118429	0.0123861	0.0150188	0.0163317	0.0139018	0.0139527	0.00413223	0.00841622	0.012987
	0.0178306	0.0212014	0.0162613	0.0176849	0.0159046	0.0183964	0.0164443	0.0194492	0.0154424	0.0175439	0.0172859	0.0159433	0.017521	0.0177417	0.0183508	0.0169454	0.0215686	0.0223504	0.01766	0.0183521	0.019774	0.0159151	0.0201662	0.0125878	0.0189289	0.0164037	0.0190414	0.011366	0.0142566	0.0248254	0.00406504	0.0266667	0.0113846	0.0123065	0.0149181	0.0160428	0.0138889	0.0139315	0.00411523	0.00840336	0.0126582
	0.0177742	0.0211968	0.0162433	0.0176619	0.0157895	0.0183211	0.0163803	0.0194294	0.0154035	0.0175439	0.0172048	0.0159236	0.0174958	0.0175124	0.0181564	0.0169154	0.0214765	0.0219183	0.0175913	0.0182882	0.0197641	0.0156522	0.020143	0.0125628	0.0188008	0.0163361	0.0186784	0.0112024	0.0141443	0.0246803	0.00406504	0.026598	0.0111826	0.0122988	0.0144231	0.0160209	0.0138408	0.0139276	0.00408163	0.00838574	0.0125
	0.017701	0.0211375	0.0162283	0.0176097	0.0157068	0.0181818	0.0163156	0.0193545	0.0153366	0.0172585	0.0171927	0.0158157	0.0173844	0.0174419	0.0179994	0.0168966	0.0214608	0.0217984	0.0175747	0.0182857	0.0196701	0.0155713	0.0200334	0.012173	0.0187713	0.0163345	0.0186107	0.011194	0.0141403	0.0245272	0.00406504	0.0264952	0.0110701	0.012291	0.0144033	0.0159151	0.013588	0.0139207	0.00406504	0.00833333	0.0125
	0.0176901	0.0210868	0.0162043	0.0174398	0.0155992	0.0180112	0.0163072	0.0192348	0.0153073	0.0172224	0.0171347	0.0156979	0.0173294	0.0172911	0.0177944	0.0164973	0.0214067	0.0217602	0.0175709	0.0182652	0.0196234	0.0155649	0.0198959	0.0121638	0.0185957	0.0162671	0.01858	0.0111321	0.0141343	0.0244742	0.00406504	0.0263158	0.010989	0.0122862	0.0143116	0.0158967	0.0135003	0.0138394	0.00403226	0.00833333	0.0125
	0.0176591	0.0210619	0.0160496	0.0173697	0.0154242	0.0178935	0.0161194	0.0190788	0.0152787	0.0172187	0.017094	0.0156958	0.0172414	0.0172911	0.0177811	0.0164696	0.0213008	0.0217391	0.0175562	0.0181488	0.0194786	0.0153367	0.0197842	0.0120885	0.018546	0.016129	0.0185639	0.0110947	0.0138889	0.0243296	0.00404858	0.0262339	0.0109872	0.0121602	0.014192	0.0155734	0.0132071	0.0138146	0.004	0.00829876	0.0125
	0.0175848	0.0209974	0.0160485	0.0173677	0.0153932	0.0177305	0.0161173	0.0189076	0.0152596	0.0171394	0.0170503	0.0156838	0.0171473	0.0171377	0.0177241	0.016463	0.0212629	0.0217031	0.0174868	0.0180797	0.0194144	0.0152109	0.019708	0.0120851	0.0183428	0.016096	0.0184147	0.0110759	0.0135374	0.0242074	0.00404858	0.0261937	0.010831	0.011888	0.0141468	0.0153448	0.0131792	0.0137195	0.00395257	0.00826446	0.0121951
	0.0175676	0.0209898	0.0160183	0.0173277	0.0153584	0.0177045	0.0161137	0.0188064	0.015194	0.0170976	0.0170384	0.0156627	0.0170667	0.017094	0.0175821	0.0163854	0.0210865	0.0215863	0.0174081	0.0179386	0.0194053	0.015015	0.0196445	0.0120787	0.0183028	0.0160219	0.0184052	0.010968	0.0135222	0.0241005	0.00404858	0.0260712	0.0107004	0.0118233	0.0141225	0.0149719	0.0129447	0.0136986	0.00380228	0.00826446	0.0121951
	0.0175579	0.0209751	0.0158194	0.0172639	0.0153056	0.0175631	0.0160772	0.0186916	0.0151865	0.0168663	0.0170089	0.0154492	0.0170543	0.016163	0.0175045	0.0163755	0.020979	0.0215134	0.0173094	0.0179028	0.0192774	0.0149771	0.0194878	0.0119713	0.0182524	0.0159803	0.0182537	0.0109119	0.0133988	0.0239202	0.00403226	0.026038	0.010692	0.0117594	0.0140556	0.0149051	0.0129032	0.0136712	0.00373134	0.00824176	0.0121951
	0.0175406	0.0209542	0.0157601	0.0172124	0.0152413	0.0175619	0.0160156	0.0186285	0.0151273	0.0168218	0.0170049	0.015394	0.0169697	0.0160579	0.0174097	0.0159929	0.0209713	0.0214937	0.0172781	0.0178909	0.0192484	0.0149539	0.0194128	0.0119665	0.0180375	0.015903	0.0180752	0.0108264	0.013368	0.0236075	0.00403226	0.0255341	0.0106882	0.011582	0.0140293	0.0145191	0.0128414	0.0136003	0.00373134	0.00823045	0.0120482
	0.0174966	0.0208196	0.0157254	0.0171709	0.0151295	0.0174944	0.0159521	0.0185707	0.0149373	0.0167715	0.0169707	0.0153859	0.0168599	0.015919	0.0173107	0.0159103	0.0208772	0.0214674	0.0171882	0.0176863	0.0191401	0.014942	0.0194116	0.0118825	0.0179695	0.0158546	0.018018	0.0108007	0.0131761	0.0234558	0.00403226	0.025466	0.0106865	0.0110294	0.0139844	0.0142566	0.0126984	0.01359	0.00371747	0.00816327	0.0120482
	0.0172641	0.0207268	0.0157181	0.0171103	0.0149767	0.0174672	0.0159236	0.018186	0.0149254	0.0166703	0.0169627	0.0153242	0.0167959	0.0158244	0.0172967	0.0158859	0.0207021	0.021319	0.0171146	0.017486	0.0190762	0.0149316	0.0193503	0.0117899	0.0178367	0.0158343	0.0179495	0.0106105	0.0130719	0.0232733	0.00401606	0.0247934	0.0106865	0.0110294	0.0139577	0.0142455	0.0126793	0.01359	0.00371747	0.00815217	0.0120482
	0.0172223	0.0206304	0.0156604	0.016926	0.0148728	0.0174671	0.0159048	0.0181207	0.0149254	0.0165903	0.0169065	0.0152722	0.0167891	0.015764	0.0171699	0.015858	0.0206805	0.0212037	0.017049	0.0173997	0.0189167	0.0149254	0.019284	0.0117647	0.0177983	0.0156721	0.0179088	0.0106105	0.0130163	0.0231954	0.00401606	0.0245009	0.0105587	0.0110266	0.0137312	0.0141384	0.0126777	0.013587	0.0037037	0.00813008	0.0120482
	0.0171588	0.0205825	0.0155447	0.0167763	0.014854	0.0174216	0.0156455	0.0180687	0.0149186	0.0164564	0.0168984	0.0152566	0.0167656	0.0157055	0.0170354	0.015748	0.0206704	0.0209049	0.0168385	0.0172876	0.0186296	0.0147609	0.0192616	0.011739	0.0177795	0.0154933	0.0179	0.0103746	0.0128721	0.0229585	0.00395257	0.0244984	0.010514	0.0110193	0.0134936	0.0139476	0.0126675	0.0135615	0.00369004	0.00807043	0.0119048
	0.0171512	0.0205797	0.0155001	0.0167358	0.0148075	0.0174174	0.015625	0.0180665	0.0148922	0.0164054	0.0168234	0.0152153	0.0167643	0.0155966	0.0170087	0.0155674	0.0205976	0.0206212	0.01659	0.0171659	0.0185676	0.0147512	0.0190497	0.0116858	0.0177395	0.0154259	0.0176574	0.0101793	0.012844	0.0227678	0.00390625	0.0244328	0.0104854	0.0109414	0.0133438	0.0136825	0.012621	0.0135369	0.00369004	0.00806452	0.011236
	0.0170019	0.0205601	0.0153846	0.0167197	0.0147348	0.0171512	0.0155902	0.0179954	0.0148842	0.0163831	0.0167364	0.0151859	0.0166976	0.0155345	0.0169601	0.015397	0.0205255	0.0204387	0.0165407	0.0169735	0.0185497	0.0146419	0.0189805	0.0116445	0.0176929	0.0152851	0.0176019	0.0100643	0.0126214	0.0225441	0.00389105	0.024355	0.0104167	0.0107169	0.0132567	0.0136073	0.0124481	0.013526	0.00367647	0.00805524	0.0104167
	0.0169846	0.0204696	0.0153605	0.0167081	0.0147059	0.0171084	0.0155429	0.0178291	0.0148194	0.0163156	0.0166781	0.0151515	0.0166849	0.0155039	0.0169462	0.0152781	0.0204429	0.0201342	0.0163996	0.0169567	0.0183794	0.0145689	0.0189697	0.0116279	0.0176101	0.0151818	0.0175117	0.0100503	0.0125549	0.0225	0.00387597	0.024149	0.0103865	0.0106927	0.0132339	0.0132474	0.0122735	0.0134913	0.003663	0.008	0.0103093
	0.0168384	0.0204047	0.0153072	0.0166113	0.014703	0.0169833	0.0155269	0.017619	0.014814	0.0162925	0.0165891	0.0151038	0.01657	0.0154321	0.0169361	0.0152644	0.0203971	0.0198955	0.0163607	0.0168501	0.0183698	0.014511	0.0189453	0.0115232	0.0175439	0.0151053	0.0174965	0.0100456	0.0125	0.02234	0.00381679	0.0238095	0.0102887	0.0106707	0.0131656	0.0128755	0.0122137	0.0133683	0.00364964	0.00765864	0.01
	0.016835	0.0203252	0.0151024	0.0165696	0.0146723	0.0169335	0.0155141	0.0174593	0.0147622	0.0161948	0.0164689	0.0150121	0.0164863	0.0150823	0.0167722	0.0149945	0.0203175	0.0196078	0.0163416	0.016592	0.0183566	0.0143938	0.0188967	0.0114745	0.0174596	0.0150565	0.0174146	0.0100367	0.0124481	0.0222597	0.00378788	0.023574	0.0102041	0.010574	0.0131579	0.0128345	0.0120598	0.013343	0.00364964	0.00765306	0.01
	0.0168276	0.0202775	0.0150831	0.0163954	0.0146242	0.016744	0.015392	0.0174584	0.0147601	0.016188	0.0164498	0.0148528	0.0164706	0.0150582	0.0167185	0.0149024	0.0201964	0.0195556	0.0162088	0.016522	0.0183446	0.0143811	0.0187026	0.0114685	0.0173536	0.0149471	0.0172414	0.00990099	0.0121317	0.0222222	0.00374532	0.0234497	0.010076	0.0104836	0.0130005	0.0127273	0.0118044	0.0132904	0.00362319	0.00763359	0.00980392
	0.0168044	0.0202557	0.0150292	0.0163652	0.0145405	0.0163934	0.0153621	0.0174381	0.0147294	0.0160643	0.0164425	0.0148515	0.0163934	0.0149311	0.0166608	0.0148756	0.0201718	0.0194471	0.0161255	0.0164759	0.0183425	0.0143785	0.018617	0.0114511	0.0172893	0.0148597	0.0172222	0.00987798	0.012119	0.0222046	0.00373134	0.0233677	0.0100487	0.0103829	0.0129469	0.0123754	0.011713	0.0131963	0.00362319	0.00757576	0.00970874
	0.0167922	0.0202375	0.014975	0.0163635	0.0145375	0.0163934	0.0153469	0.0173853	0.0146141	0.0160291	0.0164414	0.0148167	0.0163787	0.0148163	0.0166386	0.0148238	0.0201525	0.0194224	0.0160833	0.0163996	0.018161	0.0143616	0.0186029	0.0113493	0.0171296	0.014776	0.0171856	0.00977476	0.0121007	0.0221325	0.00371747	0.0229008	0.0100484	0.0103093	0.0127582	0.0122486	0.0116973	0.0131765	0.00361011	0.00749064	0.00970874
	0.0167545	0.0202338	0.0149624	0.0162519	0.0145228	0.0163934	0.0152819	0.0172718	0.0144928	0.0160007	0.0164206	0.0147853	0.0162918	0.0147009	0.0165352	0.0148026	0.0201465	0.0192691	0.0160625	0.0163155	0.0180838	0.0141844	0.0185955	0.01129	0.0171261	0.0147733	0.0165975	0.0097354	0.0120397	0.0220428	0.00371747	0.0225499	0.010035	0.0103081	0.0127077	0.0121622	0.0115357	0.013107	0.00361011	0.00746269	0.00961538
	0.0167264	0.0202312	0.0149489	0.01625	0.0144339	0.0163238	0.0152672	0.0172395	0.0144757	0.0159151	0.0163984	0.0147211	0.0162113	0.0146409	0.0165289	0.0147126	0.0201149	0.0192	0.0159053	0.0161865	0.0180711	0.0140086	0.0185185	0.0112583	0.0170219	0.0147638	0.0165766	0.00969126	0.011828	0.0218671	0.00369004	0.0225297	0.00997653	0.0100753	0.0126704	0.0121377	0.0114679	0.0130923	0.00361011	0.00746269	0.00961538
	0.016721	0.0202138	0.0148976	0.016165	0.0143857	0.0162391	0.015261	0.0171382	0.0143627	0.0159073	0.0163835	0.0146015	0.0161903	0.0146386	0.0165161	0.0147041	0.0200236	0.0191591	0.015873	0.016	0.0180624	0.0139201	0.0185157	0.0112537	0.0170113	0.0147493	0.0165746	0.00966944	0.0115307	0.0218509	0.003663	0.0224719	0.00990991	0.0100503	0.0122249	0.0121212	0.0114353	0.013046	0.00358423	0.00729927	0.00956938
	0.0165975	0.0201816	0.0148661	0.0161492	0.0143158	0.0161927	0.0152425	0.0170251	0.0142965	0.0158882	0.0163595	0.0145943	0.0161332	0.01457	0.0164691	0.0146678	0.0195977	0.0188043	0.0158524	0.0158371	0.0179192	0.0139165	0.0185144	0.0111684	0.0169492	0.014697	0.0164835	0.0094919	0.0115082	0.0218182	0.00358423	0.0224382	0.00986526	0.01	0.0121029	0.0120827	0.011357	0.012907	0.00355872	0.00722674	0.00913242
	0.0165895	0.0201681	0.0148213	0.0158859	0.0141204	0.0161527	0.0152085	0.0169693	0.0142661	0.0157322	0.0163396	0.0145526	0.0160173	0.0145532	0.016406	0.0146252	0.0195791	0.018617	0.0158469	0.0157219	0.0178458	0.0138443	0.0184557	0.0111622	0.0168729	0.0146722	0.0163934	0.00933908	0.0113636	0.0218097	0.00358423	0.0224	0.00984151	0.00993377	0.0120968	0.0118661	0.0112955	0.0129052	0.00342466	0.00714286	0.00900901
	0.0165862	0.0201544	0.0147486	0.0157093	0.0139672	0.0160996	0.0150905	0.0169522	0.014207	0.0156899	0.0162786	0.0145081	0.0159337	0.0144894	0.0162873	0.014505	0.0195465	0.0184993	0.0157572	0.0156585	0.0178453	0.0138187	0.0184443	0.0111266	0.0166793	0.0146535	0.0163371	0.0093035	0.0112273	0.0217949	0.0035461	0.0223813	0.00964912	0.00969541	0.0120712	0.0117906	0.0110375	0.0129048	0.0033557	0.00714286	0.00892857
	0.0165576	0.0201442	0.0147059	0.0156109	0.013956	0.015739	0.0149142	0.0169417	0.0140728	0.0156079	0.016129	0.0143406	0.015885	0.0144855	0.0161466	0.0144423	0.0194742	0.0184829	0.0157491	0.0156207	0.0178186	0.0137457	0.0184136	0.0108399	0.0165435	0.0146413	0.016121	0.00926518	0.0112251	0.0216066	0.00353357	0.0223661	0.00958543	0.00966894	0.0118027	0.0117611	0.0108865	0.0128363	0.00333333	0.00714286	0.00892857
	0.0165051	0.0201415	0.0146735	0.0154718	0.0138614	0.0157362	0.0148998	0.0169067	0.0140693	0.01547	0.016129	0.0143194	0.0158451	0.0144616	0.016129	0.0144144	0.0192864	0.0183321	0.0157369	0.015616	0.0178099	0.0137177	0.0183951	0.0107981	0.0164479	0.0145251	0.0161139	0.00916704	0.0111184	0.0215974	0.00353357	0.0223015	0.00957111	0.00960699	0.0117049	0.0117317	0.0108463	0.0127886	0.00322581	0.00704225	0.00884956
	0.0164391	0.0199206	0.0146648	0.0153627	0.0138212	0.015672	0.0148312	0.016858	0.0140254	0.015444	0.0161236	0.014262	0.0157799	0.0144404	0.016129	0.0144121	0.0192308	0.0183252	0.0157343	0.0156059	0.0176698	0.0136986	0.0183474	0.0107356	0.0164319	0.0144949	0.0160689	0.00908265	0.011087	0.0215311	0.00352113	0.0220382	0.00941797	0.00957086	0.0115938	0.0117302	0.0107854	0.0127524	0.00318471	0.00704225	0.00884956
	0.0164234	0.019714	0.0146628	0.0152862	0.0136972	0.015528	0.014826	0.0168103	0.0139898	0.0154433	0.0161058	0.0142268	0.0157175	0.0144124	0.0160075	0.0143385	0.0191847	0.0181742	0.015685	0.0155577	0.017539	0.0135468	0.0182977	0.0105932	0.0164118	0.0143705	0.0159986	0.00895656	0.0110852	0.0214205	0.00350877	0.0220241	0.009273	0.00953895	0.0115385	0.0116859	0.0107692	0.0127341	0.0031348	0.00704225	0.00884956
	0.0163795	0.0196569	0.0145544	0.0152338	0.0136938	0.0154135	0.0148187	0.0168011	0.0139763	0.0153846	0.0160563	0.0141718	0.015625	0.0142558	0.015926	0.0142613	0.019103	0.0181056	0.015659	0.015528	0.0174248	0.013399	0.0182815	0.0104992	0.0163629	0.0142888	0.0159744	0.0088845	0.0107656	0.021364	0.00350877	0.0219043	0.00924421	0.00940695	0.0112281	0.0114728	0.0107473	0.0126958	0.00311526	0.00694444	0.00869565
	0.0163592	0.0195884	0.0144896	0.0151546	0.0136846	0.0153846	0.0147965	0.0167896	0.0138713	0.0153636	0.0158471	0.0141557	0.015625	0.0142465	0.0158451	0.0142514	0.0189274	0.0180812	0.0156369	0.0153166	0.0174095	0.0133968	0.0182176	0.0104895	0.0161633	0.0142827	0.0159413	0.00883753	0.0107296	0.0212566	0.0034965	0.0218487	0.00919012	0.00940544	0.0111576	0.0113841	0.0107168	0.0125922	0.00309598	0.00694444	0.00862069
	0.0163542	0.0194948	0.0144342	0.0151515	0.0136737	0.0151039	0.0147942	0.0167339	0.0138365	0.0153416	0.0158035	0.014076	0.0153748	0.0141312	0.0157447	0.0142161	0.0187586	0.0180328	0.0156144	0.0152111	0.0173793	0.0133929	0.0182075	0.0104106	0.0161367	0.014218	0.0159123	0.00882801	0.0106816	0.0212034	0.0034965	0.0217391	0.00903614	0.00936856	0.0111347	0.0112792	0.010574	0.0125619	0.00304878	0.00689655	0.00862069
	0.0163343	0.0194704	0.0144161	0.0150981	0.0136528	0.0150723	0.0147691	0.0167193	0.0138221	0.015338	0.0157285	0.0140724	0.0152838	0.0139769	0.0157248	0.014163	0.0187581	0.0180146	0.0155497	0.0151638	0.017317	0.0132698	0.0181971	0.0103627	0.0160189	0.01417	0.015625	0.00880088	0.0105795	0.0209111	0.00348432	0.021267	0.00898345	0.00925926	0.0111343	0.011236	0.0103806	0.0125553	0.0028169	0.00689655	0.00854701
	0.0162726	0.0194313	0.0143885	0.0150857	0.0135706	0.0150602	0.0147482	0.0167053	0.0137931	0.015261	0.0156036	0.0140399	0.015262	0.0138968	0.0155959	0.0140674	0.0187008	0.0179225	0.0154847	0.0150838	0.0172393	0.0130885	0.0181915	0.0103525	0.0158544	0.0141447	0.0152542	0.00873416	0.0104712	0.020848	0.00348432	0.0212282	0.00897302	0.00911483	0.011097	0.0111233	0.0103755	0.0125472	0.0027027	0.00675676	0.00840336
	0.0162557	0.0193848	0.0143849	0.0150738	0.0135453	0.0150273	0.0147109	0.0166667	0.0137619	0.0150806	0.015582	0.0140289	0.0151782	0.0138889	0.0154594	0.0140524	0.0186821	0.0179211	0.0154705	0.0148515	0.0172093	0.0130814	0.0181836	0.0103216	0.0158249	0.014093	0.0152198	0.00870406	0.0104275	0.0208229	0.00347222	0.0212014	0.00894454	0.00897826	0.0110803	0.010582	0.0103644	0.0124965	0.0027027	0.00674157	0.00833333
	0.0162364	0.019245	0.0143816	0.0150589	0.013535	0.0149597	0.0146723	0.0166238	0.0137221	0.0150359	0.0154452	0.0140045	0.0151712	0.0138853	0.0153715	0.0139917	0.0186441	0.0178285	0.0154363	0.0148084	0.0171715	0.0130293	0.018143	0.0102754	0.0157113	0.0140897	0.0151745	0.00869565	0.0103359	0.0205869	0.00347222	0.021087	0.00890263	0.00879121	0.0108685	0.010492	0.0102283	0.0124913	0.00268097	0.00672043	0.00833333
	0.01606	0.0192334	0.0143556	0.0150519	0.013445	0.0149254	0.0146256	0.0166122	0.0137121	0.015035	0.0152632	0.0139379	0.0150957	0.0137552	0.0152385	0.0139822	0.018598	0.0176943	0.0153101	0.0147797	0.0171702	0.0130252	0.0180166	0.0100822	0.0156951	0.0140598	0.0150659	0.00864055	0.0103199	0.0205038	0.00346021	0.0210773	0.00889152	0.00878156	0.0106684	0.0102983	0.0101905	0.0124855	0.00251889	0.00671141	0.00826446
	0.0160567	0.0192221	0.0143551	0.0150448	0.0131784	0.0149254	0.014625	0.0165739	0.0136986	0.0148738	0.0151699	0.0138128	0.0150807	0.0136661	0.0151515	0.0139769	0.0185615	0.0173337	0.014998	0.0145745	0.0171674	0.0129905	0.0179606	0.0100671	0.0155356	0.0140576	0.01503	0.00863558	0.0103093	0.0203095	0.00344828	0.0208701	0.00883652	0.00865651	0.0106259	0.0102236	0.0100923	0.012418	0.0025	0.00666667	0.00819672
	0.0160085	0.0191775	0.0143288	0.0150401	0.0129096	0.0149218	0.0145955	0.0165593	0.0136501	0.0147209	0.0151272	0.0137354	0.015	0.0136612	0.0151316	0.0139094	0.01849	0.0173207	0.0149935	0.0145455	0.017149	0.012987	0.0179153	0.0100461	0.0155148	0.0140515	0.0149142	0.00852087	0.0101934	0.020202	0.00344828	0.0207684	0.00881945	0.00860357	0.0106126	0.0102041	0.00978474	0.0123372	0.00246914	0.00657895	0.00813008
	0.0159803	0.019136	0.0142793	0.0149493	0.0128709	0.0148771	0.0145793	0.0164671	0.0136378	0.0146952	0.0151263	0.0137127	0.0147987	0.0136437	0.0150581	0.013826	0.0182167	0.0173077	0.0149254	0.0144353	0.0170648	0.012987	0.0178979	0.0100167	0.0154068	0.0139276	0.0149095	0.00848861	0.010101	0.0201893	0.00344828	0.0206483	0.00872898	0.00858863	0.0106118	0.010084	0.00954762	0.0123251	0.00246305	0.00649351	0.008
	0.0159642	0.0191142	0.0142581	0.0149449	0.0128477	0.0146808	0.0145659	0.0164453	0.0135601	0.0146912	0.0150068	0.0136792	0.0147752	0.0135875	0.01499	0.0138095	0.0181637	0.0169343	0.0148769	0.0143315	0.0170177	0.0129287	0.0178571	0.0100086	0.0152895	0.0138486	0.0147499	0.00843684	0.010101	0.0199241	0.00344828	0.0206155	0.00871632	0.00852818	0.0106045	0.01006	0.00950529	0.0122919	0.00244499	0.00646552	0.00793651
	0.015949	0.0190718	0.0142208	0.0149347	0.0127849	0.0145897	0.014546	0.0164261	0.0135409	0.0145967	0.0150065	0.0136309	0.0147283	0.0135311	0.0148832	0.0137798	0.0181504	0.0168701	0.014869	0.0142651	0.01697	0.0129275	0.0178492	0.00996543	0.0152413	0.0138462	0.0146883	0.00842697	0.0100756	0.0197078	0.00343643	0.0204566	0.00865026	0.00851466	0.0104793	0.0100566	0.00947329	0.0122896	0.00230947	0.00642398	0.00775194
	0.0159258	0.0190266	0.0141759	0.0149117	0.0127073	0.0144832	0.0145153	0.0162169	0.0135019	0.014553	0.014997	0.0135908	0.0147216	0.0135135	0.0148459	0.0136455	0.0180397	0.0167677	0.0148498	0.0142469	0.0169279	0.0129032	0.0178167	0.00988764	0.0152355	0.0137966	0.0146871	0.00838192	0.0100685	0.0196078	0.00343643	0.0203083	0.00859375	0.00841982	0.010384	0.0100376	0.00942685	0.0122691	0.00229358	0.00641026	0.00769231
	0.0159251	0.0189524	0.0141692	0.0148203	0.0126445	0.0144784	0.0144519	0.0160954	0.0134563	0.0144711	0.0149967	0.0135682	0.0146517	0.0135121	0.0148243	0.0136252	0.0180103	0.016726	0.0148336	0.0142358	0.0168445	0.012879	0.0178029	0.00976778	0.0151615	0.01378	0.0144869	0.00836528	0.00997506	0.019601	0.00343643	0.0202899	0.00848856	0.00828443	0.0103247	0.00980392	0.00942127	0.0122458	0.00228833	0.00638978	0.0075188
	0.0158896	0.0189333	0.014	0.0146727	0.0126001	0.0144516	0.0144446	0.01606	0.0134031	0.0144599	0.0149646	0.0135047	0.0146246	0.0135045	0.0145349	0.013544	0.0179445	0.0165954	0.0147776	0.0140577	0.0166667	0.0128755	0.0177854	0.00970515	0.0151111	0.013766	0.0143885	0.00835592	0.00996016	0.0195857	0.00342466	0.0200871	0.00847675	0.00819062	0.0103093	0.00970235	0.00938315	0.0122241	0.00228311	0.00638978	0.00746269
	0.0158461	0.0189222	0.0139707	0.0146543	0.0125258	0.0144187	0.0144418	0.0160444	0.0132795	0.0144352	0.014876	0.0134989	0.0144928	0.0134486	0.0145236	0.0135301	0.0178789	0.016581	0.0146712	0.0140386	0.0166667	0.0128582	0.0177658	0.00970217	0.0150774	0.0137559	0.0143788	0.00834492	0.00990854	0.019452	0.00342466	0.02	0.00844872	0.00815739	0.0102977	0.00943179	0.00906904	0.0121951	0.00228311	0.00632911	0.00740741
	0.0158353	0.0188352	0.0139183	0.0145701	0.0124877	0.0142405	0.014383	0.0160233	0.0132115	0.0143623	0.0148148	0.0134683	0.0144825	0.0133435	0.0145081	0.0135209	0.0178658	0.0165433	0.0145469	0.0137552	0.0165266	0.0128232	0.0176071	0.00959808	0.0150094	0.0136351	0.0142631	0.00831093	0.00990449	0.0194253	0.00341297	0.0197119	0.00840532	0.0081503	0.0102041	0.00928382	0.00904272	0.0121102	0.0021692	0.00632911	0.00740741
	0.0157806	0.0188057	0.0139156	0.0144709	0.012436	0.0141313	0.0143563	0.0160192	0.0132082	0.0142878	0.0147884	0.0134279	0.0144175	0.0132979	0.0144005	0.013501	0.0176471	0.0164353	0.0144698	0.0136997	0.0164811	0.0128066	0.0175229	0.00951607	0.0149899	0.0135904	0.0141605	0.0082713	0.0098668	0.0192081	0.00340136	0.0196456	0.00823691	0.00814815	0.0101917	0.00906002	0.00900901	0.0120645	0.00215517	0.00628931	0.00704225
	0.0157736	0.0188044	0.0138398	0.0144561	0.012415	0.0138408	0.0143361	0.0159984	0.0131614	0.0141863	0.0147385	0.0134242	0.0144056	0.0132933	0.0143942	0.0134443	0.0174905	0.0164319	0.014437	0.013593	0.0164302	0.0127796	0.0174945	0.00942751	0.0149852	0.0133429	0.0141294	0.00825549	0.00967906	0.019012	0.00338983	0.0196078	0.00815419	0.0080387	0.0101351	0.00902613	0.00885296	0.0120628	0.00215054	0.00627943	0.00699301
	0.0157213	0.0187511	0.0137162	0.0144453	0.0123649	0.0137395	0.0142646	0.0158875	0.0131579	0.0139898	0.0147363	0.0133919	0.014193	0.0132836	0.0142575	0.0134409	0.0174238	0.0163934	0.0143349	0.0135924	0.0162791	0.0126358	0.0174419	0.00941567	0.014983	0.0132767	0.0141184	0.00823772	0.00965058	0.0189718	0.00338219	0.0195637	0.00811486	0.00798403	0.00997151	0.00897613	0.00870163	0.0119866	0.00214592	0.00627615	0.00689655
	0.0157009	0.0186499	0.0137041	0.0144216	0.0122963	0.0136761	0.0141888	0.0158752	0.0131509	0.0138587	0.0147282	0.0133829	0.0139373	0.0132769	0.0142515	0.0134255	0.0173053	0.016366	0.0142898	0.0135811	0.016275	0.0126141	0.0172467	0.00939394	0.0148437	0.0131965	0.0140998	0.00813008	0.00963303	0.0188466	0.003367	0.0195498	0.0080872	0.00792341	0.00996076	0.00882103	0.00861678	0.0119533	0.00214133	0.00625	0.00680272
	0.0156695	0.0186469	0.0136248	0.0144141	0.0122725	0.0135894	0.014157	0.0158629	0.013116	0.0137487	0.0146628	0.0132906	0.0138382	0.0132768	0.0142063	0.0133921	0.016984	0.0160628	0.014215	0.0134345	0.0162602	0.0125725	0.017183	0.00937866	0.0148005	0.0131656	0.0140797	0.00812147	0.0096225	0.0188335	0.003367	0.0194903	0.00802773	0.00787402	0.00992556	0.00882045	0.00860626	0.0119363	0.00213675	0.00621118	0.00680272
	0.0155614	0.0186074	0.0136182	0.0143833	0.0121187	0.0135237	0.0141077	0.0157541	0.0130994	0.0136857	0.014553	0.0132564	0.0137945	0.0132743	0.0141994	0.0133621	0.0169492	0.0158803	0.0141643	0.0134345	0.0162471	0.0125042	0.0171306	0.00936995	0.0147908	0.0130909	0.0140368	0.00811574	0.00959233	0.018723	0.0033557	0.0193528	0.0079807	0.00775675	0.00970979	0.00881473	0.00856468	0.0119323	0.0021322	0.00617284	0.00671141
	0.0155515	0.0185688	0.0136014	0.0143824	0.0120936	0.0134605	0.0141066	0.0156854	0.013036	0.0136046	0.0144338	0.0132535	0.0137489	0.0132007	0.0141857	0.0133456	0.0168971	0.0158325	0.0141386	0.0133299	0.016204	0.0122831	0.0171131	0.0093527	0.0144969	0.0130741	0.0140009	0.00804329	0.00928382	0.018594	0.00334448	0.0192793	0.00794834	0.00769345	0.00960081	0.00863132	0.00842584	0.0119166	0.00212314	0.00617284	0.00657895
	0.0154964	0.0184786	0.0135856	0.0143296	0.0120461	0.0134312	0.014099	0.0155837	0.012987	0.0135219	0.0143648	0.013212	0.0137286	0.013041	0.0141844	0.0133156	0.0168242	0.0155785	0.014013	0.0130396	0.0161692	0.0122826	0.0171103	0.00931459	0.0144749	0.0130579	0.0139735	0.00803571	0.00914381	0.0185634	0.00333333	0.0191071	0.00791139	0.00754976	0.00958961	0.00856124	0.00839748	0.0118608	0.00211416	0.00613497	0.00632911
	0.0154367	0.0184729	0.0135776	0.0142889	0.0119868	0.0132822	0.0140977	0.0155556	0.0129656	0.0134765	0.01429	0.0131882	0.0136895	0.0129702	0.0141104	0.0133125	0.0167224	0.0153208	0.0139515	0.0129803	0.0161587	0.0122639	0.0169753	0.00923191	0.0144617	0.0130555	0.0137038	0.00801213	0.00910865	0.0185494	0.00333333	0.0190355	0.00790979	0.00736976	0.00957396	0.0084507	0.00838574	0.0117974	0.00208768	0.00613497	0.00625
	0.0154162	0.0183486	0.0135501	0.0142396	0.0119767	0.0132096	0.0140845	0.0155502	0.0127165	0.0133188	0.0139174	0.0131363	0.0136127	0.0129188	0.0141019	0.0132361	0.0166898	0.0148733	0.0138889	0.0129112	0.0158537	0.0121753	0.0169694	0.00923173	0.01446	0.0130098	0.0136655	0.00789303	0.00900901	0.0185257	0.00333333	0.0190353	0.00787075	0.00735681	0.00956359	0.00841852	0.00832937	0.0117773		0.00613497	0.00621118
	0.0153974	0.0182759	0.0135276	0.0140078	0.0119684	0.0131902	0.0140759	0.0154976	0.0127162	0.0133038	0.0139173	0.0131279	0.0135956	0.0128877	0.0140187	0.0132093	0.0166667	0.0147799	0.0138504	0.0128999	0.0158192	0.0121267	0.0169252	0.00922084	0.0144174	0.0129887	0.0136505	0.00781686	0.00898876	0.0184355	0.00333333	0.0190217	0.00784519	0.00733297	0.00951475	0.00841607	0.00827749	0.0117754		0.00613497	0.00621118
	0.0153924	0.0182491	0.0134533	0.0139581	0.0119489	0.0131714	0.0140584	0.0154419	0.0126504	0.0132602	0.0139089	0.0131165	0.0135231	0.0128824	0.0139829	0.0131865	0.0166163	0.0147021	0.0137601	0.0128302	0.0157895	0.0120724	0.0169247	0.00921187	0.0142959	0.0129303	0.0136359	0.00762161	0.00892857	0.0183392	0.00332226	0.0189282	0.0076956	0.00725995	0.00949367	0.00838826	0.00820448	0.0117663		0.00608519	0.00617284
	0.01529	0.0182436	0.0133519	0.0139467	0.0117405	0.0131566	0.0140187	0.0154148	0.012632	0.013258	0.0138642	0.0130391	0.0135156	0.0127054	0.0139057	0.0130456	0.0165746	0.0145631	0.0137532	0.012624	0.015748	0.0120659	0.0168804	0.00918836	0.0142487	0.0128628	0.013624	0.00757576	0.00886739	0.0182944	0.00332226	0.0188442	0.00765607	0.00721953	0.00945811	0.00837433	0.00813927	0.0117532		0.00608519	0.00613497
	0.0152471	0.0182199	0.0133308	0.013938	0.0116804	0.012987	0.0139252	0.0151491	0.0125115	0.0132578	0.0138474	0.0130307	0.013463	0.0126582	0.0138838	0.0129834	0.016318	0.0145151	0.0137093	0.0126011	0.0156831	0.0120482	0.0168154	0.00918476	0.0141903	0.0128586	0.0135435	0.00756193	0.00882353	0.0182696	0.00332226	0.0188125	0.00764147	0.00714286	0.00944237	0.00833333	0.00810979	0.0117261		0.0060652	0.00606061
	0.0151695	0.0181573	0.0133132	0.0139274	0.0116395	0.0129785	0.0138519	0.0150761	0.0125016	0.0132351	0.0137446	0.0130187	0.013419	0.0125755	0.0138158	0.0129407	0.016309	0.0145089	0.0136201	0.0125625	0.0156658	0.0120053	0.0168109	0.00917679	0.0141788	0.0128332	0.0135305	0.00750188	0.00878972	0.0182511	0.00332226	0.0186954	0.00753084	0.00704225	0.00914775	0.00832282	0.00807175	0.0117206		0.00606061	0.00595238
	0.0151142	0.0181164	0.0131796	0.0138889	0.0114187	0.0129553	0.0137435	0.0150351	0.0124481	0.0132222	0.0137363	0.0129851	0.0134103	0.0125563	0.0136444	0.0129199	0.0162492	0.0144859	0.0135945	0.0125547	0.015625	0.0119392	0.0167758	0.00907566	0.014161	0.0127291	0.0135135	0.00741627	0.00878294	0.0181603	0.00331675	0.0186667	0.00748023	0.00701023	0.0091442	0.00825168	0.00791452	0.0116632		0.0060241	0.00584795
	0.01509	0.0180804	0.0131646	0.0138656	0.0113747	0.0129187	0.0136822	0.0149542	0.0123571	0.0131926	0.0137132	0.0129702	0.0133905	0.0124898	0.013587	0.0128747	0.0161943	0.0143693	0.0135168	0.0124629	0.0156094	0.0118769	0.0167677	0.00904782	0.014017	0.0126618	0.0135135	0.00740491	0.00878294	0.0181514	0.00331126	0.0186667	0.00745983	0.00699606	0.00908469	0.00809717	0.00789474	0.0116327		0.0060241	0.00584795
	0.0150578	0.0180697	0.0131425	0.0138568	0.0113728	0.0128367	0.0136561	0.014892	0.0123242	0.0131802	0.0137053	0.0129384	0.0133879	0.0123916	0.0133962	0.0127854	0.0161601	0.0143043	0.0135023	0.0124113	0.0155902	0.0118564	0.0166933	0.00902062	0.0139766	0.0126462	0.0134451	0.00732984	0.0087236	0.0179856	0.00331126	0.0185529	0.0074415	0.00698603	0.008866	0.00806452	0.00787075	0.0116279		0.00598802	0.00584795
	0.0150376	0.0180063	0.013094	0.0136674	0.0113407	0.0127725	0.0136322	0.0148891	0.0122858	0.0131332	0.0136986	0.0128882	0.013308	0.0123729	0.0133446	0.0127562	0.0160128	0.0142946	0.0134771	0.0123341	0.0155895	0.0118245	0.0166838	0.00890641	0.0139496	0.0124611	0.0133722	0.00730769	0.00872324	0.0179664	0.00330033	0.0184417	0.0074224	0.00696415	0.00878033	0.00802792	0.00783801	0.0115863		0.00595238	0.00574713
	0.015027	0.0179763	0.0130782	0.0136203	0.0113298	0.0127572	0.0135002	0.0148292	0.0121951	0.0130431	0.0136625	0.0128308	0.0132904	0.0123486	0.0133387	0.0127404	0.015873	0.0142235	0.0134695	0.0122581	0.0155642	0.011811	0.016659	0.00885468	0.0138827	0.0124427	0.0132529	0.00723012	0.00870196	0.0179623	0.00327869	0.0184393	0.00741198	0.00695074	0.00863132	0.00802139	0.00782779	0.0115419		0.00595238	0.00552486
	0.015025	0.0178863	0.0129955	0.0136187	0.0113122	0.0127097	0.0134478	0.0148189	0.0121856	0.012987	0.0136136	0.0128	0.0131899	0.0123013	0.0132569	0.0127334	0.0158425	0.014217	0.0134435	0.0121677	0.0155239	0.0118047	0.0165394	0.0088363	0.0137195	0.0124342	0.0131829	0.00721409	0.00863931	0.0179592	0.00325733	0.0183587	0.00739317	0.00691452	0.0086273	0.00801925	0.0078125	0.0115416		0.00591716	0.00543478
	0.014997	0.0178759	0.0129719	0.0135659	0.0112755	0.0127008	0.0134023	0.0148189	0.0121572	0.0129043	0.0135612	0.0127513	0.0131269	0.0122578	0.0130719	0.0127026	0.0158333	0.0141905	0.0134118	0.0121465	0.0154396	0.0117764	0.0164758	0.00883585	0.0136523	0.0123667	0.0131329	0.0071977	0.0085796	0.0179547	0.00325733	0.0183564	0.00738319	0.00690803	0.00862069	0.00799508	0.0077748	0.0114441		0.00591716	0.00531915
	0.0149666	0.0177851	0.0129125	0.0135471	0.0112002	0.0126088	0.0133869	0.0147004	0.0121466	0.0128901	0.0134293	0.0126183	0.0130529	0.0122531	0.0129763	0.0126342	0.015586	0.0140845	0.0133929	0.0120289	0.0153322	0.0117036	0.0164619	0.00881758	0.0135659	0.0123457	0.0131048	0.00713719	0.00848896	0.0177966	0.00323625	0.0183272	0.0073369	0.00682471	0.00842697	0.00798164	0.00771456	0.0114304		0.00588235	0.00531915
	0.0149599	0.0177264	0.0128921	0.0134807	0.0111428	0.0125569	0.0133333	0.0146699	0.0121212	0.0128724	0.0134034	0.0125932	0.0129549	0.0122044	0.0129488	0.0126277	0.0154968	0.0140807	0.0133822	0.0119456	0.0152933	0.0116806	0.016406	0.00878378	0.0134953	0.0123457	0.0130501	0.00713012	0.00843882	0.0177948	0.00322581	0.0182464	0.00730936	0.00667727	0.00832625	0.00796261	0.00767342	0.0114019		0.00588235	0.005
	0.0149406	0.0176571	0.0128809	0.013435	0.0109042	0.0125509	0.0133247	0.0146301	0.012085	0.0128185	0.0133758	0.0125	0.0129349	0.0120578	0.012899	0.0126096	0.0154728	0.0140784	0.0133779	0.0119082	0.0152769	0.0116784	0.0163568	0.00878089	0.0134597	0.0123068	0.0129825	0.0070922	0.00841751	0.0176211	0.00321543	0.0182433	0.00728155	0.00666667	0.00831817	0.00787238	0.00765184	0.0113937		0.00588235	0.0049505
	0.0148957	0.017599	0.0128797	0.0133226	0.0108865	0.0125087	0.013308	0.0146	0.0120156	0.0127939	0.0133013	0.0124953	0.0129298	0.0119795	0.0128323	0.0126092	0.0154278	0.0140515	0.0133333	0.0118577	0.0152524	0.0116279	0.0163166	0.00877193	0.0134307	0.0122796	0.0129228	0.00706159	0.00836746	0.0175713	0.00321543	0.0181036	0.00722022	0.00662252	0.00830204	0.00782014	0.00757576	0.0113717		0.00578035	0.00487805
	0.0148819	0.0175411	0.0127226	0.0132704	0.0108369	0.0125	0.0132593	0.0145861	0.0118908	0.0126911	0.0132931	0.0123444	0.0129294	0.0119781	0.0128228	0.0125801	0.0153734	0.0139333	0.0131637	0.0118316	0.0151852	0.0115972	0.0163132	0.00868545	0.0133929	0.0122549	0.0128824	0.00703829	0.00835364	0.0174749	0.00320513	0.0180449	0.00718715	0.0066192	0.00827319	0.00775194	0.00751634	0.0113144		0.00578035	0.00485437
	0.0147643	0.0174477	0.0127119	0.0132639	0.010711	0.0124481	0.0132588	0.0145604	0.0118906	0.0126836	0.013229	0.0123196	0.0128898	0.0119698	0.0128068	0.0125667	0.0153099	0.0136364	0.0128769	0.011828	0.0151738	0.0115813	0.0161106	0.00861009	0.0133678	0.0122531	0.0128205	0.00703273	0.00833965	0.0173443	0.00319489	0.018014	0.00714772	0.00655431	0.00825779	0.00775	0.00751388	0.0112767		0.00578035	0.00478469
	0.0147516	0.0174163	0.0127058	0.0132443	0.0106886	0.0122689	0.0132073	0.0144479	0.0118002	0.0126536	0.0132188	0.0123184	0.0128008	0.0119504	0.0127242	0.0125571	0.0153084	0.0135155	0.0127684	0.0118135	0.0151608	0.0115268	0.0160563	0.00859476	0.0133648	0.0122279	0.0127864	0.00699088	0.00833797	0.0172702	0.00316456	0.0178306	0.00711382	0.00647651	0.00822327	0.00773349	0.00750834	0.0112195		0.00574713	0.0047619
	0.0146255	0.0172633	0.0127015	0.0132389	0.0105795	0.0121951	0.013152	0.0144124	0.0117812	0.0126508	0.0131836	0.0122921	0.0127873	0.0119429	0.0126536	0.0125264	0.0150602	0.0133303	0.0125874	0.0117872	0.0151281	0.0115059	0.0160253	0.00859353	0.0133231	0.0122163	0.0127843	0.00695339	0.00831601	0.017101	0.00315457	0.0177022	0.0071119	0.00647587	0.00822079	0.00773196	0.00747149	0.0111919		0.00574713	0.00473934
	0.0145909	0.0171564	0.0126459	0.0131644	0.0105104	0.0121655	0.0131429	0.0144096	0.0117007	0.0125682	0.0131834	0.0122534	0.0127826	0.0119272	0.0126024	0.0124858	0.0150376	0.0132538	0.0125673	0.0117647	0.0150991	0.0114575	0.0158805	0.00844992	0.0133111	0.0122024	0.0126841	0.00686362	0.00821215	0.0170625	0.0031348	0.0176759	0.0070951	0.00642487	0.00819554	0.0077266	0.00746269	0.0111894		0.00571429	0.00458716
	0.0145038	0.0170934	0.0125084	0.0131579	0.0104224	0.0120699	0.0130822	0.0143101	0.0116997	0.0125168	0.0131796	0.01223	0.0127662	0.0119101	0.0125564	0.0124249	0.0150068	0.013199	0.0125649	0.0117647	0.0150726	0.0114068	0.0158207	0.00840477	0.01329	0.0121688	0.0126454	0.00684151	0.00820232	0.0169614	0.0031348	0.0176352	0.00703883	0.00635526	0.00816882	0.00768913	0.00738552	0.0110799		0.00564972	0.00456621
	0.0144928	0.0170821	0.0124837	0.0131515	0.0103353	0.0119418	0.012963	0.014245	0.0116987	0.0124772	0.0131496	0.0122242	0.012685	0.0118505	0.0124224	0.0123779	0.0149051	0.0130951	0.0125381	0.0117404	0.0150636	0.0111857	0.0157616	0.00829445	0.0132392	0.0121457	0.0126136	0.00683829	0.00819672	0.0169602	0.0031348	0.0175908	0.00701944	0.00635239	0.00811386	0.00765773	0.00738334	0.011069		0.00564972	0.00454545
	0.0144547	0.017037	0.0124783	0.0131432	0.0103056	0.0118821	0.012945	0.0141988	0.0116353	0.012474	0.013088	0.0122176	0.0125649	0.0118227	0.012329	0.0122073	0.0148038	0.0130435	0.0125177	0.0116662	0.0150555	0.0109789	0.015734	0.00828139	0.0132172	0.0121288	0.012594	0.0068345	0.00815976	0.0169531	0.003125	0.0175488	0.00700158	0.00618557	0.00810045	0.00757812	0.00733855	0.0110318		0.00564972	0.00454545
	0.0144479	0.0169873	0.0124386	0.0131255	0.0102575	0.0118367	0.012945	0.0141509	0.0116132	0.0124507	0.0130671	0.0122072	0.0125345	0.0117854	0.0123128	0.0122051	0.0147194	0.0129559	0.0124844	0.0115718	0.0149932	0.0108911	0.0157119	0.00827235	0.0132135	0.0121252	0.0125141	0.00678222	0.00811542	0.0168327	0.003125	0.0174497	0.00698856	0.00618047	0.00803213	0.00747979	0.00725865	0.0109799		0.00558659	0.00452489
	0.0144404	0.0169549	0.0123364	0.0131081	0.0102459	0.0117647	0.012931	0.0141026	0.0115826	0.0124283	0.0130628	0.0121673	0.0125053	0.0117758	0.0121413	0.0121858	0.0147088	0.0129146	0.0123839	0.0115295	0.0149673	0.0108743	0.0156331	0.00825786	0.0130636	0.0120761	0.0124926	0.00677866	0.00810537	0.0166847	0.003125	0.0174419	0.00688299	0.00611132	0.00803213	0.00747384	0.00719881	0.0109439		0.00557103	0.0045045
	0.014383	0.0169305	0.0123198	0.0129715	0.0102281	0.0117647	0.0129001	0.0140582	0.0115578	0.0123762	0.012959	0.0120639	0.012296	0.0117647	0.0121311	0.0120724	0.0146718	0.012884	0.0123055	0.0115136	0.0149543	0.0108522	0.0156235	0.00818666	0.0130354	0.0120248	0.0123665	0.00677048	0.0080429	0.0165499	0.00310559	0.0174064	0.00684932	0.00606441	0.00803052	0.00745474	0.00714678	0.0108949		0.00557103	0.0045045
	0.0143357	0.016914	0.012239	0.0129662	0.0101558	0.0117426	0.0127877	0.0140027	0.0115149	0.0123668	0.0128777	0.0120505	0.0122902	0.0117543	0.0120595	0.0120616	0.0146154	0.0127701	0.0122117	0.0114251	0.0149314	0.0107914	0.0155862	0.00811808	0.0130313	0.0120131	0.0123278	0.00676638	0.00782732	0.0165436	0.00310559	0.0173724	0.00682366	0.0060629	0.00797569	0.00744308	0.00711974	0.0108937		0.00555556	0.0044843
	0.0142802	0.0169119	0.0122233	0.0129493	0.0100932	0.0117055	0.0127841	0.0139731	0.0114683	0.0123471	0.0128524	0.0120482	0.0121655	0.0117427	0.0120163	0.0120595	0.0145946	0.0126582	0.0121807	0.0114017	0.0149173	0.010791	0.0155844	0.00810811	0.0129742	0.0119107	0.0122816	0.00674764	0.00780107	0.0164706	0.00308642	0.0170124	0.00680397	0.00601639	0.00796133	0.007393	0.007109	0.0108736		0.0055325	0.00440529
	0.0141414	0.0169014	0.0121641	0.0129108	0.0100167	0.0115992	0.0127498	0.0139272	0.0114286	0.0123457	0.0128455	0.011879	0.0121625	0.0117335	0.0119731	0.0117853	0.0145745	0.0125571	0.0121466	0.0113245	0.0148787	0.0107527	0.0155502	0.00808675	0.0128814	0.0118367	0.012218	0.0067451	0.00778816	0.0164538	0.00308642	0.016868	0.00679198	0.005997	0.00792668	0.00738007	0.0071048	0.0108471		0.0055325	0.00438596
	0.0139642	0.0168187	0.0121113	0.0128855	0.009996	0.0115662	0.0126582	0.0138812	0.0114121	0.0122587	0.0128039	0.0118707	0.0120897	0.0117288	0.0119397	0.0117435	0.0145662	0.0125115	0.0120732	0.0112877	0.0147976	0.0106383	0.0155039	0.00805649	0.0128647	0.0118297	0.0121885	0.00668747	0.00774593	0.0164336	0.00307692	0.0167105	0.00676413	0.00594442	0.00789177	0.00737463	0.00701262	0.0108108		0.00552486	0.00434783
	0.0139567	0.0167891	0.0120773	0.0128779	0.00992204	0.0115492	0.0126378	0.0138577	0.0114054	0.0122294	0.0127509	0.0118325	0.0120541	0.0117178	0.0118577	0.0117263	0.0145059	0.0123457	0.0120623	0.0112474	0.0147877	0.0106383	0.0153846	0.00798817	0.0126582	0.0118136	0.0121761	0.00662983	0.00773908	0.0163094	0.00307692	0.0165756	0.00674847	0.00594101	0.00788516	0.00731562	0.00698812	0.0107482		0.00550964	0.00429185
	0.0139202	0.0166284	0.0119767	0.012855	0.00990604	0.0115093	0.0126159	0.013785	0.0113895	0.0122179	0.0127255	0.0118194	0.0120536	0.0116898	0.011825	0.0116513	0.0144404	0.0121995	0.0119527	0.0112247	0.0147783	0.0106209	0.0153786	0.00793501	0.0126076	0.0117953	0.012128	0.00661939	0.00771388	0.0162389	0.00307692	0.0165515	0.00671661	0.00593668	0.00786164	0.00727383	0.00697961	0.0107431		0.00549451	0.00429185
	0.0137758	0.0166033	0.0119717	0.0128242	0.0098966	0.0114742	0.012605	0.0137363	0.0113763	0.0122059	0.0126758	0.0117874	0.01205	0.0116751	0.0117647	0.0115955	0.0144144	0.0119048	0.0119481	0.0111786	0.0147653	0.0105948	0.015343	0.00791706	0.012603	0.0117849	0.0121196	0.0066169	0.00769724	0.0161538	0.0030581	0.0165456	0.00667465	0.00589971	0.00779684	0.00726257	0.00693481	0.0107296		0.00549451	0.0042735
	0.0137747	0.0166006	0.0119112	0.0127823	0.0098546	0.0113667	0.0124301	0.01373	0.0113659	0.012145	0.0126608	0.0117532	0.0120482	0.0116732	0.01176	0.0115815	0.0143722	0.0117726	0.0119062	0.0110915	0.0147093	0.0105545	0.0151278	0.00787249	0.0125295	0.0116554	0.0120453	0.0066133	0.00768492	0.0160352	0.00304878	0.0164655	0.00663088	0.00573501	0.00778485	0.00725806	0.00688073	0.0106988		0.00547945	0.00406504
	0.0137741	0.0165922	0.0118937	0.0127755	0.00984144	0.0113636	0.0123873	0.0137088	0.0113618	0.0121395	0.0126515	0.0116951	0.0120482	0.011655	0.0116642	0.011564	0.0143541	0.011708	0.0118323	0.0110872	0.0146362	0.010544	0.0151184	0.0078297	0.0124164	0.0116443	0.0119949	0.00659991	0.00766834	0.0159095	0.00304878	0.0164053	0.00658886	0.00570613	0.00776637	0.0072459	0.00679245	0.0106732		0.00546448	0.00377358
	0.0136823	0.0165816	0.0118912	0.0127622	0.00982403	0.0113603	0.0123622	0.0136253	0.0112153	0.0121333	0.0126432	0.0116822	0.0120089	0.0116429	0.0116499	0.0115445	0.0143396	0.0116833	0.0118186	0.0110773	0.0146001	0.0105263	0.0150639	0.00782	0.0123711	0.0116438	0.0119915	0.0065884	0.00764192	0.0158491	0.00304878	0.0163934	0.00656478	0.00568459	0.00771084	0.00722601	0.00675676	0.0106404		0.00543478	0.00353357
	0.0136491	0.0165691	0.011853	0.0127373	0.00980271	0.011236	0.0123495	0.0134969	0.0112115	0.0121231	0.0126023	0.0116481	0.0120056	0.0116331	0.0116392	0.0115256	0.0143369	0.0116704	0.0118137	0.0110701	0.0145587	0.0105053	0.0150265	0.00781468	0.0123574	0.0115923	0.0119699	0.00651835	0.00761421	0.0157838	0.0030303	0.0163222	0.00649773	0.00568421	0.00770031	0.00722601	0.00673077	0.0106359		0.00543478	0.00350877
	0.0135948	0.0165667	0.0117134	0.0127057	0.00978367	0.011185	0.0122801	0.01348	0.0112041	0.0120938	0.0125455	0.0116279	0.0119473	0.011618	0.0114811	0.0114915	0.0143164	0.0116589	0.0117492	0.0110609	0.0145383	0.01043	0.0150256	0.0078125	0.0123566	0.0115286	0.0119403	0.00651551	0.00757077	0.0156887	0.0030303	0.0163043	0.00646334	0.00562228	0.00764729	0.00721587	0.00668327	0.0105386		0.00534759	0.00348432
	0.0135863	0.0164442	0.011677	0.0127042	0.00977069	0.0110806	0.0122405	0.013447	0.0111819	0.0120919	0.0125447	0.0116079	0.0119075	0.0114854	0.0113951	0.0113809	0.0142433	0.0115919	0.0117407	0.0110101	0.0144928	0.01042	0.0149542	0.00777202	0.0122951	0.0115218	0.0119327	0.00647796	0.0075188	0.0156514	0.00301205	0.0163006	0.00643564	0.00558659	0.00756859	0.00720996	0.00661966	0.0105307		0.00534759
	0.0135135	0.0164412	0.0116675	0.012636	0.00974836	0.0110532	0.012205	0.0134189	0.0111441	0.0120437	0.0124928	0.0115866	0.0118857	0.0114383	0.0113636	0.0113357	0.0142103	0.0115768	0.0116989	0.0109957	0.0144552	0.0103424	0.0148479	0.00773196	0.012279	0.0114449	0.011841	0.00645161	0.0074813	0.0154839	0.00301205	0.0161568	0.00640155	0.00556328	0.00753059	0.00713803	0.00661084	0.0105008		0.00531915
	0.0135135	0.0164079	0.0116257	0.0126116	0.00971043	0.0110484	0.0121845	0.013414	0.011124	0.0119965	0.0124224	0.0115207	0.0118667	0.0114341	0.0113427	0.0113163	0.014174	0.0115216	0.01166	0.0109685	0.0144509	0.0103388	0.0148174	0.00771942	0.0122762	0.0113413	0.0117399	0.00644545	0.00747443	0.015186	0.00301205	0.0161332	0.00638462	0.00555889	0.0075188	0.00713558	0.00660322	0.0104786		0.00529101
	0.0134882	0.0163621	0.0116226	0.0126114	0.00959061	0.0109767	0.0121726	0.0134095	0.0109329	0.0119556	0.0124138	0.0114883	0.011863	0.0114165	0.0112635	0.0112814	0.0140351	0.0115083	0.011659	0.0109268	0.014378	0.0102796	0.0148139	0.00769928	0.0122511	0.0112909	0.0117143	0.00644286	0.00739827	0.0151515	0.003003	0.0161198	0.00633162	0.00555556	0.00749064	0.00708629	0.00658288	0.010453		0.00528169
	0.0134817	0.0163551	0.0115741	0.0126092	0.00958711	0.0108536	0.0120746	0.0133477	0.010928	0.0119544	0.0123651	0.0114716	0.0118343	0.0113996	0.0112094	0.0112644	0.0139776	0.0114829	0.0116451	0.0109252	0.0143059	0.0102748	0.0147914	0.00766137	0.0121951	0.0112686	0.0116086	0.00644202	0.00738636	0.0151286	0.00299401	0.015975	0.00626485	0.00548165	0.00744927	0.00708177	0.00652494	0.0104186		0.0052356
	0.0134457	0.0163032	0.0115713	0.0125497	0.00952835	0.0107527	0.0119966	0.0133278	0.0108108	0.011925	0.0123515	0.0114498	0.0117949	0.0113823	0.0111195	0.0111804	0.0139665	0.0114292	0.0116116	0.0108932	0.0142285	0.0102428	0.0144404	0.00764588	0.012182	0.011236	0.0115586	0.00643317	0.00735502	0.015121	0.00293255	0.0159628	0.00625355	0.00546559	0.00740937	0.00704045	0.00650289	0.0104148		0.0052356
	0.0134334	0.0162866	0.011509	0.012515	0.00940439	0.0107231	0.0119875	0.0132667	0.0108039	0.0118846	0.0123443	0.0114262	0.0117788	0.0113494	0.0111132	0.0111755	0.0139635	0.0114204	0.0115278	0.0108647	0.014218	0.0101859	0.0144206	0.00763213	0.0121184	0.0111581	0.0115016	0.00642808	0.0072314	0.0150884	0.00293255	0.0159592	0.00623281	0.00545171	0.00737602	0.00699677	0.00647948	0.0102847		0.00519481
	0.0134116	0.0161993	0.0114943	0.0125103	0.00940389	0.0107196	0.0119823	0.0132628	0.0107029	0.0118819	0.0123367	0.0114079	0.0117225	0.0113056	0.0111111	0.0111605	0.0138593	0.0113029	0.0114778	0.0107379	0.0142084	0.0101523	0.0144074	0.00759219	0.0120111	0.011079	0.0114943	0.00639269	0.00722892	0.0149866	0.00292398	0.0159516	0.00622896	0.0054413	0.00727651	0.00699437	0.00644567	0.0101347		0.00518135
	0.0133864	0.0161717	0.0114339	0.0125094	0.00936664	0.0106693	0.0119749	0.0131941	0.0106579	0.0118636	0.0123153	0.0113977	0.0116595	0.0112567	0.0111012	0.0111518	0.0137858	0.0112835	0.011319	0.0106447	0.0142045	0.0101099	0.0143722	0.00756742	0.0119816	0.0110599	0.0113982	0.0063685	0.00719823	0.0149254	0.00291545	0.0158408	0.00622825	0.00543478	0.00727476	0.00697589	0.00644444	0.0100654		0.00515907
	0.0133156	0.0161234	0.0114105	0.0125	0.00934579	0.0106383	0.011957	0.013153	0.0106505	0.0118449	0.0122511	0.0113919	0.0115936	0.0111793	0.0110051	0.0111219	0.0137564	0.011168	0.0112457	0.0106007	0.0141844	0.0100998	0.0143699	0.0075594	0.0119702	0.0110497	0.0112676	0.00636436	0.00711939	0.0147663	0.00290698	0.0157787	0.00616165	0.00539407	0.00720417	0.00697007	0.00643501	0.0100328		0.00512821
	0.0131911	0.0160827	0.0113973	0.0124652	0.00933707	0.0106082	0.0119433	0.0131413	0.010582	0.0118031	0.0122295	0.0113294	0.0115924	0.0111456	0.0109769	0.0111037	0.0137184	0.0111607	0.0112291	0.0106003	0.0141546	0.0100723	0.0143271	0.00754976	0.0118534	0.0110034	0.0110834	0.00632911	0.00703844	0.0147312	0.00289855	0.015748	0.00613041	0.00531095	0.00719856	0.00695847	0.00641849	0.00993377		0.00510204
	0.0131906	0.0160623	0.0113867	0.0124469	0.0093177	0.0105597	0.0119346	0.0131016	0.0105484	0.0117773	0.0122228	0.0112911	0.0115891	0.0110267	0.0109081	0.0110906	0.0137157	0.0110935	0.0112137	0.0105649	0.014114	0.0100713	0.0142691	0.00754717	0.0118367	0.010989	0.0110115	0.00631912	0.0070373	0.014652	0.00289017	0.0156463	0.00612453	0.00530955	0.00716667	0.00693937	0.00640155	0.00990099		0.00508906
	0.0130342	0.0159465	0.0113852	0.0124018	0.00931733	0.0104879	0.0118718	0.0129776	0.0105263	0.0117628	0.012212	0.0112045	0.0115552	0.0109961	0.0109078	0.0110906	0.0135501	0.0110608	0.0110925	0.0105167	0.0140162	0.0100386	0.0142484	0.00752089	0.0118343	0.0109857	0.0110046	0.00631748	0.00702189	0.0146232	0.00289017	0.0155266	0.00608389	0.00530504	0.00715631	0.00688073	0.00639439	0.00990099		0.00507614
	0.012987	0.0159314	0.0113826	0.0122877	0.009299	0.0104233	0.0118291	0.0128378	0.0104851	0.0117548	0.012206	0.0111625	0.0115191	0.0109932	0.0108399	0.0110497	0.0135364	0.011039	0.0110885	0.0105037	0.0140023	0.00996194	0.0142373	0.0075188	0.0117837	0.0109769	0.010989	0.00627376	0.00701262	0.0145867	0.00289017	0.0154919	0.00606411	0.00527395	0.00711269	0.00687285	0.00638492	0.00987944		0.00502513
	0.0129817	0.0159291	0.0113514	0.0122722	0.00929204	0.0104167	0.0117862	0.0128321	0.0104748	0.0117228	0.0122007	0.0111239	0.0113798	0.0109912	0.0108265	0.0110216	0.0134181	0.0110024	0.0110076	0.0104302	0.0139206	0.00994848	0.014218	0.00746888	0.0117647	0.0109566	0.0109819	0.00626959	0.00700525	0.0145297	0.00288184	0.0153527	0.00605327	0.00526008	0.0071048	0.00682558	0.00637291	0.00982486		0.00497512
	0.0129151	0.0158671	0.0113424	0.0121821	0.00929023	0.0104167	0.0117783	0.0128258	0.0104304	0.0117136	0.0122	0.0111111	0.0113445	0.0109908	0.0105531	0.010989	0.0133843	0.0108067	0.0108004	0.0103249	0.0138889	0.00993377	0.0141687	0.00745306	0.0117647	0.0108394	0.0108962	0.00625978	0.00698812	0.0144357	0.00288184	0.0153392	0.00602151	0.00521245	0.00710339	0.00679902	0.00631712	0.00982091		0.00496524
	0.0128971	0.0158513	0.0112896	0.0120882	0.00928938	0.0104083	0.0117521	0.0127373	0.0104167	0.0116871	0.0121854	0.011101	0.0112863	0.0109507	0.0105091	0.0109625	0.0133657	0.0106775	0.0107872	0.0103249	0.0137518	0.0099143	0.014168	0.00737619	0.0117225	0.0108214	0.0108225	0.00623539	0.00697906	0.0144169	0.00287356	0.015309	0.00601956	0.00519603	0.0070373	0.00677392	0.00625978	0.00978399		0.0049505
	0.0128873	0.0158363	0.0112729	0.0119092	0.00925367	0.0103498	0.0117486	0.0127329	0.0103767	0.0116755	0.0121578	0.0110747	0.011258	0.0109463	0.010491	0.0109182	0.0133407	0.0106089	0.0107844	0.0102443	0.0136961	0.00987827	0.0141211	0.0073576	0.0117151	0.0107817	0.0107583	0.00615797	0.00697674	0.0143168	0.00286533	0.0151812	0.0059744	0.00519481	0.00701951	0.00671141	0.00625	0.00976909		0.0049505
	0.0128503	0.0158184	0.011262	0.0118498	0.00925133	0.0103292	0.0117371	0.0126582	0.0103236	0.011642	0.0120243	0.0110132	0.0112113	0.0109303	0.0104849	0.010878	0.0133053	0.0105664	0.0106572	0.0101805	0.0136479	0.00984164	0.0141016	0.00733272	0.0117039	0.0107812	0.0107527	0.0060698	0.00697579	0.0143027	0.00286533	0.0150081	0.00596095	0.00518135	0.00701382	0.00668968	0.00624566	0.00975836		0.0049505
	0.0128434	0.0157385	0.0112603	0.0118157	0.00923695	0.0103257	0.0116464	0.01265	0.0103207	0.0116383	0.0119253	0.0109883	0.0111953	0.0108804	0.0104313	0.0108567	0.0132548	0.0105634	0.0106025	0.0101613	0.0136219	0.00980392	0.0140892	0.00732238	0.0116097	0.0107806	0.0106979	0.00603795	0.00697051	0.014299	0.002849	0.0148024	0.00594228	0.00514194	0.00693241	0.00661853	0.00623564	0.00974109		0.0049505
	0.0128305	0.0157292	0.0112498	0.0117834	0.00921105	0.0102627	0.0116204	0.012605	0.0103203	0.011597	0.011925	0.0109675	0.0111209	0.0108774	0.0103093	0.0108511	0.0132432	0.0105456	0.0105939	0.010157	0.0136054	0.00977492	0.0140442	0.00730994	0.0116031	0.0107784	0.0106965	0.00602151	0.00696436	0.0142698	0.002849	0.0147933	0.00594089	0.00509221	0.00693132	0.00661813	0.0062094	0.00966944		0.00492611
	0.0128241	0.0156564	0.0112242	0.0117647	0.00919973	0.0102143	0.0115274	0.0125659	0.0102472	0.0115527	0.0118475	0.0109036	0.0110503	0.0108499	0.0102389	0.0108033	0.0131965	0.0104983	0.0105828	0.010155	0.0136021	0.00970189	0.0140095	0.00729572	0.0115894	0.0107311	0.0106738	0.00601966	0.00693642	0.0142566	0.00284091	0.0147783	0.00587828	0.00508035	0.00688389	0.00660939	0.00618557	0.00966651		0.00487805
	0.0128233	0.0155303	0.0111971	0.0117302	0.00917901	0.0101112	0.0114943	0.0125218	0.0102327	0.0115414	0.0118219	0.0108649	0.0110378	0.0108368	0.010131	0.0107661	0.0131183	0.0104608	0.0105098	0.0101366	0.0135882	0.00969915	0.0140041	0.00725689	0.0115783	0.0107275	0.0106383	0.00599671	0.00688559	0.014229	0.00284091	0.0145955	0.00587682	0.00502793	0.00685504	0.00659691	0.00618047	0.00966303		0.00485437
	0.0128205	0.0154799	0.0111497	0.0116968	0.00915681	0.010101	0.011482	0.0124688	0.0101287	0.0114806	0.0117329	0.0108181	0.0110266	0.0108135	0.0101225	0.0107527	0.0130506	0.0104566	0.0104273	0.0101278	0.0135754	0.00968048	0.0139558	0.00718735	0.0115607	0.0107239	0.010627	0.00597184	0.00685208	0.0142287	0.00284091	0.0144651	0.00586265	0.00502513	0.00684932	0.00658275	0.00616469	0.00964967		0.00478469
	0.0128205	0.0154788	0.0111212	0.0116667	0.00914566	0.010101	0.0114286	0.0124195	0.0101136	0.0114546	0.0117279	0.0107858	0.0109942	0.010763	0.0101001	0.0107468	0.0130031	0.0103896	0.0103928	0.0100474	0.0135428	0.00964852	0.0139535	0.00709459	0.0115217	0.0107103	0.0106101	0.00596172	0.00683177	0.014068	0.00284091	0.0144509	0.00584498	0.00502513	0.00682303	0.00656628	0.00615806	0.0096332		0.0047619
	0.0127831	0.0154775	0.0111165	0.0116253	0.00913995	0.010101	0.0114174	0.0124089	0.0100842	0.0114395	0.0117103	0.0107858	0.0109863	0.0107284	0.0100987	0.010741	0.0129573	0.0103607	0.0103374	0.0100094	0.013535	0.00962224	0.0139468	0.0070922	0.0114117	0.0105857	0.0106042	0.00594972	0.00680561	0.0139522	0.00282486	0.0143854	0.00583745	0.00502513	0.00682057	0.00655566	0.00614035	0.00959174		0.00475737
	0.0127371	0.0153568	0.0110657	0.0116035	0.00903525	0.010101	0.0113974	0.0124057	0.0100548	0.0114336	0.0116954	0.0107606	0.0109439	0.0106545	0.0100836	0.0106857	0.0128957	0.0103419	0.0103358	0.0100014	0.0135166	0.00959538	0.0139366	0.0070922	0.0113636	0.0105775	0.0105769	0.00593863	0.00680272	0.0139134	0.00282486	0.0143737	0.00580271	0.00501028	0.00676205	0.0065086	0.00608211	0.00959024		0.00469484
	0.0127315	0.0153061	0.0110229	0.0115286	0.00896906	0.0100729	0.0113834	0.0123839	0.0100118	0.0114251	0.0116644	0.0107426	0.0108924	0.0106383	0.0100643	0.0106854	0.0128817	0.010323	0.0103278	0.00998139	0.0135099	0.0095868	0.0138889	0.00704451	0.0113556	0.010574	0.0105309	0.00592467	0.00680272	0.0138889	0.0027972	0.0141203	0.00577876	0.005	0.00673595	0.00647948	0.00607567	0.00958389		0.00469484
	0.0126191	0.0152402	0.0109915	0.0115253	0.00890782	0.0100478	0.0113674	0.0123771	0.0099655	0.011418	0.0115324	0.010696	0.0107143	0.0105857	0.010059	0.0106343	0.0128661	0.0102979	0.0103015	0.00992847	0.0133615	0.00957378	0.0138255	0.00703235	0.011329	0.0105634	0.0104811	0.00591447	0.00678733	0.0138122	0.00278552	0.0140949	0.00577731	0.00499191	0.0066762	0.00641383	0.00607315	0.00956429		0.00469043
	0.0125844	0.0152292	0.0109847	0.0114548	0.00885916	0.00997506	0.0113568	0.0123586	0.00995025	0.0113712	0.0114638	0.0106717	0.0106903	0.0105592	0.0100448	0.0105735	0.0127782	0.0102489	0.0102837	0.00991713	0.013346	0.00951557	0.0137436	0.00701872	0.011304	0.0105412	0.0104285	0.00588716	0.00678733	0.0137744	0.00278552	0.0140465	0.00576246	0.00496894	0.00664336	0.00640424	0.00605908	0.00955328		0.0046729
	0.0125683	0.01521	0.0109698	0.011441	0.00883576	0.00990991	0.0112936	0.0122877	0.00993049	0.01132	0.0114343	0.0106157	0.0105927	0.0105263	0.0100334	0.0105291	0.0127077	0.0102469	0.0102411	0.00987654	0.0133176	0.00950226	0.0137405	0.0069978	0.0113013	0.0105263	0.0104136	0.005884	0.00677549	0.0136842	0.00276243	0.0140327	0.00574863	0.00490276	0.00662252	0.00634543	0.00605061	0.00953678		0.00465839
	0.0124202	0.0151866	0.0109589	0.0113906	0.00882695	0.00988363	0.0112546	0.0122596	0.00991679	0.0113	0.0113391	0.0105995	0.010587	0.0105209	0.0100271	0.0104912	0.0126761	0.0102308	0.0100736	0.00979887	0.0133129	0.00945626	0.0137197	0.0069864	0.0112412	0.0105147	0.0103868	0.00588235	0.00674536	0.0136382	0.00275103	0.014026	0.00570835	0.00490082	0.00661339	0.00632911	0.00601052	0.00952509		0.00460829
	0.0122858	0.0151708	0.0109395	0.0113333	0.00881182	0.00987965	0.0112108	0.0122364	0.00991156	0.0112965	0.0113019	0.010589	0.0105856	0.0104853	0.00990099	0.0104819	0.0126529	0.010157	0.010071	0.00977761	0.0133099	0.00942396	0.0137158	0.00696864	0.0111174	0.0105018	0.0103657	0.00587571	0.00672948	0.0135287	0.00274348	0.0139649	0.00567761	0.00487937	0.00661157	0.00630252	0.00595533	0.00946266		0.00458716
	0.012176	0.0151515	0.0109356	0.0113331	0.00880432	0.00987803	0.0112073	0.0122192	0.00991025	0.0112809	0.0112518	0.0105369	0.010547	0.0103817	0.00988593	0.0104712	0.0126096	0.0101144	0.0100556	0.00975177	0.0133086	0.00938233	0.0135876	0.00688995	0.0111111	0.0104587	0.0102993	0.00586396	0.00672834	0.0133503	0.0027248	0.0138568	0.00558771	0.00485838	0.00658177	0.006247	0.00594796	0.00943849		0.00456621
	0.0121725	0.0151344	0.010929	0.0113228	0.00879472	0.00984926	0.0111977	0.0121951	0.00988533	0.0112278	0.011196	0.0104948	0.0105361	0.0103604	0.00987507	0.0104613	0.0125156	0.0099699	0.0100338	0.00974184	0.0132523	0.00933211	0.0134466	0.00687023	0.0110994	0.0103627	0.0102845	0.00583431	0.00668896	0.0133452	0.00269542	0.0137806	0.00556793	0.00484543	0.00656516	0.00612602	0.00593723	0.00939306		0.00456621
	0.0121177	0.0151316	0.0109232	0.0112886	0.00878132	0.00982845	0.0111732	0.0121852	0.00985875	0.0111932	0.0111814	0.0104726	0.0105184	0.0102946	0.00983822	0.0103848	0.0125	0.00991853	0.0100071	0.00973574	0.0132281	0.00928984	0.0132701	0.00684932	0.011065	0.0103514	0.0102237	0.00582524	0.00665054	0.0131119	0.00269542	0.0135714	0.00553403	0.00481575	0.00652432	0.0061082	0.00592593	0.00939217		0.00452489
	0.0121163	0.0150862	0.0108992	0.0111495	0.00877118	0.00980392	0.011162	0.0121459	0.00976378	0.0111914	0.011102	0.0104122	0.0104936	0.0102779	0.00980244	0.0103466	0.0124888	0.00988794	0.0100067	0.00972081	0.0132075	0.00927555	0.013222	0.00683594	0.0110597	0.0103484	0.0102215	0.00578592	0.00663717	0.0131062	0.00269542	0.0135135	0.00549625	0.00479661	0.00648882	0.00607087	0.00590909	0.00938338		0.0044843
	0.0120729	0.0150754	0.0108888	0.0111152	0.00873362	0.00977523	0.0111562	0.0121381	0.00970666	0.0111384	0.0110935	0.0104076	0.0104745	0.0102169	0.00979592	0.0102461	0.0124811	0.00988085	0.00986799	0.00970874	0.0131827	0.00926999	0.0131904	0.00681354	0.0110384	0.0103292	0.0102148	0.00578487	0.00660955	0.0131058	0.00268817	0.0134157	0.0054609	0.00478215	0.00647916	0.00602623	0.00590488	0.00935891		0.00446429
	0.0120388	0.0150663	0.010875	0.0110941	0.0086742	0.00975434	0.0111552	0.0121212	0.00969053	0.011096	0.0110299	0.0103448	0.0104598	0.0101042	0.00977444	0.0101908	0.0124717	0.00981959	0.00968784	0.00966443	0.0131403	0.00919719	0.0131805	0.0067937	0.0110017	0.0102953	0.0102136	0.00575595	0.00655542	0.0130599	0.0026738	0.0132805	0.00544009	0.004773	0.00643238	0.00601779	0.00589971	0.00934579		0.00444444
	0.0120257	0.0150101	0.0108591	0.0110894	0.00863132	0.00974026	0.0111372	0.0121186	0.00966374	0.0110252	0.0109967	0.0103359	0.0104469	0.010104	0.00975976	0.0101769	0.0124138	0.00981873	0.00968436	0.00965534	0.0131238	0.00915751	0.0131507	0.00679084	0.0109969	0.0102681	0.0101852	0.00573009	0.00650759	0.0130249	0.00266667	0.0132773	0.00541738	0.00471045	0.00640912	0.005998	0.0058319	0.00930961		0.00444444
	0.012012	0.0149547	0.0107527	0.0110354	0.00861628	0.00963476	0.0110963	0.0121107	0.00961538	0.010968	0.010872	0.0102916	0.0104076	0.0100825	0.0097029	0.0101758	0.0123511	0.00978179	0.00965772	0.00960699	0.0130597	0.00914179	0.0131136	0.00676903	0.010989	0.0102643	0.0100769	0.005692	0.00640439	0.0130024	0.00265252	0.0132533	0.005397	0.00469897	0.00637959	0.00592768	0.00580799	0.00925257		0.00442478
	0.012	0.0148445	0.0107519	0.0110317	0.00861196	0.00963146	0.0110842	0.0120903	0.00960549	0.0109637	0.0108548	0.0102744	0.0104031	0.0100707	0.0096963	0.0101472	0.0123364	0.00976324	0.00965739	0.00947412	0.0129464	0.00884564	0.0130727	0.00674721	0.0109649	0.0102489	0.0100444	0.00567227	0.00638686	0.0129693	0.0026455	0.0131747	0.00538677	0.00468241	0.00635544	0.00592034	0.00580672	0.0092474		0.00442478
	0.0119874	0.0148431	0.0107502	0.0109586	0.00855676	0.00961538	0.0110455	0.0119387	0.00955888	0.0109602	0.010703	0.0102586	0.010333	0.01	0.00966042	0.0100773	0.0123239	0.00971398	0.00963546	0.00943745	0.0129432	0.00883652	0.0130695	0.00671429	0.0109477	0.0102466	0.0100324	0.0056701	0.00638104	0.0129558	0.0026455	0.0131579	0.00536993	0.0046729	0.00633771	0.0059105	0.00578778	0.00921513		0.00442478
	0.011987	0.0148096	0.0107183	0.0108838	0.00855449	0.0096005	0.011041	0.0118577	0.00952381	0.0109546	0.0106114	0.0100789	0.0102881	0.00998801	0.00964932	0.0100741	0.0123077	0.00971318	0.00962367	0.00937082	0.0128066	0.00872516	0.0130538	0.00671141	0.0109363	0.0102249	0.00999167	0.00566893	0.00637394	0.0128963	0.00263852	0.0131201	0.0053612	0.00466451	0.00628717	0.00590446	0.00573888	0.00920368		0.00440529
	0.0119856	0.0147934	0.0107172	0.0108618	0.00847458	0.00955525	0.0109991	0.0118294	0.00948574	0.010926	0.0105963	0.0100503	0.0101731	0.00994213	0.00963956	0.0100548	0.0122768	0.00967246	0.00960572	0.00935757	0.0127768	0.00869565	0.0130189	0.00668896	0.010872	0.0102107	0.00994329	0.00566765	0.00632578	0.0128949	0.00263852	0.0131165	0.00534647	0.00465513	0.00626414	0.00586205	0.00573653	0.00918047		0.0043573
	0.0119148	0.0146935	0.0107034	0.0108192	0.00845865	0.00954887	0.0109971	0.0117847	0.00946932	0.0108895	0.0105701	0.0100503	0.0101574	0.0099167	0.00963197	0.0100464	0.0122664	0.00964217	0.00958466	0.00935326	0.0127555	0.00863382	0.0130152	0.00667111	0.0108374	0.0101609	0.00994109	0.00566572	0.00629723	0.0128576	0.00263158	0.0130956	0.00532678	0.00465116	0.00624665	0.00585309	0.00572519	0.00916406		0.00434783
	0.0118817	0.0146713	0.0106707	0.0107964	0.00845335	0.00953079	0.010989	0.0117188	0.00944163	0.0108136	0.0105579	0.00998977	0.0101511	0.00988875	0.00958651	0.0100042	0.012261	0.00963801	0.00958466	0.00932576	0.0127156	0.0085922	0.0129844	0.00663398	0.0107692	0.0100727	0.00989933	0.00561798	0.00625	0.0128224	0.00263158	0.0130669	0.00532559	0.00464499	0.0061712	0.00582751	0.00571621	0.00914149		0.00434783
	0.0118483	0.0146628	0.0106586	0.0107754	0.00843994	0.00949474	0.0109859	0.0117146	0.00941242	0.0107921	0.010553	0.00998477	0.0101309	0.00987399	0.00956429	0.010004	0.0122609	0.00959379	0.0095498	0.00930233	0.0126987	0.0085753	0.0129603	0.00661626	0.0107025	0.0100727	0.00988504	0.00561325	0.00624291	0.0128205	0.00262467	0.0130593	0.00532257	0.0046322	0.0061665	0.00580645	0.00571152	0.00910668		0.00434783
	0.0118252	0.0145749	0.0106259	0.0107374	0.00843944	0.00947551	0.010951	0.0116751	0.00940987	0.010767	0.0105243	0.00994908	0.0100756	0.00984494	0.00945926	0.00994431	0.0122324	0.00957813	0.00948003	0.00928249	0.0126689	0.00854701	0.0129329	0.00661502	0.0107007	0.010008	0.00986796	0.00559567	0.00623269	0.012806	0.00262467	0.0130558	0.00529634	0.00462588	0.00614948	0.00573913	0.00569953	0.00908632		0.00429185
	0.0118198	0.0144491	0.0105887	0.0107228	0.00843091	0.00944523	0.0109321	0.0116492	0.00934579	0.0106958	0.010518	0.00993219	0.010054	0.00982801	0.00945391	0.00993049	0.0121812	0.00957755	0.00946722	0.0092803	0.0126634	0.00853018	0.0128866	0.00660429	0.010582	0.010002	0.00983691	0.00559552	0.00622568	0.0127984	0.00262467	0.013013	0.00529213	0.004623	0.00614894	0.00571268	0.00568747	0.00907975		0.0042735
	0.0118054	0.0144274	0.0105694	0.0106673	0.00841515	0.00944032	0.0109158	0.0116354	0.00932698	0.0105708	0.0105152	0.00992695	0.0100456	0.00964727	0.00941307	0.00990099	0.0120805	0.00957702	0.00938967	0.00914761	0.0126582	0.00852234	0.0128739	0.00659513	0.0105725	0.0099631	0.00983607	0.00559062	0.00621118	0.0127741	0.00261097	0.013009	0.00526514	0.00455581	0.00614439	0.00570704	0.0056391	0.0090605		0.0042735
	0.0117994	0.0144002	0.0105581	0.0106516	0.00838457	0.00942992	0.0108988	0.0115874	0.00930195	0.01052	0.0104923	0.00991702	0.00999584	0.00960502	0.00939778	0.00987193	0.0120482	0.00951928	0.00932203	0.00913649	0.0126582	0.00846052	0.0128443	0.00657733	0.0105597	0.00994475	0.00970392	0.00558269	0.00616016	0.0126955	0.00261097	0.0129944	0.00525486	0.00452315	0.00611621	0.00569228	0.00561995	0.00901615		0.00425532
	0.0117832	0.0143905	0.010553	0.0106007	0.00837783	0.009377	0.0108678	0.0115451	0.00921181	0.0104376	0.0104762	0.00989079	0.00998697	0.0096024	0.00936265	0.00980243	0.0120253	0.00949993	0.00926276	0.00911458	0.0126582	0.0084443	0.0127883	0.00651163	0.0104979	0.00994227	0.00963135	0.00555982	0.00612495	0.0126422	0.00260417	0.012987	0.00523854	0.00451495	0.00607903	0.00568759	0.00557769	0.00894715		0.00424628
	0.0117813	0.0143899	0.0105033	0.0105983	0.00830225	0.00934314	0.0108192	0.011526	0.00916749	0.0104204	0.0104394	0.00988924	0.0099734	0.00959117	0.00934944	0.00970644	0.0119904	0.00945484	0.00922722	0.00909288	0.0126386	0.00842401	0.0127836	0.00650888	0.0104904	0.00992235	0.0095565	0.00553176	0.00611621	0.0126409	0.00260417	0.0129771	0.0052356	0.00451097	0.00606298	0.00567491	0.00557103	0.0089442		0.00423729
	0.011734	0.0143659	0.0104126	0.0105698	0.00828586	0.00933442	0.0108187	0.0114943	0.00913665	0.0104068	0.0104348	0.0098562	0.00992745	0.00958801	0.00930306	0.00968523	0.0119742	0.0094205	0.00918241	0.00900901	0.0126289	0.00842266	0.0127524	0.00650759	0.0104086	0.00986359	0.00953159	0.00551268	0.00611621	0.0126002	0.00260417	0.0129357	0.00518284	0.00443459	0.00603622	0.00567311	0.00554529	0.00890869		0.00423729
	0.0116877	0.0143345	0.0104014	0.0105495	0.00823938	0.0093037	0.0108168	0.0114943	0.00913578	0.0103976	0.0104032	0.00981873	0.00991622	0.00957746	0.00929692	0.0096507	0.0119572	0.00940087	0.00917431	0.00895579	0.0125777	0.00839658	0.0127512	0.00644298	0.0103791	0.00986193	0.00948925	0.00550775	0.00610403	0.0125467	0.0025974	0.0128659	0.00516796	0.00443262	0.00602883	0.00562852	0.00554324	0.00890404		0.00421941
	0.0116499	0.014312	0.0103661	0.0104912	0.00821018	0.00927948	0.010768	0.0114483	0.00913546	0.0103671	0.0103538	0.00973097	0.00989699	0.00956755	0.00927467	0.00961183	0.0119556	0.00937951	0.00917431	0.00890393	0.0125696	0.00838674	0.0126404	0.00642722	0.010293	0.00982686	0.00942712	0.00550178	0.00607639	0.0125397	0.0025974	0.0128391	0.00515863	0.00437238	0.0060053	0.00562149	0.00548101	0.00882772		0.00421941
	0.0115502	0.0142913	0.010293	0.0104463	0.0082085	0.00925926	0.0106925	0.0114416	0.00911913	0.0102941	0.0103451	0.00971524	0.00988501	0.00956416	0.00926586	0.00956175	0.0119122	0.00937571	0.00912365	0.00888407	0.0125601	0.00833279	0.0126138	0.00642279	0.0102062	0.00978179	0.00941282	0.00549882	0.00603265	0.0123839	0.0025974	0.0128384	0.00513824	0.00434837	0.00600528	0.00561871	0.00542986	0.00882437		0.00421941
	0.0115338	0.014288	0.0102925	0.0104261	0.00819234	0.00923885	0.0106875	0.0114081	0.00910091	0.0102539	0.0103235	0.00970373	0.0098107	0.00953419	0.00921053	0.0095339	0.0118878	0.00934723	0.00908728	0.00887062	0.0125338	0.0083271	0.0125749	0.00639883	0.0101695	0.00974158	0.00934412	0.00549102	0.00603136	0.0123508	0.00258398	0.0127518	0.00513799	0.00434492	0.00598905	0.00558659	0.00541619	0.00880445		0.0042061
	0.0115325	0.0142579	0.0102759	0.010395	0.00819142	0.00923077	0.0106724	0.0113723	0.0091005	0.010227	0.0102757	0.00968477	0.00975101	0.0095064	0.00920685	0.00953064	0.0118748	0.00925241	0.00907571	0.0088685	0.0125096	0.00831086	0.0125712	0.00639659	0.0101498	0.00972842	0.00931918	0.00549057	0.00599829	0.0123382	0.00257732	0.0127306	0.00511945	0.00433651	0.00597392	0.005572	0.00538424	0.00878709		0.00414938
	0.0115108	0.0142394	0.0102726	0.0103683	0.00818474	0.00919118	0.0106207	0.0113208	0.00908008	0.0102041	0.0102443	0.00962886	0.00975004	0.00950533	0.00919405	0.00950119	0.0118616	0.00914948	0.00906344	0.00884956	0.0124926	0.00830988	0.0125612	0.00637845	0.0101399	0.00971513	0.00927536	0.00548215	0.00599216	0.0123298	0.00257732	0.0127119	0.00510814	0.00430313	0.00595829	0.00554622	0.00536381	0.0087803		0.00413223
	0.011505	0.0141697	0.0102241	0.0103513	0.00811746	0.00918728	0.0106038	0.0113208	0.00905131	0.0102041	0.010228	0.00958557	0.0097386	0.00949332	0.009158	0.00948905	0.0118384	0.00913838	0.00903661	0.0088224	0.0124397	0.00825663	0.0125127	0.00637755	0.010133	0.00971482	0.0092445	0.00547758	0.00598802	0.0123199	0.00257069	0.0125712	0.00510796	0.0043021	0.00594746	0.00554243	0.00534283	0.0087757		0.00413223
	0.0114688	0.014137	0.0101961	0.0103354	0.00803839	0.00917653	0.0105955	0.0112892	0.00903666	0.0101204	0.0101957	0.00953429	0.00970874	0.00948767	0.00910966	0.00948401	0.0118243	0.0090535	0.00898087	0.00881995	0.0124207	0.0082231	0.0125108	0.00636822	0.0100756	0.00971429	0.00923607	0.00547074	0.00597015	0.0122578	0.0025641	0.0125654	0.00503898	0.00430084	0.005923	0.00549683	0.00534267	0.00877507		0.00413223
	0.0114605	0.0141363	0.010128	0.0103114	0.00803674	0.00906245	0.0105943	0.0112774	0.0090265	0.0100822	0.0101928	0.00949094	0.00959838	0.00947672	0.0091047	0.00947867	0.0118086	0.00898646	0.00897202	0.00880221	0.0124069	0.00818926	0.0125023	0.00635158	0.0100105	0.00965536	0.00921226	0.00546728	0.00595948	0.0122342	0.0025641	0.0125209	0.00503778	0.0042676	0.00592141	0.0054421	0.0053178	0.00876897		0.00411523
	0.0114416	0.0141353	0.0101138	0.0102891	0.00798176	0.00905361	0.010568	0.0112662	0.00885424	0.0100451	0.0101365	0.00942911	0.00959442	0.00944465	0.00908871	0.00946453	0.0118052	0.00895724	0.00895739	0.00879443	0.0123409	0.00818296	0.0124555	0.00634669	0.00999535	0.0096238	0.00918686	0.00546635	0.00595829	0.012229	0.0025641	0.0125	0.00503525	0.00426712	0.00590307	0.00544047	0.00524934	0.00873524		0.00411523
	0.0113293	0.0141077	0.0100662	0.0101798	0.007972	0.00905141	0.0105547	0.0111904	0.00884376	0.0100442	0.0101285	0.00940171	0.00959325	0.00943271	0.00903091	0.00942844	0.0117647	0.00883392	0.00892731	0.0087267	0.0123303	0.00814592	0.0123587	0.00632296	0.00998697	0.00962339	0.00918635	0.00544824	0.00590372	0.0122147	0.00255102	0.0124744	0.00501834	0.00425739	0.00589035	0.00527183	0.00520551	0.00869133		0.00409836
	0.0113154	0.0140707	0.0100478	0.0101101	0.00796767	0.00904662	0.0103776	0.0111252	0.00881335	0.010039	0.0101135	0.00938695	0.00959325	0.00940726	0.00902151	0.00941781	0.011738	0.00882978	0.00887346	0.00872623	0.0123226	0.00811908	0.0122655	0.00630583	0.00995025	0.00959821	0.00916944	0.00544718	0.00585938	0.0121246	0.00255102	0.0123935	0.00498728	0.00422705	0.00588124	0.00519931	0.00517632	0.00866142		0.00409836
	0.0112903	0.0140256	0.0100433	0.0100897	0.00796447	0.00904523	0.0103717	0.0110852	0.00881057	0.0100334	0.0101119	0.009299	0.0095732	0.00934244	0.00901725	0.009379	0.011713	0.00881295	0.00886474	0.00872191	0.0122545	0.00808038	0.0122368	0.00628299	0.00989487	0.00951336	0.00913186	0.00543041	0.00584532	0.0121058	0.00255102	0.0122761	0.00489827	0.0042215	0.00587495	0.00519734	0.00515464	0.0086489		0.00406504
	0.011279	0.0140161	0.010039	0.0100819	0.00795229	0.00900721	0.0103213	0.0110259	0.00879121	0.010022	0.0100347	0.00921027	0.00951939	0.00932449	0.00900901	0.00935279	0.0117096	0.00881057	0.00884002	0.00865551	0.0122387	0.00806452	0.011976	0.00625782	0.00986436	0.00946396	0.00910433	0.00541516	0.00584155	0.0120614	0.00253807	0.0122321	0.00489733	0.00418221	0.00586265	0.00515324	0.00514328	0.00859845		0.00401606
	0.0112349	0.014014	0.0100279	0.010076	0.00791557	0.00896672	0.0102909	0.010989	0.00876461	0.0100194	0.0100056	0.00920737	0.00951912	0.00930321	0.00900901	0.00928314	0.0116618	0.00876424	0.00880536	0.00864603	0.0122355	0.00802593	0.0119581	0.0062383	0.00982533	0.00943644	0.00903161	0.00539374	0.00583333	0.0120575	0.00253807	0.0121244	0.00487201	0.00415251	0.00585212	0.00510949	0.00514311	0.0085857		0.00400802
	0.0111695	0.014002	0.0100156	0.0100613	0.00788695	0.00893846	0.0102359	0.0109817	0.00875625	0.010003	0.00994419	0.00918671	0.00949313	0.00929531	0.00897496	0.00925926	0.0116598	0.00872242	0.00879555	0.00861943	0.0122237	0.00800582	0.0119173	0.00623701	0.00978424	0.00940147	0.00901756	0.00537886	0.00582902	0.0119048	0.00253165	0.0121179	0.00483189	0.00414913	0.0058464	0.00510031	0.00513631	0.00855172		0.004
	0.0111509	0.0139954	0.00999592	0.0100535	0.00786473	0.00893563	0.0101767	0.0109235	0.00875303	0.00996951	0.00994224	0.00918216	0.00949081	0.00929457	0.00897134	0.00925926	0.0116521	0.00869565	0.00877716	0.00860969	0.0122066	0.00798258	0.011892	0.00622352	0.00974125	0.00935608	0.00898876	0.00537007	0.00580153	0.0119011	0.00253165	0.0120617	0.00481255	0.00413712	0.00581395	0.00509814	0.00512821	0.00852303		0.00398406
	0.0111231	0.0139755	0.00994504	0.0100382	0.00784372	0.00888079	0.010111	0.0109044	0.00871691	0.00995025	0.00991832	0.00917431	0.00945546	0.00928841	0.00896539	0.00925926	0.0116125	0.00864731	0.00877483	0.00860897	0.0120732	0.00796339	0.0118437	0.00622248	0.00973437	0.00935175	0.00894996	0.00536673	0.00578838	0.0118954	0.00253165	0.0120482	0.00480307	0.0041365	0.0057971	0.00508144	0.0050993	0.00847734		0.00396825
	0.0111111	0.0139665	0.00990099	0.0100137	0.00773259	0.00887624	0.00994391	0.0108719	0.00870511	0.00992494	0.00991779	0.00916031	0.00945541	0.00925926	0.00892857	0.00924642	0.0115607	0.00856862	0.00874377	0.00860617	0.0120625	0.00795487	0.0117797	0.00621645	0.00970874	0.00934268	0.008916	0.00536513	0.00573271	0.0118878	0.00252525	0.0119403	0.0047976	0.00413388	0.00578499	0.00508044	0.00506757	0.00844979		0.00396825
	0.0111085	0.0139448	0.00988701	0.0100021	0.00771798	0.00885827	0.00994244	0.0108486	0.00868213	0.00991872	0.00990099	0.00915141	0.00937474	0.00924214	0.0089153	0.00920649	0.0114638	0.00854378	0.00873506	0.00860165	0.0120482	0.00788271	0.0117302	0.00621118	0.00968523	0.00931966	0.00890752	0.00536193	0.00573175	0.0118815	0.00251256	0.0119195	0.00479512	0.00412493	0.00576943	0.00503572	0.00505549	0.00841584		0.00395257
	0.0111072	0.0139113	0.00988166	0.00992301	0.00766104	0.0087691	0.00990589	0.0108471	0.00868092	0.00987798	0.00989228	0.00910706	0.00932234	0.00922819	0.00891243	0.00913113	0.0114562	0.00848951	0.00871656	0.0085709	0.0120324	0.00781816	0.0116946	0.00617708	0.00968013	0.00931167	0.0088854	0.00534562	0.00570012	0.0118778	0.00250627	0.0118215	0.00478589	0.00412437	0.00574713	0.00502798	0.00505476	0.00840022		0.00390625
	0.0110954	0.0139058	0.00986105	0.00992248	0.00764818	0.00874525	0.00990099	0.0108001	0.00866456	0.00985878	0.00989082	0.00909403	0.0093174	0.00919893	0.00889551	0.00912564	0.0114395	0.00848806	0.00868357	0.0085579	0.0119834	0.00779065	0.0116793	0.00613968	0.00964311	0.00930093	0.00885967	0.00534402	0.00568541	0.0118641	0.00249377	0.0117994	0.00477845	0.00408998	0.00573192	0.00501901	0.00504071	0.00839536		0.00390625
	0.0110313	0.0138924	0.00983108	0.00991654	0.00764439	0.00873025	0.00988275	0.0107811	0.00864553	0.00985419	0.00984482	0.00908938	0.00930127	0.00918385	0.00887886	0.00909977	0.0114327	0.00846995	0.00867232	0.00854993	0.0119733	0.00778786	0.0116598	0.00609292	0.00963855	0.00926377	0.00883132	0.00533064	0.00567175	0.0118463	0.00246914	0.011748	0.00476758	0.00408781	0.00570661	0.00500715	0.00503778	0.00838574		0.00383142
	0.0110228	0.0138072	0.00981354	0.00987329	0.00756972	0.00870777	0.00988142	0.0107741	0.00863276	0.00976909	0.00981924	0.00907112	0.00924005	0.00918079	0.00883861	0.00905716	0.0114183	0.00846934	0.00863827	0.00849188	0.0119658	0.00770416	0.0116102	0.00609185	0.00963391	0.00924758	0.00882879	0.0053286	0.00566038	0.0118421	0.00246305	0.0115951	0.00473588	0.00406407	0.00564633	0.00497608	0.00503778	0.00837554		0.00383142
	0.010992	0.0138062	0.00975368	0.00986582	0.00750512	0.00867592	0.00988024	0.0107468	0.00860529	0.00976063	0.00981532	0.00906892	0.0092393	0.00918069	0.00881834	0.00904159	0.0113931	0.00840437	0.00862476	0.00847663	0.0119503	0.00768733	0.0116028	0.00605385	0.00962746	0.00922131	0.00878594	0.00532104	0.005652	0.0118233	0.00242131	0.0115335	0.00473343	0.00405405	0.00563326	0.00490497	0.00501475	0.00837521		0.00383142
	0.010989	0.0137787	0.00974603	0.00983057	0.00743187	0.00866051	0.00987654	0.0106731	0.0085902	0.0097561	0.00976018	0.00906217	0.00922946	0.00917759	0.00880978	0.00902527	0.0113798	0.00832507	0.0086145	0.00841866	0.0119382	0.00765707	0.0116009	0.00605362	0.00956586	0.00921736	0.00876754	0.00527937	0.00560399	0.0118162	0.00240964	0.0114428	0.00469484	0.00403711	0.00558313	0.00489258	0.00500835	0.00835073		0.00380228
	0.010989	0.0136705	0.00970455	0.00982742	0.00743007	0.00864266	0.00986079	0.0106455	0.00857043	0.00975479	0.00975209	0.00903737	0.00922622	0.00917431	0.0087896	0.00899428	0.0113293	0.00830565	0.0086139	0.00833577	0.0118911	0.00764981	0.0115903	0.00603136	0.00954376	0.0091683	0.00867874	0.00526936	0.00558399	0.0117281	0.00240964	0.0114262	0.00466681	0.00401559	0.00556586	0.00486618	0.00500817	0.00834376		0.0037843
	0.0109635	0.0136612	0.00969758	0.00980247	0.00740567	0.00862999	0.00984304	0.0106286	0.0085657	0.00963139	0.00972843	0.00902935	0.00915504	0.00913242	0.00878862	0.00898404	0.0112936	0.00829876	0.00859359	0.00833573	0.0118483	0.00763643	0.0115311	0.0060171	0.00954198	0.00915332	0.00866308	0.00526495	0.00557325	0.0117178	0.00240385	0.0114167	0.00466418	0.004	0.00553272	0.00486027	0.00499792	0.00832095		0.00377358
	0.0109464	0.0136612	0.00958711	0.00979492	0.00737327	0.00861052	0.00982268	0.0106282	0.00855992	0.00959158	0.00971026	0.00902364	0.00912779	0.00913004	0.00877915	0.00897455	0.0112721	0.00828553	0.00858896	0.00828157	0.0118353	0.00759494	0.0115242	0.0060063	0.00952759	0.00914121	0.00855939	0.00525279	0.00555042	0.0116847	0.00240385	0.0113167	0.0046344	0.0039662	0.00553097	0.00485934	0.00499307	0.0082912		0.00377358
	0.0109041	0.0136501	0.00958522	0.00977126	0.00734574	0.0086001	0.00981595	0.0105541	0.00855342	0.00956836	0.00970232	0.00901639	0.00911119	0.0091257	0.00877193	0.00897364	0.0112623	0.00827472	0.0085389	0.00821837	0.0118107	0.00755972	0.0114904	0.00598802	0.00950872	0.00909866	0.00851152	0.00523865	0.00553797	0.0116493	0.00239234	0.0112894	0.00462304	0.00393419	0.00551809	0.00485746	0.00498176	0.00829111		0.00377358
	0.0108488	0.0136095	0.00957889	0.00974659	0.00729652	0.00859707	0.00976476	0.0104857	0.00853659	0.00955531	0.00968293	0.0090076	0.00909918	0.00911689	0.00875901	0.00894945	0.0112524	0.0082332	0.0085298	0.00821575	0.0117707	0.00755002	0.0114823	0.00597652	0.00949367	0.00909857	0.0084708	0.0052356	0.00550747	0.0116482	0.00238663	0.011274	0.0046225	0.00392749	0.00551615	0.00485699	0.00497773	0.00817121		0.00377358
	0.010826	0.0135894	0.00947177	0.00972502	0.00725174	0.00854701	0.0097561	0.0104822	0.00850232	0.00954654	0.00967742	0.0089849	0.00907868	0.0091104	0.0087241	0.00894515	0.0112448	0.00822737	0.00850532	0.00818382	0.0117502	0.00752987	0.0114776	0.00596896	0.00943149	0.00907788	0.0084618	0.00522388	0.0054878	0.0116279	0.00238663	0.0112583	0.00461056	0.00391517	0.00549713	0.0048506	0.0049776	0.00816583		0.0037594
	0.0108156	0.0135356	0.00941792	0.00968736	0.00723451	0.00850461	0.00975081	0.0104693	0.00848963	0.00954555	0.00967699	0.00896686	0.00906469	0.00901868	0.00870594	0.00893871	0.0111871	0.0081536	0.00848584	0.00817439	0.0117361	0.00751391	0.0114308	0.00592454	0.0093794	0.00907716	0.00842584	0.00522193	0.00546199	0.0115996	0.00238663	0.011236	0.00461007	0.00390625	0.00548518	0.00484984	0.00496166	0.00816151		0.0037594
	0.0107817	0.0135299	0.00940439	0.00966522	0.00721785	0.00847409	0.00972591	0.0104005	0.00847931	0.00945301	0.00966184	0.00896496	0.00906081	0.00899333	0.00868936	0.00883512	0.0111821	0.00809969	0.0084788	0.00816327	0.0117357	0.00749786	0.0114274	0.00591716	0.00937406	0.00907399	0.00840497	0.00517114	0.0054615	0.011596	0.0023753	0.011229	0.00459559	0.00389864	0.00543718	0.00483559	0.00494901	0.00813654		0.00374532
	0.0107319	0.0135245	0.00933162	0.00965924	0.00721756	0.00844232	0.00969787	0.0103852	0.00847672	0.00945153	0.0096495	0.00896126	0.00905723	0.00898389	0.00866745	0.00882353	0.0111568	0.00808754	0.00844194	0.00815419	0.0116903	0.007431	0.0113611	0.00586756	0.00931551	0.00905334	0.00838816	0.00516707	0.00544959	0.0115395	0.00229885	0.011065	0.00458664	0.00387973	0.00540123	0.00482823	0.00493097	0.00813409		0.00374065
	0.0106854	0.0134478	0.00932203	0.0096453	0.00719597	0.00843882	0.00964706	0.0103273	0.00839596	0.00944397	0.00964067	0.00895934	0.00904353	0.00896606	0.00865657	0.00877193	0.0111241	0.0080429	0.00843882	0.00808429	0.0116822	0.00736648	0.0113379	0.00585751	0.00931264	0.00901379	0.00831192	0.00515464	0.00544465	0.0115346	0.00229885	0.0110041	0.00453196	0.00382441	0.00539811	0.00482315	0.00492156	0.00813323		0.00373832
	0.0106545	0.0133913	0.00932091	0.00956023	0.00717189	0.00842656	0.00963565	0.0103215	0.00837599	0.00943545	0.00962199	0.0088968	0.00901857	0.00895522	0.00862069	0.00871811	0.0111231	0.00802469	0.00843694	0.00807185	0.0116595	0.00734639	0.0113208	0.00585652	0.00929487	0.00899435	0.00830641	0.00515464	0.00544366	0.0115218	0.00229358	0.0109861	0.00452489	0.00382409	0.00536108	0.00480979	0.00490998	0.00813133		0.00373134
	0.0106525	0.013383	0.00930289	0.00945822	0.00717131	0.00840436	0.00959147	0.010249	0.0083603	0.00940734	0.00951508	0.0088968	0.00900016	0.00894645	0.00862069	0.00870605	0.0111211	0.0080081	0.00841672	0.00803529	0.0116428	0.00727622	0.0113117	0.00577305	0.00925553	0.00899405	0.0083022	0.00512736	0.00544135	0.0115141	0.00229358	0.0108827	0.00452489	0.00382374	0.00534759	0.00479512	0.00490196	0.00812442		0.00373134
	0.0106302	0.0133671	0.00929724	0.00944978	0.0071472	0.00839092	0.00957488	0.0102421	0.00834073	0.00940707	0.00950594	0.00889248	0.00898551	0.00891089	0.00861266	0.00866885	0.0110585	0.00797872	0.00839251	0.0080135	0.0116137	0.00727618	0.0112274	0.00572929	0.00921273	0.00898087	0.00830062	0.00512711	0.00543971	0.0115058	0.00228311	0.0108432	0.00451213	0.00382357	0.00534188	0.00477931	0.0048976	0.00812018		0.00372787
	0.0106232	0.0133574	0.00928361	0.00942873	0.00714286	0.00838013	0.00957137	0.0102222	0.00832517	0.00939208	0.00947695	0.0088853	0.00894454	0.00885347	0.00860215	0.00865884	0.0110479	0.00796178	0.00838294	0.0079096	0.0115777	0.00718465	0.0112022	0.00571973	0.0091623	0.00897532	0.00829848	0.00511207	0.00542495	0.0114847	0.00228311	0.0107782	0.00449775	0.00381932	0.00531726	0.00477555	0.00489716	0.00811162		0.00371747
	0.0106063	0.0133567	0.00927937	0.00936255	0.0071347	0.00837949	0.00955782	0.0102115	0.00822657	0.00934798	0.00946687	0.00888395	0.00894398	0.00884096	0.0085885	0.00865691	0.0110132	0.00794913	0.00831848	0.0078473	0.0115765	0.00717703	0.0111931	0.00570305	0.00914808	0.00895037	0.00829708	0.00510257	0.00540541	0.0114554	0.00228311	0.0106922	0.00448998	0.00381787	0.0052755	0.00475059	0.00487277	0.00809557		0.0037037
	0.010582	0.0133559	0.00927819	0.00935754	0.0070922	0.00837004	0.00953137	0.0101998	0.00821578	0.00931677	0.00943396	0.00882804	0.00890869	0.00880652	0.00856837	0.00865653	0.0109944	0.00784929	0.00827235	0.00780488	0.0115709	0.00714286	0.011162	0.00566616	0.00913043	0.00891729	0.00827275	0.00508369	0.00539957	0.0114485	0.0022779	0.0106308	0.00447483	0.00381679	0.00524635	0.00472534	0.00485837	0.00805713		0.00369004
	0.0105771	0.0133478	0.00926146	0.00932712	0.00706653	0.00836729	0.0094931	0.0101925	0.00820273	0.00931366	0.00942928	0.00881575	0.00889802	0.00877455	0.00854376	0.00864937	0.0109479	0.00777531	0.00826953	0.00780193	0.0115598	0.00708502	0.0111562	0.00564381	0.00905877	0.00888252	0.00825346	0.00507937	0.00535906	0.0114449	0.0022779	0.010583	0.00447307	0.00381173	0.00521669	0.00472441	0.00485437	0.00802724		0.00369004
	0.0105214	0.0133168	0.00923817	0.00928	0.00706626	0.0083607	0.00946155	0.010112	0.00820138	0.00930152	0.00941127	0.00881057	0.00888308	0.00877193	0.00853789	0.00863309	0.0109244	0.00774069	0.00826162	0.00774336	0.0115407	0.00705716	0.0111298	0.00561183	0.00905119	0.00881523	0.00815715	0.00507548	0.00533333	0.0113869	0.00227273	0.0105263	0.00446889	0.00381078	0.00519076	0.00470367	0.00481155	0.00802616		0.00367647
	0.010512	0.0133088	0.00922351	0.00926612	0.00706147	0.00832961	0.00945798	0.0100984	0.0081954	0.00923555	0.00939986	0.00877906	0.00886942	0.00873886	0.00853054	0.00860131	0.010917	0.00773036	0.00823271	0.0077427	0.0115385	0.00704225	0.0111111	0.00561047	0.0089852	0.00873591	0.00815419	0.00506051	0.00532481	0.0113636	0.00227273	0.0104475	0.00445828	0.00381038	0.00516987	0.00469925	0.00479731	0.00802377		0.00364964
	0.0105079	0.0132753	0.00919893	0.00922348	0.00704409	0.00829795	0.00943209	0.0100652	0.00813913	0.00923206	0.00932779	0.00875581	0.00884495	0.00869757	0.00850662	0.00857477	0.0108481	0.00769928	0.00822737	0.00770548	0.0114719	0.00703048	0.0111111	0.00557289	0.00890493	0.00872516	0.00813953	0.00505051	0.00529634	0.0113279	0.00226757	0.0104299	0.00445779	0.0038055	0.00512821	0.00469224	0.00478978	0.00801966		0.00362319
	0.0105042	0.0132222	0.00917431	0.0092233	0.00703565	0.00829282	0.00937012	0.00996933	0.00813323	0.0092257	0.00931776	0.00875386	0.0088411	0.00869565	0.00849927	0.00857277	0.0107801	0.00763192	0.00821355	0.00765567	0.0114665	0.00699301	0.0110417	0.00555655	0.00884244	0.0086753	0.00813234	0.00503688	0.00526778	0.0113269	0.00226757	0.0104132	0.00445236	0.0037851	0.00511771	0.00468096	0.00477707	0.008		0.00361011
	0.0104671	0.0131579	0.00911109	0.00921187	0.00700066	0.00824446	0.00918431	0.00993214	0.00809781	0.0092195	0.00931677	0.00875274	0.00883206	0.00869133	0.00848242	0.00854953	0.0107463	0.00762171	0.00821051	0.0076467	0.0114449	0.00696864	0.0110268	0.00553584	0.00882523	0.00867484	0.00809199	0.00503525	0.00525762	0.0113147	0.00226244	0.0103787	0.00445104	0.00376056	0.00510595	0.00467952	0.00477707	0.0079791		0.00357143
	0.0104627	0.0131527	0.00910816	0.00918318	0.00699953	0.00823132	0.00917951	0.00992908	0.00807754	0.00921305	0.00928587	0.00873362	0.00879588	0.00867491	0.00848219	0.00854306	0.0107383	0.00756322	0.00819288	0.00761421	0.0114052	0.00691027	0.0110075	0.00553385	0.00877743	0.00859107	0.00801225	0.00503356	0.00520291	0.0113144	0.00226244	0.0103758	0.00443459	0.00373493	0.00504732	0.0046735	0.00476948	0.00797426		0.00357143
	0.0104549	0.0131014	0.00906344	0.00914257	0.00696171	0.0082012	0.00915839	0.00984792	0.00805375	0.00910984	0.00926135	0.00873108	0.0087668	0.00863232	0.00847047	0.00853971	0.01069	0.00754593	0.00819156	0.00757645	0.0113684	0.0068918	0.0109204	0.00551914	0.00875796	0.00858013	0.00798771	0.00498523	0.00518135	0.0112976	0.00226244	0.0103327	0.00442243	0.00373286	0.00502884	0.00466905	0.00474973	0.00796901		0.00356888
	0.0104482	0.0130826	0.00906081	0.00908773	0.00694444	0.00820098	0.00913416	0.00980881	0.008	0.00907071	0.00919985	0.00871203	0.0086821	0.00861783	0.00845509	0.00853943	0.0106655	0.0075337	0.00815901	0.00757576	0.0113136	0.00688326	0.0109149	0.00548182	0.00872002	0.00857843	0.00798036	0.00496196	0.00515464	0.0112909	0.00226244	0.0103306	0.00440529	0.00373201	0.00502008	0.00465929	0.00474496	0.0079687		0.00355872
	0.0104167	0.0130417	0.00901266	0.00907862	0.00693189	0.00815661	0.00912514	0.00980261	0.00799817	0.00906828	0.00917475	0.00867073	0.00864865	0.00859656	0.00842021	0.00852053	0.0106545	0.00747126	0.00812408	0.0075188	0.0112918	0.00685871	0.0108969	0.00543774	0.0086514	0.00856164	0.00797408	0.0049554	0.00512821	0.0112755	0.00225734	0.0102881	0.00439754	0.00373052	0.00498008	0.00463623	0.00473538	0.00795174		0.0035461
	0.0104138	0.0130378	0.00900901	0.00907287	0.00691187	0.00813723	0.00907668	0.00969177	0.00797656	0.00906783	0.00912721	0.00865562	0.0086458	0.00857564	0.00840667	0.00851466	0.0106437	0.00743014	0.00808526	0.00750017	0.0112865	0.00685602	0.0108696	0.00541712	0.00856164	0.00854701	0.00795545	0.00494071	0.00511378	0.011236	0.00225734	0.0102783	0.00439496	0.00372912	0.00497512	0.0046281	0.00473435	0.00794439		0.0035461
	0.0103795	0.0130219	0.00900409	0.0090612	0.00690799	0.00805412	0.00904393	0.00967982	0.00792793	0.00904977	0.00911983	0.00865287	0.00864045	0.00854701	0.00840336	0.00851301	0.0106383	0.00737207	0.0080801	0.00745413	0.011236	0.00684411	0.0108282	0.00541063	0.00843198	0.00850366	0.00794531	0.00493016	0.00510421	0.011236	0.00225734	0.0102663	0.00439018	0.00372787	0.00495805	0.00460606	0.00473037	0.00793351		0.00350877
	0.0103547	0.0130069	0.00898058	0.00905673	0.00690714	0.00804829	0.00903506	0.00964852	0.00792631	0.00902176	0.0091051	0.0086495	0.00863118	0.00854701	0.00840336	0.00847745	0.0106302	0.00736863	0.00802977	0.00745239	0.0111861	0.00671141	0.0108173	0.00536398	0.00841193	0.0084514	0.00793876	0.00492341	0.00509684	0.0112247	0.00225225	0.0102325	0.00438917	0.00372439	0.004951	0.00460005	0.00472953	0.00792142		0.00350877
	0.0103298	0.0129607	0.00896586	0.00904486	0.00690482	0.00804639	0.00903342	0.00964063	0.00789474	0.00901901	0.00908851	0.00863019	0.0086278	0.00850762	0.00839785	0.00846906	0.0106247	0.00735048	0.00800317	0.00743752	0.0111739	0.00667215	0.0107854	0.00535578	0.00840744	0.0084317	0.00791855	0.00491243	0.00509091	0.0112219	0.00224215	0.0101444	0.00438443	0.00369715	0.00491663	0.00459442	0.00469043	0.00791296		0.0034965
	0.0103292	0.0129593	0.00894415	0.00902315	0.00688449	0.00802544	0.00902165	0.00961153	0.00785797	0.00898279	0.00905879	0.00862999	0.0086246	0.00850629	0.00837188	0.00843373	0.0106101	0.00734574	0.00798428	0.00738264	0.0111397	0.00663086	0.0107635	0.00533708	0.00840336	0.00841987	0.0078772	0.00491228	0.00508069	0.0112216	0.00224215	0.0101406	0.00437887	0.00369491	0.00490485	0.00458453	0.00464862	0.00786104		0.0034965
	0.0103211	0.0129243	0.00890519	0.00897891	0.00688104	0.00799918	0.00901104	0.00959233	0.00785783	0.00896359	0.00905536	0.00861863	0.0086072	0.0085034	0.0082923	0.00841428	0.0106033	0.00732959	0.00795455	0.00733995	0.0111127	0.00662598	0.0106438	0.00533449	0.00837571	0.00838482	0.00785757	0.00490669	0.0050564	0.0111111	0.00223714	0.0101327	0.00437158	0.00369094	0.00489817	0.0045711	0.00464396	0.00784314		0.00347222
	0.0103125	0.012909	0.00887728	0.00895606	0.00685352	0.00798258	0.00894765	0.00956807	0.00785503	0.00894855	0.00892179	0.00859501	0.008605	0.00850229	0.00829016	0.00841093	0.010574	0.00732416	0.00792983	0.00733075	0.011052	0.00660194	0.0105988	0.00531915	0.00837373	0.00837547	0.00784314	0.00489967	0.00504202	0.0110531	0.00223214	0.0100553	0.0043713	0.00369004	0.00488998	0.00456131	0.00464396	0.00783972		0.00346021
	0.0102881	0.0128738	0.00884486	0.00894737	0.00682457	0.00796225	0.00890985	0.00955691	0.00785297	0.00894476	0.00891011	0.00858112	0.00860255	0.0084964	0.0082785	0.00840689	0.010573	0.00725042	0.00792783	0.00732682	0.0109909	0.00659574	0.0105963	0.00530906	0.00834971	0.00830946	0.00784006	0.00489682	0.00502934	0.0110508	0.00223214	0.0100492	0.00436522	0.00368295	0.00488	0.00455487	0.00463847	0.00782651		0.00346021
	0.0102835	0.0128658	0.00877053	0.00894368	0.00682128	0.00794214	0.00890828	0.00952717	0.00780745	0.00893142	0.0088968	0.00853588	0.00857287	0.00848794	0.0082397	0.00839054	0.0105189	0.00723327	0.00790656	0.00729927	0.0109722	0.00655922	0.0105817	0.00529101	0.00833947	0.00830258	0.00782779	0.00483019	0.00500626	0.01104	0.00222222	0.0100399	0.00436168	0.00368284	0.00485794	0.00454424	0.00463378	0.00781577		0.00344828
	0.0102732	0.0128228	0.00876201	0.00891111	0.00681115	0.00793292	0.00889002	0.00950976	0.0077821	0.00890681	0.0088844	0.00847458	0.00856164	0.00845666	0.00823893	0.00838082	0.0104958	0.00721193	0.00788164	0.00726392	0.0109609	0.00655683	0.0105634	0.00528512	0.00832013	0.00828402	0.0078275	0.0048226	0.005	0.0110396	0.00222222	0.0100367	0.00434475	0.0036661	0.00485358	0.00452879	0.00462294	0.00780822		0.00344828
	0.010263	0.0127898	0.00872127	0.00888846	0.00680426	0.00792535	0.00886608	0.00950232	0.00776888	0.00890519	0.00887978	0.00841093	0.00855561	0.00845572	0.00821934	0.00836566	0.0104662	0.00719424	0.00788161	0.00719424	0.0109435	0.00655022	0.0105321	0.00528169	0.00830317	0.00825502	0.00782322	0.00482204	0.00496524	0.011031	0.00221729	0.0100301	0.00433394	0.00366239	0.00484694	0.004524	0.00460829	0.0078066		0.00343643
	0.0102411	0.0127834	0.00872002	0.00887728	0.00680075	0.00785038	0.00883838	0.00949874	0.00776603	0.00890361	0.00883797	0.00838451	0.00854057	0.00844238	0.00818158	0.00836431	0.0104227	0.00712468	0.00787891	0.00717274	0.010917	0.00650071	0.0104862	0.00527588	0.0082801	0.00823673	0.00781528	0.00481474	0.00494827	0.0109874	0.00221239	0.00997977	0.00432744	0.00366155	0.00482784	0.00452378	0.00458365	0.0077909		0.00342466
	0.0102	0.0127744	0.0087146	0.00887709	0.00677099	0.00785032	0.00882585	0.00945672	0.00773024	0.00890167	0.00883262	0.00836941	0.00852329	0.00836555	0.00816049	0.0083511	0.0104167	0.00711772	0.00787693	0.00716846	0.0109146	0.00648036	0.0104516	0.0052682	0.00819367	0.00820569	0.00781032	0.00480274	0.004947	0.0109685	0.00220264	0.00997817	0.0042997	0.00364999	0.00480695	0.00452034	0.00453172	0.00778752		0.00342466
	0.010167	0.0127531	0.00871119	0.00882768	0.00674612	0.0078472	0.00881402	0.00944783	0.00769043	0.00889383	0.00881523	0.00830406	0.0085175	0.00834492	0.00815162	0.00831981	0.0103878	0.00710594	0.00787154	0.0071459	0.0109054	0.00647841	0.0104384	0.00526135	0.00818452	0.00820358	0.00780691	0.00479693	0.00494604	0.010936	0.00220264	0.00997318	0.00429305	0.00364887	0.00479343	0.00449568	0.00452716	0.0077288		0.00338983
	0.0101657	0.0127374	0.00869565	0.00882029	0.0067433	0.00784683	0.00878735	0.00940439	0.00768891	0.00888709	0.00880075	0.00827423	0.00850247	0.00830487	0.00809659	0.00830641	0.0103806	0.00707814	0.00783699	0.00714286	0.0108969	0.00645351	0.0104322	0.00522876	0.00818041	0.00819672	0.00780572	0.00478469	0.00493827	0.0108803	0.0021978	0.00997083	0.00428266	0.00364631	0.00478469	0.00449438	0.00451671	0.00772093		0.00338983
	0.0101629	0.0127029	0.0086691	0.00876485	0.00674157	0.00783336	0.00876339	0.0093929	0.00768693	0.00885685	0.00874147	0.00825713	0.00847971	0.00828937	0.00803213	0.00829694	0.0103627	0.00705408	0.00781715	0.00711201	0.0108085	0.00644271	0.010431	0.0052249	0.00813953	0.00814382	0.00779754	0.00475668	0.00493827	0.0108729	0.0021978	0.00995025	0.00426699	0.00364146	0.00474684	0.0044843	0.00451628	0.0076911		0.00338983
	0.0101266	0.0127021	0.00866694	0.00871656	0.006728	0.00782315	0.00876024	0.00932804	0.00768022	0.00882641	0.00873621	0.00824279	0.00847091	0.00828864	0.00803213	0.00829187	0.0103383	0.00702553	0.00777461	0.00704428	0.0108025	0.00643974	0.0104257	0.00521945	0.00811655	0.00811725	0.00772288	0.00475436	0.00492746	0.0107165	0.00219298	0.00994546	0.00426656	0.00362428	0.00473513	0.00447518	0.0045082	0.00768142		0.00337838
	0.0100686	0.0127008	0.00866237	0.00870275	0.00672209	0.00781135	0.00874026	0.00929112	0.00768021	0.0087408	0.00870286	0.00818515	0.00847073	0.00827777	0.00801915	0.00825942	0.010327	0.0069797	0.00774221	0.00698385	0.0107697	0.00638978	0.0103809	0.00521908	0.00810081	0.00809935	0.00772126	0.00473934	0.004914	0.0106864	0.00218341	0.00989743	0.00425441	0.00361167	0.00472654	0.00447427	0.00446663	0.0076747		0.00337838
	0.0100114	0.0125476	0.00865914	0.00869565	0.00671917	0.0078072	0.00873181	0.00927536	0.00763359	0.00873016	0.00869187	0.00815158	0.00846395	0.00826298	0.00801049	0.00824742	0.0102881	0.00695872	0.00773931	0.00695322	0.0107565	0.00635488	0.010372	0.00520833	0.00805861	0.00805925	0.00771534	0.00471281	0.00490998	0.0106545	0.00218341	0.00986193	0.0042508	0.00360505	0.00472409	0.00447316	0.00446242	0.00760165		0.00337838
	0.01	0.0125414	0.00865052	0.00869565	0.00671785	0.00778547	0.00871125	0.00925926	0.00759734	0.00871119	0.00868025	0.00813249	0.0084516	0.00822732	0.00797976	0.00824176	0.0102564	0.00694988	0.00771895	0.00694444	0.0107541	0.00631121	0.0103343	0.00520743	0.0080429	0.00805124	0.00769702	0.00469116	0.00490196	0.0106332	0.00217865	0.00985222	0.00424628	0.00358686	0.00472279	0.00446728	0.00444265	0.00758214		0.00337838
	0.00997768	0.0125402	0.00863033	0.00865499	0.00670466	0.00778423	0.00870196	0.00925417	0.00757576	0.00870076	0.00867618	0.00813084	0.00843245	0.00813104	0.00793651	0.00821244	0.0102516	0.00694025	0.00769513	0.00689732	0.0107413	0.00629508	0.0103286	0.00516717	0.00801374	0.00792974	0.00769698	0.00468604	0.00487908	0.0105644	0.0021692	0.00979624	0.00423729	0.00358225	0.0047013	0.00446304	0.00442779	0.0075787		0.00337838
	0.00996299	0.0125	0.00862423	0.00864198	0.0066901	0.00777664	0.00866707	0.00922576	0.00757576	0.00866251	0.0086698	0.00811565	0.00842764	0.00806227	0.00793021	0.00821011	0.0102467	0.00693722	0.00765585	0.00687255	0.0107252	0.00624379	0.0103093	0.00515464	0.00801012	0.00792733	0.00766998	0.00465564	0.00487013	0.0105597	0.0021692	0.00979237	0.0042293	0.00358166	0.00470054	0.00445878	0.00441501	0.00756144		0.003367
	0.00995025	0.012451	0.00858209	0.0086402	0.00668982	0.00772559	0.00866426	0.00921016	0.00756716	0.00864774	0.00865977	0.0081097	0.00841112	0.00804698	0.00790583	0.00819088	0.0102466	0.00693443	0.00763669	0.00686695	0.0107198	0.00624122	0.0102953	0.0051495	0.00799574	0.00792507	0.00765536	0.00465116	0.00483991	0.0105263	0.00215983	0.00977869	0.00421585	0.00356005	0.00469938	0.00445696	0.00440252	0.00756056		0.003367
	0.00992608	0.0124113	0.00855962	0.00862774	0.00666667	0.0077212	0.00865248	0.0092081	0.00755396	0.00864731	0.00856875	0.00807723	0.00840853	0.00802334	0.00789634	0.00817397	0.0102459	0.00692273	0.00762922	0.00686071	0.0106695	0.00619381	0.0102846	0.00512821	0.00795229	0.00791557	0.00763689	0.00464516	0.0048376	0.0105068	0.00215054	0.00976928	0.00421323	0.00355015	0.00467144	0.00443568	0.00438596	0.00755829		0.0033557
	0.00991469	0.0123872	0.00854271	0.00858152	0.00666325	0.00769909	0.00857449	0.00920245	0.00754332	0.00863931	0.00854474	0.00805524	0.00840189	0.00800493	0.00788917	0.00816283	0.0102289	0.00691602	0.00762825	0.00684932	0.0106691	0.00618196	0.0102293	0.00512821	0.00793966	0.00791557	0.00761228	0.00462963	0.0048226	0.0105047	0.00213675	0.00976205	0.00421053	0.0035461	0.00467047	0.00443459	0.00438596	0.00753207		0.00332226
	0.00989315	0.0123853	0.00851835	0.008579	0.00665281	0.00765436	0.00857213	0.00911967	0.00752372	0.00863309	0.00852619	0.00802092	0.0083725	0.008	0.0078637	0.00811542	0.0101843	0.0068875	0.00761489	0.00683891	0.010668	0.00613497	0.0101971	0.00512666	0.00788792	0.00788955	0.00761099	0.00462493	0.00481928	0.010499	0.0021254	0.00974373	0.00420547	0.00354045	0.00466926	0.00442968	0.00435624	0.0075		0.00332226
	0.00986707	0.0123796	0.00851343	0.008577	0.00665188	0.00764604	0.00855223	0.00911944	0.0075126	0.00862883	0.00851789	0.00801603	0.00835028	0.0079034	0.00782779	0.00810953	0.0101333	0.00688423	0.00760456	0.00679067	0.010641	0.00612648	0.0101695	0.00511945	0.0078637	0.00788821	0.00757942	0.00460387	0.00481638	0.0104977	0.00212314	0.00973111	0.00418848	0.00351711	0.00465616	0.004403	0.00434783	0.00749518		0.00332226
	0.00986572	0.0123695	0.00850065	0.00857296	0.00663265	0.00763677	0.00855107	0.00905563	0.00750898	0.00857143	0.00851287	0.00798566	0.00833789	0.00789025	0.00781489	0.0080709	0.0100956	0.00688406	0.0075777	0.00678403	0.0106383	0.0061263	0.0101302	0.00507614	0.00785238	0.00787037	0.00754579	0.00459841	0.00480669	0.0104628	0.00211864	0.00972927	0.00418379	0.0035169	0.00465033	0.00440067	0.00434311	0.00749064		0.00331126
	0.00985568	0.0123474	0.00846483	0.00856031	0.00659486	0.00760512	0.00852018	0.00905041	0.0075	0.00854884	0.00850375	0.00796813	0.00829673	0.00788099	0.0078125	0.00805854	0.010043	0.00687907	0.00757493	0.00676306	0.0106209	0.00610387	0.010101	0.00505713	0.00782845	0.00777797	0.00753453	0.00459098	0.0047619	0.0104621	0.00211864	0.00972583	0.00417661	0.00350631	0.00464936	0.00439297	0.00433197	0.00748092		0.00330033
	0.00983267	0.0123127	0.00841844	0.00850947	0.0065625	0.00758866	0.00850785	0.00902406	0.00746269	0.00852739	0.00849197	0.00795455	0.00826626	0.00786211	0.00780787	0.00803213	0.00999412	0.00687043	0.00755578	0.00675952	0.0105842	0.00608094	0.0100967	0.00505051	0.00782748	0.00777739	0.00750077	0.00457782	0.00475185	0.0104376	0.00211416	0.00969985	0.00417068	0.00350263	0.00464422	0.00439239	0.00433168	0.00747615		0.00330033
	0.00982486	0.012301	0.00840116	0.0085077	0.00655172	0.00754717	0.00849257	0.00901239	0.00745115	0.00850857	0.0084616	0.00792826	0.00825168	0.00782509	0.00779493	0.00801673	0.00999334	0.00686642	0.00754672	0.00673401	0.0105725	0.00604378	0.0100272	0.00503723	0.00782382	0.00772376	0.00744735	0.00453202	0.00474834	0.010341	0.00211416	0.00968477	0.00416667	0.0034965	0.0046263	0.00436681	0.00430918	0.00745841		0.00327869
	0.00980777	0.0122501	0.00838926	0.00850581	0.00652819	0.00746617	0.00849017	0.00897443	0.00744281	0.00848896	0.00844619	0.00792733	0.00823193	0.00781893	0.00775523	0.00801282	0.00998004	0.00685179	0.00751299	0.00672114	0.0105076	0.00603543	0.0100247	0.00503541	0.00775194	0.00770895	0.0074364	0.00451467	0.00471698	0.0103014	0.0021097	0.00967049	0.00415408	0.00345261	0.00457472	0.00432299	0.00428016	0.00744186		0.00324675
	0.00978992	0.0121585	0.00834561	0.00849195	0.00651136	0.00744362	0.00841311	0.00892857	0.00742814	0.00848395	0.00839933	0.00792472	0.00821162	0.0078125	0.00773085	0.00798866	0.0099728	0.00681537	0.0075067	0.00671853	0.0104921	0.00598908	0.00997672	0.00502513	0.00770479	0.00768535	0.0074228	0.00449691	0.00469326	0.0102504	0.0021097	0.00958818	0.00414277	0.00345238	0.00454442	0.00431499	0.00425532	0.00741077		0.00324675
	0.00978294	0.0121212	0.00834144	0.00849126	0.0064971	0.00743282	0.00838498	0.00888383	0.00742441	0.00847458	0.00833842	0.00791311	0.00821135	0.00780419	0.00769889	0.00792254	0.00997151	0.00676183	0.0075	0.00669809	0.010486	0.00595855	0.00996062	0.00500835	0.00768	0.00767321	0.00740881	0.00448594	0.00467563	0.0102362	0.00210526	0.00957956	0.00410994	0.00343971	0.00454158	0.0043064	0.00425144	0.00740815		0.00324675
	0.00977995	0.0119688	0.00834125	0.00848564	0.00649103	0.00732218	0.00834379	0.00888344	0.00741608	0.00846689	0.00833333	0.00791226	0.00819516	0.00777202	0.00769865	0.00790306	0.00990344	0.006755	0.00749319	0.00664452	0.0104846	0.00595504	0.00995146	0.00500245	0.00762094	0.00766385	0.00740257	0.00448248	0.00466954	0.0101669	0.00210526	0.00955414	0.00410798	0.00343643	0.00451671	0.00430311	0.00424662	0.00738751		0.00324675
	0.00973481	0.0119605	0.00833123	0.00846906	0.00646364	0.00728766	0.00829128	0.00883392	0.00740801	0.00845187	0.00831255	0.00781494	0.00818903	0.00777202	0.0076568	0.0078534	0.00990099	0.00674861	0.00746269	0.00656045	0.0104771	0.00590067	0.00994883	0.0049778	0.00761207	0.00765783	0.00738363	0.00448129	0.00466853	0.0101615	0.00209644	0.00950391	0.00410467	0.00343525	0.00450535	0.0042796	0.00423177	0.00738503		0.00323625
	0.00972195	0.0119594	0.00832906	0.00846391	0.00645279	0.00725222	0.00826699	0.00879044	0.00740741	0.00843937	0.00830999	0.0078125	0.00816009	0.00776662	0.00764143	0.00783913	0.00988701	0.00672834	0.00740889	0.00654736	0.010449	0.00589753	0.00989305	0.00493635	0.00760286	0.0076201	0.00737243	0.00445655	0.00466853	0.0101025	0.002079	0.00944206	0.00410354	0.00343466	0.00447984	0.00426894	0.00422654	0.00735135		0.00322581
	0.00968054	0.0119469	0.00829551	0.00845411	0.00643196	0.00723109	0.00826446	0.00875947	0.00737705	0.00837281	0.00830484	0.00780042	0.00814792	0.00776398	0.00763359	0.00783689	0.0098804	0.00672626	0.00740242	0.00653798	0.0104289	0.00587496	0.00989058	0.00493421	0.00760095	0.00759669	0.0073712	0.00444804	0.00466284	0.0100592	0.00207469	0.00942973	0.00409556	0.00342906	0.00446429	0.00423878	0.00422634	0.00733333		0.00320513
	0.00967326	0.0119387	0.00829219	0.00843997	0.00640021	0.00721278	0.00825889	0.00875778	0.00737294	0.0083682	0.00828283	0.00779936	0.00814751	0.00776119	0.00761474	0.0078317	0.00987013	0.00672582	0.00735294	0.00651913	0.0104143	0.00585606	0.00988822	0.00493097	0.00757576	0.00758956	0.00735745	0.00444677	0.00464037	0.0100489	0.00207469	0.00931363	0.00407576	0.00341925	0.00445493	0.00422777	0.00421842	0.00730438		0.00319489
	0.00966913	0.0119072	0.00828402	0.00841447	0.00639429	0.00721256	0.00819672	0.00872654	0.00736127	0.00835452	0.008206	0.00774117	0.00813835	0.00775916	0.0075847	0.00780508	0.00985222	0.00671665	0.00732257	0.0065123	0.0103825	0.00585574	0.00988811	0.00492708	0.00755192	0.00758294	0.00734121	0.00444444	0.0045977	0.0100464	0.00207039	0.00931298	0.00407563	0.00341476	0.00445104	0.00418577	0.00421257	0.00728711		0.00318471
	0.00966417	0.0118476	0.00827467	0.00841043	0.00638357	0.0072074	0.00819672	0.00871137	0.00735294	0.00834376	0.0081458	0.00773994	0.00806994	0.00774336	0.00752051	0.00777316	0.00977654	0.00671141	0.00730412	0.0064911	0.0103566	0.00583245	0.00984683	0.00491873	0.0075006	0.00758001	0.00733696	0.00443614	0.00459348	0.0100091	0.00206612	0.00929573	0.0040688	0.00341408	0.00444561	0.00417362	0.00421053	0.00727371		0.00318471
	0.00964411	0.0118355	0.00826912	0.00839383	0.0063745	0.00720689	0.00818452	0.00868455	0.00732845	0.0083212	0.0080999	0.00772035	0.00806192	0.00768787	0.0075188	0.00776765	0.00974252	0.00671141	0.00728184	0.00647172	0.0103566	0.00582889	0.00981524	0.00487329	0.00749064	0.00756972	0.0073278	0.00442968	0.00451671	0.00997268	0.00206612	0.00925212	0.00404585	0.00340467	0.00444225	0.00417236	0.00419456	0.00727358		0.00318471
	0.00962989	0.011811	0.00823045	0.00837603	0.00635302	0.00718563	0.00815587	0.00866225	0.00730994	0.00831025	0.00808898	0.00770599	0.00805422	0.00768362	0.00750962	0.0077506	0.00974224	0.00669555	0.0072538	0.00641873	0.0103011	0.00581395	0.00981317	0.00486833	0.00743714	0.00753915	0.00728745	0.00442152	0.0045045	0.00995866	0.00206612	0.00921659	0.0040436	0.00340441	0.00443813	0.00415937	0.00418795	0.00726271		0.0031746
	0.00961827	0.0117704	0.00821373	0.00831322	0.00634652	0.00717992	0.00813575	0.00857339	0.00723673	0.00826446	0.00807081	0.00770192	0.00803908	0.00766929	0.00749239	0.00769408	0.00972763	0.00666187	0.00720378	0.00641167	0.0102825	0.00581395	0.00975683	0.00485916	0.00738007	0.00751547	0.00728131	0.00441963	0.00449871	0.00990636	0.00206612	0.00915332	0.0040404	0.00340393	0.00443009	0.00414564	0.00418616	0.007242		0.0031746
	0.00959575	0.0117419	0.00821355	0.00822771	0.00632111	0.00717703	0.0081234	0.00851943	0.00722892	0.00826156	0.00806452	0.00769309	0.00803689	0.00765847	0.00748947	0.00768719	0.00968617	0.00663717	0.00718757	0.0063857	0.0102041	0.00581066	0.00972029	0.00485535	0.0073692	0.00751011	0.00725689	0.00441628	0.00448065	0.00985486	0.00206186	0.0091095	0.00403956	0.00339716	0.0044142	0.00414469	0.00417537	0.00721501		0.00316456
	0.00957996	0.0117005	0.00819062	0.00822594	0.00631875	0.00716846	0.00810764	0.0085034	0.00722362	0.0082291	0.00805055	0.00765624	0.00803656	0.00765585	0.00748744	0.00766284	0.00958904	0.00662252	0.00716065	0.00637994	0.0101911	0.0057947	0.00971275	0.00485437	0.00734312	0.00748951	0.00723953	0.00440421	0.0044603	0.0098463	0.00205761	0.00906125	0.00403606	0.00339271	0.00440186	0.00414365	0.00417469	0.00719942		0.00316456
	0.00953839	0.0116974	0.00818764	0.00820793	0.00631579	0.00716242	0.00810521	0.00846702	0.0071912	0.00820463	0.00804945	0.00765249	0.00802407	0.00761523	0.00748503	0.00763807	0.00958206	0.0065912	0.00715903	0.00637743	0.0101897	0.0057652	0.00971236	0.00483092	0.00722804	0.00744186	0.00723407	0.00439883	0.00443459	0.00981823	0.00205339	0.00904281	0.00402576	0.00338642	0.00439018	0.0041425	0.00416667	0.00717569		0.00315457
	0.00949425	0.0116903	0.00817439	0.00817284	0.00631406	0.00711985	0.00808683	0.0084332	0.00717602	0.00819224	0.00803461	0.00762612	0.00801857	0.00759101	0.00744955	0.00759648	0.00949796	0.00658915	0.00714659	0.00634345	0.0101864	0.00573504	0.00967742	0.00481203	0.00720721	0.00743833	0.00719823	0.00438009	0.00443459	0.00974377	0.00205339	0.00904159	0.00401114	0.00338457	0.00438276	0.00409924	0.00416558	0.00709648		0.00314465
	0.00947522	0.0116732	0.00816697	0.00816009	0.00631054	0.00711744	0.00806794	0.00835013	0.00717574	0.00816327	0.00801818	0.00759931	0.00800392	0.00758035	0.00744864	0.00757111	0.00949525	0.00657354	0.00714529	0.00632372	0.010181	0.00572738	0.00963531	0.00480769	0.00720288	0.00742196	0.00718686	0.00437262	0.0044164	0.00970158	0.00205128	0.00901829	0.00399088	0.00337496	0.0043619	0.00409556	0.00415879	0.00707237		0.00314465
	0.00947075	0.0116193	0.00815303	0.00814996	0.0062954	0.00708941	0.00806452	0.00833333	0.00716958	0.00814947	0.00801353	0.00757576	0.00795612	0.00756534	0.00738488	0.00756234	0.00948767	0.00657259	0.00712366	0.00631662	0.0101749	0.00567205	0.00958658	0.00480559	0.00719683	0.00741163	0.00714286	0.00436764	0.00441501	0.0096949	0.00204918	0.00901104	0.00398655	0.00336511	0.00434837	0.00407332	0.00415225	0.00706266		0.00314465
	0.00945776	0.011587	0.00814078	0.00813008	0.00628272	0.00707497	0.0080591	0.00832039	0.00715361	0.00813292	0.00798641	0.00756901	0.00793651	0.00756219	0.00735294	0.00755337	0.00944669	0.00657246	0.007109	0.00629955	0.0101551	0.00564295	0.00957107	0.00479303	0.00718336	0.00740308	0.00711595	0.00434611	0.00438322	0.00968442	0.00204499	0.00898987	0.0039818	0.00335893	0.00433988	0.00406284	0.00414079	0.00702798		0.0031348
	0.00945274	0.0115463	0.00812686	0.00813008	0.00628155	0.00704225	0.00805343	0.00831328	0.00711133	0.00811604	0.00797711	0.00756726	0.00790287	0.00755668	0.00735294	0.00754812	0.00939597	0.00650446	0.007109	0.00621415	0.0101466	0.00559621	0.00954592	0.00479042	0.0071617	0.00738289	0.00709516	0.00432793	0.00438276	0.00964067	0.00204499	0.00896287	0.00397614	0.00335761	0.00433805	0.00405732	0.00413612	0.00700145		0.0031348
	0.00941567	0.0115193	0.00812128	0.00812183	0.00627854	0.00704225	0.00805215	0.00829513	0.0070922	0.00811527	0.00796964	0.00755173	0.00785873	0.00755256	0.00729927	0.00753012	0.00937951	0.00646204	0.0071033	0.00613497	0.0101394	0.00558343	0.00953499	0.00478755	0.00713861	0.00733578	0.00706628	0.00432776	0.00437956	0.0096	0.00203666	0.00894208	0.00395257	0.00335029	0.00433257	0.00405703	0.00412913	0.00698603		0.003125
	0.00940513	0.0115048	0.00808378	0.00811688	0.00626156	0.00704225	0.0080506	0.00829384	0.00708877	0.00808601	0.00796322	0.00752351	0.00784046	0.00754467	0.0072402	0.00746775	0.00936995	0.00645161	0.00709877	0.00611845	0.0101351	0.00558187	0.0095192	0.00478108	0.00713558	0.00733381	0.00701647	0.00432378	0.00437956	0.00957854	0.00203666	0.00892857	0.00395083	0.00334448	0.00433213	0.00403604	0.00412088	0.00688823		0.00310559
	0.00939165	0.0114943	0.00805952	0.00808625	0.00622524	0.00699301	0.00803043	0.00822073	0.00706961	0.00805833	0.00794678	0.00751697	0.00775988	0.00752338	0.00722674	0.00746269	0.00936864	0.00643511	0.00706291	0.00609847	0.010101	0.00557149	0.00950292	0.00476706	0.00713521	0.00731962	0.00701102	0.00431726	0.00436258	0.00955657	0.00203666	0.00892857	0.0039466	0.0033383	0.00430311	0.00402311	0.00411335	0.0068836		0.00309119
	0.0093881	0.0114824	0.00805332	0.00806668	0.00622321	0.0069808	0.00802612	0.00821918	0.00706677	0.00801039	0.00792079	0.00751084	0.00774818	0.00750704	0.00719132	0.00743399	0.00934034	0.00641103	0.00703606	0.00609512	0.010099	0.00556586	0.00949094	0.0047631	0.00713371	0.0073164	0.00701083	0.00430108	0.00434783	0.00952381	0.00203666	0.00887446	0.00394144	0.00333464	0.00429752	0.00400751	0.00411281	0.00687285		0.00308642
	0.00938338	0.011479	0.00804143	0.00806319	0.00621808	0.0069589	0.00800469	0.00820517	0.0070325	0.00797586	0.00785983	0.00747863	0.00774368	0.00749543	0.00716385	0.00742678	0.00933333	0.00641026	0.00702001	0.00609463	0.0100946	0.00555721	0.00938338	0.00474563	0.00710824	0.00730623	0.00699645	0.00429547	0.00434783	0.00952255	0.00201207	0.0088605	0.00393529	0.00332502	0.00429646	0.00399401	0.00411228	0.00686499		0.00307692
	0.00938158	0.0114638	0.00801909	0.00804392	0.00620816	0.00694554	0.00798458	0.00819847	0.00698341	0.00797045	0.00785368	0.00743494	0.00772947	0.00747556	0.00715244	0.00739796	0.00932091	0.00639659	0.0069979	0.0060906	0.0100376	0.00553557	0.00937658	0.00474496	0.00710365	0.00727273	0.00697979	0.00428266	0.00434109	0.00949945	0.00201207	0.00883002	0.00393138	0.00331074	0.00429236	0.00399379	0.00411184	0.00681756		0.00306748
	0.00937904	0.01142	0.00801374	0.00803581	0.00619606	0.00693374	0.00798212	0.00819672	0.00696215	0.00796406	0.00783848	0.007426	0.00772059	0.00747443	0.0070922	0.00739463	0.00929368	0.00638193	0.00699738	0.00606438	0.0100365	0.00553137	0.00937291	0.00473118	0.00708104	0.00726185	0.00697938	0.00427907	0.00432366	0.00946778	0.00200803	0.00879917	0.00392717	0.00330844	0.00428449	0.00398089	0.0041116	0.00680787		0.00306748
	0.009375	0.0114137	0.00801001	0.008	0.00619599	0.00690608	0.00796178	0.00818554	0.00695998	0.00792967	0.00782455	0.00742574	0.00771742	0.00744956	0.0070922	0.00735181	0.00928414	0.00636943	0.00696864	0.00602954	0.0100144	0.00551113	0.00933401	0.00470865	0.00706487	0.00726073	0.00695249	0.0042709	0.00431779	0.00942973	0.002	0.00872776	0.00391363	0.00330169	0.004277	0.00397189	0.0041101	0.00679456		0.0030581
	0.00936427	0.0114123	0.00800574	0.00798882	0.0061918	0.00688137	0.00790654	0.00817741	0.0069241	0.00791456	0.00781791	0.00741107	0.00771456	0.00743424	0.00708104	0.00732601	0.00927948	0.00634026	0.00696538	0.00601822	0.00999697	0.00547476	0.00929567	0.00469684	0.00705128	0.00721003	0.00694444	0.00427056	0.00430169	0.00942285	0.002	0.00868248	0.00387755	0.00330033	0.00426136	0.00395844	0.00409054	0.00677474		0.0030581
	0.00936369	0.0113931	0.00800569	0.00795481	0.00618459	0.00686878	0.00786782	0.00817504	0.00691959	0.00789364	0.00780852	0.00739941	0.00770512	0.00741334	0.00707786	0.00732575	0.00924898	0.0063244	0.006936	0.00597982	0.00996428	0.00544053	0.00928528	0.00466061	0.00700935	0.0071888	0.0069433	0.00424114	0.00428054	0.00939664	0.002	0.00864184	0.00382135	0.00328947	0.00425532	0.00392507	0.00408934	0.00676638		0.0030581
	0.00935374	0.0113842	0.00800213	0.00794834	0.00616579	0.00683995	0.00784245	0.00817021	0.00691476	0.00789058	0.00780031	0.00739142	0.00770294	0.00739372	0.00706714	0.00732113	0.00923169	0.00629224	0.00693001	0.00597839	0.00995248	0.0054386	0.00924214	0.00466045	0.00699513	0.00718654	0.00693213	0.0042257	0.00426894	0.00937866	0.00199203	0.00861832	0.00381497	0.00328947	0.00423971	0.00391802	0.00408325	0.00674469		0.0030581
	0.00934929	0.0113734	0.008	0.00791198	0.00614088	0.00683761	0.00784077	0.0081448	0.00691389	0.00788991	0.00779376	0.00738397	0.00770077	0.0073911	0.00706033	0.00730623	0.00919176	0.00627803	0.00692384	0.00597372	0.00992308	0.00542495	0.00921482	0.00465116	0.00699218	0.00716525	0.00691563	0.00422523	0.00426212	0.00932642	0.00198807	0.00860832	0.00380711	0.00328209	0.00417053	0.00390795	0.00407688	0.00674087		0.00304878
	0.00933076	0.0113139	0.00799776	0.00784753	0.00613433	0.0068354	0.0078125	0.00811524	0.00689605	0.00786241	0.00777548	0.00736498	0.00768902	0.00738675	0.00704535	0.00730036	0.00917431	0.00627063	0.00691916	0.00597129	0.00992204	0.00541883	0.0092129	0.00464396	0.00697924	0.00713591	0.00689028	0.00422337	0.0042523	0.00929173	0.00198413	0.00859974	0.00380117	0.00327869	0.00413615	0.00390173	0.0040678	0.00673813		0.00303951
	0.0093293	0.0112835	0.00796654	0.00784664	0.00609708	0.00681522	0.00780891	0.00809873	0.00689107	0.00786026	0.00775194	0.00734994	0.00766509	0.00737243	0.00704225	0.00728745	0.00916964	0.00626679	0.00691482	0.0059356	0.00990722	0.00541254	0.00919265	0.00463872	0.00695955	0.00711549	0.00688249	0.0042145	0.00424403	0.00929105	0.00198413	0.00857705	0.00379987	0.00327771	0.0041339	0.00388673	0.00406504	0.0067359		0.00303951
	0.00920245	0.0112556	0.00795455	0.00782779	0.00608949	0.00680851	0.00776096	0.00806693	0.00687838	0.00783253	0.00773337	0.00734956	0.00764867	0.00734375	0.00701199	0.00727626	0.00915033	0.00625377	0.00690714	0.00593301	0.00990099	0.0053919	0.0091811	0.00461113	0.00692361	0.00711011	0.00686342	0.00417766	0.00424328	0.00928422	0.00197628	0.00857415	0.00379507	0.00325651	0.00411523	0.0038835	0.00406042	0.00671918		0.00303951
	0.00920084	0.0112437	0.00793942	0.0078125	0.00608273	0.00680638	0.00775467	0.00804954	0.00684262	0.00782823	0.00771938	0.00731314	0.00764693	0.00733549	0.00700525	0.0072314	0.0091001	0.00616197	0.00689348	0.00593144	0.00990099	0.00537634	0.00915332	0.00459294	0.00691937	0.0071048	0.00686106	0.00416973	0.00423012	0.00928074	0.00197239	0.00854197	0.00378109	0.00324763	0.00411088	0.00386681	0.00405351	0.00671759		0.0030303
	0.00918853	0.0112306	0.00793651	0.00780031	0.00607181	0.00679596	0.00773861	0.00803723	0.00684039	0.00782376	0.0077187	0.00727854	0.00763631	0.00732201	0.00700483	0.00721336	0.0090999	0.00616183	0.00689056	0.00591907	0.00990099	0.00537634	0.00910163	0.0045672	0.00690738	0.00707436	0.00683666	0.00416125	0.00421433	0.00925314	0.00197239	0.00848929	0.0037803	0.00324177	0.00410634	0.00386527	0.00404858	0.00670807		0.0030303
	0.00918836	0.0112219	0.00793257	0.00777087	0.00606469	0.00679056	0.00769941	0.00801564	0.00683501	0.00782361	0.00769231	0.00724483	0.00763359	0.00731707	0.00698904	0.00720813	0.00908403	0.00612662	0.00685748	0.00591825	0.00988051	0.00534918	0.00909682	0.00455892	0.00688299	0.0070713	0.00683548	0.00415343	0.00420168	0.00924716	0.0019685	0.00846818	0.00377919	0.00321925	0.00409431	0.00386212	0.0040404	0.00669493		0.0030303
	0.00915388	0.0112163	0.00792777	0.0077688	0.00606061	0.00678571	0.00769724	0.00801192	0.00683371	0.00781789	0.00767612	0.00724278	0.00759013	0.00730893	0.00698617	0.00717922	0.00907716	0.00611937	0.00681737	0.00591527	0.00986526	0.0053363	0.00906736	0.00454228	0.00688145	0.00706991	0.00682891	0.00414456	0.00418848	0.00921891	0.00196464	0.0083362	0.00377893	0.00319698	0.00408789	0.00385728	0.00403633	0.00668449		0.0030303
	0.00915099	0.0112123	0.00792275	0.00774997	0.00605426	0.00676731	0.00768984	0.00796915	0.00683347	0.0077969	0.00765795	0.00722781	0.00757498	0.00729386	0.0069858	0.00716896	0.00906843	0.00611487	0.00681431	0.00589294	0.00984386	0.0053357	0.00903576	0.00453074	0.00684211	0.00705716	0.00682415	0.00413223	0.00417412	0.00919215	0.00195695	0.00831003	0.00377774	0.00318134	0.00408251	0.00385109	0.00403078	0.00665132		0.00302115
	0.00913678	0.0112022	0.00783936	0.00774426	0.00604576	0.00676395	0.00768037	0.00796511	0.00683198	0.00778816	0.00763165	0.0071511	0.00755754	0.00728759	0.00697906	0.00715746	0.00903172	0.00610998	0.00673239	0.00588684	0.00983191	0.00533213	0.00886602	0.00452716	0.00676285	0.00705143	0.00680904	0.00413101	0.00417163	0.00917852	0.00195695	0.0083034	0.00371978	0.00317987	0.00405645	0.00384725	0.00402091	0.00665004		0.00302115
	0.00911002	0.0111964	0.00782998	0.00774353	0.0060249	0.00673401	0.00765117	0.00793385	0.00679656	0.00777999	0.00760034	0.00713739	0.00752508	0.00726487	0.00697888	0.00714853	0.00903104	0.00610207	0.0067193	0.00584024	0.00982115	0.00533109	0.00885049	0.00451467	0.00675961	0.00700117	0.00680544	0.004112	0.00415993	0.00916434	0.00195695	0.00829572	0.00371345	0.00317595	0.00404676	0.00383556	0.00401021	0.00664767		0.00302115
	0.0090978	0.0111663	0.0077821	0.00774172	0.00601132	0.00672372	0.00764331	0.00793288	0.0067727	0.00776484	0.00758503	0.00713703	0.00752141	0.0072648	0.00696936	0.00714286	0.00902815	0.00609952	0.00671772	0.0057971	0.00979912	0.00531915	0.0088331	0.00449438	0.00675893	0.00699513	0.00677638	0.00410889	0.00414938	0.00913733	0.00195695	0.00827815	0.00371195	0.00317292	0.00404449	0.00382514	0.00398406	0.0066459		0.00301205
	0.00909577	0.0111623	0.00775355	0.00773931	0.00597525	0.00670241	0.00760043	0.00790294	0.00676064	0.00774214	0.00756107	0.00713436	0.00752122	0.00724638	0.00696258	0.00713776	0.00900164	0.00609756	0.00671556	0.00578827	0.00971341	0.00530973	0.00883246	0.00448934	0.00675087	0.00698766	0.00674506	0.0040568	0.00414079	0.00912067	0.00195312	0.00819638	0.0037111	0.00317243	0.00403912	0.00382514	0.00395979	0.00661746		0.003003
	0.00907487	0.0111623	0.00774914	0.00772715	0.00596455	0.00669263	0.00758784	0.00790167	0.00675806	0.00769071	0.0075541	0.00711201	0.00752046	0.00723982	0.00695019	0.00712758	0.00897666	0.00606498	0.00670605	0.00578035	0.00970134	0.00529731	0.00874517	0.00447427	0.00674916	0.00698254	0.00672646	0.0040532	0.00413068	0.00906056	0.00195312	0.00819548	0.0037037	0.00316717	0.00403551	0.00380228	0.00394811	0.0066129		0.00298507
	0.00907396	0.0111581	0.00773237	0.00770925	0.0059322	0.00667823	0.00755124	0.00787845	0.00672932	0.00768855	0.00753059	0.0071076	0.00750144	0.00723509	0.00694904	0.00710445	0.00894701	0.00606022	0.00669875	0.00575744	0.00969977	0.00529252	0.0087222	0.00446686	0.00672646	0.00696958	0.00671704	0.00405028	0.00412882	0.00905524	0.00195312	0.00817844	0.0037037	0.00316216	0.0039987	0.00379816	0.00393236	0.00660396		0.00296736
	0.00905898	0.0111549	0.00770195	0.00769843	0.00593022	0.00663243	0.00754717	0.00787283	0.00671636	0.00768105	0.00752813	0.00710227	0.00749064	0.00723054	0.00694381	0.0070922	0.00894104	0.00604365	0.00668351	0.00575658	0.00969496	0.00526552	0.00872093	0.00444821	0.00669216	0.00694324	0.00669257	0.00403412	0.00411749	0.00901455	0.00195312	0.00817077	0.00369949	0.00316159	0.00399867	0.00379027	0.00392297	0.00660109		0.00295858
	0.00904662	0.0111368	0.00769769	0.00767754	0.00592751	0.00661241	0.0075266	0.00787037	0.00671441	0.00762722	0.00748988	0.00709001	0.00746153	0.00721719	0.00692562	0.00705882	0.00893471	0.00603261	0.00667678	0.00575448	0.00962649	0.00525934	0.0086701	0.00444761	0.00668954	0.00693527	0.00669003	0.00403226	0.00411281	0.00898166	0.00195312	0.00814536	0.00368694	0.00314663	0.00395904	0.00378	0.00390816	0.00659077		0.00295858
	0.00901756	0.0111254	0.00769231	0.00766343	0.00590822	0.00660661	0.00749965	0.00784827	0.00670933	0.00750738	0.00746269	0.00706402	0.00745363	0.00721241	0.00689022	0.00705456	0.00892359	0.0060241	0.00665698	0.00575285	0.0096238	0.00525486	0.00866739	0.00442641	0.00667741	0.00692726	0.00668037	0.00402103	0.00409417	0.00897868	0.00194932	0.00812672	0.00368189	0.00314398	0.00394657	0.00375405	0.00390795	0.00657305		0.00295858
	0.00900735	0.0110919	0.0076678	0.00764981	0.00590752	0.00660161	0.00747245	0.00782341	0.00668926	0.00747741	0.00743812	0.0070593	0.00744417	0.00720865	0.00688623	0.0070407	0.00890411	0.00596953	0.00665307	0.0057511	0.0096085	0.00524599	0.00865266	0.00442087	0.00665457	0.00692354	0.00666082	0.00400844	0.00408719	0.00895017	0.00194175	0.00808519	0.00367165	0.0031407	0.00391608	0.00373932	0.00390117	0.00656743		0.00294985
	0.00896394	0.0110728	0.00766509	0.00763873	0.00590479	0.00659359	0.00746697	0.00781841	0.00667302	0.00744977	0.00741935	0.00704225	0.00743494	0.00720721	0.00688613	0.00703819	0.00889454	0.00592795	0.00661084	0.00574713	0.00956656	0.00523122	0.00865	0.00441501	0.00661813	0.00691901	0.00665966	0.00399069	0.0040858	0.0089465	0.00194175	0.00804598	0.00367002	0.00312695	0.00391489	0.00373853	0.00390117	0.00655738		0.00294118
	0.00896243	0.011055	0.00761162	0.00761874	0.00589971	0.00659196	0.0073736	0.00781759	0.00665728	0.00744821	0.00739411	0.00702844	0.00739604	0.00716215	0.00687907	0.00703805	0.00888231	0.00591239	0.00659457	0.00574518	0.00953699	0.00522193	0.00864865	0.00437876	0.00660876	0.00690276	0.00665966	0.00398583	0.00407861	0.00892459	0.00193798	0.00803213	0.00365327	0.00312663	0.00390891	0.00372717	0.00389273	0.00654433		0.00294118
	0.00895968	0.0110546	0.00760778	0.00760534	0.00585075	0.00657728	0.00736422	0.00780162	0.00665478	0.00744522	0.007369	0.00702189	0.00739372	0.00713918	0.00685484	0.00700563	0.00882029	0.00589195	0.00658762	0.00571378	0.00951845	0.00521173	0.00863309	0.00436681	0.00659164	0.00690199	0.00665484	0.00398406	0.00406977	0.0089172	0.00193798	0.00802139	0.00365159	0.003125	0.00389389	0.00370637	0.00389105	0.00653511		0.00293255
	0.00895522	0.0110319	0.00759494	0.00760513	0.00584215	0.00654722	0.00734101	0.00777754	0.00664515	0.00744071	0.00736266	0.00701447	0.0073903	0.0070922	0.00685337	0.00700399	0.00875465	0.00585592	0.00658233	0.00570692	0.0094518	0.00520658	0.00860585	0.00436047	0.00657197	0.00685109	0.00663936	0.0039796	0.00406229	0.00891169	0.00193798	0.00800836	0.00364178	0.0031211	0.00389105	0.00368249	0.00388579	0.0065331		0.00292398
	0.0089481	0.0110279	0.00758474	0.0075751	0.00578453	0.00653785	0.0073318	0.00774771	0.00663746	0.00741351	0.00735895	0.00701403	0.00737527	0.00708737	0.00684571	0.00699475	0.00874284	0.00583134	0.00657959	0.0057053	0.00941307	0.00520575	0.00854449	0.00435161	0.00656934	0.00684211	0.00661521	0.00396226	0.00406091	0.00891021	0.00193798	0.00800801	0.00363795	0.00311997	0.00388601	0.00367918	0.0038674	0.00651076		0.00291545
	0.00893286	0.0110065	0.00758471	0.0075606	0.0057554	0.00652327	0.00729313	0.0077343	0.00663394	0.00740519	0.00732443	0.00700158	0.00732601	0.00704225	0.00684433	0.00699423	0.0087241	0.00582751	0.006574	0.00569715	0.00939212	0.00518953	0.00851224	0.00434934	0.00654818	0.00683995	0.00661157	0.00395062	0.00402783	0.00886263	0.00193424	0.00796484	0.00362882	0.00310592	0.003885	0.00364139	0.00386372	0.00650593		0.00290698
	0.00892591	0.0109083	0.00758332	0.0075067	0.00575409	0.00651556	0.007287	0.00768893	0.00662057	0.00740164	0.007313	0.00699732	0.00732024	0.00702421	0.00683371	0.00699399	0.00871394	0.00582363	0.0065699	0.00568618	0.00938967	0.00518583	0.00850897	0.00434499	0.00652842	0.00683507	0.00660964	0.0039488	0.00401837	0.0088407	0.0019305	0.00794393	0.00361757	0.00309764	0.0038642	0.0036104	0.00386242	0.00649718		0.00289855
	0.00892288	0.0109027	0.00757038	0.00747996	0.00574756	0.00650599	0.00728383	0.00768322	0.00659611	0.00739469	0.00727393	0.00697192	0.00729927	0.00701262	0.00681981	0.00697092	0.00870827	0.00578577	0.00655264	0.00567707	0.00933428	0.00518001	0.00849308	0.00434092	0.00650821	0.00681851	0.00660147	0.0039312	0.00400267	0.00883672	0.0019305	0.0079023	0.00359793	0.00309478	0.00385834	0.0036081	0.00385642	0.00647836		0.00289017
	0.00892122	0.0108947	0.00755602	0.00747556	0.00572583	0.00649819	0.00727158	0.00768246	0.00655022	0.00737427	0.00722204	0.00695652	0.0072732	0.00698934	0.00681199	0.00696583	0.00869986	0.00577868	0.00654121	0.00566394	0.0093317	0.00516987	0.00848823	0.00432959	0.00650325	0.00680388	0.00659824	0.00392837	0.0039968	0.00883002	0.00192678	0.00787402	0.00358709	0.00309278	0.00385215	0.00359324	0.00384404	0.00645018		0.00288184
	0.00891152	0.0108794	0.00745931	0.00746269	0.00572454	0.00647355	0.00726542	0.00768123	0.00654088	0.0073736	0.00722022	0.0069465	0.00725995	0.00697722	0.00679895	0.00696235	0.00869925	0.00576943	0.00653595	0.00563419	0.00930233	0.00516819	0.0084443	0.00430005	0.00647748	0.00679887	0.00657833	0.00392542	0.00399467	0.00882872	0.00192678	0.0078712	0.00356373	0.00309119	0.00384082	0.00358905	0.00383632	0.00644195		0.00288184
	0.00890723	0.0108688	0.00744879	0.00745941	0.00568586	0.00647249	0.00725639	0.00766335	0.00653917	0.00736988	0.00720527	0.00694444	0.00724864	0.00694259	0.00678958	0.00695825	0.00867303	0.00572221	0.00649862	0.00562272	0.00929919	0.00516034	0.00842697	0.00429024	0.00642792	0.00679625	0.00655738	0.00392054	0.00398406	0.0088267	0.00191939	0.00785855	0.00355527	0.00307692	0.00383907	0.00358744	0.00383487	0.00641546		0.00288184
	0.00889404	0.0108597	0.00744706	0.00744879	0.00568573	0.0064257	0.00723561	0.00764154	0.00652546	0.00736969	0.00719856	0.00693756	0.00724638	0.00693178	0.00677156	0.00689655	0.00866974	0.00569936	0.00649626	0.00559441	0.00927981	0.00515996	0.00840336	0.00428495	0.00642579	0.00678925	0.00651755	0.00391645	0.0039604	0.00880626	0.00191939	0.00782236	0.00355215	0.00307365	0.00382476	0.00358423	0.00383073	0.00641386		0.00288184
	0.00885906	0.0108345	0.00743836	0.00743802	0.00565571	0.00640056	0.00721211	0.0076199	0.00643432	0.00734788	0.00718874	0.00692552	0.00724399	0.00691617	0.00676983	0.00686741	0.00862789	0.00565689	0.0064927	0.00558659	0.00927835	0.00515464	0.00839695	0.00428169	0.00641907	0.00678656	0.00649569	0.0039093	0.00395257	0.00877193	0.00191939	0.00781418	0.00353033	0.00307344	0.0037962	0.00357603	0.00382691	0.00640369		0.0028777
	0.00883864	0.0108286	0.00743387	0.0074234	0.00564869	0.00638883	0.00720721	0.00760456	0.00643321	0.00733993	0.00717857	0.00692464	0.00720034	0.00691516	0.00676329	0.00683466	0.00861746	0.00563631	0.00646067	0.00556825	0.0092427	0.00515464	0.00836587	0.004273	0.00639886	0.00677565	0.00645393	0.00389864	0.00393701	0.00877193	0.00191388	0.00780142	0.00351906	0.00306928	0.00379219	0.00357536	0.00382374	0.00638037		0.00287356
	0.00883257	0.0107599	0.007431	0.0074191	0.00564304	0.00636943	0.00720384	0.00759192	0.00640598	0.00732759	0.00711744	0.00691367	0.00719171	0.00691063	0.00675393	0.00683395	0.0086145	0.00562701	0.00643713	0.00556483	0.00917431	0.00515071	0.00834455	0.0042618	0.00636943	0.00676869	0.00644313	0.00389813	0.00393013	0.00876827	0.00191205	0.00776197	0.003517	0.00304709	0.00379198	0.00355591	0.00382135	0.00637156		0.00287356
	0.00882943	0.0107571	0.007431	0.00741198	0.00559701	0.0063593	0.0071995	0.00759076	0.00639937	0.00732717	0.00711281	0.00691017	0.00717656	0.00687202	0.00674482	0.00683316	0.00858496	0.00561798	0.00643463	0.00553975	0.00916819	0.00514555	0.0083437	0.00424929	0.00630496	0.00676655	0.00640639	0.00389755	0.0039267	0.0087668	0.00191205	0.00771137	0.00351213	0.00304006	0.0037797	0.00355429	0.00380952	0.00635089		0.00285714
	0.00880461	0.0107324	0.00739958	0.0073831	0.00557297	0.00632911	0.00719199	0.00757576	0.00637959	0.00730668	0.00708297	0.00689543	0.00716228	0.00685312	0.00673575	0.00682323	0.0085796	0.00556977	0.00640868	0.00553787	0.00913596	0.00511985	0.0083314	0.00422833	0.00628733	0.00676344	0.00639574	0.00389105	0.00392597	0.00874508	0.00191205	0.00770333	0.00350467	0.00304003	0.00377358	0.00352941	0.00379719	0.00634501		0.002849
	0.00879483	0.0107127	0.00735128	0.00738065	0.00551344	0.00627185	0.00717918	0.00757576	0.00635702	0.00727884	0.00708024	0.00686813	0.00711549	0.00681748	0.00672731	0.0068227	0.00855019	0.00556088	0.00632385	0.00553097	0.00910125	0.00508733	0.00825206	0.00421053	0.00624882	0.00676247	0.00639367	0.00388956	0.00392061	0.00868689	0.00189036	0.00770189	0.00349854	0.0030305	0.00375704	0.00352436	0.00378619	0.00634434		0.002849
	0.00878256	0.0106829	0.00729927	0.00738007	0.00550232	0.00625056	0.00717806	0.00757337	0.00631001	0.00727884	0.007074	0.00686656	0.0071004	0.00681566	0.00672269	0.00682128	0.00853659	0.00554236	0.00630019	0.00549642	0.0090761	0.0050813	0.00824897	0.00420168	0.00623564	0.00675567	0.00639256	0.00388192	0.00391304	0.00866474	0.00188679	0.00768996	0.00349406	0.00301742	0.00375	0.00351124	0.00378148	0.00629765		0.002849
	0.00878049	0.0106693	0.00728863	0.00736377	0.00547984	0.00624917	0.00716987	0.00755668	0.00629921	0.007249	0.007071	0.00684736	0.00707965	0.00680272	0.00671141	0.00681918	0.00852167	0.00554187	0.00628931	0.00548697	0.00903614	0.00507614	0.00823271	0.00419972	0.00621293	0.00675429	0.0063857	0.00388048	0.0039128	0.00866069	0.00188679	0.00767157	0.0034904	0.00301403	0.00374231	0.00350877	0.00378072	0.00625547		0.00283286
	0.00877193	0.0106491	0.00727802	0.00735407	0.00546672	0.00621917	0.00716703	0.0075188	0.0062711	0.00723473	0.00706567	0.00683761	0.00707547	0.00679432	0.00668213	0.00678733	0.00847458	0.00549382	0.00628674	0.0054816	0.0089944	0.00506385	0.00822004	0.00418687	0.00614512	0.00674226	0.00635798	0.00387214	0.00390952	0.00853018	0.0018622	0.00766284	0.00348635	0.00300177	0.00373074	0.00350723	0.00378017	0.00625		0.00282486
	0.00874636	0.0106342	0.00727273	0.00734574	0.00546117	0.00621118	0.00716224	0.0075172	0.00626239	0.0072314	0.00704564	0.00683157	0.0070738	0.0067917	0.0066681	0.00677736	0.00847158	0.00549073	0.00627663	0.00546448	0.008994	0.00504975	0.00821018	0.00417827	0.00613497	0.00672269	0.00631712	0.00386954	0.00390244	0.00850611	0.0018622	0.00766058	0.00348533	0.00299871	0.00373045	0.00350721	0.00377953	0.00622499		0.0028169
	0.00873839	0.0106169	0.00726141	0.00732012	0.00545752	0.00616438	0.00714286	0.00751691	0.00622689	0.00722963	0.00699469	0.00682276	0.00706714	0.00678674	0.00666667	0.00671141	0.0084686	0.00547945	0.00624707	0.00544917	0.00895058	0.00504847	0.00819672	0.00416988	0.00609857	0.00669842	0.00630282	0.0038615	0.00390244	0.00846262	0.00181159	0.00763962	0.00348289	0.00299618	0.00372638	0.00349192	0.00377834	0.00621118		0.0028169
	0.00867428	0.0105922	0.0072381	0.00730964	0.00545703	0.00616384	0.00712302	0.00749792	0.0061772	0.00722601	0.00698758	0.00679432	0.00705408	0.00678303	0.00666519	0.00668474	0.00846154	0.00547196	0.00621118	0.00540541	0.00893997	0.00503235	0.00818882	0.00416927	0.00608656	0.00669736	0.0063012	0.00385902	0.0038961	0.00845277	0.00180832	0.00761731	0.0034662	0.0029867	0.00372493	0.00347947	0.00376266	0.0061924		0.0028169
	0.00865209	0.0105765	0.00723415	0.00728422	0.0054315	0.00614647	0.00712166	0.00745757	0.00615725	0.00721705	0.00697926	0.00673401	0.00701801	0.00677966	0.00662728	0.00667594	0.00843486	0.00544703	0.00618965	0.00540339	0.00892857	0.00502344	0.00818554	0.00415512	0.00605602	0.00669643	0.00630063	0.00385131	0.00388199	0.00843359	0.00179533	0.00760999	0.00345679	0.00298507	0.00372055	0.00347557	0.00375281	0.00618632		0.00280899
	0.00864118	0.0104585	0.00722222	0.00727867	0.00542373	0.00614422	0.00708737	0.00745226	0.00613968	0.00719895	0.0069735	0.00671937	0.00699301	0.00676989	0.00662252	0.00667161	0.00838574	0.00539957	0.00618698	0.00540091	0.00888701	0.00500683	0.00817439	0.00414718	0.00598251	0.00669507	0.00629874	0.00382409	0.00387472	0.00842275	0.00179211	0.00758725	0.00345622	0.00298507	0.00371885	0.00347149	0.00374584	0.00618511		0.00280899
	0.00855337	0.0104499	0.007189	0.00726437	0.00542273	0.00614394	0.00708642	0.00743034	0.00610054	0.00718791	0.00695771	0.00670891	0.00695134	0.00676619	0.00660649	0.00665281	0.00836707	0.00538204	0.00618338	0.00539326	0.00886285	0.005	0.00815217	0.0041461	0.00596843	0.00669188	0.00628931	0.00381716	0.00386634	0.00840657	0.00178571	0.00756014	0.00344828	0.00298123	0.00371854	0.00345969	0.00374444	0.00617379		0.00280112
	0.00855223	0.0104422	0.00714948	0.00724638	0.0054181	0.0061417	0.00706849	0.00741716	0.00609185	0.00718348	0.00695716	0.00670209	0.00693541	0.00671925	0.00660106	0.006628	0.00836172	0.00537442	0.00613915	0.00537313	0.00885296	0.00497601	0.00814706	0.00414428	0.00594177	0.00668151	0.0062715	0.00381194	0.00384615	0.00834907	0.00178253	0.00755012	0.00344531	0.00298003	0.00369413	0.00345929	0.00374251	0.00614354		0.0027933
	0.00855223	0.0104359	0.00713955	0.00722892	0.00541746	0.00613952	0.00706268	0.00740885	0.00607639	0.00718157	0.00695518	0.00666543	0.00692318	0.00670691	0.00659537	0.00660859	0.00836172	0.00533808	0.00613165	0.00537057	0.00884428	0.00497117	0.00814042	0.00414261	0.00591935	0.00667379	0.0062715	0.0038053	0.00384172	0.00833699	0.00177936	0.00750375	0.00343528	0.00296943	0.0036839	0.00344696	0.0037415	0.0061287		0.0027933
	0.0085495	0.0104342	0.00710051	0.00722456	0.0054095	0.006129	0.00701839	0.00735887	0.00607477	0.00717463	0.00695266	0.00666496	0.00689259	0.0066502	0.00654721	0.00660024	0.00824985	0.00533742	0.00611527	0.00536769	0.00882862	0.00496278	0.00813008	0.00414201	0.0058318	0.00665083	0.00624264	0.0038036	0.00383693	0.00833182	0.00176056	0.00749319	0.00342556	0.00295473	0.0036836	0.00344607	0.00373428	0.00612445		0.00278552
	0.008524	0.0104099	0.00709849	0.00721958	0.00540061	0.00612313	0.00701754	0.00735795	0.00607287	0.00717066	0.00694541	0.0066587	0.00689121	0.00662714	0.00651411	0.00657492	0.00823422	0.00533239	0.00611439	0.00536193	0.00882807	0.00495979	0.00809717	0.00411138	0.00578972	0.00664688	0.00623105	0.00379472	0.00383142	0.00833032	0.00175131	0.00749064	0.00342146	0.00294877	0.00366789	0.00343703	0.00372629	0.00612095		0.00277008
	0.00851789	0.0103896	0.00707744	0.00718954	0.00539957	0.00608604	0.00700935	0.00733676	0.00607211	0.00716763	0.00694006	0.00665779	0.00688045	0.00662438	0.00650482	0.00656838	0.00821693	0.00532165	0.0061137	0.00536029	0.00881977	0.00494678	0.00807733	0.00410621	0.00574346	0.00660845	0.00623053	0.00379147	0.00381547	0.00830412	0.00175131	0.0074775	0.00340948	0.00294667	0.00366789	0.00343577	0.00372439	0.00610169		0.00276243
	0.00851723	0.0103683	0.00706845	0.00718672	0.0053679	0.0060412	0.0070056	0.00733075	0.00606061	0.00716215	0.00691669	0.00665362	0.00685963	0.00662252	0.00647429	0.00648763	0.00816993	0.00531915	0.00610948	0.00535332	0.00881907	0.0049416	0.00807537	0.00410416	0.00573614	0.0065967	0.00622852	0.00378993	0.00381194	0.00829952	0.00174825	0.00746037	0.00339905	0.00294365	0.00366569	0.00342349	0.00371885	0.00608343		0.00275482
	0.00851305	0.010363	0.00706605	0.00717471	0.00536673	0.00604102	0.00699844	0.0072867	0.00605748	0.0071599	0.00682819	0.0066252	0.00683561	0.0065917	0.00646627	0.0064836	0.00816024	0.00527792	0.00610083	0.00534027	0.00881612	0.00493675	0.00807459	0.004079	0.00570342	0.00657606	0.00621118	0.00378269	0.00381047	0.00829946	0.0017452	0.0074331	0.00339248	0.00292263	0.00365661	0.0034153	0.00371287	0.00604627		0.00274725
	0.00851277	0.0103517	0.00706311	0.00714963	0.00536604	0.00603793	0.00696056	0.00726496	0.00605071	0.00715334	0.00682594	0.00662083	0.00682788	0.00659089	0.0064	0.00645386	0.00814332	0.00527704	0.00606439	0.00531589	0.00879397	0.00493456	0.00801233	0.00407651	0.00562963	0.00657154	0.00619835	0.00377548	0.00380623	0.00829876	0.00173611	0.00742115	0.00338558	0.00292065	0.00365408	0.00341387	0.00370582	0.00604002		0.00273224
	0.00851064	0.010335	0.00704376	0.00713237	0.00535966	0.00603622	0.00692182	0.00724638	0.00603581	0.00714905	0.00681646	0.00660793	0.00682594	0.00657289	0.00639681	0.00642955	0.00808855	0.00527683	0.00604433	0.00528293	0.00877505	0.00491679	0.00800977	0.00406631	0.00556101	0.00656417	0.00619692	0.00376484	0.00380562	0.00825083	0.0017331	0.0073955	0.00338083	0.00288913	0.00365393	0.0034089	0.00370233	0.00602689		0.0027248
	0.00849315	0.0103281	0.00703288	0.00711974	0.00535834	0.0060241	0.00691973	0.00724474	0.00603175	0.00714711	0.00681545	0.00659824	0.00680581	0.00654173	0.00636695	0.0064261	0.00808625	0.00527459	0.00604382	0.00527183	0.00877407	0.00490597	0.0079457	0.00404676	0.0055585	0.00656325	0.00615431	0.00376294	0.00379939	0.00824105	0.00172712	0.0073554	0.00336574	0.00288521	0.00364856	0.00340651	0.00368284	0.00601837		0.0027248
	0.00848356	0.0103274	0.00697425	0.00710795	0.00534918	0.00602047	0.00689042	0.00722076	0.00602558	0.0071465	0.00680876	0.00655431	0.00679852	0.00653873	0.00636075	0.00642548	0.00807848	0.00526529	0.00602918	0.00526316	0.00876402	0.00489071	0.00794176	0.00404585	0.00555556	0.00654923	0.00614334	0.0037594	0.00379816	0.00822368	0.00171233	0.00734294	0.00334728	0.00287648	0.00363967	0.00340599	0.00367309	0.00601142		0.00272109
	0.00847458	0.0103273	0.00696353	0.00710153	0.00534449	0.0060198	0.00687907	0.00718209	0.00600787	0.00709569	0.00680244	0.00654022	0.00679747	0.00653026	0.00635363	0.00642336	0.00803443	0.00520156	0.00602523	0.0052496	0.00875912	0.00484848	0.00792921	0.00403009	0.00552232	0.00653249	0.00613097	0.00374971	0.00377834	0.00813323	0.00170358	0.00731776	0.00334728	0.0028716	0.00362662	0.0034055	0.00366636	0.00598926		0.00271739
	0.00847139	0.0102564	0.0069619	0.00709957	0.00532511	0.00600499	0.00687285	0.00718111	0.00599129	0.00705354	0.00675189	0.00653253	0.00677646	0.00652283	0.00635324	0.00642202	0.00802752	0.00518903	0.00599968	0.00524323	0.00875421	0.0048376	0.00790514	0.00402839	0.00551232	0.00648949	0.00612996	0.00374532	0.00377596	0.00813008	0.00170068	0.00731415	0.0033372	0.00286807	0.00361827	0.00340492	0.00365604	0.00596957		0.00271739
	0.00846168	0.0102464	0.00691722	0.00708917	0.00530162	0.00599237	0.00683723	0.00716443	0.00598291	0.007025	0.00673296	0.0065182	0.00677541	0.00651787	0.00635271	0.00638592	0.00802568	0.00516746	0.00596496	0.0052417	0.00874367	0.00483498	0.00789733	0.00402414	0.0055001	0.0064744	0.00610998	0.00374298	0.00376412	0.00811619	0.00168634	0.00731044	0.00332811	0.00286738	0.00361827	0.00338328	0.00365519	0.00596949		0.00271739
	0.00843984	0.0102343	0.00689655	0.00706138	0.00529101	0.00598998	0.00681104	0.0071459	0.0059747	0.00702028	0.00671501	0.00651264	0.00676745	0.00650888	0.00634146	0.00634723	0.00801068	0.00515207	0.00591716	0.00523883	0.00873696	0.00483092	0.0078637	0.00400882	0.00548267	0.00647006	0.0061065	0.0037415	0.00375811	0.00806846	0.00168634	0.00729867	0.00332542	0.00286182	0.00361071	0.00338295	0.00364964	0.00595926		0.00271003
	0.0084317	0.0102281	0.00688406	0.0070598	0.00527451	0.0059556	0.00679154	0.00712747	0.00597015	0.00701236	0.00669407	0.00649351	0.0067642	0.00649289	0.00633603	0.00634166	0.00799419	0.00513611	0.00589837	0.00520833	0.00873455	0.00481928	0.00782123	0.00400566	0.00546635	0.00646892	0.00608519	0.00373895	0.00374632	0.00805524	0.00168634	0.00723558	0.00331309	0.00286109	0.00360899	0.00336574	0.00364204	0.0059493		0.00271003
	0.00842764	0.0102236	0.00688274	0.00705555	0.00527307	0.00595374	0.00678794	0.00712392	0.00596874	0.00700809	0.00669235	0.00646646	0.0067375	0.00649286	0.00632852	0.00631912	0.00797774	0.00507072	0.00589766	0.00519849	0.00871627	0.00480684	0.00776197	0.00399657	0.00545571	0.00646067	0.00608519	0.00373552	0.00374532	0.00804094	0.00168634	0.0072314	0.00330873	0.00285307	0.00360685	0.00336511	0.00363989	0.00594019		0.0027027
	0.00841346	0.0102041	0.00688058	0.00703675	0.00525965	0.00595061	0.00678629	0.00711944	0.00595476	0.00699479	0.0066912	0.00645995	0.00671733	0.00648824	0.00626772	0.00630517	0.0079721	0.00506262	0.0058921	0.00518135	0.00871287	0.00479988	0.00774527	0.00399436	0.00541272	0.00644468	0.00608051	0.00373134	0.00374065	0.00803115	0.0016835	0.00722451	0.00330688	0.0028504	0.00360231	0.00336315	0.00363306	0.00593723		0.00269542
	0.00840572	0.0101896	0.00686362	0.00703518	0.00525138	0.0059061	0.00676918	0.00708919	0.0059322	0.00697039	0.00667111	0.00645338	0.00670215	0.00648508	0.00625978	0.0063012	0.00794439	0.00505747	0.00588965	0.00516796	0.00871183	0.00477897	0.00774336	0.00398633	0.00539487	0.0064395	0.00607076	0.003727	0.00373599	0.0080136	0.00167504	0.00717537	0.00330628	0.00284219	0.00359551	0.00336101	0.00363108	0.00593103		0.00269542
	0.00835716	0.0101764	0.00686162	0.00700623	0.0052356	0.00590585	0.00675533	0.00708327	0.00593203	0.00695726	0.00667048	0.00645161	0.00669594	0.00647627	0.00622597	0.00629143	0.00794101	0.00504886	0.00588347	0.00516796	0.00868289	0.00472186	0.00773652	0.00396825	0.00535117	0.00643696	0.00606367	0.00371457	0.00372613	0.00801181	0.00167224	0.0071478	0.00330004	0.0028399	0.00357995	0.00334784	0.00362894	0.00591716		0.00269542
	0.00835189	0.0101534	0.0068432	0.00699301	0.00523477	0.00588841	0.00672241	0.00705237	0.00592593	0.00695369	0.0066151	0.00643397	0.00669523	0.00645833	0.00622333	0.0062709	0.00789128	0.00504573	0.00588053	0.00514874	0.00866802	0.0047176	0.00766818	0.00396197	0.00534759	0.00643501	0.00605164	0.00371384	0.00372162	0.00800654	0.00166945	0.00699301	0.00328947	0.0028399	0.00356732	0.00334672	0.00362582	0.00589623		0.00268817
	0.00835189	0.0101466	0.00683787	0.00698603	0.00522648	0.00588428	0.00667476	0.00702165	0.00589931	0.00695217	0.00661347	0.00642921	0.00669394	0.00643483	0.00621118	0.00626959	0.00787402	0.00503235	0.00585729	0.00514851	0.00862689	0.00471698	0.00766541	0.00393391	0.00531561	0.00642824	0.00605013	0.00371287	0.00371195	0.00800356	0.00166945	0.00698568	0.00328793	0.00283867	0.00356234	0.00332728	0.00360144	0.00589023		0.00268817
	0.00834038	0.0101406	0.00683516	0.00698225	0.00522023	0.00587372	0.00665083	0.00699066	0.00589496	0.00692352	0.00660365	0.00639781	0.00668482	0.00642	0.00620907	0.00626679	0.00782998	0.00503129	0.00582524	0.00514139	0.00859522	0.00470925	0.00765697	0.00393288	0.00530839	0.00642774	0.00603217	0.00370308	0.00370995	0.0079464	0.00166945	0.00693756	0.00328205	0.00283721	0.00354505	0.00332331	0.00360088	0.00586701		0.00268817
	0.00832871	0.0101357	0.0068271	0.00697085	0.00521835	0.00586552	0.00664842	0.00698487	0.00588541	0.00692259	0.00660009	0.00636836	0.006684	0.0064071	0.00620438	0.00623402	0.00778787	0.00502392	0.00582488	0.00510093	0.00857237	0.00469	0.00765505	0.00392465	0.00526932	0.00642292	0.00603108	0.00366412	0.00370645	0.00794001	0.00166667	0.00692316	0.00327225	0.00283661	0.00352832	0.00332037	0.00360082	0.00584036		0.0026738
	0.00832819	0.0101198	0.00681348	0.00695807	0.00521588	0.00585849	0.00664266	0.00697162	0.00587504	0.0068836	0.00657126	0.00636067	0.00668151	0.00640097	0.00615098	0.00618087	0.00778745	0.00502293	0.00577529	0.00509684	0.00857169	0.00467635	0.00764007	0.00392377	0.00526316	0.00642202	0.00601328	0.00366041	0.00367937	0.00793356	0.00166113	0.00690846	0.00327216	0.00282801	0.00348432	0.00331482	0.00359982	0.00581395		0.0026738
	0.00832622	0.010081	0.00680272	0.00694963	0.00520698	0.0058442	0.00662395	0.00696258	0.00587372	0.00686262	0.0065658	0.00635625	0.00666465	0.0063745	0.00611162	0.00616927	0.00772472	0.00500109	0.00577478	0.00508044	0.00855246	0.00465611	0.00762674	0.00392238	0.00523697	0.00641026	0.00600817	0.00365764	0.00367918	0.00792171	0.00166113	0.0068929	0.00326501	0.00282124	0.00348068	0.00330356	0.00359874	0.00577906		0.00266667
	0.00832429	0.0100709	0.00678935	0.00693993	0.00520502	0.00582584	0.00659301	0.0069487	0.00582936	0.00684708	0.00656425	0.00634216	0.00665223	0.00636311	0.00610402	0.00615312	0.00771971	0.00496278	0.00575658	0.0050396	0.00854701	0.00465116	0.00762125	0.00390977	0.00522552	0.00640839	0.00595055	0.0036427	0.00364146	0.00787615	0.00165563	0.00687083	0.00326371	0.00281856	0.00347661	0.00329607	0.00358648	0.00576719		0.00266667
	0.00832117	0.0100705	0.00678605	0.00693498	0.00520349	0.00579129	0.00658762	0.00693928	0.00582617	0.0068452	0.00654863	0.00633817	0.00662252	0.0063589	0.00608468	0.00614728	0.00767334	0.0049435	0.00575126	0.00503858	0.00854214	0.00465116	0.0075339	0.00390625	0.00518639	0.00639907	0.00593513	0.00364178	0.00364015	0.00786334	0.00165289	0.0068576	0.00325667	0.00281358	0.00347222	0.00329489	0.00358584	0.00576535		0.00265252
	0.00831354	0.0100594	0.0067757	0.00692771	0.0051963	0.00578662	0.00658617	0.00692042	0.00581621	0.00683112	0.00653595	0.00633553	0.00662154	0.00631964	0.00607577	0.00614112	0.00766392	0.00491489	0.00574926	0.00503578	0.00851991	0.00465116	0.0075332	0.00390456	0.00518327	0.00638261	0.00593233	0.00363901	0.00363857	0.00786222	0.00165017	0.00685358	0.00325309	0.00281162	0.0034617	0.00327368	0.00358423	0.00576083		0.00265252
	0.00829563	0.0100482	0.00677136	0.00691905	0.00519211	0.00578211	0.00656955	0.00691501	0.00580876	0.00682832	0.00652769	0.00632859	0.00661813	0.00629496	0.00606673	0.00608887	0.00764453	0.00490712	0.00573489	0.00503107	0.00851521	0.00464363	0.00752688	0.00390219	0.00517241	0.00636943	0.00591216	0.00363825	0.00363825	0.00786056	0.00164474	0.00685182	0.00324851	0.00281109	0.00345941	0.00326797	0.00358306	0.00574856		0.0026455
	0.00829384	0.0100339	0.00676819	0.0069185	0.00518891	0.00577808	0.00654837	0.0068991	0.00580406	0.00682128	0.00652377	0.00632563	0.00651358	0.00629224	0.0059726	0.00608426	0.00754717	0.00489853	0.00572624	0.00502707	0.00846788	0.00464306	0.00752491	0.00389358	0.00514139	0.00635627	0.00590893	0.00363682	0.00363636	0.0078446	0.00164204	0.00684708	0.00324421	0.00280565	0.00345224	0.00324383	0.00358102	0.00570679		0.0026455
	0.00828937	0.0100242	0.00674467	0.00690989	0.0051624	0.00576769	0.00653266	0.0068918	0.00579934	0.00680504	0.00651466	0.00631626	0.00650817	0.00626538	0.00597069	0.00606919	0.00753532	0.00489639	0.00570885	0.0050219	0.00845865	0.00462504	0.00752194	0.00389312	0.00512214	0.00635551	0.00590429	0.00363636	0.00362694	0.00781708	0.00164204	0.00684211	0.0032419	0.00280416	0.00345187	0.00320917	0.00357831	0.005689		0.00263158
	0.00825959	0.0100191	0.00674394	0.0068929	0.00516111	0.00576602	0.00652697	0.00683112	0.00578871	0.00680211	0.00649185	0.00631393	0.00649351	0.00625195	0.00596783	0.00605245	0.00752284	0.0048846	0.00570694	0.00499744	0.00843882	0.00462012	0.00751611	0.00387597	0.00508871	0.00635231	0.00587795	0.00363495	0.00361446	0.00779143	0.00163666	0.00684031	0.00323898	0.00279416	0.00345115	0.00320807	0.00357557	0.00567959		0.00263158
	0.00824176	0.0100104	0.00673882	0.00688631	0.00515233	0.00576166	0.00651801	0.00682457	0.0057815	0.00679584	0.00648575	0.00630989	0.00648022	0.00624234	0.00596473	0.00603942	0.0075188	0.00487176	0.00569544	0.00499376	0.00843649	0.00461538	0.00744488	0.00387497	0.00508421	0.00633423	0.00587495	0.00363208	0.00361156	0.00778853	0.00163399	0.00681169	0.00323102	0.0027933	0.00342395	0.00319961	0.00356961	0.00567704		0.00261097
	0.00817518	0.00997058	0.00673691	0.0068836	0.00514604	0.00575658	0.00649585	0.00681215	0.00575986	0.00679579	0.00644104	0.00629921	0.00647709	0.00622788	0.00595991	0.00603865	0.00749625	0.00486232	0.00568421	0.00499376	0.0084355	0.00461467	0.00742942	0.00387139	0.00506667	0.00633276	0.00585849	0.00361872	0.00361011	0.0077821	0.00163399	0.00678459	0.00323086	0.0027894	0.00342121	0.00318979	0.00356347	0.00567067		0.00260417
	0.00817308	0.00996873	0.00673653	0.00687942	0.00514339	0.0057512	0.00648749	0.006809	0.00574713	0.00678096	0.00643287	0.00629228	0.00646552	0.00621891	0.00595238	0.00602549	0.00744048	0.00483951	0.00567913	0.00498753	0.00842554	0.00460003	0.00740741	0.003861	0.00503887	0.00629756	0.00584795	0.00359023	0.00361011	0.00776332	0.00163399	0.00675429	0.00322967	0.0027881	0.0034163	0.0031881	0.00355677	0.00566989		0.0025974
	0.00816417	0.00995675	0.00673575	0.00686336	0.0051285	0.00572953	0.00646885	0.00680272	0.00573614	0.00676852	0.0064197	0.00628931	0.00646552	0.00620891	0.00594853	0.00599852	0.00742857	0.00482724	0.00567261	0.00496032	0.00840807	0.00458631	0.00739098	0.00385195	0.0050135	0.00629619	0.00582108	0.00358257	0.0036049	0.00771307	0.00163132	0.00675234	0.00322858	0.00278689	0.00341615	0.00316547	0.00355492	0.00564896		0.0025974
	0.0081424	0.00989357	0.00668271	0.0068577	0.0051247	0.00570843	0.00646659	0.00679292	0.00572477	0.00671446	0.00641167	0.00625301	0.00646142	0.00618836	0.0059419	0.00599294	0.00742804	0.00482625	0.00559076	0.00495272	0.00839904	0.0045849	0.00738804	0.00384986	0.00501139	0.00627156	0.00579151	0.00358182	0.00359712	0.00771208	0.00161812	0.00675047	0.00321768	0.00278242	0.00341549	0.00316225	0.0035489	0.00564175		0.00259067
	0.00813953	0.00989035	0.00665643	0.00685654	0.00510678	0.00570704	0.00646642	0.00676752	0.00572289	0.00670712	0.00638751	0.00624766	0.00644305	0.00618635	0.00590919	0.00598971	0.00742741	0.00482597	0.00556799	0.00494438	0.00837081	0.00458295	0.00736225	0.00383916	0.00500797	0.00626959	0.00577428	0.00358181	0.00359228	0.00770777	0.00161812	0.00674807	0.00321681	0.00277778	0.00340694	0.00315617	0.0035461	0.00563028		0.00259067
	0.00813139	0.00987679	0.00664925	0.00684932	0.00510493	0.0057023	0.00645241	0.00672577	0.00571118	0.00670482	0.0063854	0.00624669	0.00642284	0.0061816	0.00590648	0.00598569	0.00742312	0.00479042	0.00556054	0.00491784	0.00832562	0.00457856	0.00732601	0.00383707	0.005	0.00624025	0.00574823	0.00357034	0.00359023	0.00768919	0.00161812	0.00670125	0.00320793	0.00276425	0.00339476	0.00315555	0.003544	0.00563014		0.00259067
	0.00808766	0.00986972	0.00664781	0.00684932	0.00509601	0.00568311	0.00644238	0.00672102	0.00570125	0.00670347	0.00638051	0.00624462	0.00641279	0.00616814	0.00589536	0.00596421	0.00741586	0.00477707	0.00555387	0.00490829	0.00825524	0.00457666	0.00732218	0.00383368	0.00497512	0.00622191	0.00572852	0.0035687	0.00358938	0.00768087	0.00161812	0.00669833	0.00320468	0.00275957	0.00339397	0.00315259	0.00354191	0.00562072		0.00258398
	0.00807103	0.00985545	0.00663717	0.00683342	0.00509313	0.00567707	0.00644077	0.00671937	0.00569152	0.00669426	0.00637646	0.00623701	0.00641115	0.00616469	0.00587689	0.00596421	0.00740741	0.00477598	0.00555275	0.00490271	0.00824474	0.00457085	0.00732034	0.00383325	0.00496141	0.00621736	0.00571429	0.00352541	0.00358852	0.00767978	0.00161551	0.00669456	0.00320205	0.00275049	0.00339152	0.00315117	0.00353934	0.005613		0.0025641
	0.00807043	0.00984918	0.00661904	0.00681409	0.00508415	0.00567376	0.00643501	0.00670092	0.00568459	0.00667321	0.00636338	0.00621332	0.00640478	0.00614354	0.00586371	0.00595806	0.00740148	0.00477164	0.00554925	0.00488563	0.00823513	0.00456621	0.00727959	0.00379507	0.00494896	0.00621384	0.00571218	0.0035167	0.00358852	0.00767123	0.00161551	0.00669323	0.00318776	0.00274637	0.00338328	0.00315079	0.00353798	0.00560132		0.00255754
	0.00805496	0.00984467	0.00661903	0.00680904	0.00507856	0.00566572	0.00642699	0.00667684	0.00568182	0.00663717	0.00634921	0.00621118	0.00640195	0.00611564	0.00585938	0.00594648	0.00739898	0.00476948	0.00554078	0.00487533	0.00822888	0.00455927	0.00723787	0.00377862	0.00494743	0.00620821	0.00571123	0.00351474	0.00357654	0.00766703	0.0016129	0.00668919	0.00318471	0.00274595	0.00337395	0.00313943	0.00353357	0.00559785		0.00255754
	0.00803428	0.00984221	0.00659739	0.00679992	0.00506248	0.00566009	0.0064114	0.00666499	0.0056643	0.00663411	0.00633888	0.00617862	0.00636384	0.00610376	0.00585938	0.00594019	0.00736196	0.00476116	0.0055367	0.00487277	0.00820419	0.00454545	0.00722892	0.00376523	0.004914	0.00620725	0.00570216	0.00349786	0.00357001	0.00765864	0.00161031	0.0066718	0.00318066	0.00274566	0.00337349	0.00313862	0.00352941	0.00559528		0.00255754
	0.00801887	0.00982234	0.0065872	0.00677736	0.00505732	0.00565635	0.00639907	0.00665834	0.0056624	0.00663285	0.00633752	0.00617602	0.00635497	0.00608273	0.00585737	0.00592398	0.00735971	0.00476071	0.00552666	0.00487238	0.00819239	0.00453662	0.00716499	0.00376034	0.00491215	0.0062004	0.00569878	0.00349536	0.00356888	0.00765538	0.00161031	0.00665933	0.00316286	0.00274474	0.00336984	0.00313669	0.00352467	0.00558179		0.00255754
	0.00801181	0.00977589	0.00658075	0.0067757	0.00505247	0.00565371	0.00639437	0.00665256	0.00565822	0.00662038	0.00631242	0.00617376	0.00634499	0.00607477	0.00584795	0.00589391	0.00735519	0.00473373	0.00552666	0.00486872	0.00819088	0.00452117	0.00714286	0.00375432	0.00488857	0.00619359	0.0056386	0.00349368	0.00356824	0.00765306	0.00160772	0.00665054	0.00316109	0.00274295	0.00336229	0.00313234	0.00352017	0.00558022		0.00255102
	0.00797761	0.00976771	0.00655857	0.0067659	0.0050495	0.00564617	0.00635893	0.00664728	0.00564972	0.0066054	0.00630318	0.00616861	0.00633323	0.00606649	0.00582304	0.00589143	0.00732845	0.00471926	0.00552651	0.00486815	0.00818331	0.00451382	0.00713719	0.00375094	0.004884	0.00619163	0.00563305	0.00349116	0.00356189	0.00763942	0.00160772	0.00662778	0.00315789	0.00272294	0.00335893	0.00312175	0.00352005	0.00556425		0.00255102
	0.00797365	0.00974981	0.00655201	0.00675012	0.00504881	0.00563287	0.0063577	0.0066385	0.0056391	0.00658784	0.00629558	0.00616446	0.00632244	0.00603423	0.00582113	0.00588235	0.00731982	0.00471698	0.00552486	0.00484262	0.00817953	0.00450919	0.00704035	0.00373506	0.00487646	0.00618557	0.00562409	0.00348635	0.00356125	0.00763359	0.00160514	0.00660923	0.00315552	0.00272109	0.00334342	0.00311203	0.00351936	0.00555275		0.00254453
	0.00792127	0.00973345	0.00654555	0.00673286	0.00503971	0.00561214	0.00635549	0.00663674	0.00562852	0.00658762	0.00627917	0.00615574	0.0063184	0.0060241	0.00580271	0.00588235	0.00729927	0.00471698	0.00552321	0.00482073	0.00817388	0.00450284	0.00699301	0.00373134	0.00484818	0.00616953	0.00562004	0.00348481	0.00355398	0.00763359	0.00160256	0.00658044	0.00314762	0.00271463	0.00334076	0.00309981	0.003517	0.00554726		0.00254453
	0.00791396	0.00973178	0.00653504	0.00666364	0.00503813	0.00560573	0.00634633	0.00662818	0.00561622	0.0065723	0.00626249	0.00615511	0.00630915	0.00600775	0.00579374	0.00584368	0.00729167	0.00469631	0.00549618	0.00481762	0.00816549	0.0044856	0.00699059	0.0037192	0.00483927	0.00616755	0.00561368	0.00348389	0.0035503	0.00761474	0.0016	0.00657678	0.00314618	0.00270856	0.00333816	0.00307692	0.00351151	0.0055325		0.00253165
	0.00790639	0.00968326	0.00650943	0.00665557	0.00503597	0.00560559	0.00633134	0.00662351	0.00561612	0.00656927	0.00626043	0.00615258	0.00630631	0.00600659	0.00578035	0.00584226	0.00727618	0.00469145	0.00547945	0.00480373	0.00815087	0.0044843	0.00698045	0.00371021	0.00482759	0.00616095	0.00560673	0.00348311	0.00353774	0.00757712	0.0016	0.00657421	0.00314465	0.00270779	0.00333333	0.00307102	0.00350775	0.00553191		0.00251889
	0.00789391	0.00967167	0.00650536	0.00665273	0.00501587	0.00560132	0.00631712	0.00660851	0.00560024	0.00655022	0.00625183	0.00613139	0.00628889	0.00600378	0.00576621	0.0058393	0.00725851	0.00466838	0.00546963	0.00479838	0.00814111	0.00448359	0.00696111	0.00369276	0.00480492	0.00615676	0.00559018	0.00347308	0.00353357	0.00756859	0.00159744	0.00657094	0.00313901	0.00267991	0.00333008	0.00306937	0.00349803	0.00552933		0.00251889
	0.00787966	0.00965251	0.00650488	0.0066345	0.00501575	0.00559594	0.00631501	0.00658193	0.00559254	0.00653595	0.00623016	0.00612557	0.00627615	0.00599455	0.00576184	0.00580804	0.00720721	0.00466442	0.00546544	0.00477829	0.00811304	0.00448301	0.0069541	0.00368786	0.00479872	0.00613383	0.00557621	0.00346784	0.00353179	0.00756201	0.00159744	0.00654146	0.00313562	0.00267189	0.00332342	0.00304794	0.00347599	0.00551367		0.00250627
	0.00787402	0.00964869	0.00648548	0.00662816	0.0050035	0.00559227	0.00631342	0.00657846	0.00558659	0.00652529	0.00620096	0.00609365	0.00627396	0.00598623	0.0057618	0.00580577	0.00720461	0.00466309	0.00546324	0.00474834	0.00810509	0.00447866	0.00694157	0.00368518	0.00479721	0.00611536	0.00551565	0.00346687	0.00352823	0.00754432	0.0015949	0.00653324	0.00313555	0.0026622	0.00331625	0.00303384	0.00347315	0.0055		0.0025
	0.00786925	0.00963391	0.006469	0.00662252	0.00499366	0.00558713	0.00631277	0.0065658	0.00558252	0.00652277	0.00619435	0.00608071	0.00625419	0.00597943	0.0057443	0.00579878	0.00719424	0.00464396	0.00545663	0.00474666	0.00809281	0.00444586	0.00693374	0.00367767	0.00468165	0.00609244	0.00551371	0.0034655	0.00352645	0.00753546	0.0015949	0.00653168	0.00310734	0.00265471	0.003306	0.00301887	0.0034642	0.0054902		0.00246305
	0.00786449	0.0096082	0.00646418	0.00662132	0.00498008	0.00556642	0.00631164	0.00656129	0.00556745	0.0065083	0.00617284	0.0060701	0.00625	0.00597418	0.00573833	0.00578344	0.0071908	0.00463894	0.00543811	0.00474477	0.00809123	0.00444256	0.00690608	0.00366748	0.00466299	0.00608343	0.00549612	0.00345803	0.00352361	0.00753187	0.0015949	0.00652139	0.00309946	0.00265105	0.00329942	0.00300439	0.00346141	0.00547967		0.00246305
	0.00786112	0.00960583	0.00644884	0.00660981	0.00497856	0.00556391	0.00630835	0.00656105	0.00553742	0.00650671	0.00614667	0.00606372	0.0062273	0.00596057	0.00572345	0.00578035	0.00718276	0.00460666	0.00542005	0.00473934	0.00808229	0.00442359	0.00690052	0.00366532	0.00465839	0.00607428	0.00549129	0.00344531	0.00352113	0.0075188	0.00158983	0.00651466	0.0030989	0.00264924	0.00329761	0.00300172	0.00345489	0.00546946		0.00246305
	0.00783828	0.0096054	0.00644683	0.00660483	0.0049785	0.00554589	0.00628272	0.00652712	0.00553267	0.00650503	0.00614446	0.00605413	0.00622407	0.00595802	0.00572117	0.00577288	0.00716253	0.00458716	0.00539745	0.00473934	0.00805178	0.00441826	0.00688889	0.0036512	0.00464931	0.00607042	0.00548876	0.00343811	0.00351385	0.00750234	0.00158983	0.00647883	0.00309554	0.00263968	0.0032905	0.00299518	0.00344998	0.00545977		0.00246305
	0.00779376	0.00959967	0.00643208	0.00658949	0.00497405	0.00553998	0.00627451	0.00651668	0.00551232	0.00646353	0.00613811	0.00604552	0.00621987	0.00595238	0.00571308	0.00576701	0.00715639	0.00458468	0.00539	0.00473435	0.00803417	0.00441709	0.00688836	0.00364964	0.00464618	0.00602878	0.00546678	0.0034375	0.00351014	0.00749906	0.0015873	0.0064632	0.00309481	0.00262945	0.00328515	0.00298832	0.00344828	0.00545543		0.00246305
	0.00778443	0.00959175	0.00643196	0.00657109	0.00496439	0.00553789	0.0062585	0.00651629	0.00550964	0.00644641	0.00607072	0.0060423	0.00620155	0.00595238	0.00567427	0.00576218	0.00712639	0.00457841	0.00538048	0.00470178	0.00803213	0.00441696	0.00688381	0.00364895	0.00454545	0.00602773	0.00546185	0.00343544	0.0035057	0.0074982	0.00157729	0.00642915	0.00309254	0.0026249	0.00325203	0.00298576	0.00344612	0.00540826		0.002457
	0.00777801	0.0095887	0.00643158	0.00655106	0.00495186	0.00553097	0.00622978	0.00646412	0.00550917	0.00644567	0.00606759	0.00601171	0.00619579	0.00592979	0.00566926	0.0057503	0.00712589	0.00457579	0.00537634	0.00467619	0.00803059	0.00437675	0.00688205	0.00364861	0.00454545	0.00602047	0.00545171	0.00343306	0.00349895	0.00749625	0.0015748	0.00640205	0.00308943	0.00262009	0.00325172	0.00298192	0.00344234	0.00540749		0.00243902
	0.00776433	0.00954693	0.00642828	0.00654758	0.00493857	0.00552792	0.00622978	0.00646067	0.00550647	0.00643752	0.00606395	0.00601159	0.00619408	0.00591547	0.00566377	0.00574222	0.0071048	0.00457317	0.00537291	0.00466153	0.00800801	0.00437202	0.00683371	0.00363196	0.00453782	0.00602014	0.00544959	0.00343088	0.0034904	0.0074573	0.00157233	0.00636183	0.00308474	0.00261324	0.00324465	0.00297806	0.00344037	0.00539811		0.00243605
	0.00774765	0.00953921	0.00641026	0.0065372	0.00493716	0.00552486	0.00621235	0.00645161	0.00550309	0.00643734	0.00604444	0.00596421	0.0061845	0.00590476	0.00565513	0.0057275	0.0070943	0.00456461	0.00536975	0.00463499	0.00800136	0.00437158	0.00681699	0.00362757	0.00448008	0.00599388	0.00544416	0.00341519	0.00348635	0.00745001	0.00156986	0.00634809	0.00308166	0.00260281	0.00322745	0.00297211	0.00343643	0.00538549		0.00243605
	0.00774608	0.00953213	0.00640312	0.00652853	0.00493386	0.0055233	0.00619621	0.00644491	0.0054881	0.00640247	0.00604136	0.00595137	0.00617978	0.00588965	0.00562996	0.00572618	0.0070922	0.00456062	0.00535714	0.00463052	0.00800089	0.00436866	0.00679839	0.00361011	0.00446983	0.00599355	0.00543582	0.00341413	0.00348432	0.00742909	0.00156986	0.00632309	0.00307397	0.00260078	0.00322741	0.00296862	0.00343495	0.00536506		0.00243309
	0.00773794	0.00951662	0.00640079	0.00648243	0.00492905	0.00552038	0.00618353	0.00640604	0.00548082	0.00640205	0.00600643	0.00592718	0.00615782	0.00588235	0.00562475	0.00572246	0.00707108	0.00454989	0.00534079	0.00461931	0.00799225	0.00436681	0.00678733	0.00360721	0.00446263	0.00598444	0.00543565	0.00340788	0.00348211	0.00742421	0.00156986	0.00632149	0.00307314	0.0025992	0.00322407	0.00296296	0.00343228	0.00536193		0.00243309
	0.00771675	0.00951353	0.00639913	0.00645321	0.00491772	0.00552033	0.0061826	0.00640301	0.00547822	0.00638978	0.00600384	0.00591483	0.00614439	0.00587156	0.00560715	0.00572096	0.00705418	0.00453974	0.00529501	0.00460594	0.00798745	0.00436047	0.00678485	0.00360317	0.00442478	0.00598151	0.00541419	0.00339559	0.00347826	0.00740741	0.00156986	0.00630425	0.00305712	0.00259526	0.00321199	0.00296217	0.00341686	0.00535168		0.00243309
	0.00770416	0.00950932	0.00639349	0.00645161	0.00491444	0.00551995	0.00617999	0.00640231	0.00547658	0.00636132	0.00600096	0.00591398	0.00613133	0.00586601	0.00560664	0.00571928	0.00703717	0.00453629	0.00526692	0.00460345	0.00797607	0.00434783	0.0067823	0.00360288	0.00442152	0.00596486	0.00541384	0.00339367	0.00347222	0.00740741	0.00156986	0.00629027	0.0030546	0.00259137	0.00321168	0.00295785	0.0034031	0.00535077		0.00243309
	0.00767918	0.00949875	0.00638907	0.00644468	0.00490638	0.00551204	0.00616831	0.00640186	0.0054755	0.00631334	0.00599431	0.00589496	0.00610501	0.00586185	0.00559832	0.00571792	0.00702811	0.00453172	0.0052553	0.00459632	0.00797	0.00432085	0.00670443	0.00359928	0.00440684	0.0059475	0.00540378	0.00338473	0.00347222	0.00740329	0.0015674	0.00627279	0.00305395	0.00259067	0.00320917	0.00295683	0.00339297	0.00534659		0.00243013
	0.00766651	0.00948412	0.00638193	0.00641069	0.00490377	0.00550358	0.00615114	0.00640079	0.00547246	0.00630361	0.00598361	0.00588235	0.00610231	0.0058534	0.00558659	0.00568958	0.00699301	0.00451535	0.00523157	0.00458847	0.00796152	0.00431607	0.00665078	0.00359712	0.00439422	0.00593692	0.00539726	0.00337458	0.00347222	0.00739372	0.00155763	0.00623384	0.00304105	0.00259067	0.00319898	0.00295381	0.00338983	0.00532481		0.00242131
	0.00760898	0.00946892	0.00635955	0.0063772	0.00489973	0.00549976	0.0061244	0.00638832	0.00546847	0.00629987	0.00598194	0.00588107	0.00609137	0.00583776	0.00557651	0.00563813	0.00698439	0.00450401	0.00522648	0.0045405	0.00794946	0.00431183	0.00664848	0.00359712	0.004329	0.0059312	0.00536073	0.00337397	0.00347222	0.00736377	0.00155763	0.0062251	0.00303644	0.00258621	0.00319744	0.00295372	0.003367	0.00532198		0.00241546
	0.00760746	0.00946508	0.00635838	0.0063762	0.00489739	0.00549218	0.00611888	0.00638468	0.00545094	0.00629467	0.00597666	0.00588005	0.00606649	0.00583212	0.00556224	0.00563474	0.00697425	0.00449594	0.00522514	0.0045403	0.00794498	0.0043113	0.00663995	0.00359631	0.00431965	0.00590624	0.00535699	0.00336474	0.00346981	0.00732917	0.00155763	0.00622034	0.00303521	0.00257909	0.00319178	0.0029383	0.003367	0.00531032		0.00240964
	0.00756121	0.00944981	0.00635531	0.00637281	0.00488938	0.00548145	0.00611529	0.00638153	0.00544285	0.00626447	0.0059761	0.005876	0.00606557	0.0058257	0.00555693	0.00562324	0.00691563	0.0044843	0.00521707	0.00452361	0.00793079	0.00430937	0.00663519	0.00359454	0.00431344	0.00590497	0.00534759	0.00335758	0.00346901	0.00731113	0.0015528	0.00621118	0.00301326	0.00256889	0.00319175	0.00293799	0.00336097	0.00529483		0.00240964
	0.0075431	0.00944113	0.00632911	0.00636634	0.00488747	0.00547196	0.00610073	0.00638006	0.00543267	0.00625273	0.00596659	0.00587484	0.00605965	0.00582309	0.00555015	0.00561798	0.00691122	0.00447094	0.00520261	0.00451583	0.00791113	0.00430416	0.00658296	0.00358252	0.00429185	0.00589242	0.00534581	0.003355	0.00346901	0.00727766	0.0015528	0.00619612	0.00299914	0.0025653	0.00318375	0.00292443	0.0033541	0.00528751		0.00240385
	0.00754006	0.00941704	0.00630716	0.00636492	0.0048842	0.00545129	0.00608905	0.0063593	0.00543072	0.00622961	0.00590593	0.00587017	0.00604961	0.00581145	0.00553557	0.00561693	0.00686275	0.00446872	0.00519694	0.00451333	0.00788342	0.00429799	0.0065703	0.00357542	0.00428024	0.00586101	0.00534255	0.00334572	0.0034642	0.00727273	0.0015456	0.00616483	0.00299895	0.00255015	0.00318237	0.00292032	0.00334743	0.00527157		0.00240385
	0.00753834	0.00934579	0.00629327	0.00636114	0.00488384	0.00543826	0.00608032	0.00635324	0.00537891	0.00621607	0.00588565	0.00586601	0.00603622	0.00580752	0.00553385	0.00561542	0.00685714	0.00445293	0.00519078	0.00451184	0.00787402	0.0042957	0.00655563	0.00356597	0.00427655	0.00584795	0.00533333	0.00334448	0.00346021	0.00726568	0.00153139	0.00614728	0.00299608	0.0025487	0.00318037	0.00291878	0.00334541	0.00524846		0.00239234
	0.0075188	0.00933984	0.00628404	0.00635775	0.004846	0.00543157	0.00607367	0.00633067	0.00536947	0.00621601	0.00587467	0.00585823	0.00602929	0.00580191	0.00550755	0.00560563	0.00679245	0.00444123	0.00519031	0.00447761	0.00786127	0.0042931	0.00655509	0.00356205	0.00424469	0.00583971	0.0053307	0.0033389	0.00345781	0.0072646	0.00153139	0.00614516	0.00298954	0.00254518	0.00317881	0.00291788	0.00334378	0.00524317		0.00239234
	0.00747308	0.0093273	0.00628063	0.00635145	0.00484206	0.00540612	0.00607287	0.00631804	0.00536013	0.00621296	0.00586717	0.00585206	0.0060241	0.0057947	0.0054407	0.00560493	0.00677789	0.00442577	0.00517647	0.00445382	0.00781708	0.00428586	0.00654925	0.00354852	0.00423908	0.00583733	0.00532678	0.00333611	0.00345781	0.00726392	0.00152905	0.006139	0.00298635	0.00253614	0.00317342	0.00291391	0.00334288	0.00522092		0.00239234
	0.00745829	0.00930674	0.00628033	0.00633245	0.00483768	0.00539037	0.00607165	0.00628509	0.00535133	0.00620864	0.00586106	0.00585121	0.00599688	0.00578616	0.00543103	0.0055926	0.00675486	0.00441501	0.00516236	0.00445358	0.00781632	0.00427625	0.0065312	0.0035482	0.0041806	0.00582686	0.00531982	0.00333457	0.00344531	0.00726006	0.00152672	0.00613648	0.00298389	0.00252982	0.00317058	0.00290648	0.0033389	0.00521677		0.00239234
	0.00745371	0.00928427	0.00628033	0.00633198	0.00483279	0.00537886	0.00605426	0.00627854	0.0053432	0.0062069	0.00585667	0.00583516	0.0059817	0.00578035	0.00541826	0.00558517	0.00675169	0.0044058	0.00514874	0.00442098	0.00781424	0.00426929	0.00652351	0.00354024	0.00416934	0.00580475	0.00531915	0.00331065	0.00344432	0.00725402	0.00152672	0.00613269	0.00298329	0.00252343	0.00316382	0.00289561	0.00333726	0.0052161		0.00238663
	0.00743832	0.00928249	0.00625489	0.00632296	0.00483092	0.00537656	0.00605144	0.00625078	0.00531561	0.00620509	0.00584007	0.00582852	0.00597878	0.00577674	0.00540541	0.00557636	0.00670945	0.00439611	0.00514572	0.00441533	0.00780267	0.00426504	0.00652087	0.00353565	0.00411921	0.00579809	0.00531377	0.00330745	0.00344168	0.00725138	0.00152672	0.00611333	0.00296187	0.00251522	0.00316185	0.00289049	0.00332668	0.0052105		0.00238663
	0.00742992	0.00928108	0.00625401	0.00630639	0.00482397	0.00536711	0.00604798	0.00622711	0.00529355	0.00619579	0.00583953	0.00581395	0.00596808	0.00575109	0.00539933	0.0055607	0.0066912	0.0043951	0.00512775	0.00440165	0.00780107	0.00426369	0.00650671	0.00353179	0.00411442	0.00579039	0.00530549	0.0033067	0.00343857	0.00723888	0.00151976	0.00609137	0.00295437	0.00251467	0.00316027	0.00288838	0.00332226	0.00517624		0.00238095
	0.00741046	0.00928074	0.00625	0.00629723	0.00481845	0.00533873	0.00604651	0.00620778	0.00528336	0.00617593	0.00583881	0.00576773	0.00595903	0.00572105	0.00539892	0.00555635	0.00667854	0.00438903	0.00510638	0.00439906	0.00779871	0.0042508	0.00650142	0.0035188	0.00408552	0.00578778	0.00529801	0.00330235	0.00343643	0.00723232	0.00151745	0.00608024	0.00295031	0.00251369	0.00315137	0.00288832	0.00332226	0.00516318		0.00238095
	0.00740588	0.00926962	0.00624853	0.00629685	0.00481078	0.00533333	0.00603992	0.00619515	0.00527409	0.00615457	0.00580137	0.00575397	0.00593916	0.00570587	0.005386	0.00554696	0.00666667	0.00438866	0.0050981	0.00438734	0.00779844	0.00423795	0.00647878	0.00351597	0.00406377	0.00577778	0.00527942	0.00330006	0.00343643	0.00721769	0.00151515	0.0060675	0.00293876	0.00251256	0.00314327	0.00287657	0.00332121	0.0051557		0.00238095
	0.0074043	0.00924779	0.00624301	0.00629319	0.00480615	0.00533032	0.00601504	0.006157	0.00526803	0.00614544	0.00579507	0.00575206	0.00591716	0.00569494	0.00537634	0.0055444	0.00663027	0.00437397	0.00509666	0.0043815	0.00777841	0.00423729	0.00644286	0.00349127	0.00401182	0.00577237	0.00527704	0.0032967	0.00343119	0.00719697	0.00151515	0.00605056	0.00293317	0.00250823	0.0031343	0.00286328	0.0033137	0.00515267		0.00236967
	0.00739666	0.00923411	0.00623571	0.00628607	0.00480538	0.00532959	0.00600601	0.00615294	0.00524934	0.00613798	0.00579445	0.00574398	0.00590406	0.00569185	0.00534147	0.00553506	0.00662252	0.00436999	0.00509138	0.00437828	0.00776288	0.00422284	0.00644122	0.00348384	0.00398759	0.005768	0.00526657	0.00329444	0.00341297	0.0071969	0.00151286	0.00603352	0.00293309	0.0024919	0.00312872	0.00285256	0.00329897	0.0051526		0.00235849
	0.00737667	0.00922722	0.00621118	0.00627803	0.00479019	0.00532052	0.00599829	0.00613101	0.00524912	0.00612191	0.00579414	0.00573559	0.0059036	0.00568891	0.00533049	0.00550943	0.00660066	0.00436681	0.00508906	0.00437828	0.00771819	0.00421496	0.00643016	0.00345304	0.00398199	0.00576738	0.00525368	0.00329128	0.00340619	0.00716675	0.00151057	0.00593912	0.00292498	0.00248051	0.0031258	0.00284458	0.00329128	0.0051469		0.00235849
	0.00736988	0.00922292	0.00620732	0.00627496	0.00478747	0.00528933	0.00598647	0.00611785	0.00524598	0.00608365	0.00578276	0.00573554	0.0058651	0.00568489	0.00530705	0.00550413	0.00658472	0.00436284	0.00507572	0.00437445	0.00771775	0.00420409	0.00636145	0.00344674	0.00398089	0.00576297	0.00524476	0.00328688	0.00340368	0.00716275	0.00151057	0.00591412	0.00291971	0.0024777	0.003125	0.00282422	0.00328515	0.00514236		0.00235294
	0.00736	0.00921006	0.00620178	0.006269	0.00478551	0.00528169	0.00598048	0.00609394	0.00521131	0.00605621	0.00577664	0.00572831	0.00582524	0.00568032	0.00527903	0.00550269	0.00655201	0.00436228	0.0050738	0.00437295	0.00768823	0.00419745	0.00635104	0.00344432	0.00395257	0.00574949	0.00524299	0.00328587	0.00339926	0.00715203	0.0015083	0.00591341	0.0029163	0.0024777	0.00312125	0.00281618	0.00328467	0.00512195		0.00234742
	0.0073501	0.00919981	0.0062004	0.00625978	0.00478469	0.00527155	0.0059803	0.00608544	0.00520833	0.00605449	0.0057669	0.00571992	0.00581818	0.00567408	0.00527164	0.00549479	0.00654879	0.00436105	0.00506897	0.00436787	0.00765697	0.00419111	0.00630915	0.00343643	0.00395101	0.00573649	0.00524269	0.00328138	0.00339751	0.00714711	0.00150376	0.00590763	0.0029098	0.00247729	0.0031185	0.00280554	0.00328064	0.00509091		0.00234192
	0.00734619	0.00919506	0.00618482	0.00625939	0.00477431	0.00525657	0.00597225	0.00606416	0.00520214	0.00605296	0.00574713	0.00571476	0.00579355	0.00566802	0.00526677	0.00548515	0.00652473	0.00434993	0.00506543	0.00435793	0.00764007	0.00418629	0.00627697	0.0034338	0.00393284	0.00570125	0.00524096	0.00327995	0.00337952	0.00714286	0.0015015	0.00590737	0.00290792	0.00247525	0.00310935	0.00280522	0.00327715	0.00507614		0.00233645
	0.00734523	0.00916325	0.00616219	0.00624645	0.00475885	0.00525474	0.00595584	0.00605029	0.00518903	0.00604998	0.00574446	0.00571079	0.00578207	0.00566608	0.00526547	0.00548292	0.00648749	0.00434631	0.00505237	0.0043573	0.0076267	0.0041806	0.00627125	0.00339873	0.00390879	0.005675	0.00523849	0.00327869	0.00336862	0.00712589	0.0015015	0.00590393	0.00290206	0.00247124	0.00310853	0.00279564	0.00327381	0.00507292		0.00233645
	0.0073317	0.00915081	0.00615836	0.00623539	0.0047383	0.00525118	0.00595425	0.00604971	0.00518793	0.00604624	0.00573748	0.00570613	0.00576324	0.00565611	0.00525743	0.00547866	0.00643777	0.00434385	0.00504397	0.00435335	0.00761145	0.00417661	0.00625652	0.00339175	0.00390202	0.00566426	0.00523371	0.00327586	0.00336417	0.00711332	0.00149925	0.00589805	0.00289855	0.00246792	0.00310146	0.00279243	0.00327381	0.00504353		0.00233645
	0.00732138	0.00914149	0.00615285	0.006227	0.00473773	0.00525007	0.00594893	0.00604141	0.00517598	0.00601323	0.00573614	0.00569801	0.00575209	0.00565327	0.00525643	0.00546295	0.00643501	0.00433839	0.00504246	0.00432297	0.00760456	0.00417124	0.00625235	0.00338277	0.00387128	0.00564417	0.00523118	0.00327154	0.00336134	0.00705787	0.00149925	0.00588965	0.00289226	0.00246677	0.00307692	0.00278653	0.00324202	0.00502318		0.002331
	0.00730953	0.00914015	0.00614869	0.00622637	0.00471698	0.00522685	0.00594548	0.00604007	0.00517015	0.00600515	0.00572557	0.00569801	0.00574856	0.00563678	0.00525461	0.00546278	0.00643087	0.00433618	0.00501285	0.00430663	0.00759494	0.00416919	0.00624861	0.00337584	0.00384922	0.00563966	0.00521094	0.00326616	0.0033557	0.00699301	0.00149925	0.00588043	0.00288832	0.00245776	0.00307177	0.00278552	0.00324149	0.00502032		0.00232558
	0.00729927	0.00912921	0.00614754	0.00622294	0.00471527	0.00521739	0.00590775	0.0060252	0.00516699	0.0059952	0.00571247	0.0056908	0.00574713	0.00563622	0.00523968	0.0054512	0.00640652	0.00433526	0.00500663	0.00430385	0.00756564	0.00416009	0.00624688	0.00337579	0.00382836	0.0056338	0.0052	0.00326199	0.00335289	0.00696721	0.00148148	0.00582751	0.00288345	0.0024564	0.00306748	0.00278552	0.00324149	0.00502019		0.00232019
	0.00726317	0.00911023	0.00614525	0.00621951	0.0047138	0.00521286	0.0058684	0.0060228	0.00516018	0.00599384	0.00568586	0.00567813	0.00572578	0.00562823	0.00521453	0.00545103	0.00636717	0.00433189	0.00500357	0.00429646	0.00752673	0.00415468	0.00621586	0.00337527	0.00379834	0.0056243	0.00518573	0.00326131	0.00334821	0.00696056	0.00147059	0.00582615	0.00288184	0.00245558	0.0030648	0.00278373	0.00324101	0.00499449		0.00232019
	0.00726104	0.0091029	0.00613365	0.00621547	0.00471344	0.00519018	0.00585223	0.0060184	0.00515464	0.00597984	0.00565213	0.00567508	0.00571003	0.00561973	0.0051899	0.00543404	0.0063567	0.00431881	0.005	0.00428028	0.00751417	0.00414034	0.00621547	0.00337268	0.00379713	0.00559419	0.00517866	0.00324723	0.00334672	0.00695652	0.00147059	0.00580016	0.00288034	0.00245413	0.00305914	0.00278309	0.00323625	0.00497636		0.00232019
	0.00726099	0.00910273	0.00613246	0.0062122	0.00471024	0.00518903	0.00583864	0.00601202	0.00514651	0.00595023	0.00564392	0.00567465	0.00570846	0.00558892	0.0051886	0.00541455	0.00634371	0.00430491	0.00499562	0.00426608	0.0075	0.00413403	0.00621118	0.00337079	0.00378251	0.00558971	0.00516506	0.00324625	0.00334225	0.00693802	0.00146843	0.00578095	0.00287839	0.00245371	0.0030546	0.00278209	0.00323251	0.00496729		0.00231481
	0.00725244	0.0091001	0.00613208	0.00619408	0.00469343	0.00517438	0.00582972	0.00600269	0.00514214	0.00591356	0.00561931	0.00566465	0.00569853	0.0055768	0.00517142	0.00540564	0.00629047	0.00430309	0.00498523	0.00424929	0.00748503	0.00412326	0.0062003	0.00336538	0.00377715	0.00557828	0.00515132	0.00323625	0.00331181	0.00692428	0.0014556	0.00576008	0.00287522	0.00245158	0.00305057	0.00277778	0.00323044	0.00495868		0.00231481
	0.00725163	0.00909447	0.00612388	0.0061775	0.004662	0.00516235	0.00582411	0.00598884	0.00512511	0.00589598	0.00559986	0.00566465	0.00565598	0.00557177	0.00516717	0.00540249	0.00627615	0.00430299	0.00498132	0.00423012	0.00747556	0.0041173	0.00619135	0.00334896	0.00377675	0.00557276	0.00514602	0.00323501	0.00331126	0.00689223	0.00144509	0.00574241	0.00286996	0.00244778	0.00304745	0.00276962	0.00322165	0.00494493		0.00231481
	0.00722892	0.00908638	0.00610264	0.00616733	0.00465519	0.00515959	0.0058203	0.00597383	0.00511945	0.00588913	0.00556745	0.00563075	0.0056411	0.00555285	0.00516382	0.00539534	0.0062724	0.00429823	0.00497925	0.00418118	0.00741579	0.00410641	0.00617761	0.00334608	0.00377644	0.00555556	0.00514196	0.00322655	0.00330961	0.00687666	0.00142857	0.00571541	0.00286971	0.00243994	0.00304443	0.00276831	0.00321987	0.00493778		0.00230947
	0.00722311	0.00907741	0.00608167	0.00616483	0.00465116	0.00514801	0.00580672	0.00594553	0.00509904	0.00588701	0.00555761	0.00562293	0.00563777	0.00553181	0.00516016	0.00538044	0.00625978	0.00427731	0.00497165	0.00417624	0.00740741	0.00409981	0.0061665	0.00333095	0.00368646	0.0055535	0.00513761	0.00320239	0.00330852	0.00686342	0.0014245	0.00569044	0.00286889	0.00243736	0.00303235	0.00276753	0.00321839	0.00493139		0.00230947
	0.00720052	0.00907686	0.00608	0.00615901	0.00464996	0.00514527	0.0057971	0.00594389	0.00508373	0.00587595	0.00555378	0.00560586	0.00563698	0.00552427	0.00515102	0.00537514	0.0062569	0.00427704	0.00494583	0.00416146	0.00739484	0.00409912	0.00616333	0.00332226	0.00367709	0.00551978	0.00512967	0.0032	0.00330797	0.00683995	0.00141643	0.00568182	0.0028648	0.00243655	0.00303197	0.00276391	0.00321337	0.00492005		0.00230947
	0.00719209	0.00905124	0.0060795	0.00615886	0.00464037	0.00513875	0.00579131	0.00593032	0.00506586	0.0058699	0.0055336	0.00559552	0.0056338	0.00551111	0.00514964	0.00537313	0.00625	0.00426621	0.00492924	0.00414594	0.00738422	0.00409903	0.006157	0.00332052	0.00367069	0.00551044	0.00512575	0.00319811	0.00329308	0.00682261	0.00141643	0.00567721	0.00285225	0.00243216	0.00302801	0.00275699	0.00321285	0.00491832		0.00230947
	0.0071885	0.00903862	0.00606497	0.00615764	0.00463465	0.00513818	0.00575314	0.00593022	0.00505561	0.00584795	0.00552923	0.00558935	0.0055966	0.00550141	0.00514801	0.00533808	0.006244	0.00425532	0.00492117	0.00414145	0.00737837	0.00408971	0.00611434	0.00331065	0.00366823	0.00550964	0.00512267	0.00319625	0.00328638	0.00680052	0.00141243	0.00566733	0.0028472	0.00241922	0.00302176	0.00275482	0.00321175	0.0049162		0.00230415
	0.0071741	0.00902527	0.00601344	0.00613608	0.00463445	0.00512821	0.00574713	0.00588235	0.0050521	0.00583171	0.00552897	0.0055768	0.00556483	0.00549863	0.00514002	0.00532965	0.00624164	0.00425532	0.00492087	0.00413266	0.00735033	0.00407886	0.006095	0.00330735	0.00365906	0.00549753	0.00511469	0.00319609	0.00328407	0.00679139	0.00141243	0.00565897	0.0028404	0.00241796	0.00301899	0.00274725	0.0032113	0.0048429		0.00230415
	0.00716418	0.00899635	0.00601116	0.00613254	0.00462781	0.00511467	0.00574438	0.00588127	0.00501882	0.00583049	0.00551369	0.00557441	0.00555737	0.00545331	0.00512967	0.0053286	0.00623701	0.00425341	0.00492005	0.00411184	0.00735024	0.00405704	0.00609319	0.00330469	0.0036471	0.00548589	0.00511142	0.00319234	0.00328228	0.0067791	0.00140056	0.00565562	0.0028342	0.00241493	0.00300464	0.00274725	0.00320342	0.00483715		0.00229885
	0.00716309	0.00899594	0.00600711	0.00611888	0.00462687	0.00511172	0.00573966	0.00587851	0.00499256	0.00582488	0.00551251	0.00555859	0.00555718	0.00543955	0.00512089	0.00532777	0.00623701	0.00424628	0.00491803	0.00408889	0.00733945	0.00402777	0.00608596	0.00330442	0.00364264	0.00547739	0.00508582	0.00318828	0.00327735	0.00674789	0.00140056	0.00563733	0.00283286	0.00241463	0.00300382	0.00274223	0.00319758	0.0048353		0.00229885
	0.00715529	0.00898811	0.00600284	0.00611227	0.00460299	0.00510894	0.00570288	0.00587515	0.00498713	0.00582109	0.00550206	0.00555298	0.00554697	0.00543652	0.00510868	0.00532623	0.00621946	0.00423057	0.004905	0.00408548	0.00733176	0.00400802	0.00603935	0.00329698	0.00363306	0.00547645	0.00508056	0.00318789	0.00326036	0.00674494	0.00140056	0.00563449	0.00283046	0.00240964	0.0030037	0.00273973	0.00319026	0.00483314		0.00229885
	0.00715283	0.00898172	0.00598922	0.00610763	0.00459952	0.00510458	0.00570091	0.00586941	0.00498181	0.005821	0.00549567	0.00553885	0.00554213	0.00542005	0.00510856	0.00531752	0.00621118	0.00421644	0.00489702	0.0040842	0.00732184	0.00400627	0.00603839	0.00329266	0.00361714	0.00546822	0.00503983	0.00317483	0.003256	0.00674082	0.00139276	0.00560448	0.00282087	0.00240779	0.00299767	0.00272446	0.00318471	0.00482648		0.00229885
	0.00712589	0.00894569	0.00597796	0.00610155	0.00459176	0.00507412	0.00568105	0.00586572	0.00497405	0.0058156	0.00547046	0.00552835	0.00553809	0.00541638	0.00509639	0.00531622	0.00621118	0.00421467	0.00487391	0.00408163	0.00729386	0.00399467	0.00603248	0.00328767	0.0036157	0.00546516	0.00503701	0.0031746	0.00325027	0.00673684	0.00137931	0.0055871	0.00281745	0.00240732	0.00299312	0.00271862	0.00318228	0.00481058		0.00229885
	0.00712128	0.0088968	0.0059676	0.00609101	0.00459171	0.00507246	0.00565225	0.00586081	0.00493891	0.00581395	0.00546635	0.00551572	0.00553606	0.00541516	0.00509214	0.00530973	0.00620997	0.0042101	0.00487211	0.00408065	0.00727543	0.00398804	0.00602623	0.00328745	0.00359971	0.00546358	0.00503416	0.00316979	0.00324149	0.00671012	0.00137552	0.00558559	0.00281268	0.00240227	0.00298954	0.00271493	0.00317404	0.00480059		0.00229358
	0.00711322	0.00888008	0.00595238	0.00608477	0.00458657	0.00505051	0.00565208	0.00585594	0.00493608	0.00578035	0.00545773	0.00551572	0.00552677	0.00540541	0.0050721	0.00530421	0.00620843	0.00420698	0.00484957	0.00408018	0.00723764	0.00397318	0.00601052	0.00328502	0.00358012	0.005455	0.00502024	0.00316494	0.00324149	0.00669585	0.00137174	0.00558444	0.00280987	0.00239923	0.00298645	0.00271186	0.00316456	0.00476057		0.00229358
	0.00710606	0.00884467	0.00594648	0.00607407	0.00457624	0.00504541	0.00564236	0.00585093	0.00493373	0.00577778	0.005442	0.00551168	0.00552161	0.00539687	0.00506329	0.00529729	0.00620636	0.00420334	0.0048316	0.00407407	0.00722335	0.00393912	0.00601052	0.00327869	0.0035561	0.00545207	0.00501716	0.003156	0.00323887	0.00665115	0.00137174	0.00551788	0.00280974	0.00239844	0.00298319	0.00271108	0.00316122	0.00475543		0.00228833
	0.0070997	0.00884238	0.00592002	0.00607134	0.00457558	0.00504087	0.00564002	0.00582319	0.00493265	0.00577617	0.00543675	0.00550565	0.00551948	0.00536803	0.00503256	0.00527768	0.00618921	0.00420294	0.00482648	0.00407296	0.00719947	0.00391791	0.00601002	0.00326264	0.00354296	0.00542495	0.00500751	0.00314054	0.00323799	0.00664282	0.00136612	0.00551645	0.00280724	0.0023948	0.00298137	0.00270942	0.0031582	0.00475494		0.00228311
	0.00706772	0.00883806	0.00588978	0.00607112	0.00457358	0.00503876	0.00562997	0.00582043	0.00492542	0.00576784	0.00543015	0.0054902	0.00550375	0.00535475	0.00502308	0.00527704	0.00617602	0.00419698	0.00482537	0.00406927	0.00719424	0.00389982	0.00597015	0.00326087	0.00352661	0.00541752	0.00500331	0.00313725	0.00323625	0.00663806	0.0013624	0.00551378	0.0027975	0.00239425	0.00297418	0.00270578	0.00315742	0.00474814		0.0022779
	0.00706238	0.00883376	0.005886	0.00606735	0.0045577	0.0050362	0.00562918	0.00580241	0.00491469	0.00576277	0.00542478	0.00548321	0.00548804	0.00534964	0.00500116	0.00526701	0.0061753	0.0041868	0.00481058	0.00406622	0.0071858	0.00389294	0.00596303	0.00325145	0.00350467	0.00540757	0.00497904	0.00313603	0.00322581	0.00661241	0.0013624	0.00550738	0.00278552	0.00238237	0.00296809	0.0027047	0.00315292	0.00474453		0.0022779
	0.00705442	0.00881927	0.00587406	0.00606703	0.00455672	0.00502513	0.0055905	0.00580119	0.00490393	0.0057391	0.00540857	0.0054716	0.00547778	0.00534003	0.0049895	0.0052597	0.00617496	0.00417569	0.00480662	0.00405954	0.00718378	0.0038926	0.0059546	0.00325081	0.00347151	0.00539265	0.0049765	0.0031348	0.00321932	0.0065991	0.0013587	0.00550206	0.00277956	0.00237906	0.0029654	0.00269703	0.00315209	0.00474233		0.00227273
	0.00704323	0.00879416	0.00586344	0.00605977	0.00454395	0.00500334	0.00558197	0.0057971	0.00490388	0.00573614	0.00540754	0.00544856	0.00547695	0.00533537	0.00498732	0.0052482	0.00615901	0.00416667	0.00474737	0.00405074	0.00718133	0.00386627	0.00594828	0.00325042	0.00345006	0.00539245	0.00494951	0.00313152	0.00321839	0.00657109	0.00135501	0.00550156	0.00277864	0.002376	0.00296366	0.00269542	0.00314324	0.00469361		0.00227015
	0.00703164	0.00877627	0.00583942	0.00605727	0.00454394	0.005001	0.00558003	0.00576369	0.00488472	0.00572716	0.00540605	0.00544578	0.00546766	0.00533333	0.00497512	0.00523122	0.00614754	0.00416089	0.00472134	0.00404157	0.00714286	0.00385802	0.00594245	0.00324588	0.00342717	0.00538503	0.00494861	0.00312989	0.0032175	0.00656276	0.00134771	0.00546661	0.00277835	0.00236967	0.0029625	0.00268942	0.00314212	0.00468933		0.00227015
	0.00702302	0.00877528	0.00581395	0.00604595	0.00454243	0.00498426	0.00556816	0.00573927	0.00487715	0.0057268	0.00540541	0.00541261	0.00546756	0.00532822	0.00497512	0.00522235	0.00607129	0.00414365	0.00470626	0.00403769	0.00713267	0.00385688	0.0059399	0.00323129	0.00340452	0.00538462	0.00494717	0.00312862	0.00321658	0.00654613	0.0013459	0.00545188	0.00277427	0.00236431	0.0029606	0.0026824	0.00314042	0.00468465		0.00226757
	0.00701694	0.00874879	0.00581283	0.00603813	0.0045345	0.00497953	0.00556715	0.0057373	0.00486722	0.00571895	0.00537956	0.00539957	0.00546569	0.00532569	0.00496894	0.00522193	0.00606411	0.00413155	0.00468762	0.0040282	0.00710148	0.00385299	0.00590641	0.00322971	0.00339943	0.00537634	0.00494438	0.00312323	0.00321543	0.0065329	0.0013459	0.00541633	0.00277332	0.00235373	0.00295549	0.00268148	0.00314001	0.00466527		0.00225734
	0.00701531	0.0086879	0.00580876	0.00603809	0.00452423	0.00497838	0.00556328	0.00573144	0.0048651	0.00570927	0.00536193	0.00538738	0.00546139	0.00532454	0.00495458	0.00520532	0.00605571	0.00412416	0.00468549	0.00401999	0.00709648	0.00384962	0.00589449	0.00321678	0.00339926	0.00536193	0.00494037	0.00311931	0.00320793	0.00652742	0.00134409	0.00541049	0.002772	0.00235097	0.00295031	0.00267762	0.00313972	0.00465018		0.00225225
	0.00701224	0.00868604	0.00580833	0.00602498	0.00452226	0.00497037	0.00556065	0.0057041	0.00485664	0.00570776	0.00536152	0.00537791	0.00543291	0.0053179	0.00495356	0.00519967	0.00605536	0.00412229	0.00468262	0.00401812	0.00707547	0.00383142	0.00589044	0.00320924	0.00337662	0.00536043	0.00493135	0.00311249	0.00320641	0.00652073	0.00133333	0.00540541	0.00276686	0.00235034	0.00294472	0.0026753	0.00313837	0.00464989		0.00224215
	0.00700792	0.00868486	0.00580696	0.00602237	0.00450837	0.00496956	0.0055336	0.0056931	0.00485296	0.00569395	0.00535578	0.00537514	0.00543138	0.00531328	0.00492126	0.00519673	0.00603865	0.00411969	0.00465941	0.00400501	0.00707351	0.00382987	0.00586688	0.00320671	0.00337079	0.0053526	0.00492735	0.00310988	0.00320256	0.00650842	0.00131579	0.00540457	0.00276434	0.00234355	0.00294284	0.0026738	0.00313583	0.00464072		0.00223714
	0.00700565	0.00867618	0.00578964	0.00601625	0.00450644	0.00494053	0.00552808	0.00568413	0.00485153	0.00569106	0.00534302	0.00535972	0.00542665	0.00531184	0.00491782	0.00519481	0.006004	0.00411689	0.00464157	0.00400168	0.00706578	0.00382123	0.00583658	0.00320475	0.00334946	0.0053491	0.00492376	0.00310835	0.00320102	0.00649562	0.00131406	0.00539745	0.00275699	0.00233952	0.00294072	0.00266845	0.00313569	0.00461894		0.00222222
	0.00698273	0.00866959	0.00578524	0.00600761	0.00450093	0.00493523	0.00552391	0.00564972	0.00484653	0.00567734	0.00533138	0.00535154	0.00539024	0.00529101	0.00490593	0.00518848	0.00600365	0.00410818	0.00463485	0.00399122	0.00705187	0.00380807	0.00581666	0.00320088	0.00334928	0.00534464	0.00492193	0.00310734	0.00320039	0.00649491	0.00131062	0.00538117	0.00274564	0.00233827	0.00293902	0.00266667	0.00312826	0.00459653		0.00221729
	0.00698016	0.00863724	0.00575658	0.00599867	0.0045007	0.00493097	0.0055205	0.00564638	0.00484027	0.00566974	0.0053037	0.00534166	0.00538424	0.00528388	0.00489263	0.00518836	0.00598477	0.00410418	0.00460187	0.00398551	0.00704225	0.003803	0.00581578	0.00319829	0.00329743	0.00531773	0.00491803	0.00310263	0.00319744	0.00648405	0.00130548	0.00536506	0.00274128	0.00232198	0.00293559	0.0026643	0.00312234	0.00459252		0.00221239
	0.00697504	0.00863405	0.00573845	0.0059968	0.00449337	0.00492533	0.00550875	0.00563698	0.00482595	0.00564118	0.00528563	0.00533204	0.00538141	0.00526904	0.00487409	0.00517583	0.00598404	0.00410023	0.00457049	0.00397878	0.00704225	0.00380228	0.0058126	0.00318979	0.00329281	0.00529993	0.00491008	0.00310198	0.00318471	0.00647829	0.00130378	0.00533584	0.00274098	0.00231942	0.00293356	0.00266036	0.00311943	0.00457433		0.00221239
	0.00696721	0.00861551	0.00572561	0.0059902	0.00448263	0.00492283	0.00550851	0.00562781	0.00481822	0.00563204	0.00527295	0.00532421	0.00538135	0.00525739	0.0048677	0.00517241	0.00593912	0.00409836	0.00456251	0.00396825	0.007035	0.00380102	0.0057554	0.0031881	0.00329179	0.00529004	0.00490408	0.00308778	0.00317797	0.00646372	0.00130378	0.00530705	0.00273473	0.00231564	0.00292276	0.00265876	0.00311915	0.00456128		0.00221239
	0.00695787	0.00859687	0.00571973	0.00596224	0.00448121	0.00489396	0.00550398	0.00561752	0.00480769	0.00561924	0.00521999	0.00531915	0.00537678	0.00523462	0.00485009	0.00516717	0.00592242	0.00409207	0.00456204	0.0039604	0.0070286	0.00379634	0.00573671	0.0031881	0.00328299	0.00528751	0.00489929	0.00308702	0.00317348	0.00646273	0.00130208	0.00527341	0.00273224	0.00231104	0.00290928	0.00265565	0.00309598	0.00456012		0.00219298
	0.0069541	0.00857007	0.00570652	0.00596222	0.00447984	0.00487559	0.00550299	0.00561632	0.00480379	0.00561798	0.00519181	0.0053135	0.00535794	0.00523116	0.00484932	0.00516488	0.00589777	0.00408534	0.00454971	0.00395629	0.00700584	0.00379632	0.00569801	0.00317397	0.00325351	0.00527451	0.0048909	0.00308642	0.00316456	0.00645856	0.00130208	0.00525879	0.00272937	0.00230747	0.00290385	0.00265408	0.00308902	0.00454727		0.00219298
	0.00695322	0.00856011	0.00569801	0.00594664	0.00447689	0.0048726	0.00550055	0.00560852	0.00480291	0.00561634	0.00518819	0.0052897	0.00533412	0.00522973	0.00482917	0.00516061	0.00589391	0.00407793	0.00452069	0.00395257	0.00694444	0.0037828	0.00565611	0.00317395	0.00323712	0.00526547	0.00488722	0.00308325	0.00316256	0.00644567	0.00130039	0.00524836	0.002727	0.00230578	0.00290149	0.00265076	0.00308553	0.00453386		0.00219298
	0.00694303	0.00853769	0.0056899	0.00594586	0.00447678	0.00486197	0.0054976	0.00560224	0.0047968	0.00559894	0.00517624	0.00528559	0.00532077	0.00522632	0.00482668	0.00515413	0.00588452	0.00406846	0.00450301	0.00393887	0.00693241	0.00377953	0.0056273	0.00317029	0.00323206	0.00526143	0.00488032	0.00308261	0.00315457	0.00638468	0.00130039	0.00523865	0.0027248	0.00230415	0.00289855	0.00264725	0.00308166	0.00451977		0.00218818
	0.00692754	0.00852736	0.00567003	0.00594585	0.00446856	0.00485285	0.0054916	0.00559284	0.00476658	0.00559552	0.00517104	0.00528443	0.00531915	0.00522388	0.00482057	0.00515251	0.00586207	0.00406688	0.00449102	0.00393241	0.0069192	0.00377188	0.00562701	0.0031679	0.00322301	0.0052599	0.00487659	0.00307012	0.00315209	0.00638174	0.00130039	0.00523311	0.00272298	0.00229245	0.00289855	0.00264725	0.00307692	0.00451759		0.00218818
	0.00690783	0.00850689	0.00566171	0.00592844	0.00446761	0.00485069	0.00549057	0.0055915	0.0047619	0.00554871	0.00515002	0.00527565	0.00531444	0.00522042	0.00481298	0.00514139	0.0058434	0.00406654	0.00447778	0.00393005	0.00689146	0.00376864	0.00562249	0.00315457	0.003193	0.0052531	0.00486641	0.00306931	0.00315173	0.00637755	0.0012987	0.00521173	0.00271871	0.00228624	0.00289307	0.00263648	0.00307692	0.00451703		0.00217391
	0.00687715	0.00849346	0.00565986	0.00592326	0.00446372	0.00484602	0.0054816	0.00557468	0.00475757	0.00553825	0.00514981	0.00527241	0.00530928	0.00521221	0.00481134	0.00513287	0.00584307	0.00405728	0.00447184	0.00392394	0.00686656	0.00376737	0.00561964	0.00314861	0.00316018	0.00524142	0.0048628	0.00306748	0.0031506	0.00636456	0.00129534	0.00521135	0.00270514	0.00228278	0.0028715	0.00263493	0.0030722	0.00449974		0.0021692
	0.00686642	0.00848523	0.00565657	0.0059219	0.00445157	0.00482527	0.00548112	0.00557006	0.00472641	0.00553646	0.00514328	0.00527224	0.00530875	0.00519319	0.00476271	0.00513008	0.00582936	0.00404858	0.00446429	0.00392157	0.00686575	0.0037639	0.0056101	0.00314356	0.003156	0.00522938	0.00485535	0.00306251	0.00313603	0.00635786	0.00129032	0.00519012	0.00270514	0.00227746	0.00286926	0.00263447	0.00306821	0.00448907		0.0021645
	0.00685835	0.00847888	0.00564507	0.00591716	0.0044511	0.00481618	0.00546587	0.0055684	0.00467743	0.00553291	0.00513347	0.00526785	0.00529834	0.00518276	0.0047599	0.0051254	0.00582751	0.00403769	0.00440974	0.00391815	0.00686561	0.00376261	0.00558065	0.0031362	0.00314663	0.00522846	0.00484848	0.00306122	0.00313234	0.00633714	0.00129032	0.00517655	0.00269713	0.00227704	0.00286856	0.00262123	0.00306435	0.00448833		0.0021645
	0.00685401	0.00847555	0.00564153	0.0059098	0.00443656	0.00480017	0.00545635	0.00555679	0.00467622	0.00552105	0.00512607	0.0052485	0.00529738	0.00518135	0.00475403	0.00512184	0.00581594	0.00399447	0.00439453	0.00391338	0.0068626	0.0037594	0.00555589	0.0031264	0.00314136	0.00520878	0.00483233	0.00305236	0.00312989	0.00632262	0.00128866	0.0051458	0.00269397	0.00227052	0.00285987	0.00262074	0.00306321	0.0044817		0.0021645
	0.00685234	0.00847016	0.00563413	0.00589181	0.00443131	0.00479659	0.0054515	0.00555556	0.00467344	0.00551978	0.00510949	0.00523967	0.00526816	0.00518135	0.00475007	0.0051188	0.00580271	0.00399361	0.00438875	0.00387847	0.00685602	0.0037451	0.00554675	0.00311818	0.0031348	0.0052064	0.00483092	0.00304801	0.00312134	0.00631712	0.00128535	0.00513149	0.00268097	0.00226629	0.002849	0.00260417	0.00305603	0.00446701		0.00215983
	0.00684751	0.00846051	0.00562359	0.00588847	0.0044164	0.00479551	0.00544888	0.00554882	0.0046729	0.00551741	0.00510297	0.00523732	0.00523641	0.00517895	0.00472144	0.00511789	0.0057971	0.0039889	0.00438169	0.00386681	0.00684647	0.00374367	0.00554477	0.00311804	0.00312462	0.00519481	0.00481726	0.00304595	0.00311405	0.00630223	0.00128205	0.00512349	0.00267977	0.0022593	0.00283976	0.00260134	0.00305292	0.00446372		0.00215983
	0.00684524	0.00844467	0.00562324	0.0058873	0.00441306	0.00479233	0.00542986	0.00552853	0.00465453	0.00551471	0.00509574	0.00522134	0.00521244	0.00517369	0.00470181	0.00510762	0.00578991	0.00396539	0.0043719	0.00386548	0.00684211	0.00373998	0.00548533	0.00311042	0.00311388	0.00519121	0.00480236	0.00304445	0.00311203	0.00628059	0.00128205	0.0051137	0.00266863	0.00225644	0.00283715	0.00259965	0.00304728	0.00440775		0.00214133
	0.00684017	0.00844291	0.00561993	0.00587248	0.00440321	0.00479042	0.00542969	0.00550923	0.0046524	0.00550285	0.00508351	0.00518842	0.00520919	0.00514763	0.00470181	0.00510117	0.00576037	0.0039632	0.00436627	0.00385195	0.00683995	0.00373874	0.00543242	0.00310479	0.00311139	0.00519095	0.00480096	0.00303145	0.00310559	0.00627353	0.00127877	0.00510067	0.00265957	0.00225091	0.00283428	0.00259943	0.00304165	0.00438799		0.00214133
	0.00683636	0.00844156	0.00557034	0.00586756	0.00440113	0.00477859	0.00542665	0.00549753	0.00464622	0.00550133	0.00508232	0.00518836	0.00520833	0.00514657	0.00468883	0.00508593	0.00574713	0.0039627	0.0043611	0.00384944	0.00683544	0.00373208	0.00542527	0.00310009	0.00308422	0.00516796	0.00479724	0.00302419	0.00310559	0.00627027	0.00127877	0.00509944	0.00265759	0.00224719	0.0028222	0.00259909	0.0030326	0.00438139		0.0021322
	0.00683082	0.00842718	0.00555208	0.00586562	0.00438963	0.00477555	0.00541796	0.00549618	0.00464063	0.00548948	0.00506205	0.00517837	0.0052074	0.00513034	0.00468823	0.00508475	0.00573066	0.00396127	0.00432246	0.00383058	0.00682594	0.0037192	0.00540757	0.00309885	0.00304878	0.00516382	0.00478796	0.00302406	0.00310438	0.00625952	0.00127714	0.00508318	0.00265663	0.00224578	0.00282087	0.0025974	0.00302115	0.00437355		0.0021322
	0.00681818	0.00842496	0.00554649	0.00585049	0.0043865	0.00477555	0.00541796	0.00548005	0.00461894	0.00548948	0.00503903	0.00517638	0.00520404	0.00511732	0.00468384	0.00508065	0.00573066	0.00395298	0.00432126	0.00382995	0.0068014	0.00370528	0.00539568	0.00309239	0.0030462	0.00516074	0.00476569	0.00301932	0.00309324	0.00625614	0.00125786	0.00508259	0.00265299	0.00224571	0.00281889	0.00259628	0.00301811	0.00436121		0.00212766
	0.00680967	0.00836902	0.00554324	0.00584368	0.00438596	0.00476139	0.00541638	0.00547676	0.00461894	0.00547945	0.00502819	0.00516224	0.00519031	0.0051161	0.00468019	0.00508001	0.00572246	0.00394491	0.00431998	0.00380383	0.00679383	0.00369588	0.00539511	0.0030896	0.00302998	0.00516014	0.00475315	0.00301912	0.00309119	0.00625411	0.00125628	0.00506236	0.00264857	0.00224067	0.00281877	0.00259151	0.00301248	0.00434611		0.00212615
	0.00679887	0.00836725	0.00553809	0.00584015	0.00438276	0.00475274	0.00540541	0.00546507	0.00459524	0.00546533	0.00501421	0.00515983	0.00517241	0.00510794	0.0046729	0.00506792	0.00571429	0.00394109	0.00430858	0.0038036	0.00679159	0.00368789	0.00537746	0.00308721	0.00302607	0.00515996	0.00474383	0.00301841	0.00308833	0.00625279	0.00125471	0.00504826	0.00264805	0.00223422	0.00281413	0.00258732	0.00300958	0.00434211		0.00212314
	0.0067868	0.00836286	0.00552486	0.00583976	0.00436644	0.00475142	0.00538876	0.00546011	0.0045781	0.00545517	0.00501346	0.00515233	0.00517178	0.00508044	0.00465373	0.00505702	0.00569801	0.00393666	0.00429975	0.00378975	0.00678887	0.00367972	0.00533088	0.00308382	0.00300526	0.0051573	0.00473464	0.00300711	0.00308234	0.00623219	0.00125313	0.00502306	0.00264201	0.00222717	0.00280456	0.00258565	0.00300752	0.00433839		0.0021097
	0.00678426	0.00835764	0.00550122	0.00583869	0.00436383	0.0047433	0.00537924	0.00545934	0.00455927	0.0054417	0.00499546	0.00514482	0.00515788	0.00505817	0.00464576	0.0050435	0.00569044	0.00391901	0.00429526	0.00378182	0.0067626	0.00366844	0.00532956	0.00307892	0.003003	0.00512033	0.00473293	0.00300401	0.00308057	0.00620651	0.00124533	0.0050223	0.00263902	0.00222374	0.00280426	0.00257658	0.003002	0.00433571		0.00210526
	0.00677966	0.00832855	0.0054872	0.0058363	0.00435308	0.00473934	0.00536673	0.00544016	0.00455526	0.00543729	0.00499457	0.00513225	0.00515604	0.00504202	0.00462963	0.00504237	0.0056872	0.00391304	0.00426076	0.00377834	0.00676203	0.00366636	0.00531915	0.00306044	0.00295556	0.00511758	0.00473023	0.0030036	0.00307692	0.00618921	0.00124378	0.00501817	0.00263574	0.00221957	0.0027972	0.00256201	0.00299551	0.00432277		0.00210084
	0.00676819	0.00831861	0.00548005	0.0058072	0.00434783	0.00473934	0.00534296	0.00542215	0.00453662	0.00543679	0.00494641	0.00513093	0.00513809	0.00503029	0.00462963	0.00502874	0.00568182	0.00391118	0.00425834	0.00376648	0.00674974	0.003663	0.00531697	0.00305344	0.00294241	0.00510783	0.00471921	0.00300014	0.00307062	0.00618047	0.00123457	0.00499361	0.00263543	0.00221729	0.00279441	0.00255609	0.00298864	0.00432121		0.00209644
	0.00675024	0.00831474	0.00546373	0.00577911	0.00434011	0.00471143	0.00534188	0.0054146	0.0045277	0.00543642	0.00494308	0.00511866	0.0051364	0.00502475	0.00462788	0.00502707	0.00567491	0.00390879	0.00425021	0.00376344	0.00674764	0.00365477	0.00530856	0.00304878	0.00290577	0.00510771	0.00471479	0.00299457	0.00306905	0.00617792	0.00123001	0.00498803	0.00262998	0.00221694	0.00278455	0.00255145	0.00298592	0.00430794		0.00209205
	0.00673336	0.00831025	0.00544995	0.00576683	0.00433386	0.0047077	0.00534125	0.00539216	0.00452628	0.00543281	0.00494303	0.00510427	0.00512424	0.00502341	0.00462472	0.00502591	0.00564061	0.00389864	0.00424506	0.00375516	0.00673086	0.00363783	0.00529675	0.00304298	0.00289352	0.0051039	0.00470921	0.00299401	0.00306748	0.00617665	0.00121507	0.00497723	0.00262835	0.00221551	0.00278229	0.00253895	0.00298507	0.00430598		0.00208768
	0.00671628	0.00828618	0.00543024	0.00576435	0.00433213	0.00470404	0.00533061	0.00538637	0.00451955	0.0054173	0.00493218	0.00509284	0.00510801	0.00502176	0.00461775	0.00502163	0.00563777	0.00389484	0.00423453	0.00373134	0.00671141	0.00362319	0.00527983	0.00304204	0.00287297	0.00510041	0.0047081	0.00299273	0.00306243	0.00617284	0.00121359	0.00497587	0.00262743	0.00221321	0.00277078	0.00253807	0.0029834	0.0042876		0.00208768
	0.00669691	0.00827007	0.00542942	0.00576271	0.00433088	0.00469885	0.0053141	0.00538495	0.00450627	0.00541516	0.0049228	0.00507328	0.00510771	0.00497963	0.00460335	0.00502134	0.00562249	0.00388817	0.00422476	0.0037104	0.00671141	0.00361664	0.00527009	0.0030303	0.00286846	0.00509962	0.00470588	0.00299188	0.00305655	0.0061665	0.00121212	0.00497512	0.00262338	0.00219327	0.00276778	0.00253678	0.00298329	0.00427533		0.00208768
	0.00669068	0.00826997	0.00542776	0.00574988	0.00432961	0.00469743	0.00530139	0.00538462	0.00449018	0.00540158	0.00491976	0.00507292	0.00510173	0.00496963	0.00458645	0.00501452	0.00560897	0.00388514	0.00422323	0.0037037	0.00668532	0.00361555	0.00526408	0.00302768	0.00286205	0.00506187	0.00470465	0.00298592	0.00305577	0.00614828	0.00121065	0.00496689	0.00262044	0.00219164	0.00276753	0.00253678	0.00297746	0.00423065		0.00208333
	0.00667663	0.00821202	0.00542325	0.00574257	0.0043213	0.00469104	0.00528169	0.00538462	0.00448975	0.00539811	0.00490998	0.0050494	0.00509554	0.00495868	0.00458482	0.00500109	0.00560224	0.00386598	0.00422139	0.0037037	0.00668497	0.00360848	0.00522466	0.00302255	0.0028021	0.00505294	0.00469793	0.00298257	0.00304157	0.00612423	0.00120337	0.00495203	0.00261476	0.00218878	0.00275656	0.00253307	0.00297287	0.00422535		0.00207469
	0.0066762	0.00820068	0.00540651	0.00573463	0.00432121	0.00468443	0.00527786	0.00538414	0.0044843	0.00539657	0.00490509	0.00504308	0.00508417	0.00495514	0.00457085	0.00499659	0.0055788	0.0038563	0.00422136	0.00369595	0.00668287	0.00359942	0.00519545	0.00301583	0.00279301	0.00504801	0.00469352	0.00297872	0.00304105	0.00612206	0.00119904	0.0049505	0.00261165	0.00218558	0.00275103	0.00252154	0.00297124	0.00421617		0.00207469
	0.00667612	0.0082006	0.0054019	0.00571013	0.00432082	0.00466978	0.00527406	0.00537758	0.00447617	0.00535797	0.00489784	0.00503825	0.00508207	0.0049456	0.00455373	0.00499429	0.0055788	0.00384862	0.00421941	0.00369572	0.00666866	0.00359555	0.00518672	0.00301205	0.00278731	0.00504673	0.00467897	0.00296077	0.0030349	0.00611995	0.00119474	0.00494709	0.00260992	0.00218443	0.00275074	0.00251236	0.0029656	0.00421187		0.00207469
	0.00667062	0.00818833	0.00538145	0.00570962	0.00429711	0.00466667	0.00526692	0.00537258	0.004456	0.00535776	0.00489274	0.00502545	0.00507925	0.00494305	0.00454939	0.00499119	0.00556258	0.00384768	0.00421077	0.00369036	0.00665917	0.00359281	0.00518519	0.00300958	0.00277228	0.00504202	0.00467227	0.00294576	0.0030303	0.00611961	0.00119048	0.0049402	0.00260694	0.00218309	0.00274801	0.00250627	0.0029513	0.00420757		0.00206612
	0.00666787	0.00815439	0.00537364	0.00570529	0.00428082	0.00466321	0.00526677	0.00536998	0.00444691	0.00535349	0.00488889	0.00500835	0.00506529	0.00493546	0.00454918	0.0049884	0.00555275	0.00384246	0.00420644	0.00368724	0.00665877	0.00358056	0.00518039	0.00300639	0.0027659	0.00503567	0.00466978	0.00294525	0.0030303	0.00611957	0.00117509	0.00491803	0.00260643	0.00217944	0.00274725	0.00249643	0.00294877	0.00420757		0.00206186
	0.00665522	0.00815368	0.00537109	0.00570295	0.00428024	0.00466291	0.00526442	0.00533618	0.00444444	0.00534759	0.00488371	0.00499942	0.0050567	0.00491692	0.00451943	0.00497406	0.00554529	0.00382194	0.00420214	0.00367975	0.0066482	0.0035793	0.00517464	0.0030015	0.00276352	0.00503178	0.00466905	0.00294233	0.00302663	0.00610148	0.00116009	0.00491669	0.0026027	0.00217908	0.00274136	0.00248808	0.00294647	0.00418014		0.00205761
	0.00665457	0.00813008	0.00536939	0.00570033	0.00427611	0.00465851	0.00525554	0.00533595	0.00444067	0.00534135	0.00487029	0.00499821	0.00505272	0.004914	0.00451213	0.0049635	0.00553907	0.00381679	0.00418372	0.00367543	0.00664697	0.00357654	0.00516462	0.00299521	0.00276243	0.00499659	0.00464711	0.00293586	0.00302115	0.00605917	0.00114416	0.0049105	0.00260126	0.00217234	0.00273723	0.00248602	0.00294196	0.00416667		0.00205761
	0.006628	0.00811887	0.00535069	0.00569981	0.00426152	0.00464341	0.00525486	0.00533014	0.00442625	0.00533379	0.00486003	0.00497838	0.0050165	0.00491356	0.0045089	0.00496043	0.0055371	0.00381567	0.00417628	0.00366636	0.00663464	0.00357427	0.00514037	0.00299476	0.00275833	0.004995	0.00464377	0.00293454	0.00301659	0.00605681	0.00113895	0.00490798	0.00260087	0.00216576	0.00273268	0.00247875	0.00293665	0.00412031		0.00205339
	0.00661058	0.008115	0.00534933	0.00568101	0.00424524	0.00463855	0.00525021	0.0053301	0.00439014	0.00531915	0.00483325	0.00497622	0.00500884	0.00489596	0.0045045	0.00494438	0.00552486	0.0038059	0.00416733	0.0036623	0.00662526	0.00357015	0.00513699	0.00298507	0.00274801	0.00499474	0.00463831	0.00293255	0.00301054	0.00604351	0.00113122	0.00489978	0.00259716	0.00216242	0.00272678	0.00247801	0.00293363	0.00410362		0.00205339
	0.00660225	0.00810296	0.00533304	0.00566412	0.00424469	0.00463076	0.00524628	0.00532529	0.00438596	0.00531915	0.00482364	0.00497512	0.005	0.00488759	0.00449735	0.00494154	0.00551724	0.00379528	0.00416301	0.00362976	0.00660398	0.00356181	0.00513663	0.00298367	0.00272991	0.00498449	0.00460203	0.00292495	0.00300481	0.00604027	0.00112613	0.00489563	0.00259516	0.00216138	0.00272321	0.00247788	0.0029235	0.00409237		0.00204499
	0.00659444	0.00809134	0.00532298	0.00565611	0.00423985	0.0046225	0.00524329	0.00531686	0.0043802	0.00530786	0.00480914	0.00497512	0.00498753	0.00487013	0.00449438	0.00493405	0.00551655	0.0037932	0.00416089	0.00362669	0.00660308	0.00356178	0.00513259	0.00297567	0.00271956	0.00496562	0.00458968	0.00292479	0.00299809	0.00602732	0.00112486	0.00488986	0.00259471	0.00215827	0.00271936	0.00247563	0.00292113	0.00409054		0.00203252
	0.0065917	0.00808729	0.00532146	0.00564263	0.00423068	0.00462219	0.00522876	0.00530079	0.00435849	0.00530538	0.00479872	0.00497512	0.0049852	0.00484591	0.00448508	0.00492611	0.00550585	0.00377181	0.00416063	0.00362547	0.00657895	0.0035524	0.00512741	0.00297378	0.00271739	0.00495616	0.00457317	0.00292398	0.00298285	0.00600601	0.0011236	0.00486717	0.00259447	0.00215378	0.00271739	0.00247117	0.00291132	0.00407247		0.00203252
	0.00659134	0.00805085	0.00531287	0.00563579	0.00422724	0.00462033	0.00522814	0.00529718	0.00435161	0.00528834	0.00478575	0.00496974	0.00498392	0.00484262	0.004465	0.00492005	0.00546647	0.00374449	0.004158	0.00362319	0.00657767	0.00354925	0.0051261	0.00295761	0.00269542	0.00495413	0.00457143	0.00292255	0.00298151	0.00599377	0.00112108	0.00486548	0.00259445	0.00214401	0.0027137	0.00245933	0.00291121	0.00407166		0.0020202
	0.00657562	0.00804635	0.00530869	0.00562852	0.00422705	0.00461803	0.00522778	0.00528302	0.00432103	0.00528614	0.00478136	0.00496032	0.00498072	0.00483871	0.00445931	0.00492005	0.00546448	0.00373483	0.00414469	0.00361832	0.0065731	0.00354846	0.00510538	0.00295234	0.0026738	0.0049505	0.00456811	0.00291545	0.00298126	0.00598802	0.00111732	0.00486239	0.00257014	0.0021335	0.0027129	0.00245481	0.0029098	0.00406009		0.0020202
	0.00657326	0.00802334	0.00529801	0.00562236	0.00421891	0.00460589	0.00522739	0.00527206	0.00431896	0.00528032	0.00478071	0.00495719	0.00496627	0.00483712	0.00444972	0.00491688	0.0054442	0.00372975	0.00414365	0.00360855	0.00656403	0.00354223	0.00507682	0.00294345	0.00266845	0.0049505	0.00456558	0.00290818	0.00298063	0.00595081	0.00111732	0.00483822	0.00256928	0.00212314	0.00271076	0.0024494	0.00290828	0.00405817		0.0020202
	0.00656604	0.00801913	0.00529451	0.00561224	0.00420939	0.00459007	0.00522193	0.00526712	0.00431612	0.00527426	0.0047628	0.0049505	0.00494856	0.00483215	0.00444774	0.00491642	0.00543933	0.00372546	0.00414365	0.00360475	0.00654753	0.00353982	0.00502197	0.00294241	0.00265722	0.00494981	0.00455182	0.00290497	0.00297841	0.00593824	0.00111359	0.00483491	0.00256866	0.00212194	0.00270453	0.00244822	0.00290698	0.00405072		0.00201613
	0.00654525	0.00795985	0.00528961	0.00560915	0.0042065	0.00458248	0.00521558	0.0052656	0.00431488	0.00526316	0.00475857	0.00493827	0.0049456	0.00482903	0.00444371	0.00491618	0.00543901	0.00372324	0.00414336	0.0036038	0.00654143	0.00353964	0.00501561	0.00294074	0.00265604	0.00494451	0.0045332	0.00290276	0.00296589	0.00591949	0.00111235	0.00481928	0.00256559	0.00212129	0.00267977	0.00244598	0.00290381	0.00404858		0.0020141
	0.00653391	0.00793217	0.00528479	0.00560718	0.00420447	0.00457347	0.00518135	0.00525461	0.00431099	0.00526008	0.00475594	0.00493268	0.00492909	0.00482703	0.00444129	0.00491126	0.00542299	0.00372033	0.00412567	0.00360198	0.00653862	0.00351541	0.00501157	0.00294031	0.00261011	0.0049437	0.00452855	0.00289296	0.00296209	0.00590179	0.00110988	0.00480494	0.00256287	0.00211889	0.00267917	0.00244086	0.00289995	0.00404152		0.002
	0.00651466	0.0078928	0.00528144	0.00560702	0.0042	0.00457256	0.00517516	0.00525097	0.00430935	0.00525855	0.00474663	0.00491602	0.0049239	0.00482625	0.00443881	0.0048919	0.00541738	0.00370625	0.00412047	0.00359964	0.00652316	0.00351339	0.00500732	0.00293994	0.00260782	0.00492773	0.00449727	0.00289226	0.00295567	0.00589255	0.00110865	0.00479616	0.00255959	0.0021164	0.0026768	0.00242461	0.00289939	0.00403826		0.002
	0.00651303	0.0078725	0.00527578	0.00559983	0.00419308	0.00456621	0.00516763	0.00524762	0.00428341	0.00525394	0.00473996	0.00490873	0.00491688	0.0048185	0.0044335	0.00489039	0.00540394	0.00370421	0.00411438	0.00359513	0.00652216	0.00350542	0.00499904	0.00293974	0.00260281	0.00492057	0.00449255	0.00289076	0.0029383	0.00588466	0.00110742	0.0047781	0.00255918	0.00211472	0.00265051	0.00242057	0.00289815	0.00400996		0.00199601
	0.0065024	0.00786851	0.00526537	0.00559647	0.00419255	0.00456621	0.00516592	0.00524745	0.0042796	0.0052506	0.00471698	0.00490609	0.00491629	0.00480979	0.0044287	0.00487567	0.00540387	0.0036914	0.00411061	0.00358423	0.00652045	0.00349462	0.00498168	0.00293542	0.00259459	0.00490557	0.00449219	0.00289017	0.00293399	0.00588235	0.00110497	0.00476443	0.00255428	0.00211416	0.00263505	0.00241922	0.00289615	0.00400941		0.00198807
	0.0065	0.00785855	0.00523756	0.00558659	0.0041841	0.0045623	0.00515021	0.00524219	0.00425967	0.00524434	0.00471098	0.00490063	0.00491256	0.00480769	0.00441566	0.00487508	0.00540197	0.00369004	0.00410889	0.00356133	0.00650407	0.00349413	0.00490449	0.00293255	0.00257945	0.00490303	0.00448843	0.00288984	0.00292826	0.00586963	0.00110375	0.00474777	0.00255211	0.00210902	0.00263204	0.00241047	0.00288739	0.00400842		0.00198413
	0.00649351	0.00783945	0.00523311	0.00558399	0.00417973	0.00455235	0.00515014	0.00524138	0.00424371	0.0052381	0.00471092	0.00489396	0.00490102	0.00479372	0.00439773	0.00486618	0.00538117	0.00367647	0.00410584	0.00355745	0.00650174	0.00349224	0.00490396	0.00293205	0.0025719	0.00488423	0.00447974	0.0028866	0.00291971	0.0058651	0.00110375	0.00473793	0.00255048	0.00210526	0.00263032	0.00240783	0.00288698	0.00400057		0.0019802
	0.00648298	0.0078329	0.00523176	0.00557967	0.00417053	0.00455235	0.00512935	0.00524109	0.00422337	0.00523401	0.00470259	0.00489047	0.00483871	0.00478469	0.00439606	0.00485909	0.00537956	0.00367537	0.00410354	0.0035475	0.00649351	0.00349142	0.00488599	0.00291545	0.0025641	0.00486618	0.00447189	0.002886	0.00291262	0.00586207	0.00110254	0.004725	0.00254907	0.00210084	0.00262927	0.0023976	0.00288141	0.004		0.0019802
	0.00648207	0.00780252	0.0052243	0.00557325	0.00416988	0.00454849	0.00510505	0.00523169	0.00421385	0.00522718	0.00468384	0.00488181	0.00483698	0.00478469	0.00438917	0.00485673	0.00535475	0.00367265	0.00410055	0.00352656	0.00648824	0.0034823	0.00488349	0.00291545	0.00256328	0.00486505	0.00444917	0.00288422	0.00291121	0.00586058	0.00109769	0.00472175	0.00254838	0.00210084	0.00261976	0.00239521	0.00288121	0.00399787		0.00197239
	0.00647333	0.00778816	0.00522193	0.00556483	0.00416853	0.00454686	0.00509383	0.00522265	0.004197	0.00520145	0.00468306	0.00486741	0.00483425	0.00477816	0.00438757	0.00484299	0.00535077	0.00366898	0.00409397	0.00352617	0.0064741	0.00347178	0.00486692	0.0029152	0.00254065	0.00484429	0.00444253	0.00287977	0.00291121	0.00584084	0.00109529	0.00471698	0.00254833	0.0021	0.00261584	0.00239284	0.00287711	0.0039801		0.0019685
	0.00647126	0.00777527	0.00520464	0.00556152	0.00415838	0.00453763	0.00509165	0.00522051	0.00419507	0.00519931	0.00467405	0.00482383	0.0048329	0.00477555	0.00438734	0.00483611	0.00533333	0.00366709	0.00407194	0.0035137	0.00644084	0.00346852	0.00486027	0.00291309	0.0025	0.00483504	0.00444187	0.00287278	0.00289645	0.0058309	0.00109529	0.00471294	0.00254453	0.00209962	0.00260485	0.0023927	0.00287522	0.0039783		0.00196464
	0.00646172	0.00776719	0.00518807	0.00554895	0.004158	0.00453733	0.00508776	0.00520494	0.00419463	0.00518852	0.00466511	0.00482212	0.00483023	0.00476486	0.00438199	0.00483092	0.00531766	0.00366242	0.00407056	0.00350365	0.00643032	0.00346098	0.00485973	0.0029098	0.00249377	0.00482641	0.00443844	0.00286663	0.00289157	0.00581959	0.0010929	0.00468484	0.0025413	0.00208496	0.00260078	0.00238036	0.0028715	0.00397772		0.00196464
	0.00645902	0.00775394	0.00518314	0.00554347	0.00414625	0.00452159	0.00508475	0.00520218	0.00411999	0.00518807	0.00465684	0.0048	0.00481303	0.00473895	0.00437697	0.00482686	0.00530179	0.00364964	0.00404858	0.00349843	0.00641774	0.00344778	0.00483155	0.00290867	0.00248398	0.00482291	0.00441676	0.00286533	0.00288684	0.0058193	0.0010929	0.00467952	0.00254112	0.00207972	0.00259863	0.00237933	0.0028715	0.00394945		0.00195312
	0.00645705	0.00774527	0.00518135	0.00553691	0.00414079	0.00452097	0.00507063	0.00519539	0.00411872	0.00518711	0.0046365	0.00478297	0.00480475	0.0047321	0.00437445	0.0048235	0.0052755	0.00363706	0.00404714	0.00349206	0.00641026	0.0034463	0.00482592	0.00288913	0.00245399	0.00481283	0.0044036	0.00286492	0.00288323	0.00580309	0.0010929	0.00467836	0.00253197	0.00207751	0.002595	0.0023678	0.00287003	0.00393258		0.00195312
	0.00645342	0.00770713	0.00518085	0.0055336	0.00413418	0.0045208	0.00505902	0.00517928	0.00411555	0.00517837	0.00462487	0.00478222	0.00480447	0.00472947	0.00436258	0.00481441	0.00524044	0.00363636	0.00404267	0.00348675	0.00639013	0.00342173	0.00480236	0.00286533	0.00243576	0.00481116	0.004395	0.00286029	0.00287356	0.00578541	0.0010917	0.00466215	0.00253165	0.00207684	0.00259366	0.00236531	0.00286968	0.00393153		0.00194932
	0.00645252	0.00770548	0.00516746	0.0055226	0.00412131	0.00451603	0.00504891	0.00517688	0.00410734	0.00517757	0.00461538	0.00477897	0.00480427	0.00472565	0.00434783	0.00479904	0.00523169	0.00363636	0.00404229	0.0034823	0.00638978	0.00341841	0.00479616	0.00286416	0.00243524	0.00478053	0.00439486	0.00285671	0.00287253	0.00577889	0.0010917	0.00465426	0.00252697	0.00206754	0.00259067	0.0023623	0.00286757	0.00392773		0.0019305
	0.00644217	0.00770449	0.00515668	0.00551369	0.00411297	0.00446304	0.00503933	0.00516209	0.00410678	0.00517382	0.00461442	0.00477327	0.00479549	0.00472069	0.00432277	0.00479671	0.00522648	0.00361011	0.00401606	0.00347058	0.00638699	0.00341763	0.00479466	0.00286287	0.00242915	0.00477747	0.00439367	0.00284464	0.00286944	0.0057648	0.00109051	0.00465116	0.00252553	0.00205729	0.0025905	0.00236162	0.00286281	0.0039267		0.0019305
	0.00643366	0.00767837	0.00515372	0.00551288	0.00411115	0.00446062	0.00503271	0.00514801	0.0041019	0.00515675	0.00460976	0.00476725	0.00477653	0.00471889	0.00431779	0.00478718	0.00522565	0.00360017	0.00400133	0.00347041	0.00637523	0.00341686	0.00479042	0.00285889	0.00242849	0.00475755	0.00438796	0.00284385	0.0028626	0.00575932	0.00108932	0.00460918	0.00252446	0.0020517	0.00258532	0.0023596	0.0028626	0.00391945		0.00192308
	0.00643137	0.00767153	0.00514403	0.00550551	0.00410641	0.0044484	0.00503145	0.00514249	0.00410147	0.00513611	0.00460499	0.00474224	0.0047619	0.00471698	0.00431614	0.00478469	0.00521921	0.00359874	0.00399006	0.00346901	0.00637303	0.00341424	0.00478387	0.00285663	0.00240827	0.00475018	0.00437346	0.00283996	0.00286123	0.00569358	0.00108696	0.00459242	0.00251846	0.0020432	0.00258459	0.00235398	0.00286174	0.00390294		0.00191939
	0.00642336	0.00766962	0.0051368	0.00550176	0.00410557	0.00443881	0.00503066	0.00513281	0.00408322	0.00511225	0.00460081	0.00472654	0.0047616	0.0047123	0.00429185	0.00478354	0.00520291	0.00358045	0.00396825	0.00346846	0.00636823	0.0034116	0.00476948	0.00285533	0.00239589	0.0047486	0.0043556	0.00283412	0.00285307	0.0056899	0.00108696	0.0045904	0.00251604	0.00204221	0.00257806	0.00235018	0.00285769	0.00390255		0.00191939
	0.00642109	0.00764583	0.00513314	0.00548847	0.00410379	0.00442635	0.005	0.00512821	0.00408219	0.00511207	0.00460009	0.00471118	0.00475984	0.00471162	0.00428908	0.00478293	0.00519211	0.00357488	0.00396776	0.00346407	0.00636807	0.00340909	0.00475436	0.00285388	0.00239489	0.00472394	0.00435066	0.00282543	0.00285036	0.00566893	0.00108578	0.00457256	0.00251296	0.00204051	0.00257769	0.00234192	0.00285769	0.00389408		0.00191939
	0.00641319	0.00762565	0.00512666	0.00547966	0.00410305	0.00441929	0.00498931	0.00512295	0.00407651	0.00510934	0.0046	0.00470958	0.0047502	0.00469885	0.0042796	0.00477664	0.00518807	0.00357356	0.00395484	0.0034622	0.00636531	0.00340877	0.00474809	0.00284347	0.00238253	0.00469326	0.00434541	0.00282111	0.00284495	0.00564726	0.00108108	0.00456756	0.00249554	0.00203626	0.00257637	0.00234192	0.00285714	0.0038656		0.00191571
	0.0064049	0.00758294	0.00512246	0.00547445	0.00409491	0.00441801	0.00497667	0.00512013	0.00407422	0.00510819	0.00459866	0.00470476	0.00475006	0.00469153	0.00426807	0.00477125	0.00517837	0.00357239	0.00395053	0.00345338	0.00635497	0.00340832	0.0047402	0.00284333	0.00235244	0.00466527	0.00433094	0.00281965	0.0028436	0.00564717	0.00107991	0.00456274	0.00248963	0.00203576	0.0025759	0.00233885	0.00285036	0.00386454		0.00191571
	0.00639287	0.00755482	0.00510508	0.0054562	0.00409378	0.00441623	0.00495926	0.00511787	0.00406931	0.00510702	0.00458866	0.00469799	0.00474106	0.00468384	0.00426634	0.00476802	0.00517063	0.00357143	0.00394789	0.00345152	0.00633502	0.00340136	0.00473509	0.00284281	0.00234349	0.00466244	0.0043239	0.0028169	0.00284322	0.00563813	0.00107527	0.0045529	0.0024895	0.00203177	0.00257069	0.00233023	0.00284576	0.00386242		0.00191571
	0.00638441	0.00754575	0.00509925	0.00545364	0.00408719	0.00440729	0.00495427	0.00509742	0.00404088	0.00510441	0.00458486	0.00468933	0.00473934	0.00466487	0.00426483	0.0047619	0.00515844	0.0035686	0.00394737	0.00345145	0.00632653	0.00339487	0.00471063	0.00282865	0.00233973	0.00465998	0.00431682	0.00281426	0.00284091	0.00563258	0.00107527	0.00454856	0.00248919	0.00203087	0.0025652	0.00232903	0.00284242	0.003861		0.00191571
	0.00638081	0.00753968	0.00509678	0.00545282	0.00408548	0.00440186	0.00494979	0.00509408	0.00402881	0.0051037	0.00456784	0.00467498	0.00473709	0.00465839	0.00426439	0.00475624	0.00515158	0.00356125	0.00393185	0.00345066	0.00629149	0.00339271	0.00471048	0.00282111	0.00233674	0.00465175	0.00429526	0.00280297	0.00284091	0.0056243	0.00107411	0.00452916	0.00248845	0.00202748	0.00255801	0.00232498	0.00284091	0.003861		0.00191205
	0.00634921	0.00752274	0.00509461	0.00544588	0.00407719	0.00439883	0.00494438	0.00508788	0.0040282	0.00509338	0.00456621	0.00467195	0.00473653	0.00465622	0.00425953	0.00474129	0.00514706	0.00355809	0.00392631	0.00344828	0.00627615	0.00339051	0.00469083	0.00281319	0.00233372	0.00464396	0.0042735	0.00280235	0.00283949	0.00562315	0.00107411	0.00451512	0.00248694	0.0020174	0.00255288	0.00232198	0.00282486	0.00384145		0.0019084
	0.00634082	0.00751345	0.00509413	0.00544465	0.00406918	0.00439296	0.0049416	0.00508721	0.00399135	0.005092	0.00453376	0.00465793	0.00472725	0.00464684	0.0042517	0.00474121	0.0051458	0.00355527	0.00391692	0.00344688	0.00627199	0.00338923	0.00467387	0.0028087	0.00231392	0.00463872	0.00427129	0.00279818	0.0028393	0.00560652	0.00107411	0.00451345	0.00247661	0.00201478	0.00255189	0.0023175	0.00282124	0.00382096		0.0019084
	0.0063322	0.0075	0.00509392	0.00544323	0.00406504	0.00439061	0.00493533	0.00507509	0.00397656	0.00508032	0.00453361	0.00464446	0.00470194	0.00464191	0.00422215	0.00473836	0.00513699	0.00353812	0.00391207	0.00344105	0.00625978	0.00338524	0.00464585	0.00280456	0.00228833	0.00463679	0.00426579	0.00279401	0.00283889	0.00560501	0.00107296	0.00450113	0.00247471	0.00201468	0.00255102	0.00231541	0.00282008	0.00381373		0.00190476
	0.00632547	0.00748951	0.00508059	0.00544279	0.00405176	0.00438939	0.00493514	0.00507328	0.00396727	0.00507104	0.0045205	0.00464418	0.0046982	0.00464037	0.00421687	0.00473499	0.00512821	0.00353686	0.00391007	0.00343249	0.00625695	0.003367	0.00463405	0.00279969	0.00227704	0.00463215	0.00426154	0.00279262	0.00283286	0.00559888	0.00107066	0.0044843	0.00247191	0.0020141	0.00254963	0.00230914	0.00281889	0.00381194		0.00189934
	0.00631348	0.00746269	0.00506732	0.00543725	0.00404561	0.00438596	0.00493353	0.0050555	0.00396625	0.00506146	0.00451992	0.00463353	0.00469778	0.00464037	0.00421099	0.00473475	0.00511945	0.00352858	0.00389769	0.00342349	0.00617997	0.00335934	0.00462963	0.00279491	0.00227052	0.00462963	0.00425532	0.00279141	0.00283286	0.00559611	0.00106952	0.00448029	0.00246875	0.00201121	0.00254499	0.00230382	0.00281873	0.00378527		0.00189753
	0.00631247	0.00746148	0.0050672	0.00543607	0.00404281	0.00438596	0.00493264	0.0050468	0.00395491	0.00503919	0.00451199	0.00461681	0.00468584	0.00463894	0.00418994	0.00472505	0.00511654	0.00352439	0.00389059	0.00342253	0.00617561	0.00334923	0.00462585	0.0027945	0.00226586	0.00461627	0.0042341	0.00278871	0.00282952	0.00558521	0.00106838	0.00447361	0.00245902	0.00200803	0.00254151	0.00229951	0.00281611	0.00377284		0.00189394
	0.00629591	0.00745413	0.00506329	0.0054137	0.00403877	0.00438131	0.00492971	0.00504386	0.00393908	0.00503605	0.00450958	0.00461627	0.004677	0.00463128	0.00418779	0.0047221	0.00510986	0.00352201	0.00388286	0.00342219	0.00616122	0.00334688	0.00462185	0.00279278	0.00226244	0.00460829	0.00422893	0.00278707	0.00282885	0.00557448	0.00106496	0.0044713	0.00245861	0.00200602	0.00254108	0.00229826	0.00281562	0.00373333		0.00189036
	0.00628437	0.00745342	0.00504988	0.00540216	0.00403522	0.00438052	0.00492746	0.00504032	0.0039267	0.00502152	0.00450176	0.00460405	0.00467341	0.00463031	0.00416811	0.0047138	0.00510986	0.00352113	0.0038784	0.00341853	0.00615385	0.0033456	0.00460405	0.00279232	0.0022568	0.00458631	0.00422675	0.00278607	0.00282885	0.00556439	0.00106496	0.00446862	0.00245776	0.00200535	0.00253708	0.00229299	0.00281426	0.00373278		0.00189036
	0.00627842	0.00745033	0.00503416	0.00540142	0.00403226	0.00437445	0.00492409	0.00502821	0.00391972	0.0050026	0.00450155	0.0045972	0.00465748	0.00462565	0.00416487	0.00471204	0.00510204	0.00350227	0.00387015	0.0034163	0.00614635	0.00334094	0.00458878	0.00277596	0.00224004	0.00458524	0.00421941	0.00277618	0.00282558	0.00555864	0.00106383	0.00444922	0.002457	0.0019996	0.00253614	0.00228685	0.00281294	0.00373225		0.00188679
	0.00627654	0.00744395	0.00502765	0.00539018	0.00400802	0.00436714	0.0049086	0.00502202	0.00391562	0.00498201	0.0044908	0.00459638	0.00464876	0.00461976	0.00415832	0.00470127	0.00508906	0.00349916	0.00386064	0.00340886	0.0061442	0.0033389	0.00458573	0.00277521	0.00223964	0.00457847	0.00421769	0.00277551	0.0028222	0.00555467	0.00106045	0.00444664	0.00245654	0.001999	0.00252936	0.00227445	0.00281162	0.00369198		0.00188324
	0.00626468	0.00744263	0.00502689	0.00538922	0.00400736	0.00436602	0.00489147	0.00501114	0.00391059	0.00497512	0.00448143	0.00458315	0.00464556	0.00461428	0.00414458	0.00470016	0.00508666	0.00348624	0.00383859	0.00340522	0.00613395	0.00332779	0.00458076	0.00277173	0.00222263	0.00457666	0.00420811	0.00277425	0.00282031	0.0055517	0.00105932	0.00443131	0.00245499	0.00199295	0.00252876	0.00226815	0.00279642	0.00367647		0.00188324
	0.00625541	0.0074248	0.00502513	0.00535714	0.004004	0.00436001	0.00488365	0.00500513	0.00390625	0.00497433	0.00447914	0.00457352	0.00464476	0.00461221	0.00413763	0.00469219	0.00508421	0.00348152	0.00381971	0.00340436	0.00613371	0.003323	0.00457746	0.0027704	0.00221533	0.00457005	0.00420364	0.00277118	0.00281162	0.00555042	0.00105932	0.00442841	0.00245455	0.00198319	0.00252818	0.00226684	0.00279408	0.00367412		0.0018797
	0.00623701	0.00742306	0.00502468	0.00534478	0.004002	0.00435771	0.00488281	0.0049922	0.00390205	0.00497265	0.00447123	0.00457218	0.00464002	0.00460829	0.00412882	0.00468125	0.00506446	0.0034711	0.0038187	0.00340418	0.00613111	0.00331858	0.00456212	0.00277008	0.00219692	0.00456547	0.00419874	0.00277104	0.00280584	0.00554324	0.00105708	0.0044277	0.00245173	0.00197905	0.00252662	0.00226224	0.0027933	0.00367363		0.0018797
	0.00622711	0.00740649	0.00501287	0.00534135	0.0039934	0.00435152	0.00487805	0.00498132	0.00389105	0.00496972	0.00443686	0.00456621	0.00463679	0.0046034	0.00412655	0.00467931	0.00503525	0.0034632	0.00381232	0.00339389	0.00610951	0.00331263	0.00454959	0.00276778	0.00216718	0.00456308	0.00418241	0.00276831	0.00280584	0.00553309	0.00105485	0.00442662	0.00245098	0.00197589	0.00252419	0.00226017	0.00279259	0.00367213		0.0018797
	0.00620918	0.00740573	0.00500309	0.00532907	0.00399008	0.00434206	0.00487728	0.00498107	0.00388895	0.00496894	0.00443022	0.00456204	0.00463638	0.00460103	0.00412371	0.00467727	0.00502197	0.00345109	0.00378329	0.00338835	0.00610854	0.00331175	0.00454959	0.00276693	0.00216522	0.00456014	0.00416769	0.00276312	0.00280112	0.00552721	0.00104712	0.00440252	0.00243977	0.00197493	0.00252242	0.00225175	0.00279046	0.00367135		0.00187617
	0.00620534	0.00738751	0.00495283	0.0053202	0.00398924	0.00433735	0.00487589	0.00497956	0.00388802	0.0049688	0.00442681	0.00455717	0.00462046	0.00460035	0.00412015	0.00465994	0.00499412	0.0034472	0.00377358	0.00338219	0.00608305	0.00330863	0.00454279	0.00276243	0.00216035	0.00453559	0.00416305	0.0027575	0.00280014	0.00551724	0.00104493	0.00440044	0.0024394	0.00197463	0.00251889	0.00223714	0.00278622	0.00366422		0.00187617
	0.00620525	0.00738007	0.00495254	0.00531915	0.0039794	0.00433295	0.00486971	0.00496752	0.00388507	0.00496718	0.00442677	0.00455704	0.00461627	0.00459237	0.00411147	0.00465959	0.00497512	0.00344234	0.00375504	0.00337194	0.00607903	0.00328578	0.00454103	0.0027554	0.00213904	0.00452117	0.00415896	0.00275637	0.0027972	0.00551705	0.00104384	0.00439434	0.00241765	0.00197239	0.00251794	0.00223605	0.00278048	0.00365912		0.00187617
	0.00618876	0.007369	0.00495182	0.00530547	0.00397029	0.00433014	0.00486872	0.00496649	0.00388182	0.00496399	0.00440165	0.00455154	0.00461589	0.00457098	0.00411088	0.00465658	0.00496919	0.00343053	0.00375086	0.00337173	0.00607639	0.00328228	0.00453001	0.00275103	0.00213654	0.00451535	0.00415828	0.00275482	0.0027972	0.00551074	0.00104384	0.00437254	0.00241546	0.00197109	0.00251256	0.00223447	0.00277264	0.00364999		0.00187617
	0.00618753	0.00736483	0.00493698	0.00530314	0.00396478	0.00432077	0.00486618	0.00494868	0.00387898	0.00495868	0.00439648	0.00451698	0.00461187	0.00455023	0.00410959	0.00465577	0.00494109	0.0034163	0.00375078	0.00336391	0.00607375	0.00328176	0.0045082	0.00274809	0.00211216	0.00450886	0.00415102	0.00275426	0.00279677	0.00548355	0.00104058	0.00437227	0.00240657	0.00196519	0.00251099	0.00223214	0.00277162	0.00364964		0.00187266
	0.00617371	0.00735632	0.00492449	0.00529346	0.00396152	0.00431655	0.00485535	0.00493903	0.00386424	0.00494886	0.00438734	0.00451523	0.00459619	0.00453944	0.00410959	0.00465465	0.00493359	0.00341241	0.00374862	0.00336289	0.00606818	0.00327955	0.00450331	0.00274725	0.00209293	0.00449205	0.00414727	0.00275092	0.00279441	0.00548215	0.0010395	0.00436069	0.00240227	0.00196232	0.0025085	0.00223001	0.00277008	0.00364409		0.00186567
	0.00616457	0.00733496	0.00491741	0.00529007	0.0039604	0.00430262	0.0048548	0.00493421	0.00386029	0.0049487	0.00437789	0.0045106	0.00459173	0.00453569	0.00410194	0.00465449	0.00491803	0.00340545	0.00374429	0.00336267	0.00605466	0.00327749	0.00449871	0.00274537	0.00209293	0.00447094	0.00414508	0.00274123	0.0027907	0.00548082	0.00103842	0.00435689	0.00240096	0.00196223	0.00250784	0.00222222	0.00276973	0.00362319		0.00186567
	0.00615836	0.0073187	0.00491656	0.00528311	0.00395863	0.00429799	0.00485437	0.00492553	0.0038562	0.00493182	0.00437192	0.00451031	0.00458579	0.00453458	0.00409077	0.00464985	0.00487465	0.00340522	0.00373134	0.00335993	0.00605463	0.00327108	0.00449459	0.0027451	0.00208768	0.00446097	0.00414062	0.0027408	0.00278552	0.00547379	0.00103842	0.00434873	0.00239747	0.0019595	0.00250671	0.00222222	0.00276116	0.00361899		0.00186567
	0.00614286	0.00731812	0.00490716	0.00527919	0.00394755	0.00427077	0.00484702	0.00491913	0.00384862	0.00493097	0.00436777	0.00447792	0.00456837	0.00452951	0.00408163	0.00464807	0.00486224	0.0034019	0.00370812	0.00335852	0.00604113	0.00326082	0.00447609	0.00274375	0.00206292	0.00445269	0.00413345	0.00273935	0.00277874	0.00546672	0.00103199	0.00433767	0.00239644	0.00195631	0.00250447	0.0022194	0.002749	0.00360825		0.0018622
	0.00613661	0.00729227	0.00490425	0.00526316	0.00393908	0.00425015	0.00484144	0.00490928	0.00384115	0.00492057	0.0043573	0.00445434	0.00456668	0.00452675	0.00405533	0.00462175	0.00485437	0.00340136	0.00368664	0.0033557	0.00602196	0.00325896	0.00447222	0.00273523	0.00205973	0.00444596	0.00413223	0.00272904	0.00277521	0.00545432	0.00103093	0.00432999	0.00239554	0.00195312	0.00249816	0.00221435	0.00273396	0.0035983		0.00185874
	0.00612996	0.0072854	0.00490415	0.00526316	0.00393883	0.00424225	0.00484043	0.00490798	0.00383903	0.0049173	0.00435572	0.00443459	0.00456026	0.0044964	0.0040518	0.00461681	0.00483516	0.00339641	0.00368155	0.00335071	0.0060207	0.00325402	0.00446429	0.00273183	0.00203087	0.00444074	0.00412552	0.00272016	0.00277008	0.00544514	0.00102775	0.00432488	0.00239521	0.00195291	0.00249703	0.00221164	0.0027248	0.00359138		0.00185874
	0.00612975	0.00727537	0.00489596	0.0052599	0.00392756	0.00424022	0.00483001	0.00490445	0.0038337	0.00491332	0.00434641	0.00443059	0.00455845	0.00448854	0.00404131	0.00458314	0.0048166	0.00339528	0.00367816	0.00334979	0.00599808	0.00325239	0.0044636	0.00272777	0.00202429	0.00444006	0.00412306	0.00271831	0.00276855	0.0054437	0.00102669	0.0043246	0.00239286	0.00193906	0.00249421	0.00220938	0.00272331	0.00359066		0.00185185
	0.00612786	0.00726518	0.00488918	0.00524934	0.00392259	0.00423989	0.0048216	0.00489282	0.00383024	0.0049128	0.00434297	0.00442538	0.00455208	0.0044843	0.00402989	0.00455276	0.00481314	0.00339443	0.00367171	0.00334076	0.00599341	0.00324886	0.00445854	0.00272727	0.0020202	0.0044335	0.00411067	0.00271771	0.00276753	0.00543737	0.00101833	0.00432335	0.00239265	0.00193819	0.00249233	0.00220933	0.00272171	0.00358275		0.00185185
	0.00611205	0.00725726	0.0048823	0.00523338	0.00391802	0.00423908	0.00481831	0.00488663	0.00382444	0.00491033	0.00431499	0.00442239	0.00453992	0.00448282	0.0040293	0.00454981	0.00481	0.00337895	0.00366961	0.0033389	0.00597221	0.00324734	0.0044484	0.00272365	0.00201613	0.00442478	0.00410926	0.00270884	0.00276243	0.00542373	0.00101729	0.00432199	0.00239006	0.00193302	0.00248281	0.00220414	0.00272056	0.00357309		0.00184332
	0.00610909	0.00724852	0.00487805	0.00522739	0.00391773	0.00422007	0.00481744	0.00487945	0.00382096	0.00490436	0.00431336	0.00442198	0.00453564	0.0044774	0.00402808	0.00452923	0.00480307	0.00337774	0.00366531	0.00333704	0.00596817	0.00324631	0.00444744	0.00271528	0.00201288	0.00442248	0.00410889	0.00270721	0.00276243	0.00541774	0.00101317	0.00431655	0.00238699	0.00193115	0.00248027	0.00220345	0.00271538	0.00357143		0.00183824
	0.0061011	0.00724848	0.00486618	0.00522668	0.00390687	0.00420954	0.00481155	0.00487385	0.00380907	0.00490323	0.00431164	0.00442087	0.00451568	0.00447454	0.00402685	0.00452007	0.00480226	0.00336613	0.0036645	0.0033364	0.00596685	0.00324374	0.00444145	0.00270346	0.00201207	0.00441201	0.00410537	0.00269985	0.00276243	0.00541321	0.00101215	0.00430863	0.00238039	0.00192369	0.00247355	0.00220316	0.0027115	0.00353893		0.0018315
	0.0060957	0.00724638	0.00485396	0.00522565	0.00389584	0.00420916	0.00479361	0.00484984	0.00380313	0.00489064	0.00431034	0.00441402	0.00451467	0.00446927	0.00401837	0.00451977	0.00479616	0.00336559	0.00366148	0.00333519	0.0059645	0.0032389	0.00442814	0.00270183	0.00200501	0.00440385	0.00410291	0.00269872	0.00276148	0.00540054	0.00101112	0.00429752	0.00237937	0.00192123	0.00247135	0.0022007	0.00271003	0.00353218		0.0018315
	0.00608794	0.00723545	0.00485337	0.00521859	0.00388428	0.00420706	0.00479185	0.00484375	0.00378158	0.00488895	0.00430637	0.00441393	0.00450664	0.00445996	0.00400415	0.00450902	0.0047836	0.00335871	0.00364906	0.00332454	0.00595238	0.00322234	0.00441576	0.0027012	0.0020012	0.004403	0.00408163	0.00269663	0.00275482	0.00540033	0.0010101	0.00428972	0.00236967	0.00192	0.00247083	0.00219857	0.00270819	0.00353107		0.00182149
	0.00608453	0.00723483	0.00484203	0.00521574	0.00387777	0.00420643	0.0047856	0.00483221	0.00376506	0.0048835	0.00429185	0.00439214	0.00450647	0.00445781	0.004004	0.0045022	0.00478065	0.00335731	0.00362632	0.00331204	0.00595107	0.00321543	0.00440917	0.00269542	0.00199953	0.004393	0.004079	0.00269507	0.0027533	0.00537903	0.00100705	0.00428908	0.00234388	0.00191939	0.00246761	0.0021978	0.00270392	0.00353086		0.00181488
	0.00607399	0.00722825	0.00484072	0.00520677	0.00385989	0.00420168	0.00478469	0.0048219	0.00376209	0.00487954	0.0042895	0.00438859	0.00450311	0.00443705	0.00400178	0.00447518	0.00475705	0.00335008	0.00362589	0.00329218	0.00593298	0.00320807	0.00439115	0.00269389	0.00199681	0.0043881	0.00406174	0.00268817	0.00275229	0.00537634	0.00100604	0.00428825	0.00233794	0.00191755	0.00246609	0.00219729	0.00269334	0.00352912		0.00181488
	0.0060736	0.00721598	0.00483196	0.00518832	0.00385261	0.00419936	0.0047824	0.00481472	0.00376053	0.00487419	0.00428571	0.00438596	0.00449761	0.00443232	0.004	0.00447518	0.00475342	0.00334448	0.00361867	0.00328577	0.00592965	0.00320602	0.00439041	0.00268336	0.00199045	0.00438665	0.00405166	0.0026727	0.00275061	0.00536955	0.00100301	0.00428449	0.00233281	0.00191738	0.00245292	0.00219539	0.00269151	0.00351535		0.00181159
	0.00607091	0.00720807	0.00483092	0.0051716	0.00384973	0.00419646	0.00478076	0.00481137	0.00375352	0.00487373	0.00428571	0.0043758	0.00449214	0.00442674	0.003998	0.00445633	0.00475259	0.00334054	0.00360685	0.00328571	0.00592833	0.00320513	0.00437397	0.00268097	0.00198076	0.00438301	0.00404858	0.00267082	0.00274725	0.00535988	0.00100301	0.00427639	0.00232417	0.00191245	0.00244978	0.00219499	0.00269088	0.00351442		0.00180505
	0.00607034	0.00717328	0.00483005	0.00516106	0.0038306	0.00419111	0.00477327	0.00480468	0.00375235	0.00487288	0.00428298	0.00437421	0.0044843	0.00441055	0.00399338	0.00443131	0.00474898	0.00334046	0.00358566	0.00328026	0.00592154	0.00319744	0.00436453	0.00267994	0.00197771	0.00437774	0.00404531	0.00266616	0.00274307	0.00535776	0.00100301	0.00426569	0.00232086	0.00190325	0.00244586	0.00219459	0.00268516	0.00350027		0.0018018
	0.00606265	0.00716754	0.00481843	0.00513208	0.00382409	0.00418693	0.0047692	0.00480154	0.00374444	0.00487013	0.00428249	0.00437421	0.0044748	0.00440996	0.00398974	0.00442217	0.00472367	0.0033389	0.00358494	0.00327967	0.00591958	0.00319693	0.00436146	0.00267632	0.00197433	0.00437115	0.00404169	0.00266134	0.00274295	0.00535373	0.001	0.00424757	0.00231823	0.00190086	0.00244499	0.00218955	0.00268199	0.00349718		0.00180018
	0.00606061	0.00715717	0.00480862	0.00512975	0.00381437	0.0041721	0.00476744	0.00477849	0.00374382	0.00486548	0.00428172	0.00437034	0.00446722	0.00440989	0.00398804	0.00442077	0.00472306	0.00333016	0.00358423	0.00327654	0.00590943	0.00319107	0.0043554	0.00267539	0.00196319	0.00436681	0.00403866	0.00265781	0.0027408	0.00534696	0.000999001	0.00420565	0.00231678	0.0018995	0.00244158	0.00218929	0.00268152	0.00348837		0.00180018
	0.00605908	0.00715596	0.00478685	0.00512127	0.00381102	0.00416719	0.0047638	0.00477188	0.00373663	0.00485437	0.00427385	0.00436328	0.00446635	0.00440806	0.00398742	0.00441653	0.00472103	0.00332934	0.00357654	0.00327538	0.00589787	0.00318761	0.00435305	0.0026738	0.00195904	0.00436681	0.00402145	0.00265722	0.00273598	0.00534188	0.000999001	0.00419916	0.00231214	0.00189609	0.00243625	0.00218714	0.00268097	0.00346928		0.00179856
	0.00605362	0.00712611	0.00478602	0.0051126	0.00380793	0.0041644	0.0047619	0.00476029	0.00373134	0.00485325	0.00426894	0.004363	0.00445886	0.00440551	0.0039666	0.00441329	0.00469641	0.00332733	0.00357654	0.00326935	0.00588854	0.0031746	0.00435066	0.00267325	0.00195312	0.00436328	0.00401735	0.00264901	0.00273491	0.00533555	0.000998004	0.00418888	0.00231208	0.00189461	0.00243408	0.00218706	0.00267891	0.00345622		0.00179856
	0.00605347	0.00712251	0.00477707	0.00510774	0.00380286	0.00415184	0.00473934	0.00475573	0.00370148	0.00483927	0.00426223	0.00436205	0.00445021	0.00439635	0.00396415	0.00441112	0.00467532	0.00331966	0.00357569	0.00326797	0.00588428	0.00317357	0.00434106	0.0026687	0.00193852	0.00435587	0.00400802	0.00264271	0.00273224	0.00531915	0.000996016	0.00417457	0.00230548	0.00189394	0.00243309	0.0021865	0.0026759	0.00345477		0.00179856
	0.00605042	0.00711332	0.00477356	0.00509117	0.00380125	0.00415092	0.00473868	0.00475352	0.00369629	0.00483092	0.00426136	0.00436047	0.00445021	0.00438596	0.00396026	0.00440636	0.0046729	0.00330579	0.00357317	0.00326371	0.00588285	0.00316206	0.00434075	0.00266845	0.00193752	0.00435493	0.00400767	0.0026412	0.00273224	0.00531027	0.000993049	0.00416558	0.0023026	0.00189322	0.00243263	0.00217865	0.0026738	0.0034515		0.00179533
	0.00604961	0.00709058	0.00476569	0.00508858	0.00379987	0.00415008	0.0047291	0.00474756	0.00368802	0.00482079	0.00425351	0.00435241	0.00444035	0.00438529	0.00394366	0.00438963	0.00466893	0.00330351	0.0035558	0.00326348	0.00588235	0.00315823	0.00433431	0.00266699	0.0019298	0.00435085	0.00400182	0.00263852	0.00273224	0.00530686	0.000993049	0.00416533	0.00230032	0.00189286	0.00243056	0.00217297	0.00266934	0.00342893		0.00179533
	0.00603789	0.00706614	0.00476065	0.00508801	0.00379667	0.00415002	0.00472185	0.00473118	0.00368249	0.00482033	0.00421391	0.00434923	0.00443063	0.00437693	0.00394064	0.004389	0.00465411	0.00330033	0.00355366	0.00325866	0.00588053	0.00315706	0.00433333	0.00266607	0.00192926	0.00434134	0.00400097	0.00263852	0.00272944	0.0053066	0.000993049	0.00415348	0.00229938	0.00188998	0.00242743	0.00217155	0.00266454	0.0034227		0.00179533
	0.00602905	0.00705844	0.00475683	0.00508704	0.0037885	0.00414938	0.00471476	0.00471063	0.00368016	0.00481808	0.00420139	0.00434783	0.00442129	0.00437589	0.00394046	0.00438757	0.00465297	0.00329308	0.00355287	0.00325733	0.00587969	0.00315611	0.00431862	0.00265957	0.00192543	0.00433811	0.00399779	0.00263687	0.00271985	0.00529977	0.000992063	0.00414164	0.0022958	0.00188841	0.00242679	0.0021692	0.00266193	0.00341807		0.00178891
	0.00601307	0.00705533	0.00475624	0.00507311	0.00378619	0.00414257	0.00470958	0.0047019	0.00366997	0.00479552	0.00420008	0.00434783	0.00441989	0.00434783	0.00393613	0.00438247	0.00465116	0.00329092	0.00354229	0.00325733	0.00587741	0.00315582	0.00430365	0.00265545	0.00191939	0.00433802	0.00398266	0.00263455	0.0027115	0.00529838	0.00099108	0.00413749	0.00229424	0.00188813	0.00242645	0.0021692	0.00266134	0.00339847		0.00178891
	0.00600962	0.00704572	0.0047417	0.00506238	0.00378616	0.00413095	0.00467873	0.00470139	0.00366894	0.00478851	0.00419564	0.00432692	0.00441306	0.00433811	0.00392905	0.00438116	0.00464936	0.00328407	0.00353184	0.00324776	0.00585774	0.00315315	0.00429027	0.00264817	0.00191205	0.00431844	0.003979	0.00263305	0.00270636	0.00528681	0.00098912	0.00413126	0.0022927	0.00188561	0.00242386	0.0021585	0.00265957	0.00339466		0.00178731
	0.0060015	0.00703916	0.00474158	0.00505585	0.00378131	0.00413092	0.00467727	0.00469658	0.00366047	0.00478026	0.00419287	0.00431406	0.00441075	0.00433369	0.0039272	0.00437809	0.00463623	0.00328366	0.00352285	0.00324026	0.00585463	0.00314735	0.00428104	0.0026423	0.00189394	0.00430725	0.00395648	0.00261682	0.00270453	0.00527241	0.000988142	0.00411783	0.002285	0.00188442	0.00242258	0.00215803	0.00265816	0.00338409		0.00178571
	0.00598444	0.00703067	0.00473738	0.00504842	0.0037765	0.00412159	0.00466992	0.00468419	0.00366045	0.00477381	0.00418702	0.00431227	0.00440529	0.00433088	0.00392157	0.00437218	0.00462768	0.0032826	0.00352172	0.00321888	0.00584235	0.00314527	0.00426136	0.0026335	0.00189036	0.00430063	0.00395382	0.00261552	0.00270416	0.00524659	0.000987167	0.0041156	0.00228484	0.00188395	0.00242131	0.00215222	0.002657	0.0033741		0.00178571
	0.00598372	0.00702323	0.00472348	0.00504582	0.00377644	0.0041146	0.00465116	0.00467235	0.00363989	0.00476714	0.00418475	0.00431034	0.00439984	0.004329	0.00392029	0.00435188	0.00462449	0.00327929	0.00351124	0.00321826	0.00581959	0.00314056	0.0042471	0.00263158	0.00188679	0.00429923	0.00395369	0.00261531	0.0027027	0.00524476	0.000987167	0.00409865	0.00227926	0.00187931	0.00242131	0.00214477	0.00265428	0.00334262		0.00177936
	0.00597815	0.00700637	0.0047196	0.00503507	0.00377633	0.00411189	0.00464396	0.00467047	0.00362582	0.00476474	0.0041806	0.00431034	0.00439902	0.00430866	0.00391313	0.00434873	0.00462161	0.00327869	0.00349922	0.00320821	0.00581096	0.0031395	0.00422603	0.00263158	0.00187422	0.00429738	0.00395189	0.00261498	0.00269687	0.00522575	0.000985222	0.00409091	0.00227716	0.00187842	0.00242131	0.00214056	0.00265252	0.00330536		0.00177936
	0.00597695	0.00699301	0.00471505	0.00502793	0.00377551	0.00410678	0.00464037	0.00466045	0.00362388	0.00475334	0.0041738	0.00430321	0.0043956	0.00430192	0.00391156	0.00434705	0.00461409	0.00326028	0.0034965	0.00320736	0.00578035	0.00313152	0.00421179	0.00263071	0.00185953	0.00429316	0.00394685	0.00261139	0.00269542	0.00521953	0.000985222	0.00408704	0.0022748	0.00187637	0.00241608	0.00214047	0.00265018	0.00328299		0.0017762
	0.00597372	0.00696997	0.00470739	0.00502559	0.0037746	0.00410256	0.0046332	0.00465387	0.003622	0.00471204	0.00414582	0.00429588	0.00439009	0.00430148	0.00389267	0.00433767	0.00460678	0.00325851	0.0034965	0.00320256	0.00578035	0.00313018	0.00419713	0.00262985	0.00183916	0.00429185	0.00394218	0.00261097	0.00269542	0.00521739	0.000985222	0.00408618	0.00227467	0.00187467	0.00241572	0.00214031	0.00264725	0.00327679		0.0017762
	0.00596792	0.0069646	0.0047055	0.00500751	0.00376705	0.00407407	0.00462677	0.00465116	0.00361653	0.00470418	0.00414365	0.00429514	0.00438783	0.00429855	0.0038921	0.00433712	0.00460476	0.00325118	0.00349399	0.00319953	0.00576752	0.00312356	0.0041876	0.00262812	0.00183824	0.00428342	0.00393456	0.00260078	0.00269058	0.00520116	0.000985222	0.00407558	0.00227028	0.00187324	0.00241546	0.00213936	0.00263455	0.00327478		0.00177462
	0.00596792	0.00696008	0.00470231	0.00500125	0.00375876	0.0040633	0.00461437	0.00463627	0.00361272	0.00469252	0.00414079	0.0042735	0.00437416	0.00429681	0.00388979	0.00433622	0.00458524	0.00325098	0.0034904	0.00319567	0.00575916	0.003122	0.00418313	0.00262381	0.00183262	0.00427533	0.00393391	0.00259067	0.00268817	0.00519481	0.000983284	0.00406971	0.00226693	0.00186654	0.00241525	0.00213346	0.00263112	0.00327466		0.00174825
	0.00596172	0.00694981	0.00470219	0.00499643	0.00375587	0.00404585	0.00461302	0.00462963	0.00358637	0.0046875	0.00413793	0.00426338	0.00437132	0.00428082	0.00387286	0.00433276	0.00458505	0.00325071	0.00348789	0.00318561	0.0057554	0.00311804	0.00417324	0.00262357	0.00181269	0.00427386	0.00391596	0.00258287	0.00268817	0.00518263	0.000982318	0.00406618	0.00226111	0.00186407	0.00241458	0.00213295	0.00262973	0.00327022		0.0017452
	0.0059585	0.00694532	0.00470219	0.00498594	0.0037458	0.00402108	0.00460678	0.00462161	0.00358073	0.00467997	0.00412538	0.00425913	0.00437105	0.00428047	0.00386432	0.00432969	0.00457491	0.00324333	0.00348736	0.00317404	0.00575185	0.00311778	0.00416419	0.00261461	0.00180995	0.00426673	0.00390756	0.00258219	0.00268727	0.00518056	0.000981354	0.00406174	0.00225969	0.00186047	0.00241281	0.00213106	0.00262927	0.00325733		0.00174216
	0.00595576	0.00694519	0.00469484	0.00498306	0.00374208	0.00401606	0.00460645	0.00461985	0.00357873	0.0046729	0.00412223	0.00425532	0.00436294	0.0042716	0.00386028	0.004329	0.00457481	0.00324259	0.00347464	0.00316742	0.00575043	0.00310337	0.00415913	0.002614	0.00180832	0.00425834	0.0038963	0.00257991	0.00268384	0.0051799	0.000980392	0.00405792	0.00225887	0.00185874	0.00241114	0.00212917	0.00262697	0.00325048		0.00174064
	0.00595389	0.00694252	0.00468933	0.00498031	0.00373808	0.00401352	0.0045977	0.00461731	0.00357831	0.00466378	0.004111	0.00425242	0.0043442	0.00427008	0.00385888	0.00430777	0.00455878	0.00324074	0.00347432	0.0031598	0.00574426	0.00309872	0.00414079	0.00261393	0.00180832	0.0042523	0.00388574	0.00257579	0.00267809	0.00517647	0.000980392	0.0040507	0.00225008	0.00185157	0.00240825	0.0021285	0.00262573	0.00324445		0.00173913
	0.00594732	0.00688948	0.00468779	0.00497358	0.00373501	0.00400802	0.00458177	0.00461621	0.00357665	0.00466313	0.00411092	0.00423729	0.00433784	0.00427003	0.00384047	0.00430663	0.0045489	0.00323665	0.00347222	0.0031559	0.00573554	0.00309657	0.00413355	0.00261301	0.00178571	0.00424528	0.00387597	0.0025737	0.00267648	0.00516585	0.000980392	0.00403393	0.00224944	0.001849	0.00240385	0.00212802	0.00262467	0.00323276		0.00173913
	0.0059415	0.00688211	0.00467775	0.00496454	0.00373076	0.0040031	0.00457952	0.00461589	0.00357501	0.00465813	0.00409906	0.00423462	0.00433526	0.00424729	0.00382958	0.00430444	0.00452861	0.00323625	0.00346771	0.00315143	0.00573394	0.0030945	0.0041269	0.00261097	0.00177305	0.00424448	0.00386942	0.00256726	0.00267419	0.00514684	0.000979432	0.00402464	0.00224845	0.00184745	0.00239877	0.00212675	0.00261837	0.00322711		0.00173611
	0.00593903	0.00687952	0.00466372	0.00495841	0.00371422	0.00398945	0.00457666	0.00460829	0.00357143	0.00465357	0.00409659	0.00423131	0.00433437	0.00424371	0.00382653	0.00430071	0.0045185	0.00323244	0.0034638	0.00313191	0.00572869	0.00309005	0.00412201	0.00260107	0.00177279	0.00423643	0.0038674	0.00256279	0.00266785	0.00514648	0.000979432	0.00402145	0.00224797	0.00184651	0.00239736	0.00212404	0.00261584	0.00321543		0.00172414
	0.00593765	0.00687191	0.00465649	0.00495392	0.00371393	0.00398936	0.00457362	0.0046061	0.00357091	0.00465178	0.00409493	0.00418449	0.00433135	0.00423729	0.00382444	0.00428082	0.0045057	0.00323232	0.00345295	0.00312989	0.00572082	0.00307963	0.00412182	0.0026001	0.00174216	0.00423027	0.003861	0.00255831	0.00266667	0.005135	0.000979432	0.00401875	0.00224669	0.00184536	0.00239071	0.00212212	0.00261523	0.00321089		0.00171233
	0.00591856	0.00682542	0.0046551	0.00495249	0.00371322	0.00398828	0.0045677	0.00460059	0.00356397	0.00465116	0.00409392	0.00418366	0.00433135	0.0042343	0.00382082	0.00427565	0.00449186	0.00322928	0.00345181	0.0031277	0.0057177	0.00307882	0.00411994	0.00259815	0.00174216	0.00422022	0.003861	0.00255718	0.00266667	0.00511073	0.000978474	0.00401127	0.0022458	0.00184502	0.00238826	0.00211696	0.002614	0.0032088		0.00171233
	0.00591716	0.00681451	0.00465399	0.00494485	0.00370947	0.00398633	0.00455259	0.00459374	0.00356075	0.00465059	0.0040894	0.00418243	0.00432633	0.00423261	0.00380228	0.0042714	0.00448934	0.00322148	0.00344866	0.00312598	0.00570613	0.00307598	0.00411932	0.0025974	0.00173822	0.00421585	0.00385614	0.0025545	0.00266667	0.00510357	0.000978474	0.00400605	0.00224503	0.00184468	0.00238826	0.00211622	0.00260983	0.00320712		0.00170648
	0.00590667	0.00679309	0.00465287	0.00494186	0.00370508	0.00397675	0.00455235	0.00457413	0.00355527	0.00465022	0.00408497	0.00418027	0.00432588	0.00423071	0.00379327	0.00427019	0.00447761	0.00321909	0.0034463	0.00312556	0.00570404	0.00307245	0.00411585	0.00259202	0.00173451	0.00420704	0.00385089	0.00255174	0.00266525	0.00509461	0.000976562	0.004004	0.00224417	0.00184438	0.00237859	0.00211441	0.00260489	0.00320513		0.00170358
	0.00589971	0.00677201	0.00463714	0.00494083	0.00370413	0.00397614	0.00454403	0.00455456	0.00354946	0.00464992	0.00405017	0.00417595	0.00432181	0.00421867	0.00377659	0.004266	0.00447036	0.00321773	0.00343306	0.00311712	0.00569476	0.0030656	0.00411523	0.00259186	0.00173182	0.00420592	0.0038468	0.00255102	0.00265957	0.00508906	0.000974659	0.00395457	0.00224072	0.00184291	0.00237671	0.00211342	0.0026032	0.00319285		0.00170068
	0.00589722	0.00676861	0.00463092	0.00492376	0.00370105	0.00396825	0.00454133	0.00453274	0.00354853	0.00464037	0.00404759	0.0041686	0.00431499	0.00421168	0.0037743	0.00426473	0.00446122	0.00321744	0.00343014	0.0031116	0.00568003	0.00306106	0.00411417	0.00258621	0.00172592	0.00420521	0.00384304	0.00254669	0.00265957	0.00508714	0.00097371	0.00392413	0.00223647	0.00184149	0.0023753	0.00211305	0.00260304	0.00318525		0.00168919
	0.00589391	0.00674559	0.0046262	0.00489663	0.00369973	0.00396825	0.00453918	0.00450938	0.00354684	0.00463269	0.00404585	0.00416272	0.00431448	0.00421053	0.00376884	0.00426183	0.0044596	0.00321074	0.00341609	0.00310505	0.00566572	0.00305681	0.00409836	0.00258157	0.00172563	0.00420168	0.00383877	0.00254534	0.00265816	0.00504505	0.000970874	0.00392082	0.00223239	0.00184077	0.00237449	0.00211132	0.00260126	0.0031614		0.00167785
	0.00588988	0.00673524	0.00461423	0.0048951	0.00369783	0.00396319	0.00453296	0.00450539	0.00354649	0.00461484	0.00404157	0.0041483	0.0043107	0.00420484	0.00376356	0.0042618	0.00445434	0.00320024	0.0034153	0.0031028	0.00564898	0.00304859	0.00408719	0.00258065	0.00172265	0.00419948	0.00383457	0.00254453	0.00265428	0.00504169	0.000970874	0.00390625	0.00222982	0.00184077	0.00237313	0.0021097	0.00260078	0.00311617		0.00166389
	0.00588102	0.00673035	0.00461296	0.00489304	0.00369393	0.00395501	0.00453172	0.00449398	0.00353982	0.00461113	0.00403633	0.0041481	0.00430622	0.0042044	0.00375822	0.00425758	0.0044531	0.00318066	0.0034137	0.0030973	0.00562364	0.0030477	0.00407609	0.00257732	0.00171821	0.00418702	0.00382916	0.00253165	0.00265252	0.00503543	0.000970874	0.00390209	0.002228	0.00184017	0.00237217	0.00209293	0.00259986	0.00311163		0.00166113
	0.00587921	0.00673007	0.00460829	0.00487149	0.00368953	0.00393789	0.00451632	0.00449116	0.00353938	0.00459225	0.00403551	0.00414495	0.00430622	0.00419761	0.00375657	0.00425532	0.00443459	0.00317712	0.00340069	0.00309209	0.00560911	0.00303361	0.00406438	0.00256284	0.00171527	0.00417101	0.00382589	0.00252972	0.00264317	0.00503303	0.000963391	0.00390016	0.00222651	0.00183739	0.00237127	0.0020908	0.00259853	0.00310816		0.00165837
	0.00587422	0.00672542	0.00460476	0.00487092	0.00368732	0.00391773	0.00451518	0.00448648	0.0035246	0.00459202	0.00402202	0.00412567	0.00430466	0.00419463	0.00375421	0.00425532	0.00443213	0.00317561	0.00339943	0.00308063	0.00557103	0.00303337	0.00406268	0.00255754	0.00170882	0.00415846	0.00381709	0.00252701	0.00264251	0.00502884	0.000962464	0.00389394	0.00222432	0.00183524	0.00236842	0.00208297	0.0025974	0.00309239		0.00165289
	0.00587372	0.00671539	0.00460193	0.00486855	0.00368626	0.00391707	0.00450611	0.00446862	0.00352361	0.00458091	0.00401973	0.00412229	0.00429588	0.00419287	0.0037339	0.00423872	0.00442043	0.00316397	0.00339751	0.00307587	0.0055585	0.00302637	0.00405631	0.00255571	0.00170815	0.00415714	0.00380952	0.00251446	0.00264131	0.0050281	0.000961538	0.0038901	0.00222108	0.00183486	0.00236686	0.00208271	0.0025974	0.00308008		0.00163934
	0.00586854	0.00671077	0.00459894	0.00486787	0.00368249	0.00390625	0.00448486	0.00446791	0.00352237	0.00457962	0.00401674	0.00412088	0.00428944	0.00418936	0.00369646	0.0042328	0.00441664	0.00315994	0.00337553	0.0030742	0.00555793	0.00302572	0.00405405	0.002555	0.00170576	0.00414735	0.00379867	0.00251147	0.00263678	0.00501792	0.000959693	0.00388903	0.00221905	0.0018315	0.00236653	0.00207541	0.00259665	0.00307125		0.00163399
	0.00586725	0.00670849	0.00458716	0.00485529	0.00367844	0.00390312	0.00448207	0.00446791	0.00351803	0.00457803	0.00401606	0.00410834	0.00428604	0.00417319	0.0036914	0.00423208	0.00441543	0.00315457	0.003367	0.00307113	0.00555556	0.00302487	0.00405028	0.00255428	0.00170068	0.00413864	0.0037986	0.00250662	0.00263644	0.00498753	0.000959693	0.00388664	0.0022178	0.0018315	0.00236217	0.00207023	0.00259618	0.00305074		0.00163399
	0.0058642	0.00669942	0.00458155	0.00485108	0.00366798	0.00390233	0.00448065	0.00445876	0.00351589	0.0045755	0.00400094	0.00410708	0.00428135	0.00417178	0.00369004	0.00422565	0.00438212	0.00314515	0.00336061	0.00307018	0.00554201	0.00300725	0.00404245	0.00253928	0.00170068	0.00413834	0.00379417	0.00250553	0.00263257	0.00498367	0.000958773	0.003885	0.00221718	0.00182974	0.00235902	0.00207021	0.00259471	0.00302855		0.00163132
	0.00585885	0.00669643	0.00457267	0.00484894	0.00366197	0.00389127	0.00447481	0.00445789	0.00351083	0.00457317	0.0039984	0.0041041	0.00427738	0.00416217	0.00368615	0.00421941	0.00437318	0.00314268	0.00335846	0.00306748	0.00552486	0.002999	0.00403112	0.00253807	0.00169779	0.00413223	0.00378788	0.00250352	0.00263158	0.00497088	0.000956938	0.00388216	0.00221417	0.00182451	0.00235809	0.00207013	0.00259202	0.00299796		0.00163132
	0.00584097	0.00669594	0.00457085	0.00484555	0.00366133	0.00389105	0.00447427	0.00445137	0.00350972	0.00455927	0.00397784	0.00409707	0.00427548	0.00414903	0.00367422	0.00421206	0.00437227	0.00314199	0.00335726	0.00306706	0.00552127	0.00299722	0.00402477	0.00253281	0.00169492	0.00413223	0.00378174	0.00250209	0.0026253	0.00496975	0.000951475	0.00387995	0.00220976	0.0018196	0.00235496	0.00206932	0.00259067	0.00298864		0.00163132
	0.00584019	0.00666275	0.00457007	0.0048376	0.00365488	0.00389105	0.00447036	0.00444534	0.00349891	0.00455345	0.00396913	0.00409232	0.00426406	0.00414774	0.00367107	0.00420797	0.00436906	0.0031355	0.00335172	0.00306673	0.00551863	0.00299434	0.00400672	0.00252525	0.00169205	0.00411825	0.00378142	0.00249844	0.00262398	0.0049635	0.000949668	0.00387404	0.00220894	0.00181818	0.00235294	0.00206398	0.00258844	0.00298826		0.00162866
	0.00583009	0.00664972	0.00456168	0.00481996	0.00365066	0.00388425	0.00446429	0.00443094	0.00348874	0.00454545	0.00396825	0.00408372	0.0042588	0.00412913	0.00367075	0.00420168	0.0043684	0.00312898	0.00335008	0.00306452	0.00551724	0.00299401	0.00400123	0.00252161	0.00168853	0.00410678	0.00377673	0.00249299	0.00262295	0.00494836	0.000949668	0.00385386	0.00220848	0.00181598	0.0023511	0.00206301	0.00258799	0.00298507		0.00162338
	0.00582902	0.00664894	0.00455408	0.00481968	0.00364821	0.0038835	0.00445728	0.00441322	0.00348322	0.00454054	0.00395778	0.00408339	0.00423629	0.00412774	0.0036694	0.00419687	0.00434783	0.00312744	0.0033475	0.00305904	0.00550585	0.00299252	0.00398687	0.00252016	0.00168824	0.00410284	0.00377358	0.00249252	0.00260824	0.00494604	0.000948767	0.0038373	0.00220629	0.00181384	0.00234718	0.00205822	0.00258732	0.00298418		0.00161031
	0.00582886	0.00659794	0.00455125	0.00480885	0.0036435	0.0038827	0.00444727	0.00441272	0.0034825	0.00453738	0.00395704	0.00407216	0.00422386	0.00411603	0.00365854	0.00419393	0.00434657	0.00312012	0.00334747	0.00305851	0.00550459	0.00299145	0.00396894	0.00251942	0.00168634	0.00410107	0.00376884	0.00249211	0.0026032	0.00493378	0.000947867	0.00383203	0.00220618	0.00181094	0.00234066	0.0020562	0.00258465	0.00296296		0.00160772
	0.0058273	0.00658979	0.0045511	0.00480769	0.00363428	0.00388098	0.00443787	0.00440063	0.00348129	0.00452989	0.00394645	0.00405669	0.00419287	0.00409531	0.00365364	0.00419143	0.00433944	0.0031185	0.0033464	0.00305473	0.0054973	0.00298977	0.00396825	0.00251889	0.00167997	0.0040932	0.00376712	0.00249169	0.00260247	0.00493182	0.000946074	0.00381786	0.00220349	0.00180914	0.00233918	0.00205528	0.00258342	0.00296017		0.0016
	0.00582666	0.00657194	0.00454452	0.00480701	0.003626	0.00387847	0.00442768	0.00439984	0.00347293	0.00452745	0.0039454	0.00405374	0.00419141	0.00408476	0.00364133	0.00419068	0.00433498	0.00311526	0.00334242	0.00305033	0.00549451	0.00298452	0.00396825	0.00251805	0.00167364	0.00409172	0.00375215	0.00248925	0.00260146	0.00493097	0.000946074	0.00380228	0.00220313	0.00180636	0.00233402	0.00205218	0.00258065	0.00294482		0.0016
	0.00582273	0.00655824	0.00453621	0.0047993	0.00362495	0.00387168	0.00442478	0.00439486	0.00347222	0.00452489	0.00394308	0.00404858	0.00417867	0.00406614	0.00363864	0.00418235	0.00431034	0.00311383	0.00333651	0.00303357	0.00548768	0.00297151	0.00396476	0.00251493	0.00166752	0.00409062	0.00375056	0.00248098	0.00259853	0.00492207	0.00094518	0.00379924	0.00219706	0.00180522	0.00233351	0.00205102	0.00257898	0.00293858		0.00159744
	0.00582269	0.00653759	0.00453143	0.00479193	0.00362376	0.00386225	0.00442478	0.00438276	0.00345973	0.00451854	0.00393391	0.00404391	0.00417558	0.00406198	0.00363224	0.00418118	0.00429272	0.00310078	0.00333472	0.00303214	0.00547722	0.00296684	0.00395533	0.00251256	0.001665	0.00408762	0.00374532	0.00248036	0.00259628	0.00490196	0.00094518	0.00379545	0.0021961	0.00180353	0.00233325	0.00205044	0.00257448	0.00293367		0.00159236
	0.00581703	0.00653061	0.0045312	0.00479143	0.00362237	0.003861	0.00441151	0.0043802	0.00345727	0.00451794	0.00393052	0.00404302	0.00417385	0.00406102	0.00361585	0.00417711	0.00426509	0.00309917	0.00333148	0.0030303	0.00547445	0.00296338	0.00393895	0.00250627	0.00164682	0.00408556	0.00373413	0.00247977	0.00259336	0.00489556	0.000943396	0.0037873	0.00219138	0.00180221	0.00232952	0.00204918	0.002574	0.00291616		0.00157729
	0.00581129	0.00651005	0.00453107	0.00478998	0.00362073	0.00384123	0.00440714	0.00437905	0.00345672	0.00450763	0.00391595	0.00404245	0.00417293	0.00405789	0.00360696	0.00415172	0.0042523	0.00308596	0.00333056	0.00302978	0.00546957	0.00296296	0.00393761	0.00250627	0.00164271	0.00406736	0.00372386	0.00247601	0.00259067	0.00489556	0.000940734	0.0037843	0.0021871	0.00179949	0.00232799	0.00204798	0.00257299	0.00291545		0.00156986
	0.00578969	0.00650482	0.00452745	0.00478738	0.00361979	0.00383368	0.00440335	0.00437752	0.00345524	0.00450632	0.00391191	0.00403282	0.00417101	0.004046	0.00360668	0.00415122	0.0042381	0.00308325	0.00332624	0.00302435	0.00546915	0.00296248	0.00392259	0.00250627	0.00164002	0.00406137	0.00372247	0.00247219	0.00258799	0.00488475	0.000938967	0.00378327	0.00218214	0.0017965	0.00232739	0.00204708	0.00257069	0.00291343		0.0015674
	0.00578739	0.00649663	0.00452131	0.00478543	0.00360815	0.00383282	0.00440055	0.00437346	0.00344075	0.0045045	0.00390778	0.00402414	0.00416435	0.00403814	0.00360447	0.0041511	0.0042349	0.00307915	0.00332534	0.00301508	0.00545418	0.00295069	0.00390795	0.0025055	0.00163399	0.00405704	0.00370599	0.00246407	0.00258732	0.00487106	0.000938086	0.00377003	0.00218048	0.00179533	0.00232342	0.00204651	0.0025641	0.00290621		0.00156006
	0.00578302	0.00649351	0.00451521	0.00477666	0.00360231	0.00383255	0.00439611	0.00436954	0.00343949	0.00450387	0.00390666	0.00401437	0.00415595	0.00402828	0.00359772	0.00414723	0.00422932	0.00307102	0.0033195	0.00301104	0.0054442	0.0029496	0.00389105	0.00250156	0.00162778	0.00404787	0.00369004	0.00246219	0.00258303	0.00486743	0.000937207	0.00376884	0.00217865	0.00179211	0.00232243	0.00204638	0.00256337	0.00290503		0.0015456
	0.00578146	0.00649277	0.0044918	0.00475828	0.00359826	0.00382723	0.00438659	0.00435941	0.00343643	0.00449964	0.00390384	0.0040132	0.00414079	0.00401606	0.00359335	0.00414412	0.0042278	0.00306346	0.00330737	0.00300464	0.00544366	0.00294937	0.00388457	0.00249606	0.0016225	0.00404373	0.00368533	0.002457	0.00258264	0.00485861	0.000934579	0.00376599	0.00217746	0.00179166	0.00232019	0.00204638	0.00255601	0.00290276		0.00152672
	0.00577838	0.00648327	0.0044843	0.00475791	0.00359746	0.00382653	0.00437784	0.00435602	0.00343591	0.00449388	0.00390144	0.00398724	0.00413845	0.00401434	0.00357782	0.00414334	0.00422465	0.00306062	0.00330607	0.00300064	0.00542888	0.00294619	0.00388433	0.00249377	0.0016225	0.00404008	0.00368265	0.0024502	0.00257235	0.00482825	0.000933707	0.00376569	0.00216886	0.00179124	0.00231911	0.00204315	0.00255102	0.00289052		0.00152672
	0.00576992	0.0064601	0.00448207	0.0047541	0.00359742	0.00381316	0.004375	0.0043554	0.0034338	0.00448522	0.00389813	0.0039784	0.00413716	0.00401223	0.00357309	0.00412957	0.00420589	0.00305623	0.00330119	0.00299778	0.00542888	0.00294118	0.00386897	0.00249221	0.00162075	0.00403956	0.00367647	0.00244898	0.00257202	0.00482625	0.000926784	0.00374883	0.00216881	0.0017912	0.00231696	0.00204165	0.00255102	0.00288701		0.00152672
	0.00576891	0.00645624	0.00448008	0.00475162	0.00359404	0.00381275	0.00436267	0.00435127	0.00343155	0.00448008	0.00389267	0.00397614	0.0041335	0.00400246	0.00356961	0.00412778	0.00417495	0.00305603	0.00329976	0.0029877	0.0054254	0.00292866	0.0038626	0.00249151	0.00162075	0.00403836	0.00367478	0.00244499	0.00257069	0.00481965	0.000925069	0.00373812	0.00216606	0.00178856	0.0023144	0.00204052	0.00254823	0.002886		0.00152439
	0.00575926	0.00642497	0.00447427	0.00474752	0.00358423	0.00381162	0.0043618	0.00435053	0.00342486	0.00446798	0.00388619	0.00397562	0.00412306	0.004	0.00356278	0.00412655	0.00416493	0.00304878	0.00329918	0.00298686	0.00542255	0.00292826	0.00386191	0.00248251	0.00161865	0.00403163	0.0036678	0.00244444	0.00257069	0.00481295	0.000924214	0.00373367	0.00216362	0.00178625	0.00231065	0.00203915	0.00254669	0.00288541		0.00152439
	0.00575816	0.00641172	0.00447217	0.00473513	0.00357498	0.00380339	0.0043554	0.00434783	0.00342114	0.00446429	0.00388423	0.00397251	0.00411677	0.00399791	0.00355999	0.00411341	0.00415417	0.0030426	0.00328998	0.00298317	0.00541883	0.00292585	0.00384952	0.00247525	0.00159744	0.00402769	0.00366771	0.00243853	0.00256881	0.0048	0.000919963	0.00371012	0.00215983	0.00178155	0.00230916	0.00203892	0.00253928	0.00288236		0.00151745
	0.00575758	0.00640732	0.00446999	0.00472964	0.00357474	0.00380339	0.00434363	0.00433996	0.00341997	0.0044596	0.00387597	0.0039501	0.00411477	0.00399756	0.00355872	0.00410557	0.00414723	0.00304044	0.00324564	0.00298211	0.00541272	0.00292583	0.0038468	0.00246827	0.00159744	0.00401929	0.00365965	0.00243616	0.00256246	0.00479057	0.000911577	0.00369686	0.00215983	0.00178026	0.00230415	0.00203517	0.00253807	0.00286841		0.00151745
	0.00575043	0.00640205	0.00445979	0.00472943	0.00357143	0.00379307	0.00433984	0.00433135	0.00340136	0.00444609	0.00387222	0.00393701	0.004111	0.00398406	0.00355366	0.00409883	0.0041425	0.0030303	0.00322749	0.0029615	0.00541209	0.00292125	0.00384025	0.00246575	0.00158407	0.00401841	0.00363442	0.00243605	0.00255918	0.00478065	0.000909091	0.00369137	0.00215517	0.00178006	0.00230263	0.00203417	0.00253378	0.00285646		0.00149254
	0.00573671	0.00638706	0.00445948	0.00472547	0.00356937	0.00379057	0.0043343	0.0043273	0.00339784	0.00444313	0.00387212	0.00392465	0.004109	0.00396432	0.00355207	0.00409229	0.00413223	0.00301714	0.00321888	0.00295082	0.0054099	0.00290958	0.00383683	0.00246002	0.00157871	0.00401768	0.00363248	0.00243178	0.00255537	0.00477707	0.000908265	0.00368664	0.00215285	0.00177778	0.00230187	0.0020328	0.0025325	0.0028557		0.00149031
	0.00573549	0.00635209	0.00445745	0.00471524	0.00356644	0.00378726	0.00433317	0.00432173	0.00339271	0.00443599	0.0038679	0.0039103	0.00410416	0.00394668	0.0035503	0.00409015	0.00411281	0.0030134	0.00321875	0.00294811	0.00540054	0.00290867	0.00383632	0.00244499	0.00156849	0.0040146	0.0036308	0.00242645	0.00255537	0.00477502	0.000906618	0.00368276	0.00215285	0.00177405	0.00229837	0.00202317	0.00252951	0.00285139		0.0014881
	0.00573301	0.00633641	0.00445286	0.00471118	0.00355437	0.00377715	0.004329	0.00432113	0.00339103	0.00443016	0.00385961	0.00389105	0.0041001	0.00394359	0.0035461	0.00408508	0.00410678	0.00300661	0.0032175	0.00294638	0.00539137	0.00289122	0.00382913	0.00244243	0.0015674	0.00399794	0.00362996	0.00242645	0.00255428	0.00477281	0.000903342	0.00367782	0.00215142	0.00177335	0.0022981	0.00201911	0.00252951	0.00284968		0.00148588
	0.0057241	0.00633102	0.00444341	0.0047105	0.0035527	0.00377644	0.00432856	0.00431499	0.00337154	0.00442308	0.0038432	0.00388889	0.00409802	0.00393701	0.0035447	0.00407599	0.00409244	0.00300445	0.00321677	0.00294623	0.00539084	0.0028893	0.00381098	0.00243686	0.00155763	0.00399734	0.00362231	0.00242451	0.00255232	0.00477099	0.000893655	0.0036777	0.00214552	0.00177242	0.00229555	0.00201875	0.0025289	0.0028485		0.00148588
	0.00572276	0.00630967	0.00443295	0.0047045	0.00355247	0.00377426	0.00431267	0.00431034	0.003367	0.00440728	0.00383651	0.00388705	0.00409676	0.00393462	0.00353357	0.00407487	0.00408163	0.003003	0.00321673	0.00294454	0.00535264	0.00288554	0.00380711	0.00243309	0.0015559	0.00399645	0.00361839	0.00241857	0.00254582	0.00477027	0.000893655	0.00367478	0.0021449	0.00176958	0.00229489	0.0020183	0.00252845	0.00282885		0.00148588
	0.00571429	0.00629181	0.00442184	0.00469786	0.00355094	0.00377225	0.00431189	0.00430293	0.00336559	0.00440529	0.00383289	0.00386507	0.00409024	0.00392817	0.0035249	0.00407268	0.00408088	0.00299925	0.00321081	0.00294166	0.0053515	0.00287678	0.00380228	0.00243161	0.00155009	0.00398618	0.00361679	0.00241818	0.00254561	0.00476668	0.000892061	0.00366748	0.00214347	0.00176678	0.00229479	0.0020155	0.00252781	0.00282366		0.00148588
	0.00570776	0.00628852	0.00441871	0.00469116	0.00353843	0.00377206	0.00430802	0.00428082	0.00335946	0.0044023	0.00383212	0.00386326	0.00408958	0.00392491	0.00351906	0.00407178	0.00405954	0.0029959	0.00321076	0.00294118	0.00535028	0.00287162	0.00380228	0.00242929	0.00154083	0.00398406	0.00360815	0.00241352	0.00254453	0.00476087	0.000887311	0.00366133	0.00214014	0.00176367	0.00229008	0.00201342	0.00252738	0.00282345		0.00148588
	0.00570478	0.00628536	0.0044186	0.00469009	0.0035347	0.00376344	0.00430617	0.00427572	0.00335161	0.00439883	0.0038286	0.00385802	0.00408789	0.00391625	0.00351636	0.00406279	0.00405132	0.00299401	0.00320856	0.00293932	0.00533144	0.00286944	0.00379651	0.00242131	0.0015382	0.00398118	0.0035868	0.00241138	0.00254345	0.00475098	0.000874126	0.00365297	0.00213904	0.00176305	0.00228925	0.00201248	0.00252708	0.00279871		0.00147929
	0.00570342	0.00627709	0.00441176	0.00468647	0.00353248	0.00376028	0.00430226	0.0042735	0.00334514	0.00439872	0.0038214	0.00385299	0.00407911	0.00391604	0.00351151	0.00405651	0.00404654	0.00298576	0.00320256	0.00293032	0.00531277	0.00286659	0.0037947	0.00241935	0.0015358	0.0039801	0.00358045	0.00241138	0.00254323	0.00474898	0.0008726	0.00363636	0.00213561	0.00176211	0.00228484	0.00201207	0.00252525	0.00279827		0.00146628
	0.0056866	0.00627684	0.00440933	0.00468384	0.0035246	0.00373732	0.00430127	0.0042709	0.0033391	0.00439831	0.00382108	0.00384615	0.00407277	0.00391181	0.00351124	0.00405572	0.00404546	0.00298139	0.00319736	0.00292276	0.0053027	0.00286104	0.00379215	0.00241657	0.00153248	0.00396891	0.00357264	0.00240844	0.00254237	0.00474453	0.000869565	0.00363214	0.00213514	0.00176118	0.00228087	0.00201207	0.00252446	0.0027933		0.00145349
	0.00567465	0.00627119	0.00439932	0.00468274	0.00352309	0.00373692	0.00429767	0.00426649	0.00333873	0.00439754	0.00381783	0.00383583	0.00405797	0.00391032	0.00350549	0.00405405	0.00404115	0.00298107	0.0031864	0.00291715	0.00529723	0.00285495	0.00379147	0.00241546	0.00153139	0.00396825	0.00357249	0.00240819	0.00252845	0.00473513	0.000866551	0.00363108	0.00212491	0.00175644	0.00227762	0.00200232	0.00251889	0.00279123		0.00143988
	0.00566819	0.00625404	0.00437658	0.00466708	0.00352113	0.00373514	0.00429688	0.00425532	0.00333519	0.00439595	0.00380771	0.00382697	0.00405484	0.00390335	0.00349854	0.00404858	0.00401606	0.00297746	0.00317909	0.00291545	0.00529381	0.00284819	0.0037886	0.00240853	0.00152629	0.00395984	0.00355872	0.00239751	0.00252653	0.00473485	0.000865801	0.00362783	0.00212437	0.00175439	0.00227735	0.00200133	0.00251889	0.00277815		0.00143062
	0.00566572	0.00624566	0.00437637	0.00466045	0.00352015	0.00372439	0.00428673	0.00425407	0.00331593	0.00437673	0.00379696	0.00382217	0.00404233	0.00389016	0.00349825	0.00404722	0.00400572	0.00297619	0.0031728	0.00291505	0.00529234	0.00284186	0.0037877	0.00240648	0.00152091	0.00394844	0.00355082	0.00239449	0.00252525	0.00473279	0.000865052	0.00360577	0.00212314	0.00175439	0.00227583	0.002001	0.00251708	0.00277393		0.00141643
	0.00566572	0.00622677	0.00437482	0.00464981	0.00352	0.00372159	0.00428614	0.00425331	0.00331492	0.00437507	0.00379404	0.00380865	0.00403992	0.00388812	0.00349108	0.00404449	0.00398089	0.00297564	0.00316957	0.00290909	0.00527976	0.00283798	0.00377766	0.00240457	0.00151745	0.00394523	0.00354707	0.00238949	0.00251889	0.00473138	0.000863558	0.00359742	0.00211808	0.00175395	0.0022748	0.002	0.00251678	0.00277264		0.00141243
	0.00564972	0.00621977	0.00436562	0.00464807	0.00351617	0.00371517	0.00428397	0.00425287	0.00330937	0.004365	0.00378999	0.00379816	0.00403633	0.00388199	0.00349096	0.00403966	0.00397686	0.00297508	0.00316905	0.00290449	0.00527426	0.00283688	0.00377209	0.0024	0.00150331	0.00394132	0.00354411	0.00238612	0.00251889	0.0047299	0.000862069	0.00357569	0.0021177	0.0017537	0.00227472	0.001999	0.00251651	0.00275862		0.00141243
	0.00564236	0.00621633	0.00436443	0.00463679	0.00350447	0.00371306	0.00427996	0.00425285	0.00330442	0.004363	0.00377913	0.0037921	0.00402352	0.00387993	0.00348828	0.00403805	0.00396301	0.0029703	0.00314982	0.00289663	0.00527072	0.00283617	0.00376168	0.00239775	0.0015015	0.0039356	0.00353357	0.00238493	0.00251467	0.00472973	0.000861326	0.00356443	0.00211589	0.00175316	0.00227301	0.00199612	0.00251145	0.00274767		0.00141044
	0.00563595	0.00620097	0.0043592	0.00462774	0.00350365	0.00371287	0.00427621	0.00424062	0.00330295	0.00435844	0.00375744	0.00376412	0.00402095	0.0038708	0.00348129	0.00403551	0.00396254	0.00296956	0.00314017	0.0028954	0.00525502	0.00283554	0.00373909	0.00239398	0.00148865	0.00393479	0.00352334	0.00238344	0.00251346	0.00471328	0.000853971	0.00355661	0.00211528	0.00175234	0.0022724	0.00199601	0.00251054	0.00274725		0.00141044
	0.00563063	0.00616114	0.0043573	0.00462469	0.00349794	0.0037049	0.00427447	0.00424005	0.00329991	0.00435825	0.00374532	0.00376219	0.00400802	0.0038641	0.00347408	0.00403276	0.00395257	0.00296736	0.00313558	0.00289017	0.0052531	0.00282885	0.00373856	0.00238777	0.0014771	0.00393279	0.00351686	0.00238229	0.00251256	0.00471238	0.000852515	0.00355527	0.00210438	0.00174738	0.00226606	0.00199325	0.00250627	0.00273598		0.00140449
	0.00562588	0.00613323	0.00435471	0.00462351	0.00349689	0.00368607	0.0042735	0.00422427	0.00328615	0.00435238	0.00374305	0.00376184	0.00399391	0.00385728	0.00346675	0.00400974	0.00394477	0.00296472	0.00313324	0.00288517	0.00525164	0.00282251	0.00372839	0.00238758	0.00146843	0.00392927	0.00351157	0.00238217	0.00250627	0.00471212	0.000852515	0.0035488	0.0021022	0.00174115	0.00226518	0.00199124	0.00250627	0.00273017		0.00138696
	0.00562396	0.00612607	0.00435198	0.00462343	0.003496	0.0036855	0.00427177	0.00419092	0.0032856	0.00434492	0.00373832	0.00376176	0.00399244	0.00385604	0.0034658	0.00400481	0.00394366	0.00296195	0.00312951	0.00288303	0.00523842	0.00281597	0.00372671	0.00238663	0.00146843	0.0039267	0.00350326	0.00238136	0.0025047	0.00471	0.00085034	0.00354553	0.00209895	0.0017387	0.00226467	0.00199029	0.0025	0.00270461		0.00138313
	0.00561555	0.00612015	0.00434323	0.00462005	0.0034904	0.00367647	0.0042707	0.00418513	0.00327225	0.00434297	0.00373134	0.00375469	0.00399182	0.00384468	0.0034638	0.00400331	0.00392927	0.00294985	0.00312591	0.00288125	0.00522765	0.00281471	0.00372124	0.00238209	0.00145773	0.00392267	0.0035021	0.00238095	0.00250313	0.0046902	0.00085034	0.0035382	0.00209851	0.00173518	0.00226244	0.00198807	0.00249822	0.00269771		0.00137931
	0.00561065	0.00611487	0.00433705	0.00461302	0.00348935	0.00366748	0.0042592	0.00418343	0.00326459	0.00433691	0.00371287	0.00375319	0.003986	0.00384383	0.0034555	0.00400297	0.00391389	0.00294985	0.00312012	0.00287687	0.00522466	0.00280554	0.00371945	0.00237954	0.0014556	0.00392256	0.00349922	0.00238048	0.00249732	0.00468909	0.000848176	0.00353243	0.00209342	0.00173244	0.00226244	0.00198491	0.0024819	0.00269058		0.00137931
	0.00559701	0.00611372	0.00433604	0.00461184	0.00348116	0.00366387	0.00425372	0.00418118	0.00325607	0.00433071	0.00371274	0.00375176	0.00396825	0.00384011	0.00345361	0.00400102	0.00391083	0.00294576	0.00309388	0.00287448	0.00520329	0.00280191	0.0037167	0.00237503	0.00145278	0.0039093	0.00349515	0.00237925	0.00249626	0.00468191	0.000844595	0.00353222	0.00209086	0.00172911	0.00226074	0.00198138	0.00247985	0.00268577		0.00137363
	0.00559552	0.00610666	0.004329	0.00460526	0.00347973	0.00366219	0.00425319	0.00417941	0.00325407	0.00433039	0.00371058	0.00375107	0.00396587	0.00383509	0.00345026	0.00399886	0.00391007	0.0029401	0.00309215	0.00286579	0.00519931	0.00279664	0.00371604	0.00237361	0.00144718	0.00390723	0.0034936	0.00237812	0.00249377	0.00467963	0.000839631	0.00352113	0.00209014	0.00172811	0.00225999	0.00197938	0.00247971	0.00268456		0.00136986
	0.00558269	0.0061052	0.00432807	0.00460335	0.00347391	0.00366135	0.00424874	0.00417592	0.00325398	0.00432484	0.00369872	0.00374898	0.00396367	0.00383401	0.00344065	0.00399564	0.00390407	0.00293446	0.00309076	0.00286169	0.00517167	0.0027933	0.00371488	0.00237033	0.00143062	0.00390547	0.00349306	0.00237663	0.00249066	0.00467765	0.000829876	0.00351494	0.00208986	0.00172778	0.00225641	0.00197412	0.00247934	0.00268283		0.00136799
	0.00557491	0.00609878	0.00432236	0.00459559	0.00346306	0.00365764	0.00424729	0.00417216	0.00324879	0.00432214	0.00369852	0.0037462	0.00396257	0.00382946	0.00343081	0.00399476	0.00389455	0.00293172	0.00308833	0.00286123	0.00516871	0.00279259	0.00371333	0.00236546	0.00142959	0.00390422	0.00348602	0.00237192	0.00249066	0.00466853	0.000825764	0.00351339	0.00208516	0.00172712	0.00225479	0.00196678	0.00247934	0.00268266		0.00136799
	0.00557103	0.00606965	0.00432207	0.00459445	0.00343965	0.00365289	0.00424371	0.00416763	0.00324864	0.00431406	0.00368789	0.00374227	0.00395987	0.00382624	0.00339923	0.00399113	0.00389358	0.00292991	0.00308737	0.00285831	0.00515677	0.00276434	0.0037037	0.00236178	0.00142857	0.00389408	0.0034769	0.00236967	0.0024855	0.00466805	0.000825083	0.00350723	0.00208496	0.00172712	0.00225181	0.00196161	0.00247729	0.00267773		0.00136426
	0.00555304	0.00606416	0.0043164	0.00458494	0.00343214	0.00364964	0.00424261	0.00416311	0.0032462	0.00430416	0.00368679	0.00374187	0.00395952	0.0038236	0.00339038	0.00398954	0.00388007	0.00292113	0.00308349	0.00285714	0.00515066	0.00276052	0.0037029	0.00235988	0.00142113	0.00388601	0.00347474	0.0023657	0.00248293	0.00466451	0.000805153	0.00350275	0.00207857	0.00172687	0.00224888	0.00196009	0.00247158	0.00266939		0.0013624
	0.00555275	0.00605114	0.00431288	0.00458235	0.00342857	0.00364243	0.00423998	0.00414777	0.00324457	0.00429738	0.00368596	0.00374065	0.00394973	0.0038183	0.00338983	0.00398827	0.003861	0.00291727	0.00307325	0.00285714	0.00514821	0.00275699	0.00369877	0.00235479	0.00141844	0.00388376	0.00347323	0.00236463	0.00248293	0.00465411	0.000802568	0.00349984	0.00207852	0.0017248	0.00224467	0.00195347	0.00247036	0.00266022		0.00135685
	0.00550206	0.00604053	0.00431034	0.00457632	0.00342332	0.00363636	0.00423783	0.00413273	0.00324079	0.00428939	0.00368127	0.00374042	0.00394672	0.00381679	0.00338766	0.00398692	0.00385852	0.00291715	0.00307251	0.00285381	0.00514442	0.00275689	0.00369762	0.00235194	0.00141093	0.00387653	0.00346835	0.00236078	0.00248139	0.00465297	0.000801282	0.00349584	0.0020778	0.00172414	0.00224467	0.00194447	0.00246751	0.00260025		0.00135685
	0.00550055	0.00603809	0.00428187	0.00455063	0.00341353	0.00363479	0.0042324	0.00412766	0.00323457	0.00428816	0.00367358	0.00373252	0.00393983	0.00381125	0.00337892	0.00398355	0.00385542	0.00291054	0.00306688	0.00284928	0.00514328	0.00275089	0.00368324	0.00234673	0.00140911	0.00386915	0.00346297	0.00235806	0.00248139	0.00465116	0.000799361	0.00348432	0.0020766	0.00171821	0.00224467	0.00194194	0.00246653	0.00259896		0.00135501
	0.00549209	0.0060347	0.00428127	0.00454869	0.00341048	0.00363284	0.00421022	0.00412736	0.00321895	0.00427716	0.00366077	0.00372803	0.00393314	0.0038044	0.00337482	0.00398046	0.00385019	0.00290544	0.00305935	0.00283227	0.00513875	0.00274921	0.00367377	0.00234624	0.00140885	0.00386358	0.00346157	0.00235627	0.00247383	0.00464553	0.000798722	0.00348254	0.00207445	0.00171766	0.00224316	0.00194106	0.00246305	0.00259067		0.00135501
	0.00548639	0.00602567	0.00427594	0.00454387	0.00340358	0.00362131	0.00420757	0.00411918	0.00321608	0.00426687	0.00365911	0.00372622	0.00393106	0.00380421	0.00337079	0.00397995	0.00384986	0.00290135	0.00305899	0.00281979	0.00513699	0.00273973	0.00367197	0.00234535	0.00140647	0.00385414	0.00345736	0.00235516	0.00247295	0.00462392	0.000788022	0.00346278	0.0020734	0.00171418	0.0022358	0.00193611	0.00245661	0.00258788		0.00134953
	0.00548523	0.00602019	0.0042735	0.00454133	0.00339634	0.003621	0.00420272	0.00411523	0.00321595	0.00426537	0.00365672	0.00372362	0.00393082	0.00380317	0.00336289	0.00397772	0.00382409	0.00288675	0.00304878	0.00281311	0.00513108	0.00273848	0.00366672	0.00234467	0.00140143	0.00385083	0.00345607	0.00235415	0.00247066	0.00461474	0.000773994	0.0034621	0.00206493	0.00171336	0.00223557	0.00193611	0.0024558	0.00258355		0.00134771
	0.00548374	0.00601875	0.0042735	0.0045403	0.00339346	0.00361555	0.00419704	0.00411412	0.00320924	0.0042513	0.0036526	0.00372028	0.0039302	0.00380228	0.00336229	0.00397614	0.00380755	0.00288303	0.00304013	0.00281136	0.00512661	0.00273537	0.00365675	0.00234361	0.00139665	0.00384178	0.00345235	0.00234329	0.00246914	0.00461437	0.000766284	0.00345069	0.00206482	0.00171184	0.00223297	0.00193317	0.0024527	0.00258342		0.00133869
	0.00548196	0.0060177	0.0042735	0.00453934	0.00339008	0.00361527	0.00419355	0.00410934	0.0032077	0.0042421	0.00365081	0.00371885	0.00391914	0.00380168	0.00335366	0.00397108	0.00380304	0.00288121	0.00303448	0.00280924	0.00511945	0.00272975	0.0036392	0.00234329	0.0013947	0.00383352	0.00344037	0.00234192	0.00246792	0.00461285	0.000759878	0.0034489	0.00206398	0.00171171	0.00222938	0.0019319	0.00245052	0.00258065		0.0013369
	0.0054678	0.00601052	0.00427269	0.00453752	0.00338824	0.00361167	0.00419078	0.00410893	0.00320256	0.00423168	0.00364443	0.00371698	0.00391797	0.00379747	0.00335289	0.0039644	0.00379049	0.00288115	0.00303424	0.00280505	0.00511696	0.00272975	0.00363857	0.00234314	0.00139276	0.00383317	0.0034398	0.00233687	0.00246184	0.00461117	0.000759878	0.00344553	0.00206061	0.00170989	0.00222585	0.00192964	0.00244775	0.00257599		0.00132979
	0.00546575	0.00600456	0.00427198	0.00453638	0.00338441	0.00361011	0.00418459	0.00410724	0.0032	0.00423089	0.00363167	0.00371156	0.00391496	0.00379331	0.00335215	0.00396135	0.00378501	0.00287722	0.00303326	0.00279785	0.00509554	0.00272944	0.0036201	0.00233973	0.00139233	0.0038236	0.00343643	0.00233122	0.00245902	0.00460683	0.00075643	0.00344012	0.00205973	0.00170965	0.00222442	0.00192864	0.00243436	0.00257109		0.00132979
	0.00546448	0.00599369	0.00426966	0.00453172	0.0033741	0.00361011	0.0041841	0.00410696	0.00319829	0.00422982	0.00363023	0.00370804	0.00391335	0.00376375	0.00335089	0.0039513	0.00378191	0.00287563	0.00302318	0.00279553	0.00509035	0.00272753	0.00361688	0.00233645	0.00138889	0.00380662	0.00342661	0.00232964	0.00245821	0.00459619	0.000755287	0.0034369	0.00205931	0.00170823	0.00222428	0.00192678	0.00243309	0.00256866		0.00132275
	0.00545989	0.00597474	0.00426288	0.00452435	0.00337349	0.00360523	0.00418082	0.00410034	0.0031981	0.00422769	0.00362976	0.00369004	0.00391061	0.00375402	0.00334747	0.00394789	0.00377834	0.00287356	0.00301912	0.00279401	0.00508906	0.00271637	0.00359281	0.00232234	0.00138696	0.00380006	0.00342123	0.00232952	0.002457	0.00458891	0.000744602	0.00343157	0.00205058	0.00170184	0.00222351	0.00192308	0.0024304	0.00256279		0.001321
	0.00545571	0.00595238	0.00424757	0.00451581	0.00337055	0.00360198	0.00418006	0.00409277	0.00319401	0.00422601	0.00362264	0.00366789	0.00390625	0.00375391	0.00333457	0.00394644	0.0037594	0.00287121	0.00301887	0.00278823	0.00507277	0.00271432	0.00358905	0.00232086	0.00138313	0.00379987	0.00341902	0.00232272	0.00245499	0.00458079	0.000744048	0.00341556	0.0020438	0.00170175	0.0022203	0.00192255	0.00242507	0.00255993		0.001321
	0.00545411	0.0059448	0.00424462	0.0045156	0.00336999	0.00360154	0.00417304	0.00409249	0.00318796	0.00422362	0.00361456	0.00365732	0.00390464	0.00375313	0.00333392	0.00393939	0.00374532	0.0028576	0.00301348	0.00278552	0.00507271	0.002712	0.00358607	0.00231711	0.00137963	0.003798	0.00341163	0.00232207	0.00244328	0.0045804	0.00074239	0.00341297	0.00204111	0.00170097	0.00221901	0.00192222	0.00242473	0.00255864		0.00131926
	0.00545256	0.00593912	0.00424208	0.00450595	0.00336784	0.00359868	0.00417141	0.00409127	0.00317965	0.00420819	0.00359497	0.00365408	0.00389712	0.00374964	0.00333258	0.00393812	0.00374345	0.00285598	0.00301122	0.00277918	0.00506433	0.00271166	0.00357782	0.00231683	0.00137741	0.00379766	0.00339111	0.00231548	0.00243902	0.00457928	0.00074239	0.0033993	0.00203832	0.00169981	0.00221239	0.00192194	0.00242382	0.00253593		0.00131752
	0.00545073	0.00592066	0.00423985	0.00449043	0.00336767	0.00358938	0.00416384	0.00408692	0.00317667	0.00420497	0.0035935	0.00365385	0.00389484	0.00374532	0.00333046	0.00392927	0.00372208	0.00285266	0.00301087	0.00277842	0.00506282	0.00271069	0.00356853	0.00231646	0.00137552	0.00378963	0.00338883	0.00231258	0.00243441	0.00457841	0.00074239	0.00339279	0.00203252	0.00169757	0.00221117	0.00191205	0.00241449	0.00253521		0.00131752
	0.00545014	0.00589455	0.00419897	0.0044843	0.003367	0.00358661	0.00415512	0.00408163	0.00316206	0.00420107	0.00359281	0.00365297	0.00388555	0.0037431	0.00332392	0.0039156	0.00371287	0.00285132	0.0030104	0.0027735	0.00506213	0.00271064	0.00356506	0.00231642	0.00137534	0.00376301	0.00337418	0.00231252	0.00243218	0.00455531	0.000734754	0.00339165	0.00202853	0.00169752	0.00221083	0.00191134	0.00241379	0.00251995		0.00131752
	0.00544612	0.00589391	0.00418191	0.00446169	0.00336022	0.00358517	0.00415282	0.00407463	0.00313972	0.00419553	0.00358766	0.0036479	0.00388302	0.00372856	0.00332025	0.0039093	0.00370687	0.00283573	0.00298839	0.00277072	0.0050598	0.00270636	0.00354381	0.00230623	0.00137174	0.00375171	0.00337397	0.00230947	0.0024321	0.00455472	0.000733138	0.00339083	0.00202246	0.00169738	0.00220913	0.00190944	0.00241287	0.00250627		0.00131752
	0.00542741	0.00589255	0.00417973	0.00446046	0.00335327	0.00358423	0.00414938	0.00407268	0.00313792	0.00419375	0.00358626	0.0036423	0.00387597	0.00372311	0.00331804	0.0039066	0.00368376	0.00283286	0.00298269	0.00277008	0.00505853	0.00270184	0.00353558	0.00230356	0.00137174	0.00373719	0.003367	0.00230883	0.00243112	0.00455045	0.000732601	0.00338753	0.00202204	0.00169492	0.0022082	0.00190788	0.00240529	0.00250139		0.00131234
	0.00542636	0.00588901	0.00417627	0.00445958	0.00335295	0.00358423	0.00414794	0.00407213	0.00313283	0.00418888	0.00357873	0.00363802	0.00387553	0.00371081	0.00331471	0.00390343	0.00366524	0.00283242	0.00298106	0.00276419	0.00504913	0.00269833	0.00352973	0.00230097	0.00136426	0.00373013	0.00336617	0.00230769	0.00243072	0.00455016	0.00073046	0.00338534	0.00202071	0.0016942	0.00220773	0.00190638	0.00240449	0.00249639		0.00131062
	0.00542387	0.00588107	0.00416341	0.00445931	0.00335239	0.00358423	0.00414508	0.00406955	0.00312454	0.00418684	0.00357846	0.00360334	0.00387534	0.00369523	0.00330482	0.003903	0.00365854	0.00283152	0.00297324	0.00276091	0.00503486	0.00269605	0.00352338	0.00229885	0.00136314	0.00371563	0.00335506	0.00230503	0.00243013	0.00454981	0.000729395	0.00338036	0.00201765	0.00169268	0.00220588	0.00190549	0.0023988	0.00248872		0.00130719
	0.00541726	0.00586092	0.00416048	0.00445886	0.00334843	0.00357965	0.00414485	0.0040549	0.0031235	0.00418177	0.00355668	0.00359712	0.00387506	0.0036826	0.00329632	0.00390226	0.00365631	0.00282674	0.00296465	0.00275651	0.00501183	0.00269602	0.00351803	0.00229885	0.00136132	0.00370855	0.00335281	0.00229885	0.00243013	0.00452557	0.000728863	0.00337154	0.00201761	0.00169169	0.00220264	0.00190452	0.00239808	0.00248315		0.00130719
	0.00540419	0.00585854	0.00415884	0.00445718	0.00332141	0.00357143	0.00413793	0.00404546	0.00311795	0.00417755	0.00355288	0.00359662	0.00386954	0.00368125	0.00329429	0.00388266	0.00365344	0.00282552	0.00296183	0.00275583	0.00501049	0.00268528	0.00351269	0.00229682	0.00135777	0.00368968	0.00335062	0.00229772	0.00242866	0.00451039	0.000728863	0.00337018	0.00201687	0.00169109	0.00220088	0.00190355	0.00239464	0.002477		0.00130719
	0.00539906	0.00584089	0.00414758	0.00445104	0.00331744	0.00355714	0.00413712	0.00403976	0.00311526	0.00417319	0.00352609	0.00358965	0.00386432	0.00366147	0.00329083	0.00387399	0.00360929	0.00282333	0.00295886	0.00275577	0.00500338	0.00268097	0.00351167	0.00229674	0.00134228	0.00368852	0.00335028	0.00229621	0.00242718	0.0045098	0.000727273	0.00336895	0.00201613	0.00169062	0.00219933	0.00190311	0.00239234	0.00246914		0.00130378
	0.00539653	0.00583204	0.0041435	0.00444939	0.00331492	0.00355297	0.00413424	0.00403598	0.00311526	0.00417001	0.00352526	0.00358836	0.00385233	0.00365854	0.00327511	0.0038736	0.00360546	0.00282124	0.00295214	0.00275229	0.00499405	0.00267814	0.00349854	0.00229668	0.0013363	0.0036855	0.00334448	0.0022931	0.00242601	0.00450844	0.000724113	0.00336521	0.00201396	0.00168445	0.00219419	0.00190114	0.00239234	0.00246609		0.00129702
	0.00539499	0.00577617	0.00413304	0.0044405	0.00331248	0.00354264	0.00413345	0.00403407	0.003113	0.00416967	0.00352113	0.00358621	0.00385222	0.00365798	0.00326797	0.0038702	0.00357483	0.0028169	0.00295203	0.00274586	0.00499017	0.00267261	0.00348802	0.00229489	0.00133601	0.00368509	0.00331592	0.00229183	0.00242571	0.00450715	0.000723589	0.00336427	0.00201258	0.00167754	0.00219419	0.00190114	0.0023863	0.00246413		0.00129032
	0.00539255	0.00577558	0.00412764	0.00443989	0.00331174	0.00354039	0.0041328	0.00402468	0.00310435	0.00416435	0.00350946	0.00357508	0.00385194	0.00363679	0.00326176	0.00386266	0.00356252	0.0028084	0.00294985	0.00273973	0.00498986	0.00266489	0.00347524	0.00229446	0.00133472	0.00368227	0.00329852	0.00229035	0.0024255	0.00450016	0.000723066	0.00334129	0.00201149	0.00167544	0.00219364	0.00189934	0.0023856	0.00246078		0.00127065
	0.00538278	0.0057702	0.00412002	0.00443528	0.003311	0.00353829	0.00413223	0.0040201	0.00310228	0.00416112	0.00350775	0.00357063	0.0038478	0.00362849	0.00326036	0.00386134	0.00355999	0.00280535	0.00294262	0.0027371	0.00498631	0.00266454	0.003457	0.00228938	0.00131202	0.00368139	0.00329106	0.00228548	0.00242326	0.00449691	0.000722022	0.00333595	0.0020114	0.00167286	0.00219131	0.00189779	0.0023819	0.00245339		0.00125313
	0.00538213	0.00576568	0.0041182	0.00443213	0.00330789	0.00353774	0.00413149	0.00401731	0.00309418	0.00415973	0.00349825	0.00356597	0.00382775	0.00361011	0.00324597	0.00386126	0.00353826	0.00280439	0.00294041	0.00273224	0.00497557	0.00266193	0.00344066	0.00228474	0.0013089	0.00367439	0.00328693	0.002285	0.00241838	0.00449366	0.000722022	0.0033284	0.00201062	0.00166627	0.00218818	0.00189609	0.00237731	0.00244848		0.00125313
	0.00537634	0.00576467	0.00411636	0.00443197	0.00330033	0.00353774	0.00411969	0.00400786	0.00308764	0.00415584	0.00348939	0.00355942	0.00382465	0.00360668	0.0032442	0.00385814	0.0035259	0.00280255	0.00292398	0.0027248	0.00495868	0.00266115	0.00343708	0.00228267	0.00130039	0.00367197	0.00328286	0.00227337	0.00241663	0.00448718	0.000722022	0.00332141	0.00200943	0.00166306	0.00218727	0.00189514	0.00237581	0.00243563		0.00125313
	0.00537634	0.00574493	0.00410256	0.00442926	0.00329426	0.00353281	0.00411805	0.00400623	0.00307929	0.00415554	0.00348554	0.0035551	0.00381853	0.00360505	0.0032416	0.00385802	0.00352044	0.00280007	0.00292297	0.00271903	0.00495575	0.00265568	0.0034362	0.00228206	0.00129032	0.00366147	0.00328246	0.00227324	0.00241313	0.00446067	0.000718907	0.00331874	0.00200011	0.00166289	0.00218659	0.00189484	0.00237248	0.00243143		0.00124688
	0.00537178	0.00574185	0.0040856	0.00440986	0.00328677	0.00353207	0.00411765	0.00400534	0.00307434	0.00413683	0.00348316	0.0035461	0.00381258	0.00359559	0.00323935	0.00385682	0.00351837	0.00279883	0.00290653	0.00271426	0.00495154	0.00265545	0.00343365	0.00227894	0.00128894	0.00365297	0.00327735	0.00226715	0.00240964	0.00444708	0.000718391	0.00331464	0.0019972	0.00165769	0.00218409	0.00189445	0.00237248	0.00242277		0.00124533
	0.00537081	0.00573847	0.00407576	0.00440711	0.00328634	0.00352039	0.00411523	0.00399808	0.00307073	0.00412148	0.00348039	0.00353893	0.00381098	0.00358566	0.00323666	0.00385678	0.00351406	0.00279623	0.00290165	0.00270179	0.0049505	0.00265076	0.00343296	0.00227865	0.00128866	0.00364641	0.0032758	0.00226706	0.00240577	0.00444586	0.000717875	0.00331126	0.00199707	0.00165609	0.00218341	0.00188953	0.0023706	0.00240848		0.00124378
	0.00536913	0.0057366	0.00406579	0.00440484	0.00328587	0.00351412	0.00410362	0.00398406	0.00306331	0.0041184	0.00347481	0.00353893	0.00380451	0.00357782	0.00323625	0.00385635	0.00350672	0.00278926	0.00287742	0.00270149	0.00494677	0.00264842	0.00343189	0.00227411	0.00128576	0.00363978	0.00326087	0.00226244	0.00240192	0.0044453	0.00071582	0.00330749	0.00199512	0.00165563	0.00218155	0.00188605	0.00236967	0.00239234		0.00124224
	0.00535771	0.00572191	0.00406504	0.00438334	0.00328253	0.0035098	0.00410295	0.00396589	0.00305371	0.00409902	0.00346675	0.00353565	0.00380349	0.00357744	0.00323482	0.00384827	0.00349854	0.002788	0.00287707	0.0026975	0.00493782	0.0026455	0.00342673	0.00227108	0.00127959	0.00363416	0.00325945	0.00226244	0.00240096	0.00444341	0.000715308	0.00330657	0.00199506	0.00165221	0.00218023	0.00188375	0.00236911	0.00238975		0.00124069
	0.0053568	0.00571429	0.00406442	0.00437781	0.00327604	0.00350577	0.00410126	0.00396587	0.00305316	0.00408965	0.00346226	0.00353419	0.00380009	0.00357443	0.00323276	0.00384615	0.0034904	0.002785	0.00286944	0.00269122	0.00493347	0.0026434	0.00341131	0.00226757	0.00127129	0.00363306	0.00325269	0.00225451	0.00239808	0.00444335	0.000714796	0.00330438	0.00199373	0.00165098	0.00217569	0.00188088	0.00236908	0.00237422		0.00123916
	0.00535396	0.00570158	0.00406174	0.00437212	0.00326458	0.0035057	0.00409207	0.00396483	0.0030524	0.00408846	0.00344927	0.00351852	0.00379867	0.00357398	0.00322847	0.00384307	0.00347759	0.0027833	0.00285307	0.00268917	0.00492183	0.00264259	0.00341064	0.00226629	0.00126823	0.00363196	0.00325269	0.00225056	0.00239808	0.00439994	0.000713776	0.00328587	0.00198939	0.00164904	0.00217267	0.0018797	0.0023678	0.00234797		0.00123916
	0.00534545	0.00570149	0.00405048	0.00437028	0.00326389	0.00349076	0.00408998	0.00396013	0.0030492	0.00408163	0.00344504	0.00351288	0.00378947	0.00357356	0.00322581	0.00384	0.00347222	0.00277427	0.00284495	0.00267953	0.00491859	0.00264085	0.00340657	0.00226501	0.00126743	0.00363086	0.00324792	0.00224115	0.00239425	0.00439522	0.000711744	0.00328542	0.00198523	0.00164677	0.00217244	0.00187807	0.00236581	0.00234707		0.00123916
	0.00534416	0.0056974	0.00404676	0.00437018	0.00326185	0.00348432	0.00407988	0.00395913	0.00304878	0.00407498	0.00344495	0.00350701	0.00378487	0.00356907	0.00322356	0.00383828	0.00345622	0.00277296	0.00283861	0.00267866	0.00491458	0.00263293	0.00340522	0.00226352	0.00126582	0.0036302	0.00323952	0.00223714	0.00239398	0.0043911	0.000711744	0.00328425	0.00198428	0.0016442	0.0021692	0.00187793	0.00236407	0.00234055		0.00123609
	0.00533258	0.0056938	0.00404573	0.00436681	0.00325829	0.00348432	0.00407361	0.00395671	0.00303884	0.00407034	0.00344037	0.0035024	0.00378085	0.00356234	0.00322156	0.00383772	0.00344828	0.00276532	0.00283286	0.00267074	0.0049053	0.00262651	0.00340522	0.0022633	0.00126502	0.00362684	0.00323947	0.00223297	0.00238854	0.00437743	0.000711238	0.00328313	0.00197406	0.00164307	0.00216522	0.00187711	0.00236128	0.00233355		0.00123457
	0.00531208	0.00568451	0.00404269	0.00436469	0.00324838	0.0034823	0.00407332	0.00395219	0.00303783	0.00406654	0.00343607	0.00348837	0.00377596	0.00355906	0.00322113	0.00383632	0.00344462	0.00275862	0.00283114	0.00266667	0.00490514	0.00262467	0.00339501	0.00226098	0.00126135	0.00362483	0.00323485	0.0022314	0.00238663	0.00437318	0.000710732	0.00327726	0.00197117	0.00164069	0.0021645	0.00187606	0.0023596	0.00232558		0.00123457
	0.00530951	0.00567577	0.00402921	0.00435803	0.00324538	0.00347625	0.00407201	0.00394823	0.00303084	0.00406631	0.00343446	0.0034828	0.00377567	0.00355337	0.00321802	0.00383305	0.00342466	0.00275166	0.00283077	0.00266667	0.00490274	0.00261842	0.00339367	0.00226017	0.00125628	0.00361882	0.0032267	0.00223131	0.00238663	0.00435594	0.000704722	0.0032772	0.00196464	0.00164032	0.00215561	0.00187316	0.0023573	0.00231029		0.00123153
	0.00530504	0.00564556	0.00401606	0.00434688	0.00324149	0.00347625	0.00407031	0.00394756	0.0030303	0.0040659	0.00343249	0.00348051	0.00377432	0.00355114	0.00321494	0.00383275	0.00341556	0.00275085	0.00282543	0.00266275	0.00490196	0.00261414	0.00339079	0.00225989	0.00125534	0.00361788	0.00322334	0.00223104	0.00238521	0.00434387	0.000699301	0.00326682	0.00195814	0.00163666	0.00213929	0.00187209	0.00235532	0.00227505		0.00123001
	0.00530252	0.00564103	0.00401499	0.00434678	0.00323858	0.00346647	0.0040666	0.00394657	0.00302775	0.00406544	0.00341297	0.00347913	0.00376354	0.00353635	0.00320706	0.00383198	0.00341297	0.0027504	0.0028197	0.00266075	0.00489225	0.00260325	0.00339047	0.00225938	0.00125156	0.00360144	0.00322224	0.00222519	0.0023753	0.00434122	0.000698324	0.00326323	0.00195631	0.00163479	0.00213894	0.00186916	0.00235516	0.00226514		0.00123001
	0.0053012	0.00562606	0.0040024	0.00434468	0.00323725	0.00346149	0.00405988	0.00394477	0.00302669	0.0040607	0.0034125	0.00347625	0.00376182	0.00352832	0.0032	0.00382768	0.00340909	0.0027479	0.00281577	0.0026605	0.00488511	0.00259179	0.00337395	0.00225836	0.00125156	0.00360082	0.00321867	0.00222481	0.00237248	0.00433934	0.000693963	0.00325309	0.0019516	0.00163043	0.00213758	0.00186619	0.00235492	0.00226074		0.00122399
	0.00529998	0.00560278	0.00399391	0.0043441	0.00323723	0.0034613	0.00405817	0.00394011	0.00302632	0.00405844	0.00341244	0.00347356	0.0037376	0.00352485	0.0032	0.00381056	0.00339943	0.00274725	0.00281195	0.00265957	0.00487535	0.00259172	0.00336763	0.00225785	0.00124533	0.00360072	0.00321382	0.00222362	0.00236686	0.00433839	0.000693481	0.00325203	0.00194774	0.00162978	0.00213415	0.00186511	0.00235479	0.00224997		0.00122249
	0.00529483	0.00559135	0.00399231	0.00433912	0.00323363	0.00346021	0.00405449	0.00390992	0.00302032	0.0040568	0.00341244	0.00345401	0.00373677	0.00352457	0.00319912	0.00380325	0.00339674	0.00274657	0.00280505	0.00265929	0.00487395	0.00258532	0.00336485	0.00225734	0.00124224	0.00359712	0.00321158	0.00221566	0.00236407	0.004329	0.000688705	0.00324826	0.00194595	0.00162734	0.00213371	0.00185782	0.0023546	0.00224991		0.001221
	0.00528649	0.00559006	0.00399222	0.00432767	0.00323343	0.00345929	0.00405018	0.00390908	0.00301152	0.0040568	0.00341151	0.00343975	0.00373433	0.00350877	0.00319108	0.00379949	0.00338346	0.00273799	0.00280354	0.00264842	0.00486941	0.00257943	0.00334784	0.00225734	0.001241	0.00359712	0.00320566	0.00221551	0.00236128	0.00430828	0.000685871	0.00324374	0.00194326	0.00162496	0.0021322	0.00185394	0.00235373	0.00224791		0.001221
	0.00527478	0.00558347	0.00399202	0.00432028	0.00322581	0.00345897	0.00404422	0.00390723	0.0029947	0.00405231	0.00341028	0.00343736	0.00372467	0.00350758	0.00319022	0.00379395	0.00338028	0.00272829	0.00279916	0.00263591	0.00486527	0.00257297	0.00334448	0.00225225	0.00122649	0.00359389	0.00319656	0.00221435	0.00235294	0.00429492	0.000667557	0.0032427	0.00194097	0.00162404	0.00212766	0.00185014	0.00235294	0.0022445		0.00121507
	0.00527344	0.00557506	0.00398504	0.00430663	0.00322445	0.00345883	0.00404172	0.00390625	0.00298996	0.00404975	0.00340633	0.00342517	0.00372093	0.00349834	0.00318584	0.00379075	0.00337205	0.0027248	0.00279525	0.00263158	0.00486224	0.00256739	0.00332728	0.00225191	0.00122474	0.00358166	0.0031881	0.00221169	0.00235294	0.00429326	0.000667111	0.00323807	0.00193885	0.00162206	0.00212389	0.00185014	0.00235073	0.00224106		0.00121359
	0.00526497	0.00556312	0.00398313	0.00430571	0.00322082	0.00345477	0.00403536	0.00390407	0.0029896	0.00404276	0.00340339	0.00341588	0.00371867	0.00349727	0.00317909	0.00378788	0.00336952	0.00272257	0.00278843	0.00262774	0.00484262	0.00256363	0.00331586	0.00224944	0.00121877	0.00357594	0.00318425	0.00220946	0.00234926	0.00428222		0.00322581	0.00193745	0.0016218	0.0021225	0.00185014	0.00234742	0.00224066		0.00121359
	0.00526195	0.00555418	0.00397311	0.00430228	0.003215	0.00345224	0.00403448	0.00389764	0.00298814	0.00403248	0.00339905	0.00339977	0.00371747	0.0034965	0.00316957	0.00378602	0.00336629	0.00271903	0.00278324	0.00262624	0.00483871	0.00256208	0.00331538	0.00224503	0.00121803	0.00357308	0.00317864	0.00220607	0.00234192	0.00427028		0.0032235	0.00193424	0.00161865	0.00212064	0.00184824	0.00234467	0.00223825		0.00121359
	0.0052592	0.00554939	0.00396485	0.00429799	0.0032077	0.00345115	0.00401606	0.0038961	0.00298507	0.0040293	0.00339242	0.00339775	0.00371527	0.00349605	0.00316178	0.00378358	0.00336574	0.00271801	0.00278075	0.00262423	0.00483676	0.00255973	0.00331295	0.00224215	0.00121017	0.00356319	0.00317797	0.0022055	0.00234009	0.00426546		0.00321735	0.00193374	0.00161655	0.00211606	0.0018423	0.00234445	0.00223752		0.00121212
	0.00524781	0.00554785	0.00396341	0.00429492	0.00319744	0.00344776	0.00401606	0.00389321	0.0029831	0.0040282	0.00338635	0.00339634	0.00371371	0.00349592	0.00314196	0.0037831	0.00336323	0.00271693	0.00277869	0.0026178	0.00483325	0.00255808	0.00331126	0.00223814	0.00120992	0.00356154	0.00317654	0.00220397	0.00233791	0.00425758		0.00321285	0.00193288	0.00161134	0.00210665	0.00183891	0.00233729	0.00223164		0.00121212
	0.00524345	0.00553729	0.00396162	0.00429316	0.00319664	0.00344093	0.00401293	0.00389004	0.00298211	0.00402341	0.00338115	0.00339487	0.00370828	0.00348218	0.00313825	0.00378142	0.00336134	0.0027127	0.00277811	0.00261307	0.00483092	0.00255687	0.00330705	0.00223776	0.00120919	0.00355872	0.00317348	0.00220303	0.00233781	0.00424943		0.00320839	0.00193157	0.0016095	0.00210305	0.00183438	0.00233699	0.00222395		0.00121065
	0.00523159	0.00553209	0.00395257	0.00429307	0.00319564	0.00344023	0.00401204	0.00388819	0.0029782	0.00401991	0.00336182	0.00338868	0.00369717	0.00348209	0.00313366	0.00377169	0.00336101	0.00271044	0.00277242	0.00260598	0.00483092	0.00255389	0.00330542	0.00223623	0.00120846	0.00355845	0.00316807	0.00220264	0.00233645	0.00424809		0.00318514	0.0019315	0.00160514	0.00210261	0.00183124	0.00233584	0.0022162		0.00121065
	0.00521437	0.00553063	0.00395192	0.00428244	0.0031861	0.00343407	0.00400712	0.00388061	0.00297785	0.00401308	0.00335255	0.003367	0.00369164	0.00347947	0.00312744	0.00376884	0.0033543	0.00270697	0.00277008	0.0026003	0.00481373	0.00255239	0.00329934	0.00223444	0.00120773	0.00355731	0.00316302	0.00220167	0.00233645	0.00423953		0.00317999	0.00193077	0.00160328	0.00210107	0.00182815	0.00233372	0.00220485		0.00120919
	0.00521409	0.00552944	0.00394867	0.00427978	0.00318147	0.00342857	0.00400663	0.00385269	0.00296343	0.0040107	0.0033511	0.00336343	0.0036874	0.00347711	0.00311833	0.00376884	0.00335383	0.00270591	0.00276981	0.00259516	0.00480615	0.00255102	0.00329761	0.00222717	0.00120627	0.00355635	0.00315956	0.00220022	0.00233645	0.00423168		0.00316456	0.0019305	0.0016021	0.00209581	0.00182593	0.00233168	0.00220083		0.00120482
	0.00520963	0.00552764	0.00394436	0.00427655	0.00317593	0.00342501	0.00400515	0.00384968	0.00296097	0.00400802	0.00334821	0.00336004	0.00368664	0.00347037	0.00311604	0.00376471	0.00334975	0.00270536	0.00275665	0.00259481	0.00479193	0.00254488	0.00329637	0.00222379	0.00120627	0.0035467	0.0031552	0.00219861	0.00233554	0.00422971		0.00316156	0.00192976	0.00160099	0.00208364	0.00182533	0.00232959	0.00219816		0.00120482
	0.00520833	0.00552319	0.00394124	0.00426323	0.00317484	0.00342199	0.00400367	0.0038475	0.00295437	0.004	0.00334753	0.00335711	0.0036855	0.00346691	0.00310559	0.00376454	0.00333472	0.00269542	0.0027533	0.00259202	0.00478965	0.00254298	0.00328857	0.00222222	0.0012012	0.00354233	0.00314946	0.00219684	0.00232558	0.00422226		0.00315884	0.00192827	0.00159847	0.00208203	0.00182162	0.00232693	0.00219649		0.00120482
	0.00520177	0.00550731	0.00394119	0.00426187	0.0031746	0.00341997	0.00400343	0.00384161	0.00295146	0.00399202	0.0033455	0.00335008	0.00367959	0.00346348	0.00310559	0.00376254	0.00333268	0.00269421	0.00275236	0.0025888	0.00478886	0.00254194	0.00328449	0.00221038	0.00120096	0.00353179	0.00314729	0.00219408	0.00232558	0.0042133		0.00315835	0.00192369	0.00159744	0.0020794	0.00182149	0.00232648	0.00219427		0.00120482
	0.00520041	0.00549001	0.00393205	0.00424439	0.00316957	0.00341797	0.00399886	0.00383795	0.00294939	0.00399028	0.00334448	0.00334697	0.00367715	0.00345523	0.00310294	0.0037594	0.00332779	0.002693	0.00274788	0.00258746	0.0047759	0.00254187	0.00327841	0.00220908	0.00118343	0.00352485	0.00314465	0.00219058	0.00232288	0.00420521		0.00315789	0.00192025	0.00159744	0.00207923	0.00182017	0.00232475	0.00219041		0.00120337
	0.00519377	0.00548785	0.00392542	0.00423655	0.00316352	0.00341777	0.0039984	0.0038355	0.00294575	0.00398687	0.00334405	0.0033389	0.00367505	0.00343784	0.00309385	0.00375216	0.00332717	0.00267777	0.00274348	0.00258459	0.00477555	0.00253791	0.0032763	0.00220751	0.00118343	0.00352225	0.00313635	0.00218792	0.00232198	0.00419375		0.00314748	0.00191601	0.00159639	0.002076	0.00180465	0.00232019	0.00218579		0.00120192
	0.00519346	0.00548275	0.00392413	0.00422734	0.00315994	0.00341157	0.00399631	0.00383278	0.00294233	0.00397614	0.00333399	0.00333069	0.00367465	0.00343643	0.00307984	0.00374532	0.00332088	0.00267559	0.00274265	0.00257732	0.00476908	0.00253027	0.00327138	0.00219849	0.00118343	0.00351662	0.00313349	0.00218682	0.00231884	0.00419375		0.00313972	0.00191058	0.0015949	0.00207352	0.00180375	0.00231696	0.00217594		0.00119904
	0.00517598	0.0054784	0.00392362	0.00421941	0.00315068	0.00340995	0.00399255	0.00382979	0.00294054	0.00396552	0.00333095	0.00332577	0.00367261	0.00343249	0.00307706	0.00374404	0.00331725	0.0026738	0.00273598	0.00257106	0.00475363	0.00252778	0.00326797	0.00219834	0.00118175	0.00351626	0.00311419	0.00218172	0.00231774	0.00419099		0.0031198	0.00190985	0.00158856	0.00207147	0.00180288	0.00231596	0.00215647		0.00119904
	0.00516591	0.00547548	0.00391209	0.00421941	0.00314582	0.0034069	0.0039878	0.00382759	0.00293686	0.00395741	0.00332816	0.00332509	0.00367134	0.00342776	0.00307062	0.00373907	0.00330657	0.0026738	0.00273504	0.00256306	0.00473854	0.0025184	0.00325336	0.00219834	0.00117509	0.00350877	0.00311358	0.00217924	0.00231571	0.00418191		0.00311526	0.00190885	0.00158518	0.00207138	0.00180266	0.00231558	0.0021497		0.0011976
	0.00516488	0.00546812	0.00390949	0.00421893	0.00314436	0.00339926	0.00398089	0.00382294	0.00293553	0.00395504	0.00332717	0.00332226	0.00367132	0.00342283	0.0030698	0.00373775	0.00329761	0.0026704	0.00273005	0.00256137	0.00473691	0.00251572	0.00324986	0.00219539	0.00117391	0.0035016	0.00310697	0.00217806	0.00231328	0.00418191		0.00311394	0.00190496	0.00158479	0.00206304	0.00179941	0.00231348	0.00214846		0.00119617
	0.00515796	0.00544908	0.00390921	0.00420409	0.00314301	0.00339495	0.0039768	0.00381679	0.00293402	0.00395257	0.00331026	0.00331878	0.00367089	0.00341835	0.00306714	0.00372234	0.00328347	0.00266983	0.00272747	0.00256052	0.0047239	0.00251537	0.00323475	0.00219424	0.00117233	0.00349846	0.00309789	0.00217683	0.00231023	0.0041791		0.0031127	0.00190204	0.00158428	0.00205986	0.00179802	0.0023116	0.00214592		0.00119617
	0.00514958	0.00543478	0.00389959	0.0042029	0.00313927	0.00339399	0.00397201	0.00381243	0.00293029	0.0039346	0.0033033	0.00331515	0.00366972	0.00341297	0.00306574	0.00371661	0.00326797	0.00266183	0.00272251	0.00255754	0.00470773	0.00251509	0.00323363	0.00219378	0.00116993	0.00348653	0.00309781	0.00216763	0.00230947	0.00417537		0.00311186	0.00189625	0.00158284	0.0020555	0.00179727	0.0023108	0.00214109		0.00119474
	0.00514905	0.00542586	0.00389914	0.00419311	0.00313059	0.0033866	0.00396825	0.00381025	0.00292533	0.00393369	0.00329724	0.00330189	0.00366642	0.0034038	0.00306353	0.00370575	0.00326188	0.00266134	0.00271207	0.00255654	0.0046929	0.00251159	0.00323102	0.00218818	0.00116754	0.00348589	0.00309598	0.00216259	0.0023084	0.00417362		0.0031118	0.00189514	0.00158228	0.00205423	0.00179644	0.00230947	0.00213432		0.0011919
	0.00514259	0.00541878	0.00389285	0.00418599	0.00312678	0.003386	0.00396616	0.00380573	0.00292072	0.00392484	0.00328767	0.0032801	0.00364507	0.00340311	0.00306112	0.00370468	0.00325534	0.00265487	0.0027027	0.00255646	0.00468368	0.00251099	0.00322928	0.00218239	0.00116686	0.00348297	0.00309332	0.00215575	0.00230769	0.00416667		0.00310655	0.00189343	0.00158144	0.00205339	0.00179104	0.00230751	0.00212314		0.00118064
[truncated: 21,564 more rows]
