# Supplementary material for: A large effective population size for established within-host influenza virus infection
Source: eLife. 2020 Aug 10;9:e56915. doi: 10.7554/eLife.56915 (PMC7431133; doi:10.7554/eLife.56915)
Supplement: Figure 2—figure supplement 5—source data 1. [file elife-56915-fig2-figsupp5-data1.xlsx]

## Sheet: Figure
		Sample A	Sample B		Log frequency A	Log frequency B
		0.499546	0.492482		-0.301425	-0.30761
		0.499341	0.480765		-0.301603	-0.318067
		0.499219	0.496252		-0.301709	-0.304298
		0.494906	0.487984		-0.305477	-0.311594
		0.492225	0.479208		-0.307836	-0.319476
		0.492129	0.471879		-0.307921	-0.326169
		0.489669	0.498622		-0.310097	-0.302229
		0.487606	0.484465		-0.311931	-0.314738
		0.486534	0.469652		-0.312887	-0.328224
		0.483736	0.477045		-0.315392	-0.321441
		0.482144	0.467487		-0.316823	-0.33023
		0.480268	0.461602		-0.318516	-0.335732
		0.479843	0.468714		-0.318901	-0.329092
		0.479264	0.484714		-0.319425	-0.314514
		0.475955	0.482463		-0.322434	-0.316536
		0.474858	0.467079		-0.323436	-0.33061
		0.472859	0.480771		-0.325268	-0.318062
		0.471154	0.475159		-0.326837	-0.323161
		0.470289	0.491689		-0.327635	-0.30831
		0.467823	0.474897		-0.329918	-0.323401
		0.467665	0.457124		-0.330065	-0.339966
		0.467416	0.466997		-0.330296	-0.330686
		0.464552	0.452016		-0.332966	-0.344846
		0.463479	0.462022		-0.33397	-0.335337
		0.46325	0.460303		-0.334185	-0.336956
		0.462394	0.465924		-0.334988	-0.331685
		0.461714	0.447972		-0.335627	-0.348749
		0.460182	0.473513		-0.33707	-0.324668
		0.458527	0.446668		-0.338635	-0.350015
		0.45783	0.44088		-0.339296	-0.35568
		0.456739	0.447022		-0.340332	-0.349671
		0.455894	0.454912		-0.341136	-0.342073
		0.455162	0.42977		-0.341834	-0.366764
		0.445479	0.43637		-0.351173	-0.360145
		0.444341	0.416382		-0.352284	-0.380508
		0.444001	0.448049		-0.352616	-0.348674
		0.443119	0.440184		-0.35348	-0.356366
		0.442884	0.446069		-0.35371	-0.350598
		0.442712	0.452326		-0.353879	-0.344548
		0.441896	0.439034		-0.35468	-0.357502
		0.441826	0.424971		-0.354749	-0.371641
		0.441366	0.444213		-0.355201	-0.352409
		0.43782	0.414381		-0.358704	-0.3826
		0.434586	0.425277		-0.361924	-0.371328
		0.433632	0.407156		-0.362879	-0.390239
		0.432848	0.404124		-0.363665	-0.393485
		0.431612	0.416212		-0.364906	-0.380685
		0.431495	0.408412		-0.365024	-0.388902
		0.427295	0.42746		-0.369272	-0.369105
		0.426648	0.435773		-0.36993	-0.36074
		0.426186	0.413181		-0.370401	-0.38386
		0.425737	0.419061		-0.370859	-0.377723
		0.424131	0.412698		-0.3725	-0.384368
		0.423394	0.404491		-0.373255	-0.393091
		0.422446	0.434792		-0.374229	-0.361718
		0.420878	0.417294		-0.375844	-0.379558
		0.419126	0.4111		-0.377655	-0.386053
		0.416395	0.397047		-0.380494	-0.401158
		0.398983	0.373737		-0.399046	-0.427434
		0.39652	0.39396		-0.401735	-0.404548
		0.395387	0.40271		-0.402978	-0.395008
		0.386662	0.370719		-0.412669	-0.430955
		0.385595	0.393616		-0.413869	-0.404927
		0.384847	0.359085		-0.414712	-0.444803
		0.384284	0.378879		-0.415348	-0.421499
		0.38317	0.41393		-0.416609	-0.383073
		0.382848	0.428761		-0.416974	-0.367785
		0.370183	0.366126		-0.431584	-0.436369
		0.367706	0.361957		-0.434499	-0.441343
		0.367123	0.362871		-0.435188	-0.440248
		0.366927	0.364756		-0.43542	-0.437998
		0.366249	0.372851		-0.436224	-0.428465
		0.36269	0.36299		-0.440464	-0.440105
		0.355621	0.355633		-0.449013	-0.448998
		0.343789	0.341139		-0.463708	-0.467069
		0.342699	0.338728		-0.465087	-0.470149
		0.329445	0.333933		-0.482217	-0.476341
		0.32918	0.326323		-0.482567	-0.486352
		0.318252	0.330763		-0.497229	-0.480483
		0.316117	0.334624		-0.500152	-0.475443
		0.312555	0.333516		-0.505074	-0.476883
		0.310843	0.32766		-0.507459	-0.484577
		0.304371	0.311629		-0.516597	-0.506362
		0.303882	0.310903		-0.517295	-0.507375
		0.299773	0.292743		-0.523207	-0.533513
		0.297097	0.289442		-0.527102	-0.538438
		0.296914	0.332564		-0.527369	-0.478125
		0.294608	0.293925		-0.530755	-0.531763
		0.29367	0.276847		-0.53214	-0.55776
		0.293607	0.300443		-0.532234	-0.522238
		0.293035	0.299681		-0.533081	-0.523341
		0.292131	0.337218		-0.534422	-0.472089
		0.288661	0.304076		-0.539612	-0.517018
		0.287283	0.312557		-0.54169	-0.505071
		0.284898	0.292292		-0.545311	-0.534183
		0.284592	0.273713		-0.545777	-0.562705
		0.283934	0.277082		-0.546783	-0.557392
		0.283393	0.282705		-0.547611	-0.548667
		0.282249	0.264936		-0.549368	-0.576859
		0.281127	0.287569		-0.551097	-0.541258
		0.277317	0.269552		-0.557024	-0.569357
		0.276536	0.269074		-0.558248	-0.570128
		0.275904	0.274432		-0.559242	-0.561565
		0.275315	0.254729		-0.56017	-0.593922
		0.275194	0.271853		-0.560361	-0.565666
		0.274215	0.286563		-0.561909	-0.54278
		0.274069	0.266528		-0.56214	-0.574257
		0.270997	0.29439		-0.567036	-0.531077
		0.269286	0.259487		-0.569786	-0.585884
		0.268428	0.262847		-0.571172	-0.580297
		0.26728	0.263526		-0.573034	-0.579177
		0.266933	0.278162		-0.573598	-0.555702
		0.266708	0.265726		-0.573964	-0.575566
		0.262484	0.276922		-0.580897	-0.557643
		0.261062	0.255319		-0.583256	-0.592917
		0.260692	0.26255		-0.583872	-0.580788
		0.260091	0.264333		-0.584875	-0.577849
		0.260063	0.254173		-0.584921	-0.594871
		0.259075	0.255121		-0.586574	-0.593254
		0.254531	0.262217		-0.594259	-0.581339
		0.25365	0.271413		-0.595765	-0.566369
		0.25341	0.258786		-0.596176	-0.587059
		0.2533	0.26166		-0.596365	-0.582263
		0.251887	0.260671		-0.598794	-0.583907
		0.250387	0.255238		-0.601388	-0.593055
		0.249155	0.253458		-0.60353	-0.596094
		0.24768	0.244527		-0.606109	-0.611673
		0.24705	0.258425		-0.607215	-0.587665
		0.246788	0.220412		-0.607676	-0.656765
		0.245682	0.252474		-0.609627	-0.597783
		0.245277	0.239653		-0.610343	-0.620417
		0.242737	0.238566		-0.614864	-0.622391
		0.242708	0.229197		-0.614916	-0.639791
		0.242214	0.237073		-0.615801	-0.625118
		0.241664	0.257446		-0.616788	-0.589314
		0.24143	0.249126		-0.617209	-0.603581
		0.24094	0.26068		-0.618091	-0.583892
		0.240838	0.2388		-0.618275	-0.621966
		0.240733	0.22877		-0.618464	-0.640601
		0.239877	0.291712		-0.620011	-0.535046
		0.239739	0.241882		-0.620261	-0.616396
		0.23884	0.250813		-0.621893	-0.60065
		0.237865	0.226594		-0.623669	-0.644752
		0.237438	0.226099		-0.62445	-0.645701
		0.237308	0.228389		-0.624688	-0.641325
		0.235046	0.243649		-0.628847	-0.613235
		0.234721	0.218812		-0.629448	-0.659929
		0.233508	0.228297		-0.631698	-0.6415
		0.233226	0.228818		-0.632223	-0.64051
		0.232819	0.239991		-0.632982	-0.619805
		0.23236	0.23898		-0.633839	-0.621638
		0.22965	0.20917		-0.638934	-0.679501
		0.228014	0.241772		-0.642038	-0.616594
		0.227496	0.247948		-0.643026	-0.605639
		0.225065	0.211663		-0.647692	-0.674355
		0.224725	0.215672		-0.648349	-0.666206
		0.223989	0.224248		-0.649773	-0.649271
		0.223876	0.223003		-0.649992	-0.651689
		0.223536	0.228362		-0.650653	-0.641376
		0.222888	0.222645		-0.651913	-0.652387
		0.22169	0.231979		-0.654254	-0.634551
		0.221597	0.231002		-0.654436	-0.636384
		0.220587	0.240404		-0.65642	-0.619058
		0.220527	0.238689		-0.656538	-0.622168
		0.220478	0.217295		-0.656635	-0.66295
		0.218547	0.234045		-0.660455	-0.630701
		0.218156	0.222167		-0.661233	-0.65332
		0.218115	0.18993		-0.661314	-0.721406
		0.216924	0.219675		-0.663692	-0.658219
		0.216292	0.227281		-0.66496	-0.643437
		0.216176	0.195971		-0.665193	-0.707808
		0.215256	0.202063		-0.667045	-0.694513
		0.21518	0.244136		-0.667198	-0.612368
		0.212179	0.213712		-0.673298	-0.670171
		0.211763	0.193558		-0.67415	-0.713189
		0.211522	0.221104		-0.674644	-0.655403
		0.211358	0.196154		-0.674981	-0.707403
		0.210087	0.223944		-0.677601	-0.649861
		0.207676	0.211766		-0.682614	-0.674144
		0.205855	0.218321		-0.686439	-0.660904
		0.20566	0.194891		-0.68685	-0.710208
		0.205572	0.19997		-0.687036	-0.699035
		0.205565	0.195507		-0.687051	-0.708838
		0.204137	0.212884		-0.690078	-0.671857
		0.20302	0.218582		-0.692461	-0.660386
		0.199678	0.201512		-0.69967	-0.695699
		0.19896	0.197644		-0.701234	-0.704116
		0.198668	0.203364		-0.701872	-0.691726
		0.197666	0.193447		-0.704068	-0.713438
		0.197203	0.185315		-0.705086	-0.732089
		0.19632	0.19631		-0.707035	-0.707058
		0.194933	0.191733		-0.710115	-0.717303
		0.194417	0.199716		-0.711266	-0.699587
		0.192861	0.221353		-0.714756	-0.654915
		0.192583	0.176029		-0.715382	-0.754416
		0.191483	0.170683		-0.71787	-0.76781
		0.19144	0.173929		-0.717967	-0.759628
		0.191277	0.18308		-0.718337	-0.737359
		0.190511	0.176132		-0.72008	-0.754162
		0.189898	0.184131		-0.72148	-0.734873
		0.189845	0.183775		-0.721601	-0.735714
		0.188985	0.179292		-0.723573	-0.746439
		0.188581	0.196893		-0.724502	-0.70577
		0.188255	0.182317		-0.725253	-0.739173
		0.188205	0.177109		-0.725369	-0.751759
		0.187194	0.201369		-0.727708	-0.696007
		0.186512	0.178601		-0.729293	-0.748116
		0.186078	0.174438		-0.730305	-0.758359
		0.185999	0.182879		-0.730489	-0.737836
		0.185791	0.186248		-0.730975	-0.729908
		0.185595	0.189195		-0.731434	-0.72309
		0.184463	0.182991		-0.734091	-0.73757
		0.183788	0.185617		-0.735683	-0.731382
		0.182488	0.171814		-0.738766	-0.764941
		0.181989	0.165151		-0.739955	-0.782119
		0.181976	0.180322		-0.739986	-0.743951
		0.181803	0.186336		-0.740399	-0.729703
		0.181224	0.166061		-0.741784	-0.779732
		0.180005	0.164211		-0.744715	-0.784598
		0.179946	0.172719		-0.744858	-0.76266
		0.178719	0.205404		-0.747829	-0.687391
		0.178683	0.167154		-0.747917	-0.776883
		0.178508	0.181322		-0.748342	-0.741549
		0.178257	0.165613		-0.748953	-0.780906
		0.177514	0.182262		-0.750767	-0.739304
		0.177484	0.170035		-0.750841	-0.769462
		0.176283	0.176566		-0.75379	-0.753093
		0.175842	0.169816		-0.754877	-0.770021
		0.175729	0.192774		-0.755157	-0.714952
		0.175714	0.176132		-0.755194	-0.754162
		0.175396	0.165769		-0.75598	-0.780497
		0.17437	0.169005		-0.758528	-0.7721
		0.174008	0.170892		-0.759431	-0.767278
		0.173693	0.177444		-0.760218	-0.750939
		0.173387	0.157004		-0.760983	-0.804089
		0.173152	0.193496		-0.761572	-0.713328
		0.172437	0.16218		-0.76337	-0.790003
		0.171767	0.170007		-0.76506	-0.769533
		0.171497	0.165498		-0.765743	-0.781207
		0.171085	0.152898		-0.766788	-0.815598
		0.171054	0.167012		-0.766867	-0.777252
		0.170896	0.190001		-0.767268	-0.721244
		0.170702	0.171856		-0.767761	-0.764835
		0.170592	0.159989		-0.768041	-0.79591
		0.170038	0.16566		-0.769454	-0.780782
		0.16961	0.179662		-0.770549	-0.745544
		0.16901	0.17553		-0.772088	-0.755649
		0.16858	0.159442		-0.773194	-0.797397
		0.167802	0.153805		-0.775203	-0.81303
		0.16732	0.173854		-0.776452	-0.759815
		0.166984	0.154261		-0.777325	-0.811744
		0.166901	0.175622		-0.777541	-0.755421
		0.166211	0.166955		-0.77934	-0.777401
		0.165855	0.15694		-0.780271	-0.804266
		0.165402	0.177745		-0.781459	-0.750203
		0.164068	0.169044		-0.784976	-0.772
		0.163474	0.16429		-0.786551	-0.784389
		0.162939	0.191651		-0.787975	-0.717489
		0.16249	0.162389		-0.789173	-0.789443
		0.162417	0.169669		-0.789369	-0.770397
		0.161975	0.16748		-0.790552	-0.776037
		0.161798	0.159538		-0.791027	-0.797136
		0.160924	0.149873		-0.793379	-0.824277
		0.160267	0.163159		-0.795156	-0.787389
		0.159761	0.143935		-0.796529	-0.841834
		0.159688	0.145207		-0.796728	-0.838012
		0.159505	0.185435		-0.797226	-0.731808
		0.159129	0.164089		-0.798251	-0.784921
		0.15787	0.186495		-0.8017	-0.729333
		0.157794	0.154563		-0.80191	-0.810894
		0.15738	0.186506		-0.80305	-0.729307
		0.157323	0.151519		-0.803208	-0.819533
		0.156464	0.152969		-0.805586	-0.815397
		0.156307	0.155185		-0.806022	-0.80915
		0.155653	0.156162		-0.807843	-0.806425
		0.155265	0.147055		-0.808926	-0.83252
		0.155182	0.16017		-0.809159	-0.795419
		0.15476	0.17268		-0.810341	-0.762758
		0.154673	0.150308		-0.810585	-0.823018
		0.15381	0.146312		-0.813015	-0.83472
		0.153516	0.156165		-0.813846	-0.806416
		0.153043	0.154806		-0.815187	-0.810212
		0.152433	0.155842		-0.816921	-0.807315
		0.152266	0.133911		-0.817397	-0.873184
		0.151794	0.158583		-0.818745	-0.799743
		0.15163	0.154163		-0.819215	-0.81202
		0.151556	0.130548		-0.819427	-0.88423
		0.150758	0.156776		-0.82172	-0.80472
		0.150084	0.142548		-0.823666	-0.846039
		0.149906	0.154197		-0.824181	-0.811924
		0.149859	0.163172		-0.824317	-0.787354
		0.148914	0.145906		-0.827064	-0.835927
		0.148879	0.150713		-0.827167	-0.821849
		0.148783	0.152044		-0.827447	-0.818031
		0.148683	0.16011		-0.827739	-0.795582
		0.148552	0.141321		-0.828121	-0.849793
		0.147582	0.15231		-0.830967	-0.817272
		0.147555	0.143619		-0.831046	-0.842788
		0.147002	0.149829		-0.832677	-0.824404
		0.146499	0.165704		-0.834165	-0.780667
		0.145558	0.146873		-0.836964	-0.833058
		0.145434	0.139668		-0.837334	-0.854903
		0.144987	0.164332		-0.838671	-0.784278
		0.144564	0.168823		-0.83994	-0.772568
		0.144061	0.144474		-0.841454	-0.84021
		0.143925	0.144939		-0.841864	-0.838815
		0.143463	0.149481		-0.84326	-0.825414
		0.142617	0.167624		-0.845829	-0.775664
		0.141414	0.153872		-0.849508	-0.81284
		0.139933	0.132275		-0.85408	-0.878522
		0.13973	0.14855		-0.85471	-0.828127
		0.139599	0.126216		-0.855118	-0.898886
		0.139094	0.135125		-0.856692	-0.869264
		0.137808	0.128526		-0.860726	-0.891009
		0.137804	0.131676		-0.860738	-0.880493
		0.13772	0.137348		-0.861003	-0.862178
		0.137718	0.117984		-0.861009	-0.928177
		0.13722	0.122381		-0.862583	-0.912286
		0.136807	0.119366		-0.863892	-0.923119
		0.136804	0.133192		-0.863901	-0.875522
		0.135916	0.125183		-0.866729	-0.902455
		0.135345	0.137223		-0.868558	-0.862573
		0.135178	0.149801		-0.869094	-0.824485
		0.134992	0.142955		-0.869692	-0.844801
		0.134482	0.142629		-0.871336	-0.845792
		0.134122	0.145224		-0.8725	-0.837962
		0.133423	0.148178		-0.874769	-0.829216
		0.132693	0.158313		-0.877152	-0.800483
		0.132131	0.121236		-0.878995	-0.916368
		0.131563	0.129143		-0.880866	-0.888929
		0.131166	0.11992		-0.882179	-0.921108
		0.131087	0.128535		-0.88244	-0.890979
		0.131084	0.121737		-0.88245	-0.914577
		0.129949	0.130197		-0.886227	-0.885399
		0.129923	0.133264		-0.886314	-0.875287
		0.127703	0.131927		-0.893799	-0.879666
		0.127522	0.14228		-0.894415	-0.846856
		0.125927	0.130109		-0.899881	-0.885693
		0.125614	0.138534		-0.900962	-0.858444
		0.125495	0.11838		-0.901374	-0.926722
		0.125454	0.126265		-0.901515	-0.898717
		0.124635	0.124936		-0.90436	-0.903312
		0.124527	0.14103		-0.904736	-0.850688
		0.124443	0.114286		-0.90503	-0.942007
		0.122327	0.14271		-0.912478	-0.845546
		0.1222	0.120455		-0.912929	-0.919175
		0.121531	0.123387		-0.915313	-0.908731
		0.121524	0.124215		-0.915338	-0.905826
		0.121366	0.127852		-0.915903	-0.893292
		0.119804	0.111876		-0.921529	-0.951263
		0.117427	0.131132		-0.930232	-0.882291
		0.116286	0.11802		-0.934473	-0.928044
		0.11612	0.121591		-0.935093	-0.915099
		0.115682	0.110076		-0.936734	-0.958307
		0.115165	0.117699		-0.938679	-0.929227
		0.114521	0.1036		-0.941115	-0.98464
		0.114369	0.122179		-0.941692	-0.913003
		0.114007	0.120355		-0.943068	-0.919536
		0.113433	0.104291		-0.945261	-0.981753
		0.113291	0.108523		-0.945805	-0.964478
		0.113248	0.104065		-0.945969	-0.982695
		0.11303	0.110557		-0.946806	-0.956414
		0.112398	0.115072		-0.949241	-0.93903
		0.111652	0.107553		-0.952133	-0.968377
		0.110633	0.0960057		-0.956115	-1.0177
		0.110606	0.128495		-0.956221	-0.891114
		0.110213	0.124936		-0.957767	-0.903312
		0.109927	0.10431		-0.958896	-0.981674
		0.109818	0.107933		-0.959326	-0.966846
		0.109718	0.101587		-0.959722	-0.993162
		0.109675	0.120278		-0.959892	-0.919814
		0.109497	0.0959194		-0.960598	-1.01809
		0.109031	0.110564		-0.96245	-0.956386
		0.108146	0.108993		-0.96599	-0.962601
		0.108024	0.0804924		-0.96648	-1.09425
		0.107951	0.111369		-0.966773	-0.953236
		0.107788	0.108174		-0.96743	-0.965877
		0.107699	0.108164		-0.967788	-0.965917
		0.106898	0.118414		-0.97103	-0.926597
		0.106785	0.104841		-0.97149	-0.979469
		0.106562	0.0945809		-0.972398	-1.0242
		0.106048	0.109941		-0.974498	-0.95884
		0.105932	0.108465		-0.974973	-0.96471
		0.105875	0.11052		-0.975207	-0.956559
		0.105828	0.114998		-0.975399	-0.93931
		0.105737	0.113034		-0.975773	-0.946791
		0.105722	0.118119		-0.975835	-0.92768
		0.105391	0.108054		-0.977196	-0.966359
		0.105184	0.116639		-0.97805	-0.933156
		0.105094	0.113706		-0.978422	-0.944217
		0.104439	0.0992075		-0.981137	-1.00346
		0.104125	0.0938922		-0.982445	-1.02737
		0.104087	0.0912578		-0.982604	-1.03973
		0.104086	0.105053		-0.982608	-0.978592
		0.103163	0.105436		-0.986476	-0.977011
		0.103101	0.0971496		-0.986737	-1.01256
		0.102261	0.0979657		-0.99029	-1.00893
		0.102062	0.0996979		-0.991136	-1.00131
		0.10187	0.107631		-0.991954	-0.968063
		0.101373	0.0879729		-0.994078	-1.05565
		0.101223	0.0980504		-0.994721	-1.00855
		0.100715	0.0908927		-0.996906	-1.04147
		0.100275	0.0918928		-0.998807	-1.03672
		0.100262	0.109194		-0.998864	-0.961801
		0.0998476	0.0940287		-1.00066	-1.02674
		0.099681	0.0856089		-1.00139	-1.06748
		0.0995479	0.0894442		-1.00197	-1.04845
		0.0995009	0.0938061		-1.00217	-1.02777
		0.0994117	0.098808		-1.00256	-1.00521
		0.0993191	0.0968848		-1.00297	-1.01374
		0.0991664	0.0965542		-1.00364	-1.01523
		0.0988848	0.0949529		-1.00487	-1.02249
		0.0987448	0.0873678		-1.00549	-1.05865
		0.0979014	0.100388		-1.00921	-0.998318
		0.0977983	0.09807		-1.00967	-1.00846
		0.0974569	0.101882		-1.01119	-0.991903
		0.096723	0.0943511		-1.01447	-1.02525
		0.0962716	0.0982527		-1.0165	-1.00766
		0.0962009	0.105376		-1.01682	-0.977258
		0.0960896	0.0900942		-1.01732	-1.0453
		0.0959123	0.0867775		-1.01813	-1.06159
		0.0955513	0.0934123		-1.01976	-1.0296
		0.0954524	0.110289		-1.02021	-0.957468
		0.0954295	0.0845713		-1.02032	-1.07278
		0.0952744	0.0946408		-1.02102	-1.02392
		0.0951871	0.0858055		-1.02142	-1.06648
		0.0951539	0.0934145		-1.02157	-1.02959
		0.0949147	0.102245		-1.02267	-0.990358
		0.0948502	0.0901495		-1.02296	-1.04504
		0.0946133	0.0928144		-1.02405	-1.03238
		0.0945389	0.0936216		-1.02439	-1.02862
		0.0942391	0.0790114		-1.02577	-1.10231
		0.0940767	0.095044		-1.02652	-1.02208
		0.09398	0.0863098		-1.02696	-1.06394
		0.0938628	0.100861		-1.02751	-0.996277
		0.0938571	0.0919236		-1.02753	-1.03657
		0.0937993	0.0869914		-1.0278	-1.06052
		0.0936067	0.0838016		-1.02869	-1.07675
		0.0928417	0.0922162		-1.03226	-1.03519
		0.0924817	0.111241		-1.03394	-0.953735
		0.0922813	0.0934269		-1.03489	-1.02953
		0.0921322	0.0798183		-1.03559	-1.0979
		0.0920437	0.0773978		-1.03601	-1.11127
		0.0918252	0.0932176		-1.03704	-1.0305
		0.0915206	0.0871781		-1.03848	-1.05959
		0.0914977	0.0976209		-1.03859	-1.01046
		0.0914203	0.0989998		-1.03896	-1.00437
		0.0911279	0.0962065		-1.04035	-1.0168
		0.0910373	0.0902338		-1.04078	-1.04463
		0.0910197	0.0823895		-1.04086	-1.08413
		0.0901932	0.0813403		-1.04483	-1.08969
		0.090085	0.0953376		-1.04535	-1.02074
		0.0898514	0.0908718		-1.04648	-1.04157
		0.0898193	0.0936688		-1.04663	-1.02841
		0.0895783	0.11128		-1.0478	-0.953583
		0.0894797	0.0963683		-1.04828	-1.01607
		0.0894599	0.0874271		-1.04837	-1.05835
		0.0894493	0.0955393		-1.04842	-1.01982
		0.089269	0.0946746		-1.0493	-1.02377
		0.0891653	0.0994039		-1.0498	-1.0026
		0.0890152	0.0924262		-1.05054	-1.0342
		0.0889155	0.114075		-1.05102	-0.94281
		0.0888235	0.0832145		-1.05147	-1.0798
		0.0888079	0.0878264		-1.05155	-1.05637
		0.0884815	0.0748004		-1.05315	-1.1261
		0.0884652	0.0908867		-1.05323	-1.0415
		0.088413	0.0857485		-1.05348	-1.06677
		0.0883624	0.0827764		-1.05373	-1.08209
		0.0881857	0.0902063		-1.0546	-1.04476
		0.0880351	0.104692		-1.05534	-0.980087
		0.0879225	0.096663		-1.0559	-1.01474
		0.0878868	0.0958914		-1.05608	-1.01822
		0.0878675	0.0949367		-1.05617	-1.02257
		0.0878637	0.101018		-1.05619	-0.995601
		0.0878505	0.0861483		-1.05626	-1.06475
		0.0873653	0.10423		-1.05866	-0.982007
		0.0872793	0.0868874		-1.05909	-1.06104
		0.0871132	0.0957216		-1.05992	-1.01899
		0.0869888	0.0919058		-1.06054	-1.03666
		0.0869137	0.0999639		-1.06091	-1.00016
		0.0868812	0.0814866		-1.06107	-1.08891
		0.0868451	0.0820192		-1.06125	-1.08608
		0.086771	0.083737		-1.06163	-1.07708
		0.0864557	0.0803353		-1.06321	-1.09509
		0.0864103	0.0866978		-1.06343	-1.06199
		0.0863938	0.0801476		-1.06352	-1.09611
		0.0859702	0.0760752		-1.06565	-1.11876
		0.0859615	0.0794564		-1.0657	-1.09987
		0.085899	0.101082		-1.06601	-0.995326
		0.0855501	0.0799476		-1.06778	-1.09719
		0.0855321	0.090017		-1.06787	-1.04568
		0.0854195	0.0852429		-1.06844	-1.06934
		0.0852605	0.0847593		-1.06925	-1.07181
		0.0850836	0.076068		-1.07015	-1.1188
		0.0848737	0.0883123		-1.07123	-1.05398
		0.0847162	0.097561		-1.07203	-1.01072
		0.0846936	0.0930148		-1.07215	-1.03145
		0.0845954	0.0836162		-1.07265	-1.07771
		0.0844212	0.0795209		-1.07355	-1.09952
		0.0843606	0.0768253		-1.07386	-1.1145
		0.0843415	0.0846828		-1.07396	-1.0722
		0.0842641	0.0829671		-1.07436	-1.08109
		0.0841728	0.0723203		-1.07483	-1.14074
		0.08417	0.0777747		-1.07484	-1.10916
		0.0839444	0.0794147		-1.07601	-1.1001
		0.0839363	0.0802759		-1.07605	-1.09541
		0.0837547	0.0878062		-1.07699	-1.05647
		0.08369	0.0775271		-1.07733	-1.11055
		0.0836835	0.0871356		-1.07736	-1.0598
		0.0835496	0.0814061		-1.07806	-1.08934
		0.0834002	0.0898407		-1.07883	-1.04653
		0.0832717	0.0872852		-1.0795	-1.05906
		0.0831731	0.0785616		-1.08002	-1.10479
		0.0830706	0.082151		-1.08055	-1.08539
		0.0830208	0.0763883		-1.08081	-1.11697
		0.0827374	0.0868574		-1.0823	-1.06119
		0.0825984	0.0773853		-1.08303	-1.11134
		0.0825104	0.0849624		-1.08349	-1.07077
		0.0824818	0.0936768		-1.08364	-1.02837
		0.082397	0.0759859		-1.08409	-1.11927
		0.0823918	0.0853659		-1.08412	-1.06872
		0.0823778	0.0877693		-1.08419	-1.05666
		0.0823385	0.0974889		-1.0844	-1.01104
		0.0823235	0.0942599		-1.08448	-1.02567
		0.0822862	0.0759865		-1.08467	-1.11926
		0.0821022	0.0869883		-1.08565	-1.06054
		0.0820896	0.0951197		-1.08571	-1.02173
		0.081525	0.0741168		-1.08871	-1.13008
		0.0815227	0.102192		-1.08872	-0.990583
		0.0814449	0.0787141		-1.08914	-1.10395
		0.0813835	0.0897392		-1.08946	-1.04702
		0.0813702	0.0820145		-1.08953	-1.08611
		0.0813147	0.0714915		-1.08983	-1.14575
		0.0812375	0.0945636		-1.09024	-1.02428
		0.0811886	0.07995		-1.0905	-1.09718
		0.0811649	0.0885254		-1.09063	-1.05293
		0.0810562	0.0836299		-1.09121	-1.07764
		0.080977	0.0702261		-1.09164	-1.1535
		0.0809646	0.0760892		-1.0917	-1.11868
		0.0809537	0.0905821		-1.09176	-1.04296
		0.0809398	0.0783261		-1.09184	-1.10609
		0.0808901	0.0787983		-1.0921	-1.10348
		0.0808744	0.0684972		-1.09219	-1.16433
		0.0806613	0.0818305		-1.09333	-1.08708
		0.0806398	0.0882708		-1.09345	-1.05418
		0.0804658	0.0679496		-1.09439	-1.16781
		0.0803831	0.0742104		-1.09484	-1.12954
		0.080355	0.0738754		-1.09499	-1.1315
		0.0802414	0.0848954		-1.0956	-1.07112
		0.0800784	0.074501		-1.09648	-1.12784
		0.0800617	0.0707028		-1.09658	-1.15056
		0.080061	0.0734896		-1.09658	-1.13377
		0.0800353	0.0793761		-1.09672	-1.10031
		0.0798872	0.0847643		-1.09752	-1.07179
		0.0793084	0.0859908		-1.10068	-1.06555
		0.0790234	0.0880464		-1.10224	-1.05529
		0.0786241	0.0948553		-1.10444	-1.02294
		0.0785988	0.0720483		-1.10458	-1.14238
		0.0782627	0.0716185		-1.10645	-1.14497
		0.0781636	0.0837046		-1.107	-1.07725
		0.0781048	0.0734926		-1.10732	-1.13376
		0.0781028	0.0880482		-1.10733	-1.05528
		0.0779089	0.0825492		-1.10841	-1.08329
		0.0778646	0.0797864		-1.10866	-1.09807
		0.0778272	0.0739691		-1.10887	-1.13095
		0.0778125	0.0798223		-1.10895	-1.09788
		0.0775937	0.0740278		-1.11017	-1.13061
		0.0773596	0.084487		-1.11149	-1.07321
		0.0771444	0.0747326		-1.1127	-1.12649
		0.0771034	0.0992455		-1.11293	-1.00329
		0.076967	0.0727848		-1.1137	-1.13796
		0.0767877	0.0718375		-1.11471	-1.14365
		0.0767193	0.0720387		-1.1151	-1.14243
		0.076672	0.0712673		-1.11536	-1.14711
		0.076601	0.0723839		-1.11577	-1.14036
		0.0764517	0.0868171		-1.11661	-1.06139
		0.0763516	0.0841792		-1.11718	-1.0748
		0.0762318	0.0728537		-1.11786	-1.13755
		0.0762051	0.0650644		-1.11802	-1.18666
		0.0760489	0.0745119		-1.11891	-1.12777
		0.0760145	0.0717753		-1.1191	-1.14402
		0.076	0.0810157		-1.11919	-1.09143
		0.075998	0.0719942		-1.1192	-1.1427
		0.0759644	0.0804517		-1.11939	-1.09446
		0.0759113	0.0803446		-1.11969	-1.09504
		0.0759084	0.0727921		-1.11971	-1.13792
		0.0756659	0.0752439		-1.1211	-1.12353
		0.0756249	0.07447		-1.12134	-1.12802
		0.0754968	0.0605964		-1.12207	-1.21755
		0.0754933	0.0756035		-1.12209	-1.12146
		0.0753632	0.0880224		-1.12284	-1.05541
		0.0753199	0.0795937		-1.12309	-1.09912
		0.0753035	0.0793877		-1.12318	-1.10025
		0.075233	0.0848907		-1.12359	-1.07114
		0.074914	0.0667486		-1.12544	-1.17556
		0.0748679	0.0822586		-1.1257	-1.08482
		0.0748366	0.0801026		-1.12589	-1.09635
		0.0748305	0.0713163		-1.12592	-1.14681
		0.0747364	0.069579		-1.12647	-1.15752
		0.0745031	0.082405		-1.12783	-1.08405
		0.0743811	0.0845478		-1.12854	-1.0729
		0.0743415	0.0788274		-1.12877	-1.10332
		0.0741458	0.0819294		-1.12991	-1.08656
		0.0741133	0.0742024		-1.1301	-1.12958
		0.0739666	0.0765306		-1.13096	-1.11616
		0.0738101	0.0623795		-1.13188	-1.20496
		0.0737245	0.0680344		-1.13239	-1.16727
		0.0736909	0.0748547		-1.13259	-1.12578
		0.073663	0.0791434		-1.13275	-1.10159
		0.0735688	0.082974		-1.13331	-1.08106
		0.0735383	0.076415		-1.13349	-1.11682
		0.0734962	0.0688435		-1.13374	-1.16214
		0.0734824	0.0700831		-1.13382	-1.15439
		0.0734217	0.0691167		-1.13418	-1.16042
		0.0731253	0.069895		-1.13593	-1.15555
		0.073018	0.0691539		-1.13657	-1.16018
		0.0728921	0.070983		-1.13732	-1.14885
		0.0726927	0.070574		-1.13851	-1.15136
		0.0725511	0.0680371		-1.13936	-1.16725
		0.072439	0.0787671		-1.14003	-1.10366
		0.0723919	0.0639496		-1.14031	-1.19416
		0.0723739	0.067422		-1.14042	-1.1712
		0.072006	0.0702952		-1.14263	-1.15307
		0.0719785	0.0723411		-1.1428	-1.14061
		0.0718954	0.0752543		-1.1433	-1.12347
		0.0716499	0.0704036		-1.14478	-1.15241
		0.0716364	0.0697439		-1.14487	-1.15649
		0.0714286	0.0774203		-1.14613	-1.11115
		0.0711886	0.0767253		-1.14759	-1.11506
		0.0710192	0.0730949		-1.14862	-1.13611
		0.0709988	0.0808045		-1.14875	-1.09256
		0.0709787	0.0653085		-1.14887	-1.18503
		0.0709366	0.0664231		-1.14913	-1.17768
		0.070903	0.0694555		-1.14934	-1.15829
		0.0708692	0.0706888		-1.14954	-1.15065
		0.0706594	0.0782752		-1.15083	-1.10638
		0.0706317	0.0740709		-1.151	-1.13035
		0.0705563	0.06		-1.15146	-1.22185
		0.0705557	0.0750042		-1.15147	-1.12491
		0.0703276	0.0708694		-1.15287	-1.14954
		0.0702428	0.067089		-1.1534	-1.17335
		0.0701826	0.080449		-1.15377	-1.09448
		0.0699433	0.0631866		-1.15525	-1.19938
		0.0696344	0.0677366		-1.15718	-1.16918
		0.0696072	0.067802		-1.15735	-1.16876
		0.0696023	0.0686996		-1.15738	-1.16305
		0.0694685	0.0694777		-1.15821	-1.15815
		0.0694547	0.0737805		-1.1583	-1.13206
		0.069449	0.0800484		-1.15833	-1.09665
		0.0693355	0.0714109		-1.15904	-1.14624
		0.0692766	0.067301		-1.15941	-1.17198
		0.0692161	0.0693717		-1.15979	-1.15882
		0.0692026	0.0719824		-1.15988	-1.14277
		0.0690448	0.0683058		-1.16087	-1.16554
		0.0687993	0.0789984		-1.16242	-1.10238
		0.0685544	0.0783228		-1.16396	-1.10611
		0.0684647	0.0717246		-1.16453	-1.14433
		0.0678304	0.0654506		-1.16858	-1.18409
		0.0677246	0.0685823		-1.16925	-1.16379
		0.0675974	0.0586028		-1.17007	-1.23208
		0.0675508	0.0694146		-1.17037	-1.15855
		0.0675116	0.0783145		-1.17062	-1.10616
		0.0674869	0.0772752		-1.17078	-1.11196
		0.0671509	0.0652728		-1.17295	-1.18527
		0.0670262	0.0665957		-1.17376	-1.17655
		0.0665633	0.0712831		-1.17677	-1.14701
		0.0663714	0.0604205		-1.17802	-1.21882
		0.0662683	0.0722726		-1.17869	-1.14103
		0.0662467	0.0755773		-1.17884	-1.12161
		0.0661832	0.0697372		-1.17925	-1.15654
		0.0659991	0.0631898		-1.18046	-1.19935
		0.0659007	0.0627697		-1.18111	-1.20225
		0.0658584	0.0673171		-1.18139	-1.17187
		0.0658202	0.0571831		-1.18164	-1.24273
		0.0658199	0.0670154		-1.18164	-1.17383
		0.0653958	0.0687717		-1.18445	-1.16259
		0.0653928	0.0628386		-1.18447	-1.20177
		0.0653746	0.0682808		-1.18459	-1.1657
		0.0653648	0.0659996		-1.18466	-1.18046
		0.0653186	0.0657548		-1.18496	-1.18207
		0.0652875	0.0638106		-1.18517	-1.19511
		0.0650783	0.0643642		-1.18656	-1.19136
		0.0649943	0.0568261		-1.18712	-1.24545
		0.0649535	0.0715786		-1.1874	-1.14522
		0.0648775	0.0622429		-1.18791	-1.20591
		0.064744	0.0629855		-1.1888	-1.20076
		0.0646702	0.0679245		-1.1893	-1.16797
		0.0646385	0.0581146		-1.18951	-1.23571
		0.0641147	0.0658706		-1.19304	-1.18131
		0.0639219	0.0649015		-1.19435	-1.18775
		0.0639033	0.06679		-1.19448	-1.17529
		0.063659	0.0681115		-1.19614	-1.16678
		0.0636577	0.0656305		-1.19615	-1.18289
		0.0636115	0.0632589		-1.19646	-1.19888
		0.0629745	0.063786		-1.20084	-1.19527
		0.0629416	0.06505		-1.20106	-1.18675
		0.0629148	0.0695373		-1.20125	-1.15778
		0.0627002	0.058199		-1.20273	-1.23508
		0.0626576	0.0604071		-1.20303	-1.21891
		0.0624822	0.056643		-1.20424	-1.24685
		0.0620843	0.0625721		-1.20702	-1.20362
		0.0620169	0.0687514		-1.20749	-1.16272
		0.0619379	0.0683283		-1.20804	-1.1654
		0.061812	0.0616584		-1.20893	-1.21001
		0.0614179	0.0594833		-1.21171	-1.2256
		0.0611443	0.0579589		-1.21364	-1.23688
		0.0611183	0.0592587		-1.21383	-1.22725
		0.0610324	0.0638003		-1.21444	-1.19518
		0.0608935	0.0684764		-1.21543	-1.16446
		0.0608533	0.0699271		-1.21572	-1.15535
		0.0608267	0.0568486		-1.21591	-1.24528
		0.0608259	0.0602363		-1.21591	-1.22014
		0.0606763	0.0617222		-1.21698	-1.20956
		0.0606524	0.0595591		-1.21715	-1.22505
		0.0605636	0.061194		-1.21779	-1.21329
		0.0604986	0.0664727		-1.21825	-1.17736
		0.0604143	0.0601085		-1.21886	-1.22106
		0.0603527	0.0596064		-1.2193	-1.22471
		0.060328	0.0651492		-1.21948	-1.18609
		0.0602319	0.0601536		-1.22017	-1.22074
		0.0602128	0.0585163		-1.22031	-1.23272
		0.0601689	0.0632512		-1.22063	-1.19893
		0.0597053	0.0605402		-1.22399	-1.21796
		0.0593336	0.0646871		-1.2267	-1.18918
		0.0592863	0.0626986		-1.22705	-1.20274
		0.0591799	0.0649413		-1.22783	-1.18748
		0.0590087	0.0621887		-1.22908	-1.20629
		0.0589879	0.0528664		-1.22924	-1.27682
		0.0589758	0.0540356		-1.22933	-1.26732
		0.0589636	0.0638632		-1.22942	-1.19475
		0.0589416	0.0539132		-1.22958	-1.2683
		0.0588988	0.0594888		-1.22989	-1.22556
		0.058871	0.0819287		-1.2301	-1.08656
		0.0588128	0.0500232		-1.23053	-1.30083
		0.058787	0.0704607		-1.23072	-1.15205
		0.0586474	0.0609811		-1.23175	-1.2148
		0.0584932	0.0565505		-1.23289	-1.24756
		0.0584651	0.0527497		-1.2331	-1.27778
		0.0582681	0.0546259		-1.23457	-1.2626
		0.0579027	0.0592272		-1.2373	-1.22748
		0.0578454	0.0517429		-1.23773	-1.28615
		0.0572324	0.0617389		-1.24236	-1.20944
		0.057211	0.0418365		-1.24252	-1.37844
		0.0570003	0.0510898		-1.24412	-1.29167
		0.0569658	0.0529435		-1.24439	-1.27619
		0.0566893	0.0589136		-1.2465	-1.22978
		0.0564753	0.0473871		-1.24814	-1.32434
		0.0564484	0.05095		-1.24835	-1.29286
		0.0561611	0.0547021		-1.25056	-1.262
		0.0561008	0.0639852		-1.25103	-1.19392
		0.0559707	0.0597099		-1.25204	-1.22395
		0.0558041	0.0640473		-1.25333	-1.1935
		0.0555331	0.0529997		-1.25545	-1.27573
		0.0553519	0.0523649		-1.25687	-1.28096
		0.0551467	0.0575181		-1.25848	-1.2402
		0.0551323	0.0504424		-1.25859	-1.2972
		0.0550117	0.0560443		-1.25954	-1.25147
		0.0548216	0.0507402		-1.26105	-1.29465
		0.0546433	0.0506927		-1.26246	-1.29505
		0.0545893	0.0540937		-1.26289	-1.26685
		0.0545455	0.053414		-1.26324	-1.27234
		0.0545062	0.0459216		-1.26355	-1.33798
		0.0543742	0.0562352		-1.26461	-1.24999
		0.0542623	0.0505705		-1.2655	-1.2961
		0.0541634	0.05881		-1.26629	-1.23055
		0.0541394	0.0605858		-1.26649	-1.21763
		0.0539899	0.0488414		-1.26769	-1.31121
		0.0539693	0.0459313		-1.26785	-1.33789
		0.0537355	0.0543953		-1.26974	-1.26444
		0.0536558	0.0529659		-1.27038	-1.276
		0.0535714	0.0549339		-1.27107	-1.26016
		0.0535483	0.0570776		-1.27125	-1.24353
		0.0534262	0.0465628		-1.27225	-1.33196
		0.0533841	0.0460526		-1.27259	-1.33675
		0.0531432	0.0499641		-1.27455	-1.30134
		0.0530606	0.0447653		-1.27523	-1.34906
		0.0529915	0.0425568		-1.27579	-1.37103
		0.052937	0.0574766		-1.27624	-1.24051
		0.0529243	0.052375		-1.27634	-1.28088
		0.052897	0.0602999		-1.27657	-1.21968
		0.0521868	0.0470905		-1.28244	-1.32707
		0.0520109	0.0584585		-1.28391	-1.23315
		0.0515738	0.0521332		-1.28757	-1.28289
		0.0512765	0.0554367		-1.29008	-1.2562
		0.0511859	0.0508029		-1.29085	-1.29411
		0.0511573	0.0555921		-1.29109	-1.25499
		0.051025	0.0552378		-1.29222	-1.25776
		0.0509711	0.0449083		-1.29268	-1.34767
		0.0507092	0.0407848		-1.29491	-1.3895
		0.0506312	0.0591484		-1.29558	-1.22806
		0.0505203	0.053084		-1.29653	-1.27504
		0.0504919	0.0501771		-1.29678	-1.29949
		0.0503078	0.0513275		-1.29836	-1.28965
		0.050305	0.0506364		-1.29839	-1.29554
		0.0500274	0.0557908		-1.30079	-1.25344
		0.0498008	0.0472376		-1.30276	-1.32571
		0.049795	0.0464365		-1.30281	-1.33314
		0.0494966	0.0458149		-1.30542	-1.33899
		0.0494494	0.0400442		-1.30584	-1.39746
		0.0491122	0.0455696		-1.30881	-1.34132
		0.0490781	0.0434086		-1.30911	-1.36242
		0.0488829	0.054082		-1.31084	-1.26695
		0.0488436	0.0389188		-1.31119	-1.40984
		0.0487284	0.0439436		-1.31222	-1.3571
		0.0485184	0.053211		-1.31409	-1.274
		0.0485	0.0429023		-1.31426	-1.36752
		0.0484129	0.0540712		-1.31504	-1.26703
		0.0480942	0.046943		-1.31791	-1.32843
		0.0477044	0.0429444		-1.32144	-1.36709
		0.047299	0.051763		-1.32515	-1.28598
		0.047074	0.054803		-1.32722	-1.2612
		0.0470286	0.0449578		-1.32764	-1.34719
		0.0468798	0.0519843		-1.32901	-1.28413
		0.0468258	0.0433018		-1.32951	-1.36349
		0.0464755	0.0453923		-1.33278	-1.34302
		0.046386	0.0445287		-1.33361	-1.35136
		0.0462693	0.0457216		-1.33471	-1.33988
		0.0462552	0.0527716		-1.33484	-1.2776
		0.0460777	0.0430796		-1.33651	-1.36573
		0.046036	0.0492351		-1.3369	-1.30773
		0.0459416	0.0420088		-1.33779	-1.37666
		0.0458389	0.0474716		-1.33877	-1.32357
		0.0455998	0.0450161		-1.34104	-1.34663
		0.0452761	0.0429817		-1.34413	-1.36672
		0.0451178	0.0438383		-1.34565	-1.35815
		0.0450318	0.0504191		-1.34648	-1.2974
		0.0450178	0.0487842		-1.34662	-1.31172
		0.0444065	0.0459141		-1.35255	-1.33805
		0.0443265	0.0406997		-1.35334	-1.39041
		0.0440656	0.0377475		-1.3559	-1.42311
		0.0438922	0.0446825		-1.35761	-1.34986
		0.0437739	0.0518669		-1.35878	-1.28511
		0.0437565	0.0394566		-1.35896	-1.40388
		0.0435986	0.0383065		-1.36053	-1.41673
		0.0434875	0.0429773		-1.36164	-1.36676
		0.0433522	0.0375224		-1.36299	-1.42571
		0.0433051	0.0471575		-1.36346	-1.32645
		0.0425172	0.0338402		-1.37144	-1.47057
		0.0424041	0.0433131		-1.37259	-1.36338
		0.0421023	0.0573167		-1.37569	-1.24172
		0.0420222	0.0407858		-1.37652	-1.38949
		0.0417954	0.041567		-1.37887	-1.38125
		0.0414358	0.0362075		-1.38262	-1.4412
		0.0413728	0.0373459		-1.38329	-1.42776
		0.0412601	0.0330853		-1.38447	-1.48036
		0.0406615	0.0369351		-1.39082	-1.43256
		0.0406399	0.0399756		-1.39105	-1.39821
		0.0405136	0.0391708		-1.3924	-1.40704
		0.0403551	0.0399091		-1.3941	-1.39893
		0.0402237	0.0430091		-1.39552	-1.36644
		0.0398959	0.04226		-1.39907	-1.37407
		0.0395651	0.0426715		-1.40269	-1.36986
		0.0392791	0.0383428		-1.40584	-1.41632
		0.0391946	0.0347244		-1.40677	-1.45937
		0.0390844	0.0357516		-1.408	-1.4467
		0.0390829	0.0364075		-1.40801	-1.43881
		0.0387977	0.0311945		-1.41119	-1.50592
		0.0387097	0.0337063		-1.41218	-1.47229
		0.0386325	0.0336346		-1.41305	-1.47321
		0.0385251	0.0347088		-1.41426	-1.45956
		0.0385196	0.0351544		-1.41432	-1.45402
		0.0381628	0.0399928		-1.41836	-1.39802
		0.0381089	0.0423468		-1.41897	-1.37318
		0.038084	0.0401572		-1.41926	-1.39624
		0.0378588	0.0348425		-1.42183	-1.45789
		0.0378215	0.043956		-1.42226	-1.35698
		0.0377797	0.0401098		-1.42274	-1.39675
		0.0374071	0.0402094		-1.42705	-1.39567
		0.0373211	0.0387913		-1.42805	-1.41127
		0.0372303	0.040721		-1.4291	-1.39018
		0.0371542	0.041009		-1.42999	-1.38712
		0.0371239	0.040096		-1.43035	-1.3969
		0.0370315	0.0426292		-1.43143	-1.37029
		0.0365911	0.0416219		-1.43662	-1.38068
		0.0364452	0.0522992		-1.43836	-1.2815
		0.0362025	0.0313006		-1.44126	-1.50445
		0.0361777	0.0358238		-1.44156	-1.44583
		0.0359897	0.0379587		-1.44382	-1.42069
		0.0359049	0.0335409		-1.44485	-1.47443
		0.0358686	0.0357066		-1.44529	-1.44725
		0.0358677	0.0362567		-1.4453	-1.44061
		0.0356482	0.0346382		-1.44796	-1.46044
		0.035611	0.0389437		-1.44842	-1.40956
		0.0351818	0.033005		-1.45368	-1.48142
		0.0350962	0.0279386		-1.45474	-1.5538
		0.0348938	0.0350674		-1.45725	-1.4551
		0.0348322	0.0297793		-1.45802	-1.52609
		0.0344283	0.0339827		-1.46308	-1.46874
		0.0343291	0.0318421		-1.46434	-1.497
		0.0341107	0.0348814		-1.46711	-1.45741
		0.0341019	0.0386037		-1.46722	-1.41337
		0.0333701	0.0337791		-1.47664	-1.47135
		0.0333424	0.0342428		-1.477	-1.46543
		0.0330436	0.0311511		-1.48091	-1.50653
		0.0330417	0.0382488		-1.48094	-1.41738
		0.0329695	0.0283103		-1.48189	-1.54806
		0.0327886	0.0317345		-1.48428	-1.49847
		0.0327547	0.032575		-1.48473	-1.48712
		0.0327026	0.0435685		-1.48542	-1.36083
		0.0325458	0.0391179		-1.48751	-1.40762
		0.032408	0.0279266		-1.48935	-1.55398
		0.0323401	0.0302976		-1.49026	-1.51859
		0.0321961	0.0231065		-1.4922	-1.63627
		0.0320048	0.0339773		-1.49478	-1.46881
		0.0318021	0.0366078		-1.49754	-1.43643
		0.0317043	0.0317992		-1.49888	-1.49758
		0.0317036	0.0327058		-1.49889	-1.48538
		0.0316456	0.0329389		-1.49969	-1.48229
		0.0316231	0.0276901		-1.5	-1.55768
		0.031357	0.0285919		-1.50367	-1.54376
		0.0310996	0.0285113		-1.50725	-1.54498
		0.0308739	0.0361428		-1.51041	-1.44198
		0.0308703	0.0382409		-1.51046	-1.41747
		0.0305167	0.0322111		-1.51546	-1.49199
		0.0304215	0.0302654		-1.51682	-1.51905
		0.0301874	0.0227641		-1.52017	-1.64275
		0.0299461	0.0296786		-1.52366	-1.52756
		0.0298703	0.0350334		-1.52476	-1.45552
		0.0298339	0.0239888		-1.52529	-1.61999
		0.0294215	0.0302834		-1.53134	-1.5188
		0.029381	0.0274041		-1.53193	-1.56218
		0.0293521	0.0327434		-1.53236	-1.48488
		0.0292379	0.0277193		-1.53405	-1.55722
		0.0291716	0.0289086		-1.53504	-1.53897
		0.0290839	0.0218765		-1.53635	-1.66002
		0.0289924	0.0244912		-1.53772	-1.61099
		0.0289493	0.0283672		-1.53836	-1.54718
		0.0288945	0.0250093		-1.53918	-1.6019
		0.028752	0.0288969		-1.54133	-1.53915
		0.0285072	0.0276383		-1.54505	-1.55849
		0.028467	0.0186951		-1.54566	-1.72827
		0.0284254	0.0148472		-1.54629	-1.82836
		0.028348	0.032		-1.54748	-1.49485
		0.0282392	0.0342566		-1.54915	-1.46526
		0.0281747	0.0293978		-1.55014	-1.53169
		0.0280939	0.0258325		-1.55139	-1.58783
		0.0280411	0.0243774		-1.5522	-1.61301
		0.0280232	0.0236954		-1.55248	-1.62534
		0.0279679	0.0281344		-1.55334	-1.55076
		0.0279227	0.0238496		-1.55404	-1.62252
		0.0278287	0.0234894		-1.55551	-1.62913
		0.0277814	0.0231848		-1.55625	-1.6348
		0.0276451	0.0246479		-1.55838	-1.60822
		0.027437	0.0266693		-1.56166	-1.57399
		0.0274352	0.028346		-1.56169	-1.54751
		0.0273143	0.0279536		-1.56361	-1.55356
		0.027234	0.0298834		-1.56489	-1.52457
		0.0271624	0.0291136		-1.56603	-1.5359
		0.0271597	0.0284529		-1.56608	-1.54587
		0.0271567	0.0303951		-1.56612	-1.5172
		0.0271485	0.0291262		-1.56625	-1.53572
		0.0270764	0.0256151		-1.56741	-1.5915
		0.0270177	0.0290312		-1.56835	-1.53714
		0.026995	0.0284428		-1.56872	-1.54603
		0.0269392	0.0214044		-1.56962	-1.6695
		0.0269131	0.0308298		-1.57004	-1.51103
		0.0268489	0.0282733		-1.57107	-1.54862
		0.0268364	0.0263572		-1.57128	-1.5791
		0.0267734	0.0271072		-1.5723	-1.56692
		0.0267699	0.0276264		-1.57235	-1.55868
		0.0267677	0.020261		-1.57239	-1.69334
		0.0262049	0.0295987		-1.58162	-1.52873
		0.0261885	0.0262253		-1.58189	-1.58128
		0.0261426	0.0214082		-1.58265	-1.66942
		0.0260078	0.0216155		-1.5849	-1.66523
		0.0259892	0.0303534		-1.58521	-1.51779
		0.0259246	0.0178938		-1.58629	-1.7473
		0.0259097	0.02748		-1.58654	-1.56098
		0.0258057	0.0473615		-1.58828	-1.32457
		0.0257799	0.0289845		-1.58872	-1.53783
		0.0256697	0.0266194		-1.59058	-1.5748
		0.0255616	0.0241028		-1.59241	-1.61793
		0.0254877	0.0241665		-1.59367	-1.61679
		0.0254503	0.0279749		-1.59431	-1.55323
		0.0253356	0.0304693		-1.59627	-1.51614
		0.0253229	0.0205605		-1.59649	-1.68697
		0.0253132	0.0275229		-1.59665	-1.56031
		0.0253111	0.0282751		-1.59669	-1.5486
		0.0253111	0.0254338		-1.59669	-1.59459
		0.0251956	0.0283019		-1.59868	-1.54818
		0.0250734	0.0257824		-1.60079	-1.58868
		0.0248544	0.0319827		-1.6046	-1.49508
		0.0247372	0.0221418		-1.60665	-1.65479
		0.0246491	0.0242634		-1.6082	-1.61505
		0.0246244	0.0279194		-1.60863	-1.55409
		0.0244726	0.0164609		-1.61132	-1.78355
		0.024186	0.0217913		-1.61644	-1.66172
		0.0241485	0.0241627		-1.61711	-1.61685
		0.0241006	0.0123935		-1.61797	-1.90681
		0.0240006	0.024787		-1.61978	-1.60578
		0.0239941	0.022996		-1.6199	-1.63835
		0.0239791	0.020604		-1.62017	-1.68605
		0.0239316	0.0280962		-1.62103	-1.55135
		0.023887	0.0194976		-1.62184	-1.71002
		0.0238699	0.0233137		-1.62215	-1.63239
		0.0237982	0.0232716		-1.62346	-1.63317
		0.0237419	0.0249975		-1.62448	-1.6021
		0.0237377	0.0242531		-1.62456	-1.61523
		0.0236686	0.0188886		-1.62583	-1.7238
		0.0236188	0.022462		-1.62674	-1.64855
		0.0234661	0.0184508		-1.62956	-1.73398
		0.0233881	0.0216019		-1.63101	-1.66551
		0.023211	0.0234398		-1.63431	-1.63005
		0.023114	0.0290765		-1.63612	-1.53646
		0.0228259	0.0211071		-1.64157	-1.67557
		0.0228181	0.0168322		-1.64172	-1.77386
		0.0228059	0.0246592		-1.64195	-1.60802
		0.0227694	0.0260471		-1.64265	-1.58424
		0.0227667	0.0259632		-1.6427	-1.58564
		0.0226468	0.0209942		-1.64499	-1.6779
		0.0225913	0.0190684		-1.64606	-1.71969
		0.0225765	0.0237136		-1.64634	-1.625
		0.0225612	0.0267552		-1.64664	-1.57259
		0.0223609	0.0255443		-1.65051	-1.59271
		0.0223559	0.0185203		-1.65061	-1.73235
		0.0223454	0.0225493		-1.65081	-1.64687
		0.0222914	0.0186807		-1.65186	-1.72861
		0.0221834	0.0200292		-1.65397	-1.69834
		0.0220845	0.0184143		-1.65591	-1.73484
		0.0220483	0.0113332		-1.65662	-1.94565
		0.0219892	0.0213333		-1.65779	-1.67094
		0.0218795	0.0196871		-1.65996	-1.70582
		0.021779	0.0244507		-1.66196	-1.61171
		0.0216738	0.0242921		-1.66406	-1.61453
		0.0216084	0.0284075		-1.66538	-1.54657
		0.021574	0.0190599		-1.66607	-1.71988
		0.0215246	0.0240349		-1.66706	-1.61916
		0.0215024	0.0246783		-1.66751	-1.60768
		0.0214757	0.019673		-1.66805	-1.70613
		0.0214044	0.0213044		-1.6695	-1.67153
		0.0213563	0.0202408		-1.67047	-1.69377
		0.0213337	0.0192917		-1.67093	-1.71463
		0.0213335	0.0196211		-1.67094	-1.70728
		0.0212474	0.0246673		-1.67269	-1.60788
		0.0212223	0.019537		-1.67321	-1.70914
		0.0212035	0.0245314		-1.67359	-1.61028
		0.0212012	0.0237512		-1.67364	-1.62431
		0.0211974	0.0267682		-1.67372	-1.57238
		0.0210864	0.0202698		-1.676	-1.69315
		0.0210456	0.0106924		-1.67684	-1.97092
		0.0210351	0.0180592		-1.67706	-1.7433
		0.0209813	0.0265517		-1.67817	-1.57591
		0.0209136	0.0270684		-1.67957	-1.56754
		0.0208212	0.0220693		-1.68149	-1.65621
		0.0207787	0.0220214		-1.68238	-1.65716
		0.0207676	0.0189443		-1.68261	-1.72252
		0.0206236	0.0210464		-1.68564	-1.67682
		0.0205128	0.0276999		-1.68798	-1.55752
		0.0204201	0.0177359		-1.68994	-1.75115
		0.0203419	0.0182116		-1.69161	-1.73965
		0.020329	0.0181907		-1.69188	-1.74015
		0.0202259	0.0240329		-1.69409	-1.61919
		0.0202244	0.0196566		-1.69412	-1.70649
		0.0202098	0.0194295		-1.69444	-1.71154
		0.0202061	0.0206867		-1.69452	-1.68431
		0.0201462	0.0224096		-1.69581	-1.64957
		0.0200398	0.021925		-1.69811	-1.65906
		0.0200314	0.0183546		-1.69829	-1.73626
		0.0200229	0.0152813		-1.69847	-1.81584
		0.0199723	0.0171625		-1.69957	-1.76542
		0.019951	0.0181922		-1.70004	-1.74011
		0.0199284	0.0156201		-1.70053	-1.80632
		0.0198999	0.0181366		-1.70115	-1.74144
		0.0198785	0.0209581		-1.70162	-1.67865
		0.0198611	0.0213602		-1.702	-1.67039
		0.0198255	0.0176855		-1.70278	-1.75238
		0.0197425	0.0169212		-1.7046	-1.77157
		0.0197404	0.0204105		-1.70464	-1.69015
		0.0196985	0.0229449		-1.70557	-1.63931
		0.0196934	0.0211281		-1.70568	-1.67514
		0.0196474	0.0234835		-1.70669	-1.62924
		0.0195129	0.00872441		-1.70968	-2.05926
		0.0195084	0.0195783		-1.70978	-1.70823
		0.0194175	0.0199011		-1.71181	-1.70112
		0.0194076	0.019306		-1.71203	-1.71431
		0.0193836	0.0165591		-1.71257	-1.78096
		0.0192885	0.0199671		-1.7147	-1.69969
		0.0191812	0.0209891		-1.71712	-1.67801
		0.0191802	0.0194836		-1.71715	-1.71033
		0.0191324	0.0156075		-1.71823	-1.80667
		0.0191274	0.01469		-1.71834	-1.83298
		0.01912	0.0217047		-1.71851	-1.66345
		0.019084	0.0125264		-1.71933	-1.90217
		0.0190416	0.0180565		-1.7203	-1.74337
		0.0190072	0.0156141		-1.72108	-1.80648
		0.018985	0.015315		-1.72159	-1.81488
		0.0189836	0.0218305		-1.72162	-1.66094
		0.0189408	0.0155447		-1.7226	-1.80842
		0.0188486	0.0173661		-1.72472	-1.7603
		0.0188403	0.0164855		-1.72491	-1.7829
		0.0188283	0.018807		-1.72519	-1.72568
		0.0188088	0.0209174		-1.72564	-1.67949
		0.0187991	0.0183701		-1.72586	-1.73589
		0.0187434	0.0194719		-1.72715	-1.71059
		0.0187036	0.00916774		-1.72807	-2.03774
		0.0186923	0.0164894		-1.72834	-1.7828
		0.0186151	0.0145628		-1.73013	-1.83676
		0.0185664	0.0183569		-1.73127	-1.7362
		0.0185287	0.0198244		-1.73216	-1.7028
		0.01851	0.0159161		-1.73259	-1.79816
		0.0184898	0.0148181		-1.73307	-1.82921
		0.0184763	0.0161838		-1.73338	-1.79092
		0.018453	0.0187912		-1.73393	-1.72605
		0.0184415	0.0193116		-1.7342	-1.71418
		0.018406	0.0204049		-1.73504	-1.69027
		0.0183869	0.0195298		-1.73549	-1.7093
		0.0183223	0.0140771		-1.73702	-1.85149
		0.0182916	0.0188986		-1.73775	-1.72357
		0.0182	0.0204113		-1.73993	-1.69013
		0.0181839	0.0185105		-1.74031	-1.73258
		0.0181151	0.0171145		-1.74196	-1.76664
		0.0180514	0.0187241		-1.74349	-1.7276
		0.0179969	0.0140593		-1.7448	-1.85204
		0.0179866	0.0141164		-1.74505	-1.85028
		0.017965	0.0177932		-1.74557	-1.74975
		0.0179619	0.0184494		-1.74565	-1.73402
		0.0179568	0.0118718		-1.74577	-1.92548
		0.0177868	0.0185372		-1.7499	-1.73196
		0.0177011	0.0195155		-1.752	-1.70962
		0.0176528	0.0232789		-1.75319	-1.63304
		0.0176372	0.0166894		-1.75357	-1.77756
		0.0176222	0.017873		-1.75394	-1.7478
		0.017555	0.0175425		-1.7556	-1.75591
		0.0175399	0.0141894		-1.75597	-1.84804
		0.0175206	0.0199895		-1.75645	-1.6992
		0.0174603	0.0161613		-1.75795	-1.79152
		0.017439	0.0186409		-1.75848	-1.72953
		0.0174158	0.0185652		-1.75906	-1.7313
		0.0173388	0.0189617		-1.76098	-1.72212
		0.0173285	0.016369		-1.76124	-1.78598
		0.01731	0.0186856		-1.7617	-1.72849
		0.0172612	0.0157319		-1.76293	-1.80322
		0.0172518	0.0199072		-1.76317	-1.70099
		0.017184	0.0188667		-1.76488	-1.7243
		0.0171508	0.0173336		-1.76572	-1.76111
		0.0170758	0.0165668		-1.76762	-1.78076
		0.0170501	0.021236		-1.76827	-1.67293
		0.0170414	0.0179705		-1.76849	-1.74544
		0.0170259	0.0138435		-1.76889	-1.85875
		0.0170222	0.0134335		-1.76898	-1.87181
		0.016862	0.0202343		-1.77309	-1.69391
		0.0168543	0.0162293		-1.77329	-1.7897
		0.0168517	0.014276		-1.77336	-1.84539
		0.0168269	0.0192263		-1.774	-1.7161
		0.016824	0.0178611		-1.77407	-1.74809
		0.0168024	0.0153553		-1.77463	-1.81374
		0.0167951	0.0190747		-1.77482	-1.71954
		0.0167739	0.0176831		-1.77537	-1.75244
		0.0167472	0.0184697		-1.77606	-1.73354
		0.0167414	0.0160443		-1.77621	-1.79468
		0.0167082	0.0166902		-1.77707	-1.77754
		0.0167074	0.00793103		-1.77709	-2.10067
		0.0166911	0.0177531		-1.77752	-1.75073
		0.0165839	0.0151782		-1.78031	-1.81878
		0.0165527	0.0187751		-1.78113	-1.72642
		0.0165289	0.0174716		-1.78176	-1.75767
		0.0165264	0.015873		-1.78182	-1.79934
		0.0165189	0.0164552		-1.78202	-1.7837
		0.0164662	0.0171509		-1.78341	-1.76571
		0.0163472	0.0120185		-1.78656	-1.92015
		0.0163265	0.0179053		-1.78711	-1.74702
		0.0163177	0.0166378		-1.78734	-1.7789
		0.0163166	0.0132247		-1.78737	-1.87861
		0.016291	0.0167584		-1.78805	-1.77577
		0.0162875	0.017932		-1.78815	-1.74637
		0.0161535	0.0163545		-1.79173	-1.78636
		0.0161056	0.0156853		-1.79302	-1.80451
		0.0160709	0.0146224		-1.79396	-1.83498
		0.0160648	0.0172515		-1.79412	-1.76317
		0.0160337	0.015677		-1.79497	-1.80474
		0.0160264	0.0188569		-1.79516	-1.72453
		0.0160124	0.01389		-1.79554	-1.8573
		0.0159993	0.0200689		-1.7959	-1.69748
		0.0159453	0.0133682		-1.79737	-1.87393
		0.015916	0.0168278		-1.79817	-1.77397
		0.015868	0.0128247		-1.79948	-1.89195
		0.015865	0.0142281		-1.79956	-1.84685
		0.0158594	0.0184049		-1.79971	-1.73507
		0.015765	0.0161954		-1.80231	-1.79061
		0.0157484	0.0152632		-1.80276	-1.81635
		0.0156845	0.0155475		-1.80453	-1.80834
		0.0156684	0.0144257		-1.80498	-1.84086
		0.0156376	0.014935		-1.80583	-1.82579
		0.0155685	0.0178893		-1.80775	-1.74741
		0.015516	0.0156101		-1.80922	-1.80659
		0.0154763	0.0161616		-1.81033	-1.79152
		0.0154699	0.0159651		-1.81051	-1.79683
		0.0154197	0.0179924		-1.81192	-1.74491
		0.0153979	0.0161194		-1.81254	-1.79265
		0.0153652	0.0214728		-1.81346	-1.66811
		0.0153453	0.0193492		-1.81402	-1.71334
		0.0153365	0.0114128		-1.81427	-1.94261
		0.0153095	0.0143646		-1.81504	-1.84271
		0.0153061	0.0134405		-1.81514	-1.87158
		0.0153051	0.0137545		-1.81516	-1.86156
		0.0152887	0.0175575		-1.81563	-1.75554
		0.0152715	0.0150974		-1.81612	-1.8211
		0.0152683	0.0107707		-1.81621	-1.96776
		0.0152515	0.0155216		-1.81669	-1.80906
		0.0152475	0.0188795		-1.8168	-1.72401
		0.0152434	0.0151699		-1.81692	-1.81902
		0.0152224	0.00907044		-1.81752	-2.04237
		0.015167	0.0157662		-1.8191	-1.80227
		0.0151493	0.0178094		-1.81961	-1.74935
		0.015146	0.0171621		-1.8197	-1.76543
		0.015135	0.0169507		-1.82002	-1.77081
		0.0151307	0.0132533		-1.82014	-1.87768
		0.0151214	0.0126237		-1.82041	-1.89881
		0.0151135	0.0168586		-1.82063	-1.77318
		0.015093	0.0148696		-1.82122	-1.8277
		0.0150563	0.0160927		-1.82228	-1.79337
		0.015052	0.0145807		-1.82241	-1.83622
		0.0150514	0.0140977		-1.82242	-1.85085
		0.0150425	0.011855		-1.82268	-1.9261
		0.0150381	0.0114879		-1.82281	-1.93976
		0.015031	0.0115229		-1.82301	-1.93844
		0.0149945	0.0122421		-1.82407	-1.91214
		0.0149856	0.0134512		-1.82433	-1.87124
		0.0149646	0.0182652		-1.82493	-1.73838
		0.0149484	0.0195943		-1.82541	-1.70787
		0.0148523	0.0118281		-1.82821	-1.92709
		0.0148343	0.0131972		-1.82873	-1.87952
		0.0148307	0.0130586		-1.82884	-1.8841
		0.0148045	0.0125064		-1.82961	-1.90287
		0.0147872	0.0149846		-1.83011	-1.82435
		0.014752	0.0101961		-1.83115	-1.99157
		0.0147362	0.0176156		-1.83161	-1.7541
		0.0147103	0.0142261		-1.83238	-1.84691
		0.0146958	0.0181579		-1.83281	-1.74093
		0.0146924	0.0122111		-1.83291	-1.91325
		0.0146661	0.00938865		-1.83369	-2.0274
		0.0146387	0.0130928		-1.8345	-1.88297
		0.0146341	0.0135617		-1.83463	-1.86769
		0.014626	0.011088		-1.83487	-1.95515
		0.0145858	0.0128319		-1.83607	-1.89171
		0.0145809	0.0177274		-1.83622	-1.75135
		0.0145695	0.0161104		-1.83656	-1.79289
		0.0145289	0.0142663		-1.83777	-1.84569
		0.014392	0.0164652		-1.84188	-1.78343
		0.0143874	0.0117973		-1.84202	-1.92822
		0.0143824	0.0128007		-1.84217	-1.89277
		0.0143802	0.0121594		-1.84224	-1.91509
		0.0143702	0.015625		-1.84254	-1.80618
		0.014355	0.0128113		-1.843	-1.89241
		0.0143304	0.0134025		-1.84374	-1.87281
		0.0143228	0.0111386		-1.84397	-1.95317
		0.0143126	0.0120607		-1.84428	-1.91863
		0.0143084	0.0130841		-1.84441	-1.88326
		0.0142698	0.0123188		-1.84558	-1.90943
		0.0142543	0.0111423		-1.84605	-1.95303
		0.014244	0.0127652		-1.84637	-1.89397
		0.0141927	0.013055		-1.84793	-1.88422
		0.0141053	0.0160722		-1.85062	-1.79392
		0.0140618	0.0182308		-1.85196	-1.73919
		0.0140537	0.00721455		-1.85221	-2.14179
		0.0140455	0.0133343		-1.85246	-1.87503
		0.0140193	0.0148298		-1.85327	-1.82886
		0.0139991	0.0112978		-1.8539	-1.94701
		0.0139814	0.0160273		-1.85445	-1.79514
		0.0139581	0.0143899		-1.85517	-1.84194
		0.0139211	0.0122247		-1.85633	-1.91276
		0.0138807	0.0147823		-1.85759	-1.83026
		0.0138789	0.0142124		-1.85764	-1.84733
		0.013842	0.0131215		-1.8588	-1.88202
		0.013827	0.0129057		-1.85927	-1.88922
		0.0138265	0.0104603		-1.85929	-1.98046
		0.0138201	0.0145597		-1.85949	-1.83685
		0.0138139	0.0149322		-1.85968	-1.82588
		0.013809	0.0108364		-1.85984	-1.96511
		0.0137637	0.0133552		-1.86126	-1.87435
		0.013754	0.0107735		-1.86157	-1.96764
		0.0137525	0.0119959		-1.86162	-1.92097
		0.0137236	0.00986626		-1.86253	-2.00585
		0.0136877	0.0163468		-1.86367	-1.78657
		0.0136721	0.0120767		-1.86416	-1.91805
		0.0136448	0.0128068		-1.86503	-1.89256
		0.0136376	0.0153153		-1.86526	-1.81487
		0.0136364	0.0103563		-1.8653	-1.9848
		0.0136263	0.00429268		-1.86562	-2.36727
		0.013535	0.0163297		-1.86854	-1.78702
		0.0135341	0.0116139		-1.86857	-1.93502
		0.0135227	0.00949598		-1.86894	-2.02246
		0.0135202	0.0133477		-1.86902	-1.87459
		0.0135187	0.0132125		-1.86907	-1.87901
		0.0135135	0.0121765		-1.86923	-1.91448
		0.0135064	0.0152327		-1.86946	-1.81722
		0.0134805	0.0101814		-1.87029	-1.99219
		0.0134364	0.0138235		-1.87172	-1.85938
		0.0134358	0.0111373		-1.87174	-1.95322
		0.0134172	0.0108873		-1.87234	-1.96308
		0.0134114	0.0127926		-1.87253	-1.89304
		0.0133784	0.0114943		-1.8736	-1.93952
		0.0133025	0.0193816		-1.87607	-1.71261
		0.0132803	0.0118975		-1.87679	-1.92454
		0.0132722	0.0100176		-1.87706	-1.99924
		0.0132574	0.0125585		-1.87754	-1.90106
		0.0132475	0.0133277		-1.87787	-1.87524
		0.0132416	0.0115377		-1.87806	-1.93788
		0.0132321	0.0122802		-1.87837	-1.91079
		0.0132243	0.0135647		-1.87863	-1.86759
		0.0132144	0.0154953		-1.87895	-1.8098
		0.0132003	0.0138137		-1.87942	-1.85969
		0.0131978	0.0108315		-1.8795	-1.96531
		0.0131783	0.0119252		-1.88014	-1.92353
		0.0131687	0.012442		-1.88046	-1.90511
		0.0131608	0.0169846		-1.88072	-1.76994
		0.0131579	0.0102401		-1.88081	-1.9897
		0.0131395	0.0138652		-1.88142	-1.85807
		0.0130803	0.0155726		-1.88338	-1.80764
		0.0130742	0.0122217		-1.88358	-1.91287
		0.0130719	0.0121294		-1.88366	-1.91616
		0.0130661	0.00883764		-1.88385	-2.05366
		0.013065	0.0137401		-1.88389	-1.86201
		0.0130525	0.00804131		-1.88431	-2.09467
		0.0130356	0.0157674		-1.88487	-1.80224
		0.013025	0.0111278		-1.88522	-1.95359
		0.0130204	0.0137067		-1.88538	-1.86307
		0.0130045	0.0116158		-1.88591	-1.93495
		0.0129714	0.0135913		-1.88701	-1.86674
		0.0129427	0.0142673		-1.88798	-1.84566
		0.0129028	0.0118162		-1.88932	-1.92752
		0.0128934	0.0108823		-1.88963	-1.96328
		0.0128743	0.0111232		-1.89028	-1.95377
		0.0128381	0.0116886		-1.8915	-1.93224
		0.0128077	0.0134034		-1.89253	-1.87279
		0.0127974	0.0118783		-1.89288	-1.92525
		0.0127383	0.0143406		-1.89489	-1.84343
		0.0127177	0.0105773		-1.89559	-1.97563
		0.0126939	0.0116129		-1.8964	-1.93506
		0.0126744	0.0116467		-1.89707	-1.9338
		0.012674	0.0110813		-1.89709	-1.95541
		0.0126527	0.0164529		-1.89782	-1.78376
		0.01263	0.00871898		-1.8986	-2.05953
		0.0126227	0.0107154		-1.89885	-1.96999
		0.0126218	0.0182432		-1.89888	-1.7389
		0.0126065	0.011299		-1.89941	-1.94696
		0.0125899	0.00951322		-1.89998	-2.02167
		0.0125716	0.00905753		-1.90061	-2.04299
		0.0125694	0.0127077		-1.90069	-1.89593
		0.0125528	0.0133455		-1.90126	-1.87467
		0.0125313	0.0121245		-1.902	-1.91634
		0.0125166	0.00820429		-1.90251	-2.08596
		0.0125146	0.0097127		-1.90258	-2.01266
		0.0125071	0.0128443		-1.90284	-1.89129
		0.0124881	0.0111141		-1.9035	-1.95413
		0.0124171	0.012945		-1.90598	-1.8879
		0.0124071	0.0135534		-1.90633	-1.86795
		0.0123967	0.0129329		-1.90669	-1.8883
		0.0123865	0.0119144		-1.90705	-1.92393
		0.012359	0.0146986		-1.90802	-1.83272
		0.0123552	0.00867597		-1.90815	-2.06168
		0.012354	0.0100746		-1.90819	-1.99677
		0.0123341	0.0110735		-1.90889	-1.95572
		0.0123318	0.0114063		-1.90897	-1.94286
		0.0123203	0.0126582		-1.90938	-1.89763
		0.0123118	0.0119276		-1.90968	-1.92345
		0.0123072	0.0121575		-1.90984	-1.91516
		0.0122942	0.013263		-1.9103	-1.87736
		0.0122684	0.010577		-1.91121	-1.97564
		0.0122528	0.00594141		-1.91176	-2.22611
		0.0122519	0.00992216		-1.9118	-2.00339
		0.0122479	0.00950258		-1.91194	-2.02216
		0.0122381	0.00830507		-1.91229	-2.08066
		0.0122288	0.010917		-1.91262	-1.9619
		0.0122273	0.0130943		-1.91267	-1.88292
		0.0122068	0.0114943		-1.9134	-1.93952
		0.0122015	0.0143378		-1.91359	-1.84352
		0.0121918	0.00896624		-1.91393	-2.04739
		0.0121886	0.01017		-1.91405	-1.99268
		0.0121553	0.00644419		-1.91523	-2.19083
		0.0121442	0.0208761		-1.91563	-1.68035
		0.012127	0.0191182		-1.91625	-1.71855
		0.0121162	0.0156334		-1.91663	-1.80595
		0.0121107	0.0134519		-1.91683	-1.87122
		0.012105	0.0142873		-1.91704	-1.84505
		0.0120846	0.0184753		-1.91777	-1.73341
		0.0120658	0.011093		-1.91844	-1.95495
		0.012025	0.0114526		-1.91991	-1.9411
		0.0119817	0.0156472		-1.92148	-1.80556
		0.0119752	0.0113138		-1.92172	-1.94639
		0.0119498	0.00983001		-1.92264	-2.00745
		0.0119351	0.0131342		-1.92317	-1.8816
		0.0119289	0.0119874		-1.9234	-1.92128
		0.0119121	0.0120864		-1.92401	-1.9177
		0.0119117	0.00504555		-1.92403	-2.29709
		0.0119078	0.0111278		-1.92417	-1.95359
		0.0118887	0.00966702		-1.92487	-2.01471
		0.0118479	0.0129594		-1.92636	-1.88742
		0.0118449	0.00883362		-1.92647	-2.05386
		0.0118408	0.0102151		-1.92662	-1.99076
		0.0118391	0.0118749		-1.92668	-1.92537
		0.011773	0.0137839		-1.92911	-1.86063
		0.0117548	0.0125163		-1.92978	-1.90252
		0.0117526	0.0136447		-1.92987	-1.86504
		0.0117226	0.00871047		-1.93098	-2.05996
		0.0116777	0.00957337		-1.93264	-2.01894
		0.0116725	0.00899709		-1.93284	-2.0459
		0.011642	0.0145862		-1.93397	-1.83606
		0.011642	0.012018		-1.93397	-1.92017
		0.0116377	0.0125579		-1.93413	-1.90108
		0.011633	0.00888149		-1.93431	-2.05151
		0.0116328	0.00945198		-1.93432	-2.02448
		0.0116279	0.0104639		-1.9345	-1.98031
		0.011576	0.00585069		-1.93644	-2.23279
		0.0115741	0.00917629		-1.93651	-2.03733
		0.0115696	0.014881		-1.93668	-1.82737
		0.0115314	0.0126582		-1.93812	-1.89763
		0.0115251	0.0122823		-1.93836	-1.91072
		0.0115212	0.0130742		-1.9385	-1.88358
		0.0115132	0.0100268		-1.9388	-1.99884
		0.011512	0.0111433		-1.93885	-1.95299
		0.0114954	0.0103011		-1.93948	-1.98712
		0.011475	0.00888996		-1.94025	-2.0511
		0.0114704	0.0120568		-1.94042	-1.91877
		0.0114552	0.0107732		-1.941	-1.96766
		0.0114197	0.0105817		-1.94235	-1.97544
		0.0114096	0.0104848		-1.94273	-1.97944
		0.0113327	0.00936768		-1.94567	-2.02837
		0.0113204	0.0114267		-1.94614	-1.94208
		0.0113036	0.0095327		-1.94678	-2.02078
		0.0112974	0.0111454		-1.94702	-1.9529
		0.0112965	0.0102924		-1.94706	-1.98748
		0.0112868	0.0134174		-1.94743	-1.87233
		0.0112858	0.00945776		-1.94747	-2.02421
		0.0112782	0.0109808		-1.94776	-1.95937
		0.0112729	0.0125224		-1.94796	-1.90231
		0.011249	0.00870211		-1.94889	-2.06038
		0.011235	0.0115391		-1.94943	-1.93783
		0.0112342	0.011122		-1.94946	-1.95382
		0.0112303	0.0105935		-1.94961	-1.97496
		0.0112281	0.0111808		-1.94969	-1.95153
		0.0111986	0.0139033		-1.95084	-1.85688
		0.0111937	0.0117618		-1.95103	-1.92953
		0.0111836	0.00673872		-1.95142	-2.17142
		0.0111685	0.013483		-1.95201	-1.87021
		0.0111397	0.0115554		-1.95313	-1.93722
		0.0111359	0.0126828		-1.95327	-1.89678
		0.0111192	0.00965447		-1.95393	-2.01527
		0.0111053	0.0110003		-1.95447	-1.9586
		0.0111013	0.0139403		-1.95463	-1.85573
		0.011097	0.0122833		-1.95479	-1.91068
		0.011087	0.00795788		-1.95519	-2.0992
		0.0110722	0.0127416		-1.95577	-1.89478
		0.0110674	0.00626679		-1.95595	-2.20295
		0.0110665	0.0090044		-1.95599	-2.04555
		0.0110508	0.00910998		-1.95661	-2.04048
		0.0110356	0.0132437		-1.9572	-1.87799
		0.0110321	0.00650334		-1.95734	-2.18686
		0.0110155	0.0112551		-1.958	-1.94865
		0.0110071	0.0100762		-1.95833	-1.9967
		0.0110059	0.010897		-1.95837	-1.96269
		0.011001	0.0102011		-1.95857	-1.99135
		0.0109917	0.0174944		-1.95894	-1.7571
		0.0109862	0.00908285		-1.95915	-2.04178
		0.0109589	0.0116943		-1.96023	-1.93203
		0.010945	0.00717131		-1.96078	-2.1444
		0.0109263	0.0144885		-1.96153	-1.83898
		0.0109138	0.00808686		-1.96202	-2.09222
		0.0109009	0.0101429		-1.96254	-1.99384
		0.0108949	0.0108512		-1.96278	-1.96452
		0.01089	0.0080962		-1.96297	-2.09172
		0.0108667	0.00929011		-1.9639	-2.03198
		0.0108418	0.0131442		-1.9649	-1.88127
		0.01083	0.0126813		-1.96537	-1.89684
		0.0108256	0.0106566		-1.96555	-1.97238
		0.0108146	0.00842515		-1.96599	-2.07442
		0.0108029	0.00644556		-1.96646	-2.19074
		0.0107965	0.00482686		-1.96672	-2.31634
		0.0107858	0.00453278		-1.96715	-2.34364
		0.0107817	0.0111159		-1.96731	-1.95406
		0.0107761	0.00920278		-1.96754	-2.03608
		0.0107748	0.0131704		-1.96759	-1.8804
		0.0107717	0.00710881		-1.96772	-2.1482
		0.0107674	0.00809873		-1.96789	-2.09158
		0.0107605	0.00897799		-1.96817	-2.04682
		0.0107309	0.0110917		-1.96936	-1.955
		0.0107302	0.0112878		-1.96939	-1.94739
		0.0107296	0.00934579		-1.96942	-2.02938
		0.0107201	0.0117407		-1.9698	-1.93031
		0.0107114	0.00784287		-1.97015	-2.10552
		0.010709	0.0136078		-1.97025	-1.86621
		0.0106743	0.00852126		-1.97166	-2.0695
		0.0106689	0.00655431		-1.97188	-2.18347
		0.0106592	0.0101309		-1.97228	-1.99435
		0.0106493	0.00921563		-1.97268	-2.03547
		0.010647	0.0107161		-1.97277	-1.96996
		0.0106344	0.00920687		-1.97329	-2.03589
		0.0106089	0.010116		-1.97433	-1.99499
		0.0106007	0.0105202		-1.97467	-1.97798
		0.0105734	0.00675236		-1.97579	-2.17054
		0.0105638	0.0125182		-1.97618	-1.90246
		0.0105628	0.00900966		-1.97622	-2.04529
		0.0105604	0.0101565		-1.97632	-1.99326
		0.0105586	0.0120898		-1.97639	-1.91758
		0.0105362	0.0130512		-1.97732	-1.88435
		0.0105272	0.0093282		-1.97769	-2.0302
		0.0105182	0.00937852		-1.97806	-2.02787
		0.0105036	0.00815589		-1.97866	-2.08853
		0.0104938	0.0145905		-1.97907	-1.83593
		0.010484	0.0102207		-1.97947	-1.99052
		0.0104727	0.0110367		-1.97994	-1.95716
		0.0104725	0.0151456		-1.97995	-1.81971
		0.0104686	0.0104486		-1.98011	-1.98094
		0.0104361	0.00935728		-1.98146	-2.02885
		0.010428	0.0115825		-1.9818	-1.9362
		0.0104185	0.0135299		-1.98219	-1.86871
		0.0104148	0.00891753		-1.98235	-2.04976
		0.0104119	0.00508762		-1.98247	-2.29349
		0.0104048	0.0089573		-1.98277	-2.04782
		0.0104032	0.00801625		-1.98283	-2.09603
		0.0104015	0.0132437		-1.9829	-1.87799
		0.0103999	0.0104866		-1.98297	-1.97937
		0.0103821	0.0116168		-1.98371	-1.93491
		0.010377	0.00626841		-1.98393	-2.20284
		0.0103663	0.00863255		-1.98438	-2.06386
		0.0103366	0.0337577		-1.98562	-1.47163
		0.0103345	0.00824787		-1.98571	-2.08366
		0.0103289	0.011859		-1.98595	-1.92595
		0.0103176	0.00812519		-1.98642	-2.09017
		0.0103172	0.0103937		-1.98644	-1.98323
		0.0103093	0.012299		-1.98677	-1.91013
		0.010301	0.0117902		-1.98712	-1.92848
		0.0102918	0.00958508		-1.98751	-2.0184
		0.0102887	0.0145635		-1.98764	-1.83673
		0.0102478	0.00952784		-1.98937	-2.02101
		0.01024	0.0104887		-1.9897	-1.97928
		0.010233	0.0109123		-1.99	-1.96208
		0.0102208	0.00995601		-1.99052	-2.00191
		0.0102203	0.0127769		-1.99054	-1.89357
		0.0102051	0.00922932		-1.99118	-2.03483
		0.0101911	0.00809255		-1.99178	-2.09191
		0.0101847	0.0132395		-1.99205	-1.87813
		0.0101709	0.010543		-1.99264	-1.97704
		0.0101673	0.00890869		-1.99279	-2.05019
		0.0101602	0.00932836		-1.9931	-2.03019
		0.0101595	0.0118492		-1.99313	-1.92631
		0.0101393	0.00860526		-1.99399	-2.06524
		0.0101377	0.0113359		-1.99406	-1.94554
		0.0101333	0.00846694		-1.99425	-2.07227
		0.0101205	0.00894638		-1.9948	-2.04835
		0.0101184	0.00825291		-1.99489	-2.08339
		0.0101177	0.00698463		-1.99492	-2.15586
		0.0101081	0.00844961		-1.99533	-2.07316
		0.0101041	0.0044904		-1.9955	-2.34771
		0.0100961	0.00928577		-1.99585	-2.03218
		0.0100914	0.0101342		-1.99605	-1.99421
		0.0100739	0.0119437		-1.9968	-1.92286
		0.01006	0.0108526		-1.9974	-1.96447
		0.0100543	0.00948221		-1.99765	-2.02309
		0.0100543	0.00951707		-1.99765	-2.0215
		0.0100507	0.0101033		-1.9978	-1.99554
		0.0100421	0.0145968		-1.99818	-1.83574
		0.0100328	0.00920688		-1.99858	-2.03589
		0.0100323	0.00992092		-1.9986	-2.00345
		0.0100211	0.0080271		-1.99908	-2.09544
		0.0100095	0.00391061		-1.99959	-2.40776
		0.00999839	0.00950202		-2.00007	-2.02218
		0.00999071	0.0121138		-2.0004	-1.91672
		0.00997953	0.00939325		-2.00089	-2.02718
		0.00997151	0.00553506		-2.00124	-2.25688
		0.00996943	0.00776374		-2.00133	-2.10993
		0.00995918	0.00599093		-2.00178	-2.22251
		0.00994883	0.00776502		-2.00223	-2.10986
		0.00993571	0.00408922		-2.0028	-2.38836
		0.00991171	0.00791362		-2.00385	-2.10162
		0.00991011	0.00938301		-2.00392	-2.02766
		0.00990826	0.0129526		-2.004	-1.88764
		0.00990049	0.00849858		-2.00434	-2.07065
		0.00989283	0.0121363		-2.00468	-1.91591
		0.00988578	0.0108465		-2.00499	-1.96471
		0.00987829	0.00981048		-2.00532	-2.00831
		0.0098702	0.0111012		-2.00567	-1.95463
		0.00986351	0.00731302		-2.00597	-2.1359
		0.00984867	0.00755829		-2.00662	-2.12158
		0.00984349	0.00865971		-2.00685	-2.0625
		0.00983768	0.010342		-2.00711	-1.9854
		0.00982464	0.00980266		-2.00768	-2.00866
		0.00981932	0.00764866		-2.00792	-2.11641
		0.00981767	0.0107946		-2.00799	-1.96679
		0.00981705	0.013317		-2.00802	-1.87559
		0.00981595	0.00547645		-2.00807	-2.2615
		0.00981474	0.00947243		-2.00812	-2.02354
		0.00980873	0.0112794		-2.00839	-1.94771
		0.00980793	0.00855451		-2.00842	-2.0678
		0.00980139	0.0162019		-2.00871	-1.79043
		0.00980008	0.00995469		-2.00877	-2.00197
		0.00979689	0.0112764		-2.00891	-1.94783
		0.00978127	0.0114424		-2.0096	-1.94148
		0.0097735	0.00864774		-2.00995	-2.0631
		0.00976971	0.00749482		-2.01012	-2.12524
		0.00976469	0.00908106		-2.01034	-2.04186
		0.00975393	0.00992041		-2.01082	-2.00347
		0.00975113	0.0102324		-2.01095	-1.99002
		0.00974494	0.0112989		-2.01122	-1.94696
		0.00973882	0.0103611		-2.01149	-1.98459
		0.0097283	0.00779064		-2.01196	-2.10843
		0.00970968	0.0112574		-2.0128	-1.94856
		0.00968762	0.00986688		-2.01378	-2.00582
		0.00965888	0.0108957		-2.01507	-1.96274
		0.00965701	0.0114211		-2.01516	-1.94229
		0.00965413	0.00986636		-2.01529	-2.00584
		0.00963589	0.0112333		-2.01611	-1.94949
		0.0096351	0.0104385		-2.01614	-1.98136
		0.00962485	0.00766539		-2.01661	-2.11547
		0.00962063	0.00928793		-2.0168	-2.03208
		0.00961595	0.00939762		-2.01701	-2.02698
		0.00959755	0.00823131		-2.01784	-2.08453
		0.00959307	0.00983519		-2.01804	-2.00722
		0.00957435	0.00762754		-2.01889	-2.11762
		0.00957141	0.00929243		-2.01902	-2.03187
		0.00956462	0.00948631		-2.01933	-2.0229
		0.00956429	0.010167		-2.01935	-1.99281
		0.00956378	0.00628544		-2.01937	-2.20166
		0.0095452	0.00627542		-2.02021	-2.20236
		0.00954431	0.0100459		-2.02026	-1.99801
		0.00953576	0.00941776		-2.02064	-2.02605
		0.00953148	0.00834566		-2.02084	-2.07854
		0.00951781	0.00999489		-2.02146	-2.00022
		0.00951049	0.00843882		-2.0218	-2.07372
		0.00949332	0.0118259		-2.02258	-1.92717
		0.00948941	0.00984664		-2.02276	-2.00671
		0.00947542	0.00760853		-2.0234	-2.1187
		0.00947282	0.00947197		-2.02352	-2.02356
		0.00947119	0.0120209		-2.0236	-1.92006
		0.00947112	0.00869012		-2.0236	-2.06097
		0.00946372	0.00924146		-2.02394	-2.03426
		0.00945927	0.00912921		-2.02414	-2.03957
		0.00945738	0.00654041		-2.02423	-2.1844
		0.00943513	0.0118712		-2.02525	-1.92551
		0.00943012	0.0100082		-2.02548	-1.99964
		0.00941556	0.00971086		-2.02615	-2.01274
		0.00941272	0.00786293		-2.02628	-2.10442
		0.00940666	0.00964409		-2.02656	-2.01574
		0.00940513	0.0115111		-2.02664	-1.93888
		0.0094049	0.00963788		-2.02665	-2.01602
		0.00940026	0.00945122		-2.02686	-2.02451
		0.0093947	0.013821		-2.02712	-1.85946
		0.00939387	0.00848761		-2.02716	-2.07121
		0.00939198	0.00964067		-2.02724	-2.01589
		0.00939082	0.010318		-2.0273	-1.9864
		0.00939013	0.0129404		-2.02733	-1.88805
		0.00938338	0.00553663		-2.02764	-2.25675
		0.00937106	0.0106407		-2.02821	-1.97303
		0.00936627	0.0106698		-2.02843	-1.97184
		0.00934136	0.00877039		-2.02959	-2.05698
		0.00933934	0.00960169		-2.02968	-2.01765
		0.00933582	0.00125523		-2.02985	-2.90128
		0.00932973	0.00757445		-2.03013	-2.12065
		0.00930997	0.00411335		-2.03105	-2.3858
		0.00930842	0.00639258		-2.03112	-2.19432
		0.00930734	0.00446429		-2.03117	-2.35025
		0.00930272	0.00747546		-2.03139	-2.12636
		0.00929998	0.00863817		-2.03152	-2.06358
		0.0092885	0.00976934		-2.03205	-2.01013
		0.0092883	0.00244101		-2.03206	-2.61243
		0.00927338	0.00762174		-2.03276	-2.11795
		0.00927288	0.00746115		-2.03279	-2.12719
		0.00926756	0.0118326		-2.03303	-1.92692
		0.00926182	0.00817304		-2.0333	-2.08762
		0.00925518	0.0117425		-2.03362	-1.93024
		0.0092532	0.010574		-2.03371	-1.97576
		0.00924809	0.00991528		-2.03395	-2.0037
		0.00923349	0.00205429		-2.03463	-2.68734
		0.00922064	0.0105426		-2.03524	-1.97705
		0.00921792	0.0079885		-2.03537	-2.09753
		0.00921716	0.00810882		-2.0354	-2.09104
		0.00921659	0.00825015		-2.03543	-2.08354
		0.00919784	0.0100282		-2.03631	-1.99878
		0.00919756	0.00743202		-2.03633	-2.12889
		0.00916724	0.00879426		-2.03776	-2.0558
		0.00909677	0.00908778		-2.04111	-2.04154
		0.00908837	0.00897355		-2.04151	-2.04704
		0.00907763	0.00520749		-2.04203	-2.28337
		0.00906672	0.00731587		-2.04255	-2.13573
		0.00906425	0.00634206		-2.04267	-2.19777
		0.00906183	0.0103678		-2.04278	-1.98431
		0.00906096	0.00705494		-2.04283	-2.15151
		0.00905242	0.00843334		-2.04324	-2.074
		0.00905018	0.00612861		-2.04334	-2.21264
		0.00904289	0.00949338		-2.04369	-2.02258
		0.0090421	0.00775776		-2.04373	-2.11026
		0.00902595	0.0100733		-2.04451	-1.99683
		0.00902235	0.00347924		-2.04468	-2.45852
		0.00900069	0.0087808		-2.04572	-2.05647
		0.00898876	0.00561427		-2.0463	-2.25071
		0.00898494	0.00600426		-2.04648	-2.22154
		0.00898473	0.00678751		-2.04649	-2.16829
		0.00898092	0.00734123		-2.04668	-2.13423
		0.0089725	0.00921836		-2.04709	-2.03535
		0.00896538	0.0111199		-2.04743	-1.9539
		0.00896164	0.0105193		-2.04761	-1.97801
		0.00895208	0.00890603		-2.04808	-2.05032
		0.00894188	0.00714916		-2.04857	-2.14574
		0.00892991	0.00815846		-2.04915	-2.08839
		0.00892091	0.00945946		-2.04959	-2.02413
		0.00891733	0.0201894		-2.04977	-1.69488
		0.00890366	0.00682746		-2.05043	-2.16574
		0.00890182	0.00974109		-2.05052	-2.01139
		0.00889274	0.00532725		-2.05096	-2.2735
		0.00889147	0.00832743		-2.05103	-2.07949
		0.00889006	0.00755887		-2.0511	-2.12154
		0.0088717	0.00861839		-2.05199	-2.06457
		0.00886993	0.00668765		-2.05208	-2.17473
		0.00886934	0.00830005		-2.05211	-2.08092
		0.00886715	0.0110667		-2.05222	-1.95598
		0.00885913	0.00854057		-2.05261	-2.06851
		0.00885899	0.00792422		-2.05262	-2.10104
		0.0088576	0.00772834		-2.05268	-2.11191
		0.00884207	0.00845421		-2.05345	-2.07293
		0.00883838	0.0105905		-2.05363	-1.97508
		0.00883552	0.00898285		-2.05377	-2.04659
		0.00883534	0.00919319		-2.05378	-2.03653
		0.00883414	0.00836678		-2.05384	-2.07744
		0.00882569	0.00814415		-2.05425	-2.08915
		0.008816	0.00874657		-2.05473	-2.05816
		0.00880503	0.00963035		-2.05527	-2.01636
		0.00879765	0.0108092		-2.05563	-1.96621
		0.00879598	0.0105914		-2.05572	-1.97505
		0.00878421	0.0102474		-2.0563	-1.98939
		0.0087825	0.00871755		-2.05638	-2.05961
		0.00876985	0.0102699		-2.05701	-1.98843
		0.00876732	0.00807777		-2.05713	-2.09271
		0.00875888	0.00711974		-2.05755	-2.14754
		0.00874224	0.0118902		-2.05838	-1.92481
		0.00872342	0.00768547		-2.05931	-2.11433
		0.00871709	0.00669168		-2.05963	-2.17446
		0.00871623	0.00779051		-2.05967	-2.10843
		0.00871348	0.00967171		-2.05981	-2.0145
		0.00871325	0.00998789		-2.05982	-2.00053
		0.0086973	0.00893837		-2.06062	-2.04874
		0.00869274	0.00773908		-2.06084	-2.11131
		0.00868916	0.0082226		-2.06102	-2.08499
		0.00867418	0.0110024		-2.06177	-1.95851
		0.00865846	0.00600474		-2.06256	-2.22151
		0.00864033	0.00753047		-2.06347	-2.12318
		0.00864029	0.00964967		-2.06347	-2.01549
		0.00863538	0.00905483		-2.06372	-2.04312
		0.0086336	0.00867277		-2.06381	-2.06184
		0.00861688	0.0105137		-2.06465	-1.97824
		0.00860005	0.00693789		-2.0655	-2.15877
		0.00859361	0.00876198		-2.06582	-2.0574
		0.00859192	0.00836467		-2.06591	-2.07755
		0.00859141	0.0078332		-2.06594	-2.10606
		0.00855075	0.00957537		-2.068	-2.01884
		0.00855012	0.0110176		-2.06803	-1.95791
		0.00854249	0.00741054		-2.06842	-2.13015
		0.0085416	0.00785032		-2.06846	-2.10511
		0.00853936	0.00778238		-2.06857	-2.10889
		0.00853543	0.0116314		-2.06877	-1.93437
		0.0085282	0.00918524		-2.06914	-2.03691
		0.00852171	0.0101354		-2.06947	-1.99416
		0.00851908	0.00923137		-2.06961	-2.03473
		0.00851751	0.00964732		-2.06969	-2.01559
		0.00851064	0.00964098		-2.07004	-2.01588
		0.00850625	0.010168		-2.07026	-1.99276
		0.00850504	0.00708493		-2.07032	-2.14966
		0.00850425	0.00607533		-2.07036	-2.21643
		0.00849356	0.00620256		-2.07091	-2.20743
		0.00848049	0.00753255		-2.07158	-2.12306
		0.00847458	0.00802752		-2.07188	-2.09542
		0.00846831	0.00856179		-2.0722	-2.06744
		0.00845981	0.00668648		-2.07264	-2.1748
		0.00845219	0.00820536		-2.07303	-2.0859
		0.00844546	0.00811742		-2.07338	-2.09058
		0.00843272	0.00836941		-2.07403	-2.07731
		0.00843157	0.0081141		-2.07409	-2.09076
		0.00842713	0.00697061		-2.07432	-2.15673
		0.00842318	0.00713514		-2.07452	-2.1466
		0.00842283	0.0108052		-2.07454	-1.96637
		0.00841944	0.00656455		-2.07472	-2.1828
		0.00841908	0.0100215		-2.07474	-1.99907
		0.00841803	0.0076118		-2.07479	-2.11851
		0.00841326	0.00969718		-2.07504	-2.01335
		0.00841253	0.00975682		-2.07507	-2.01069
		0.00839866	0.0071447		-2.07579	-2.14602
		0.00839779	0.00617807		-2.07583	-2.20915
		0.0083941	0.00909753		-2.07603	-2.04108
		0.00838373	0.00916306		-2.07656	-2.03796
		0.00837847	0.00917431		-2.07684	-2.03743
		0.00837782	0.0066895		-2.07687	-2.17461
		0.0083669	0.004556		-2.07744	-2.34142
		0.00836564	0.00824553		-2.0775	-2.08378
		0.00835558	0.00751217		-2.07802	-2.12423
		0.00835267	0.00763501		-2.07817	-2.11719
		0.00834384	0.00627098		-2.07863	-2.20266
		0.00834349	0.0107704		-2.07865	-1.96777
		0.00834161	0.00848922		-2.07875	-2.07113
		0.00832603	0.00569177		-2.07956	-2.24475
		0.00831113	0.00951374		-2.08034	-2.02165
		0.00830786	0.00380342		-2.08051	-2.41983
		0.0083021	0.00996405		-2.08081	-2.00156
		0.00829876	0.00847726		-2.08099	-2.07174
		0.00829475	0.00800769		-2.0812	-2.09649
		0.00829315	0.00560486		-2.08128	-2.25144
		0.00829268	0.00726141		-2.08131	-2.13898
		0.00828655	0.00768137		-2.08163	-2.11456
		0.00827544	0.00719424		-2.08221	-2.14302
		0.00825911	0.0110208		-2.08307	-1.95779
		0.00824858	0.00563434		-2.08362	-2.24916
		0.00823757	0.00786487		-2.0842	-2.10431
		0.00823224	0.00891605		-2.08448	-2.04983
		0.00823079	0.010927		-2.08456	-1.9615
		0.00822855	0.00782406		-2.08468	-2.10657
		0.00822584	0.0113837		-2.08482	-1.94372
		0.0082213	0.0105856		-2.08506	-1.97528
		0.00821253	0.00823579		-2.08552	-2.08429
		0.00820989	0.00477992		-2.08566	-2.32058
		0.0082004	0.00669619		-2.08616	-2.17417
		0.0081884	0.00412567		-2.0868	-2.38451
		0.00818804	0.00545319		-2.08682	-2.26335
		0.0081834	0.00710978		-2.08707	-2.14814
		0.00816915	0.00721834		-2.08782	-2.14156
		0.00816447	0.00588646		-2.08807	-2.23015
		0.00816422	0.00693173		-2.08809	-2.15916
		0.00816206	0.00677083		-2.0882	-2.16936
		0.00816135	0.0054326		-2.08824	-2.26499
		0.00814159	0.00669106		-2.08929	-2.17451
		0.00813905	0.0104836		-2.08943	-1.97949
		0.00813628	0.00603041		-2.08957	-2.21965
		0.00813393	0.00592392		-2.0897	-2.22739
		0.00813147	0.00766348		-2.08983	-2.11557
		0.00812929	0.0076828		-2.08995	-2.11448
		0.00812808	0.00733616		-2.09001	-2.13453
		0.00812261	0.00817493		-2.0903	-2.08752
		0.00811636	0.00896316		-2.09064	-2.04754
		0.00810489	0.00593261		-2.09125	-2.22675
		0.00810112	0.00617951		-2.09145	-2.20905
		0.00808147	0.00689583		-2.09251	-2.16141
		0.00807605	0.00738299		-2.0928	-2.13177
		0.00806741	0.0071965		-2.09327	-2.14288
		0.00806293	0.00990099		-2.09351	-2.00432
		0.00806173	0.00945418		-2.09357	-2.02438
		0.00805818	0.00407042		-2.09376	-2.39036
		0.00805493	0.00478596		-2.09394	-2.32003
		0.00805126	0.0102826		-2.09414	-1.9879
		0.00805085	0.0085129		-2.09416	-2.06992
		0.00804795	0.00938434		-2.09431	-2.0276
		0.00804563	0.00610594		-2.09444	-2.21425
		0.00804053	0.00693853		-2.09472	-2.15873
		0.00803674	0.00690618		-2.09492	-2.16076
		0.00803428	0.00366492		-2.09505	-2.43594
		0.00800801	0.011713		-2.09648	-1.93133
		0.00800705	0.0063699		-2.09653	-2.19587
		0.00799624	0.00894287		-2.09711	-2.04852
		0.0079918	0.00078911		-2.09736	-3.10286
		0.00799017	0.00604792		-2.09744	-2.21839
		0.00798991	0.00835089		-2.09746	-2.07827
		0.00798599	0.00738034		-2.09767	-2.13192
		0.00798249	0.0110656		-2.09786	-1.95603
		0.00797872	0.00546482		-2.09807	-2.26242
		0.00796757	0.00628045		-2.09867	-2.20201
		0.00794025	0.00729873		-2.10017	-2.13675
		0.00793758	0.00316999		-2.10031	-2.49894
		0.00792952	0.00936482		-2.10075	-2.0285
		0.00792723	0.00675261		-2.10088	-2.17053
		0.00792015	0.00654431		-2.10127	-2.18414
		0.00791265	0.00606186		-2.10168	-2.21739
		0.00790653	0.00681644		-2.10201	-2.16644
		0.00789781	0.00575084		-2.10249	-2.24027
		0.0078957	0.00438084		-2.10261	-2.35844
		0.00787531	0.00462118		-2.10373	-2.33525
		0.00787045	0.00579509		-2.104	-2.23694
		0.00786708	0.00506194		-2.10419	-2.29568
		0.0078614	0.00817793		-2.1045	-2.08736
		0.00785378	0.00755355		-2.10492	-2.12185
		0.00784057	0.00204447		-2.10565	-2.68942
		0.00783699	0.00528479		-2.10585	-2.27697
		0.00782099	0.00413403		-2.10674	-2.38363
		0.00782083	0.00637394		-2.10675	-2.19559
		0.00781114	0.00665623		-2.10729	-2.17677
		0.00781047	0.00745742		-2.10732	-2.12741
		0.00778118	0.00594813		-2.10895	-2.22562
		0.00777737	0.0077332		-2.10917	-2.11164
		0.00776427	0.00595807		-2.1099	-2.22489
		0.00775988	0.00801833		-2.11014	-2.09592
		0.00775539	0.00771031		-2.1104	-2.11293
		0.00775307	0.00620601		-2.11053	-2.20719
		0.00775265	0.00928028		-2.11055	-2.03244
		0.00774585	0.00758725		-2.11093	-2.11992
		0.00772161	0.0070341		-2.11229	-2.15279
		0.00770331	0.00636267		-2.11332	-2.19636
		0.00770308	0.0073065		-2.11334	-2.13629
		0.00770026	0.00744834		-2.11349	-2.12794
		0.00769958	0.00966811		-2.11353	-2.01466
		0.00769298	0.00866812		-2.11391	-2.06208
		0.00769231	0.00543933		-2.11394	-2.26445
		0.00767263	0.00838705		-2.11506	-2.07639
		0.00766096	0.00727052		-2.11572	-2.13843
		0.00766044	0.00528549		-2.11575	-2.27691
		0.00765917	0.0100866		-2.11582	-1.99626
		0.0076576	0.0101139		-2.11591	-1.99508
		0.00765404	0.00623053		-2.11611	-2.20548
		0.0076484	0.00649919		-2.11643	-2.18714
		0.00764807	0.0100593		-2.11645	-1.99743
		0.00764661	0.00238245		-2.11653	-2.62298
		0.00764088	0.00749741		-2.11686	-2.12509
		0.0076363	0.0158614		-2.11712	-1.79966
		0.00763419	0.00879362		-2.11724	-2.05583
		0.00763359	0.00812074		-2.11727	-2.0904
		0.0076316	0.00610134		-2.11738	-2.21457
		0.00762595	0.00734786		-2.11771	-2.13384
		0.00762494	0.00971975		-2.11776	-2.01234
		0.00761871	0.00702822		-2.11812	-2.15315
		0.00760876	0.00888372		-2.11869	-2.05141
		0.00760857	0.00732919		-2.1187	-2.13494
		0.00759768	0.00779114		-2.11932	-2.1084
		0.00759723	0.0090734		-2.11934	-2.04223
		0.00758098	0.00949345		-2.12027	-2.02258
		0.00757802	0.00707358		-2.12044	-2.15036
		0.00757462	0.00736961		-2.12064	-2.13256
		0.00757402	0.00760713		-2.12067	-2.11878
		0.00757382	0.00556408		-2.12069	-2.25461
		0.00756648	0.00449396		-2.12111	-2.34737
		0.00756612	0.0050944		-2.12113	-2.29291
		0.00756518	0.00511338		-2.12118	-2.29129
		0.00755721	0.00465707		-2.12164	-2.33189
		0.00755549	0.00812568		-2.12174	-2.09014
		0.0075541	0.00633321		-2.12182	-2.19838
		0.00755316	0.00536004		-2.12187	-2.27083
		0.00754848	0.00467336		-2.12214	-2.33037
		0.00754575	0.00346154		-2.1223	-2.46073
		0.00754276	0.0096875		-2.12247	-2.01379
		0.00753191	0.00529552		-2.12309	-2.27609
		0.00752611	0.00654285		-2.12343	-2.18423
		0.00752445	0.0100737		-2.12353	-1.99681
		0.00750824	0.00833192		-2.12446	-2.07925
		0.00750799	0.010055		-2.12448	-1.99762
		0.00749856	0.00628931		-2.12502	-2.2014
		0.0074939	0.000523013		-2.12529	-3.28149
		0.00748958	0.00541126		-2.12554	-2.2667
		0.00748503	0.00682594		-2.12581	-2.16584
		0.00748156	0.00659463		-2.12601	-2.18081
		0.00748079	0.00571705		-2.12605	-2.24283
		0.00747025	0.00819759		-2.12666	-2.08631
		0.00747005	0.00334728		-2.12668	-2.47531
		0.00746114	0.00736206		-2.12719	-2.133
		0.00745981	0.00941313		-2.12727	-2.02627
		0.00745686	0.00976615		-2.12744	-2.01028
		0.00745371	0.00691598		-2.12763	-2.16015
		0.00744961	0.00856611		-2.12787	-2.06722
		0.00744177	0.0061917		-2.12832	-2.20819
		0.0074369	0.00824905		-2.12861	-2.0836
		0.00743083	0.00605408		-2.12896	-2.21795
		0.00742555	0.00752249		-2.12927	-2.12364
		0.00742327	0.00626804		-2.1294	-2.20287
		0.00742282	0.00938801		-2.12943	-2.02743
		0.00740477	0.00804844		-2.13049	-2.09429
		0.00740403	0.00738851		-2.13053	-2.13144
		0.00740273	0.00795679		-2.13061	-2.09926
		0.00740092	0.00625566		-2.13071	-2.20373
		0.00740076	0.0052108		-2.13072	-2.2831
		0.00738985	0.0093723		-2.13136	-2.02815
		0.00738916	0.00720305		-2.1314	-2.14248
		0.00738656	0.00768629		-2.13156	-2.11428
		0.00738462	0.00710804		-2.13167	-2.14825
		0.00737644	0.00641907		-2.13215	-2.19253
		0.0073764	0.00479206		-2.13216	-2.31948
		0.00735938	0.00703132		-2.13316	-2.15296
		0.0073575	0.00513614		-2.13327	-2.28936
		0.00735428	0.0089409		-2.13346	-2.04862
		0.00734864	0.00807108		-2.13379	-2.09307
		0.00734831	0.00724556		-2.13381	-2.13993
		0.00734761	0.00641026		-2.13385	-2.19312
		0.00733682	0.00693545		-2.13449	-2.15893
		0.00733574	0.00309278		-2.13456	-2.50965
		0.00733254	0.00506567		-2.13475	-2.29536
		0.00733138	0.0052565		-2.13481	-2.2793
		0.007328	0.0027582		-2.13501	-2.55937
		0.00732753	0.00516732		-2.13504	-2.28673
		0.00731846	0.00830641		-2.13558	-2.08059
		0.00731355	0.00874857		-2.13587	-2.05806
		0.00731308	0.00387415		-2.1359	-2.41182
		0.00730994	0.00525279		-2.13609	-2.27961
		0.00730953	0.00454362		-2.13611	-2.3426
		0.00730469	0.00732127		-2.1364	-2.13541
		0.00729685	0.0104932		-2.13686	-1.97909
		0.00728929	0.00772421		-2.13731	-2.11215
		0.0072863	0.00867824		-2.13749	-2.06157
		0.00728528	0.010591		-2.13755	-1.97506
		0.00728014	0.0071066		-2.13786	-2.14834
		0.00727959	0.00612432		-2.13789	-2.21294
		0.00727946	0.0103528		-2.1379	-1.98494
		0.0072748	0.00702269		-2.13818	-2.1535
		0.00727273	0.00750053		-2.1383	-2.12491
		0.00726073	0.00587455		-2.13902	-2.23103
		0.00724909	0.00442227		-2.13972	-2.35435
		0.00723861	0.00629591		-2.14034	-2.20094
		0.00723618	0.0056902		-2.14049	-2.24487
		0.00723428	0.00925926		-2.1406	-2.03342
		0.00722956	0.0107627		-2.14089	-1.96808
		0.00722767	0.0082688		-2.141	-2.08256
		0.00722163	0.00489929		-2.14136	-2.30987
		0.00722022	0.00791487		-2.14145	-2.10156
		0.00721641	0.00792238		-2.14168	-2.10114
		0.00721071	0.00856611		-2.14202	-2.06722
		0.00720758	0.00651654		-2.14221	-2.18598
		0.00720288	0.0177472		-2.14249	-1.75087
		0.00720174	0.0064837		-2.14256	-2.18818
		0.00720172	0.00678696		-2.14256	-2.16832
[truncated: 33,879 more rows]
