# Supplementary material for: A large effective population size for established within-host influenza virus infection
Source: eLife. 2020 Aug 10;9:e56915. doi: 10.7554/eLife.56915 (PMC7431133; doi:10.7554/eLife.56915)
Supplement: Figure 2—figure supplement 7—source data 1. [file elife-56915-fig2-figsupp7-data1.xlsx]

## Sheet: Sheet1
		Frequency range lower	Frequency range upper	Proportion of true positive variants
		0.02	0.5	0.999175
		0.015	0.02	0.990431
		0.01	0.015	0.98364
		0.008	0.01	0.977723
		0.006	0.008	0.931298
		0.004	0.006	0.891073
		0.002	0.004	0.837442
		0.001	0.002	0.804382
		0.0005	0.001	0.302934
		0.0001	0.0005	0.200889
		0	0.0001	0
