# Supplementary material for: A large effective population size for established within-host influenza virus infection
Source: eLife. 2020 Aug 10;9:e56915. doi: 10.7554/eLife.56915 (PMC7431133; doi:10.7554/eLife.56915)
Supplement: Figure 2—source data 1. — (A) Sequence distances D calculated for pairwise samples from the population used in the calculation for clade A. Data points are ordered by the difference in sample times, measured in whole days between samples. (B) Distance statistics calculated from simulated data for different effective population sizes Ne. (C) Sequence distances D calculated for pairwise samples from the population used in the calculation for clade B. (D) Distance statistics calculated from simulated data for different effective population sizes Ne. [file elife-56915-fig2-data1.xlsx]

## Sheet: Figure A
	Time Difference (days)	Sequence Difference (nucleotides)
	1	43.2879
	2	39.9945
	2	33.1352
	3	44.549
	3	45.3038
	3	34.8888
	3	35.5462
	3	34.1193
	3	49.5052
	3	47.2453
	3	50.5312
	3	55.4871
	3	49.5665
	4	38.6061
	4	47.0123
	4	35.2761
	4	27.6975
	4	29.6576
	4	38.4833
	4	44.5205
	4	43.1492
	4	54.5702
	4	57.1128
	4	54.29
	5	35.0961
	5	42.5376
	6	41.2866
	6	30.7772
	6	50.6101
	6	45.1715
	6	48.7854
	7	33.6364
	7	45.2618
	7	34.2612
	7	34.3566
	7	29.4766
	7	37.1774
	7	33.8114
	7	41.573
	7	50.5452
	7	51.5393
	7	51.7516
	7	53.4375
	7	44.6299
	7	60.8138
	7	49.4711
	8	43.2449
	8	47.8796
	8	31.8992
	8	41.379
	8	39.9096
	8	46.9949
	9	43.4241
	9	47.0445
	9	44.7633
	10	37.2401
	10	31.7424
	10	37.7167
	10	34.0467
	10	24.693
	10	39.3236
	10	53.1162
	10	53.7537
	10	58.9954
	11	39.1921
	11	34.4931
	11	42.78
	11	34.3673
	11	46.3761
	11	45.1428
	11	52.6219
	11	44.4357
	11	44.8882
	11	56.2583
	12	38.6772
	12	47.8509
	12	41.9285
	13	44.9646
	13	25.9316
	13	33.9643
	13	54.5427
	14	39.3501
	14	32.7695
	14	32.2922
	14	31.654
	14	26.9657
	14	35.1114
	14	34.7017
	14	41.6049
	14	40.7841
	14	41.0659
	14	35.4905
	14	44.4186
	14	54.6579
	14	51.7761
	14	49.4703
	14	55.3536
	14	51.0772
	15	31.9677
	15	38.4308
	15	42.8387
	16	39.4239
	17	36.0426
	17	36.1467
	17	41.0648
	17	35.7323
	17	31.5434
	17	37.4301
	17	43.7798
	17	55.6772
	18	36.6493
	18	38.3285
	18	27.3364
	18	46.6653
	18	46.0067
	18	46.7107
	18	49.121
	18	49.7348
	18	33.7104
	18	54.1615
	19	41.1312
	19	50.0385
	20	41.6328
	20	42.0576
	20	36.271
	20	31.687
	20	48.6159
	20	48.9102
	20	55.4378
	21	23.9114
	21	40.2261
	21	44.1538
	21	28.5581
	21	32.53
	21	37.8843
	21	34.2074
	21	41.1143
	21	41.3676
	21	49.8505
	21	54.0477
	21	53.4306
	21	50.0926
	22	45.8075
	22	35.69
	22	47.0755
	22	39.8793
	22	54.5156
	23	36.4514
	23	39.1372
	23	42.158
	23	46.4894
	24	34.4117
	24	34.4286
	24	31.6691
	24	30.7983
	24	30.7157
	24	49.1617
	24	41.2133
	24	49.6685
	24	52.8826
	25	29.3364
	25	39.5534
	25	40.6548
	25	39.2786
	25	54.1955
	25	54.3658
	26	35.5108
	26	42.7081
	26	57.5409
	27	39.3488
	27	47.1092
	27	58.6693
	28	32.6885
	28	39.8344
	28	31.5582
	28	26.3504
	28	33.5068
	28	33.1975
	28	31.2367
	28	41.1493
	28	46.0522
	28	44.6735
	28	42.971
	28	48.6138
	28	52.451
	28	52.6074
	28	44.8404
	29	33.9326
	29	44.4805
	29	50.481
	30	35.6557
	30	34.1241
	30	31.8533
	30	46.3513
	31	43.0316
	31	33.6964
	31	26.9125
	31	55.2289
	31	53.0845
	31	53.9881
	31	55.4054
	32	39.2828
	32	42.8622
	32	39.7143
	32	49.0234
	32	48.6346
	32	46.1627
	32	46.8729
	32	52.3438
	33	43.0338
	33	41.0303
	33	56.4714
	34	31.8702
	34	42.08
	34	52.2893
	34	47.835
	35	32.9678
	35	35.9607
	35	34.3114
	35	40.8956
	35	41.4535
	35	49.0308
	35	45.4983
	35	38.7783
	35	51.7307
	35	55.0794
	35	49.5996
	36	43.1202
	36	45.6598
	36	50.2911
	36	47.0409
	36	45.2002
	37	42.6159
	37	47.1426
	38	38.653
	38	36.9164
	38	32.4301
	38	29.0646
	38	38.4258
	38	54.2853
	38	52.7071
	39	30.5459
	39	40.5666
	39	46.9164
	39	43.3519
	39	43.9253
	39	42.7887
	39	51.2605
	39	44.9233
	40	32.3548
	40	50.5292
	40	53.4528
	41	41.5405
	41	29.4343
	41	37.8181
	42	38.2855
	42	44.673
	42	30.9038
	42	38.4449
	42	35.4659
	42	40.0692
	42	42.1487
	42	49.211
	42	43.0596
	42	55.6498
	42	53.1274
	42	44.8116
	42	52.4572
	43	34.7331
	43	45.9302
	43	51.4687
	43	46.9026
	44	33.5272
	44	36.766
	45	34.961
	45	34.78
	45	38.2988
	45	51.2398
	45	57.7581
	45	42.0582
	46	48.7923
	46	42.2323
	46	37.997
	46	42.4277
	46	43.9488
	47	49.9794
	47	44.7977
	47	39.8547
	48	41.1352
	48	37.8493
	48	51.5322
	49	31.2515
	49	45.7282
	49	36.3965
	49	42.2591
	49	42.0991
	49	46.4512
	49	40.706
	49	54.8365
	49	51.741
	49	53.419
	50	48.6394
	50	49.9681
	50	48.6916
	50	55.7674
	51	42.3097
	51	37.3204
	51	51.7123
	52	39.2017
	52	39.3261
	52	34.5388
	52	39.6659
	52	42.3887
	52	55.4099
	53	47.6696
	53	30.8019
	53	42.7778
	53	49.2952
	53	49.6204
	53	49.5989
	53	44.8768
	53	39.0262
	53	51.5214
	54	39.7304
	54	43.5643
	54	33.8241
	54	43.924
	55	52.3513
	55	55.8319
	56	45.987
	56	35.3504
	56	37.4287
	56	33.9759
	56	37.853
	56	40.9546
	56	42.1688
	56	41.9115
	56	49.3083
	56	50.9365
	56	47.3039
	57	46.1361
	57	57.1986
	58	38.9123
	58	40.4247
	58	50.5753
	59	45.6585
	59	43.6226
	59	45.8627
	59	35.8198
	59	41.6108
	59	49.9935
	60	35.1967
	60	48.4696
	60	47.9659
	60	42.875
	60	42.1463
	60	43.0318
	61	42.1718
	61	52.3524
	61	47.2216
	62	49.1019
	62	45.8321
	62	30.1619
	62	40.7999
	62	49.5029
	62	57.0881
	63	33.2822
	63	43.4762
	63	43.8876
	63	38.9093
	63	46.8231
	63	54.3686
	63	50.4821
	63	45.176
	64	47.2641
	64	45.2227
	65	48.0803
	65	38.9226
	65	54.4526
	66	35.6328
	66	41.854
	66	34.6838
	66	42.4132
	66	43.395
	66	52.6956
	67	38.7901
	67	45.3568
	67	39.4354
	67	42.2465
	67	44.1832
	67	35.5726
	68	33.6189
	69	40.4615
	69	46.8255
	69	60.6954
	70	44.588
	70	42.7977
	70	45.4847
	70	48.7623
	70	39.8715
	70	42.6085
	70	44.0503
	70	53.3108
	70	56.0502
	71	42.9035
	71	45.1512
	71	41.3707
	72	58.789
	73	39.9045
	73	46.9965
	73	47.5929
	73	44.3123
	73	42.7528
	73	57.0372
	74	45.8487
	74	45.8262
	74	46.2259
	74	43.8047
	74	40.7531
	74	50.1663
	75	44.7354
	75	45.8677
	75	46.7606
	76	39.834
	76	50.5778
	77	35.8209
	77	39.0649
	77	42.6071
	77	48.3652
	77	41.1129
	77	41.0473
	77	45.2647
	77	53.2693
	78	45.2347
	79	43.0289
	79	46.3473
	80	46.2433
	80	43.2753
	80	51.7005
	81	37.4669
	81	40.3215
	81	49.3046
	81	47.0283
	81	45.6463
	81	48.9529
	81	46.9126
	82	43.95
	82	41.7059
	83	40.6206
	83	48.2525
	84	50.0346
	84	45.0323
	84	45.6061
	84	36.2807
	84	42.8531
	84	49.2516
	84	49.5304
	84	38.0133
	86	46.8219
	87	43.9137
	87	46.849
	87	45.7874
	87	51.2074
	87	49.9316
	88	41.7516
	88	50.1162
	88	37.3986
	88	41.2936
	88	41.3099
	88	45.5179
	89	46.1777
	90	53.1567
	90	43.0968
	90	50.326
	91	41.0489
	91	48.4224
	91	45.5327
	91	44.5886
	91	52.0722
	91	51.0608
	91	43.6743
	92	48.6705
	93	44.3266
	93	42.7902
	94	49.2692
	94	47.1852
	94	43.6422
	94	52.4541
	95	50.0397
	95	41.6226
	95	41.5454
	95	41.7968
	95	45.5238
	95	53.5454
	96	47.2229
	96	46.9387
	97	48.7409
	98	39.4282
	98	49.0784
	98	47.4042
	98	49.7582
	98	40.5149
	98	54.8374
	98	52.7292
	99	45.1114
	101	45.4175
	101	47.2285
	101	43.01
	101	41.1428
	101	53.1917
	101	52.1918
	102	41.1153
	102	40.2271
	102	49.4853
	103	44.284
	104	49.8342
	104	53.5202
	105	38.8972
	105	48.8826
	105	48.8898
	105	48.8191
	105	44.6141
	105	50.3852
	105	46.4159
	105	44.0446
	107	47.8089
	108	54.1206
	108	53.0469
	108	41.5811
	108	54.1406
	109	39.9831
	109	47.9541
	109	45.9273
	109	44.8721
	110	47.1448
	111	51.3642
	111	54.8546
	112	46.9266
	112	46.4276
	112	51.9232
	112	42.9543
	112	45.6815
	113	44.0617
	114	45.7552
	114	53.6132
	115	54.3271
	115	54.6352
	115	49.9063
	116	42.2832
	116	49.7371
	116	44.1098
	117	43.801
	117	45.5078
	118	45.2444
	119	51.1894
	119	48.1136
	119	53.4972
	119	43.9112
	119	44.4379
	121	48.4437
	121	54.8435
	122	60.5668
	123	41.8438
	123	52.4489
	123	41.9558
	124	51.7596
	124	43.5848
	125	48.6618
	126	51.7539
	126	55.7919
	126	46.1226
	127	45.424
	128	46.0097
	128	59.0406
	129	43.999
	130	48.2721
	131	51.9508
	131	39.1803
	132	55.5855
	133	48.0473
	134	47.7128
	135	45.4645
	137	45.3437
	137	43.2348
	140	47.9721
	141	49.6562
	144	42.6426
	145	44.3569
	146	47.9158
	148	48.7606
	149	47.5721
	152	41.3612
	154	49.3751
	157	48.4178

## Sheet: Figure B
	Effective N	Mean Distance	Lower Bound	Upper Bound
	100000	0.349281	0.28537	0.44346		Sequence Data
	200000	0.239819	0.197085	0.289165		Estimated Rate per Generation	0.0210723
	300000	0.206075	0.16881	0.26373		Lower Bound	0.0141474
	400000	0.180455	0.150953	0.223553		Upper Bound	0.0279973
	500000	0.151459	0.128992	0.180476
	600000	0.142579	0.119455	0.172027
	800000	0.128373	0.101584	0.161643
	1000000	0.106372	0.088094	0.132575
	2000000	0.0760977	0.065661	0.08776
	4000000	0.054541	0.0451807	0.06581
	5000000	0.0490731	0.0409686	0.0605804
	6000000	0.046924	0.0373545	0.0642045
	8000000	0.0385704	0.0323949	0.0475934
	10000000	0.0355163	0.0292605	0.0448917
	15000000	0.0277208	0.0231181	0.032961
	20000000	0.0239672	0.0197969	0.0295448
	25000000	0.0215731	0.0176864	0.026146
	30000000	0.0196258	0.0159766	0.0232078
	35000000	0.0181733	0.0150315	0.0217403
	40000000	0.0169696	0.0138402	0.0206053
	50000000	0.0151915	0.0124981	0.0181491
	60000000	0.0138616	0.0115499	0.0164371
	70000000	0.0128405	0.0104199	0.0156924
	80000000	0.0120284	0.00963148	0.0145469
	90000000	0.0113011	0.00922292	0.0134521
	100000000	0.0107215	0.0088655	0.0127913
	120000000	0.00979405	0.00798523	0.0118168
	150000000	0.0087449	0.00704692	0.0103004
	200000000	0.00759402	0.00617471	0.00896649

## Sheet: Figure C
	Time Difference (days)	Sequence Difference (nucleotides)
	5	34.6167
	67	71.827
	174	73.1825
	179	72.1563
	241	95.0545
	246	85.9532

## Sheet: Figure D
	Effective N	Mean Distance	Lower Bound	Upper Bound
	100000	0.349281	0.28537	0.44346		Sequence Data
	200000	0.239819	0.197085	0.289165		Estimated Rate per Generation	0.0792644
	300000	0.206075	0.16881	0.26373		Lower Bound	0.009363
	400000	0.180455	0.150953	0.223553		Upper Bound	0.149166
	500000	0.151459	0.128992	0.180476
	600000	0.142579	0.119455	0.172027
	800000	0.128373	0.101584	0.161643
	1000000	0.106372	0.088094	0.132575
	2000000	0.0760977	0.065661	0.08776
	4000000	0.054541	0.0451807	0.06581
	5000000	0.0490731	0.0409686	0.0605804
	6000000	0.046924	0.0373545	0.0642045
	8000000	0.0385704	0.0323949	0.0475934
	10000000	0.0355163	0.0292605	0.0448917
	15000000	0.0277208	0.0231181	0.032961
	20000000	0.0239672	0.0197969	0.0295448
	25000000	0.0215731	0.0176864	0.026146
	30000000	0.0196258	0.0159766	0.0232078
	35000000	0.0181733	0.0150315	0.0217403
	40000000	0.0169696	0.0138402	0.0206053
	50000000	0.0151915	0.0124981	0.0181491
	60000000	0.0138616	0.0115499	0.0164371
	70000000	0.0128405	0.0104199	0.0156924
	80000000	0.0120284	0.00963148	0.0145469
	90000000	0.0113011	0.00922292	0.0134521
	100000000	0.0107215	0.0088655	0.0127913
	120000000	0.00979405	0.00798523	0.0118168
	150000000	0.0087449	0.00704692	0.0103004
	200000000	0.00759402	0.00617471	0.00896649
