# Supplementary material for: A large effective population size for established within-host influenza virus infection
Source: eLife journal article supplement (doi:10.7554/elife.56915), 2020-08-10
Supplement: supp [file elife_poa_e56915_Figure_1_figure_supplement_2.pdf › elife_poa_e56915_Figure_1_figure_supplement_2.pdf]

A

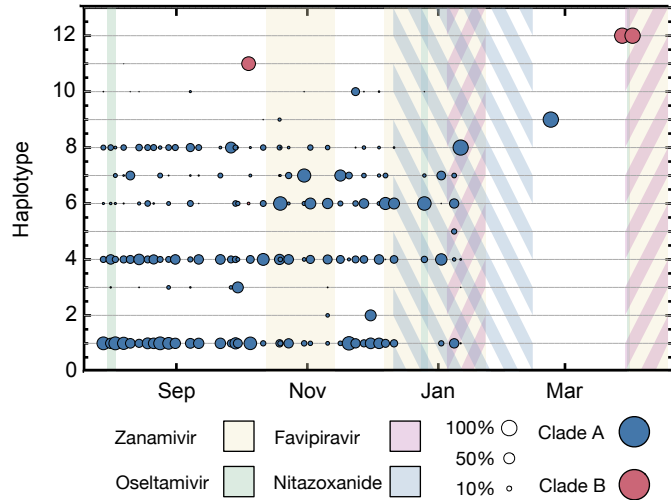

B

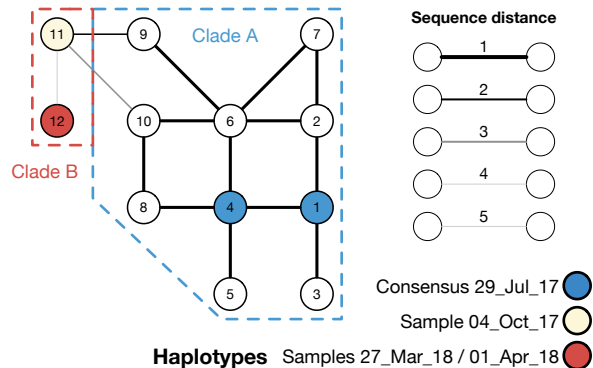

|   |           |   |           |    |           |
|---|-----------|---|-----------|----|-----------|
| 1 | ACCACAAAT | 5 | ACCATAAAC | 9  | ACCACGAGC |
| 2 | ACCACAAGT | 6 | ACCACAAGC | 10 | ACCACAGGC |
| 3 | ACCGCAAAT | 7 | ACCACAAGA | 11 | CCCACGTGC |
| 4 | ACCACAAAC | 8 | ACCACAGAC | 12 | CTTCTGTAC |
