# Supplementary material for: A large effective population size for established within-host influenza virus infection
Source: eLife. 2020 Aug 10;9:e56915. doi: 10.7554/eLife.56915 (PMC7431133; doi:10.7554/eLife.56915)
Supplement: Supplementary file 1. — A generated under different modelling assumptions. [file elife-56915-supp1.xlsx]

## Sheet: Sheet1
	Method	Inferred Ne for clade A
	Default	30000000
	6 hour generation time	80000000
	8 hour generation time	50000000
	12 hour generation time	20000000
	18 hour generation time	9000000
	Don't account for false positive variant calls	40000000
	Don't impose 0.1% frequency cutoff	30000000
