# Supplementary figures and images for: A large effective population size for established within-host influenza virus infection
Source: eLife journal article supplement (doi:10.7554/elife.56915), 2020-08-10

# Neuraminidase codon 117

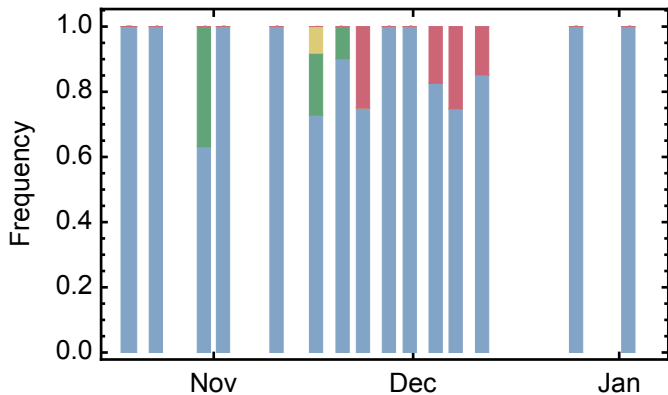

Supplement: supp [file elife_poa_e56915_Figure_2_figure_supplement_1.pdf › elife_poa_e56915_Figure_2_figure_supplement_1.pdf]

**A**

Clade A samples: Pre-favipiravir

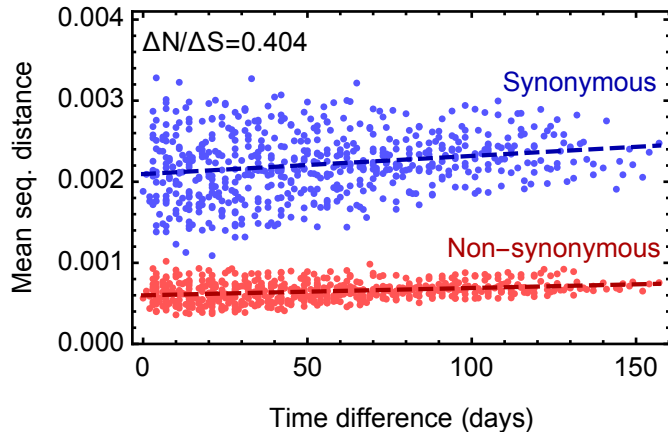**B**

Clade B samples

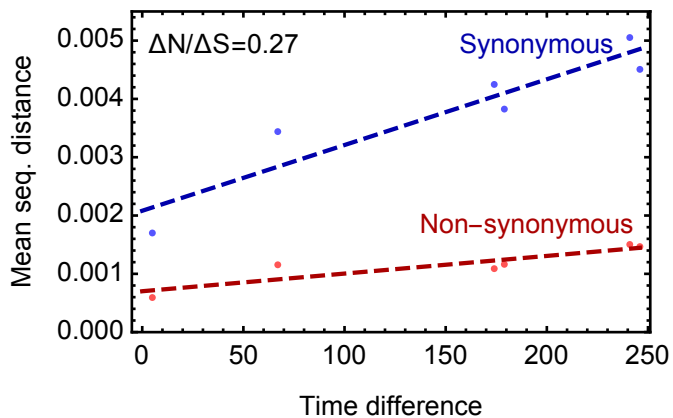

Supplement: supp [file elife_poa_e56915_Figure_2_figure_supplement_2.pdf › elife_poa_e56915_Figure_2_figure_supplement_2.pdf]

Patient W

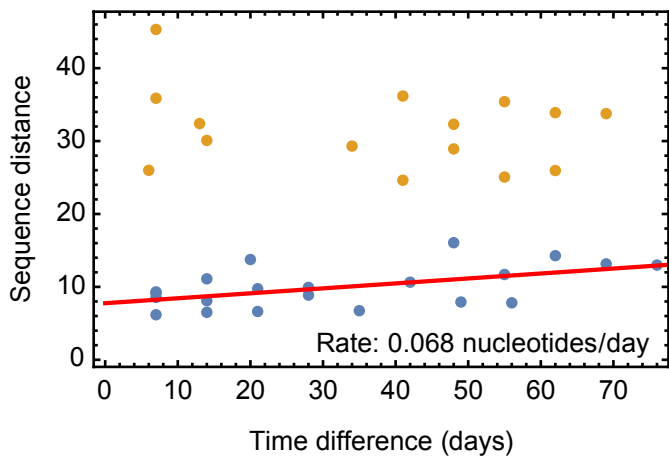

Patient W

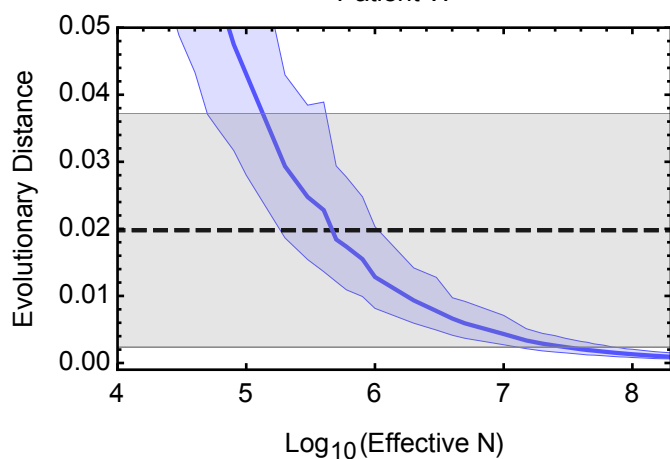

Patient X

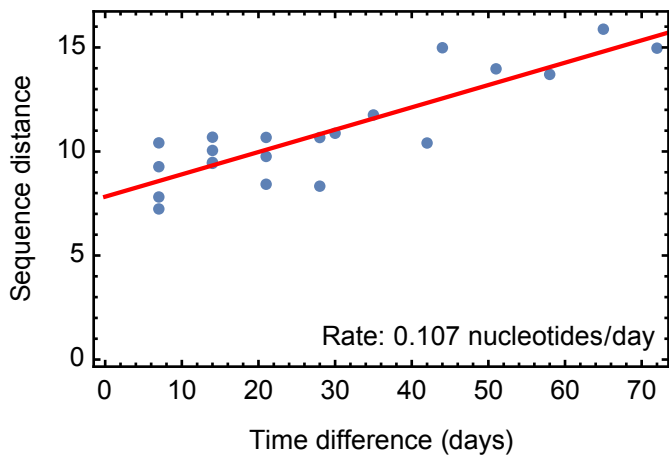

Patient X

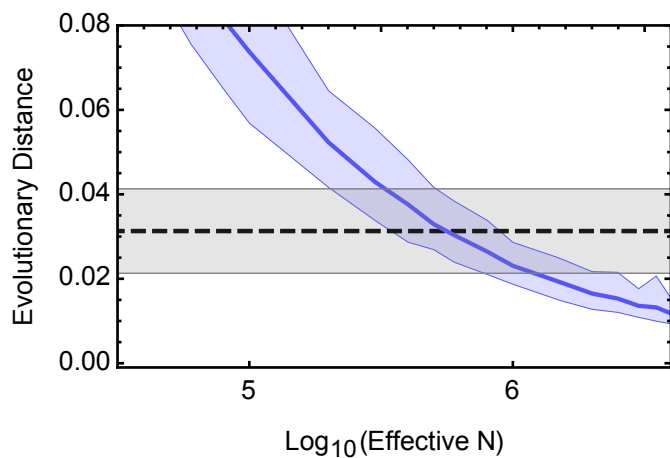

Patient Y

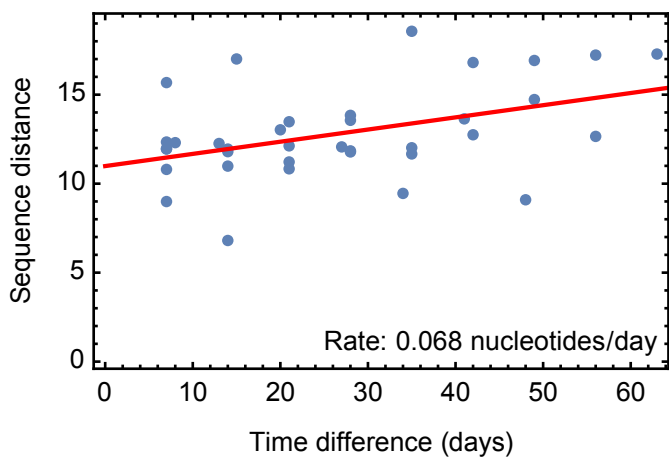

Patient Y

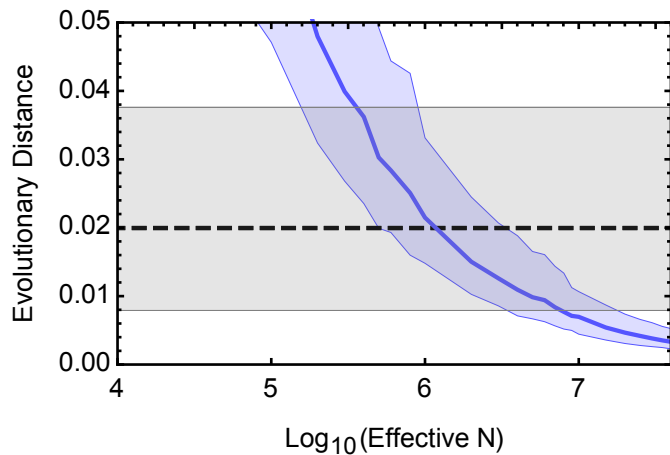

Patient Z

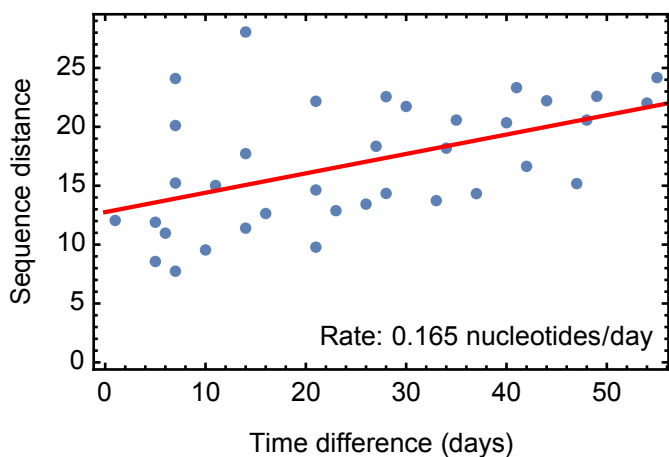

Patient Z

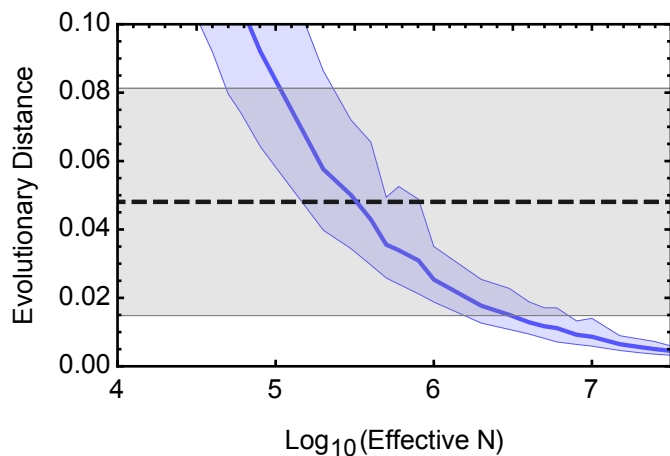

Supplement: supp [file elife_poa_e56915_Figure_2_figure_supplement_3.pdf › elife_poa_e56915_Figure_2_figure_supplement_3.pdf]

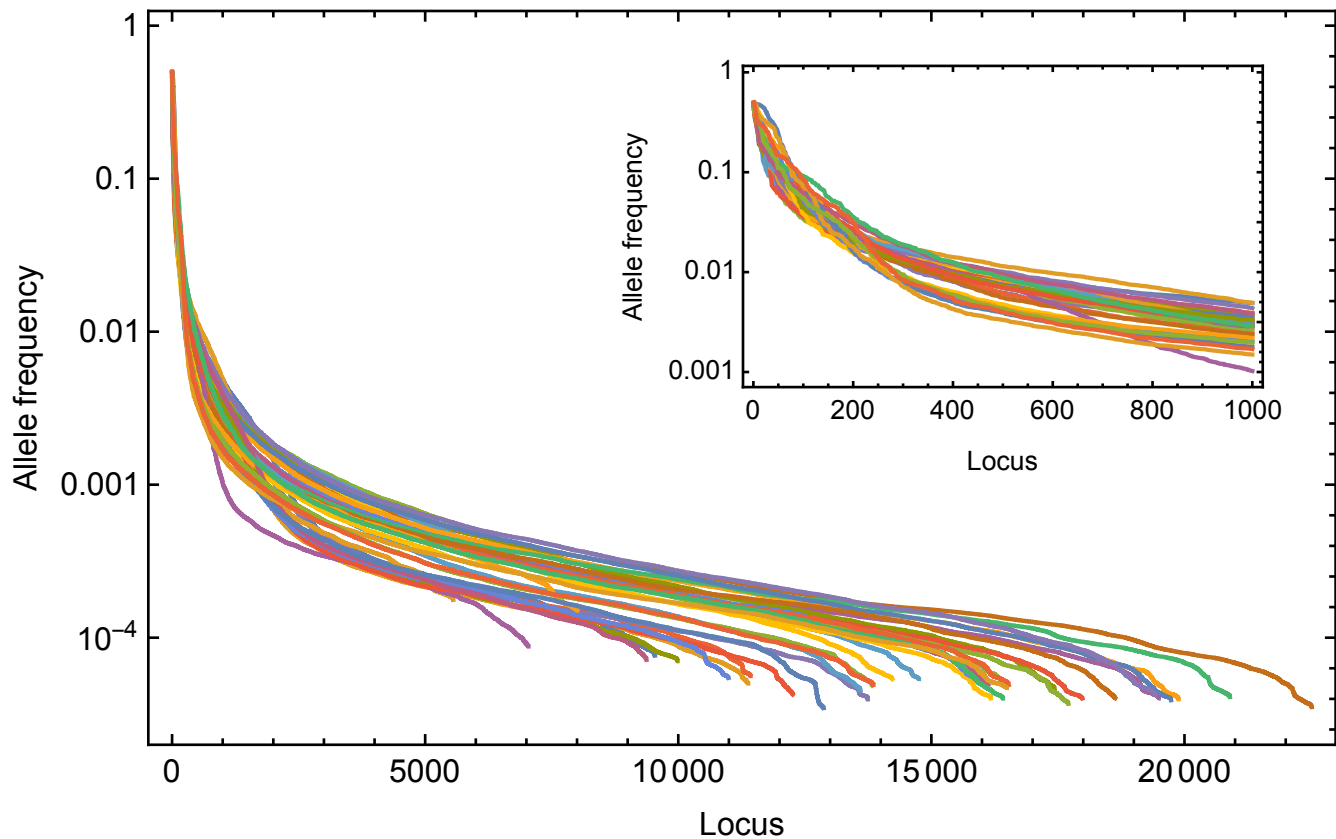

Supplement: supp [file elife_poa_e56915_Figure_2_figure_supplement_4.pdf › elife_poa_e56915_Figure_2_figure_supplement_4.pdf]

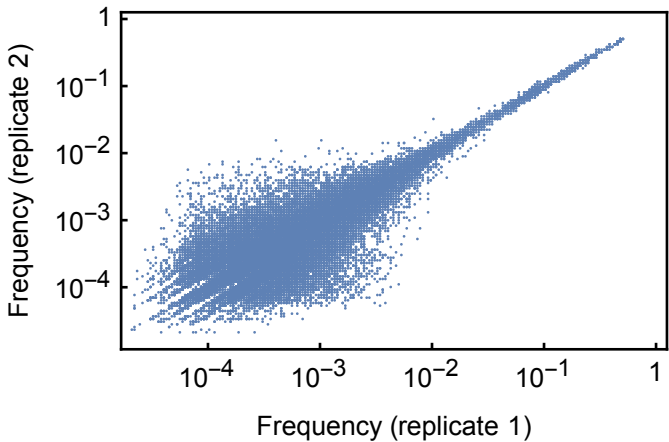

Supplement: supp [file elife_poa_e56915_Figure_2_figure_supplement_5.pdf › elife_poa_e56915_Figure_2_figure_supplement_5.pdf]

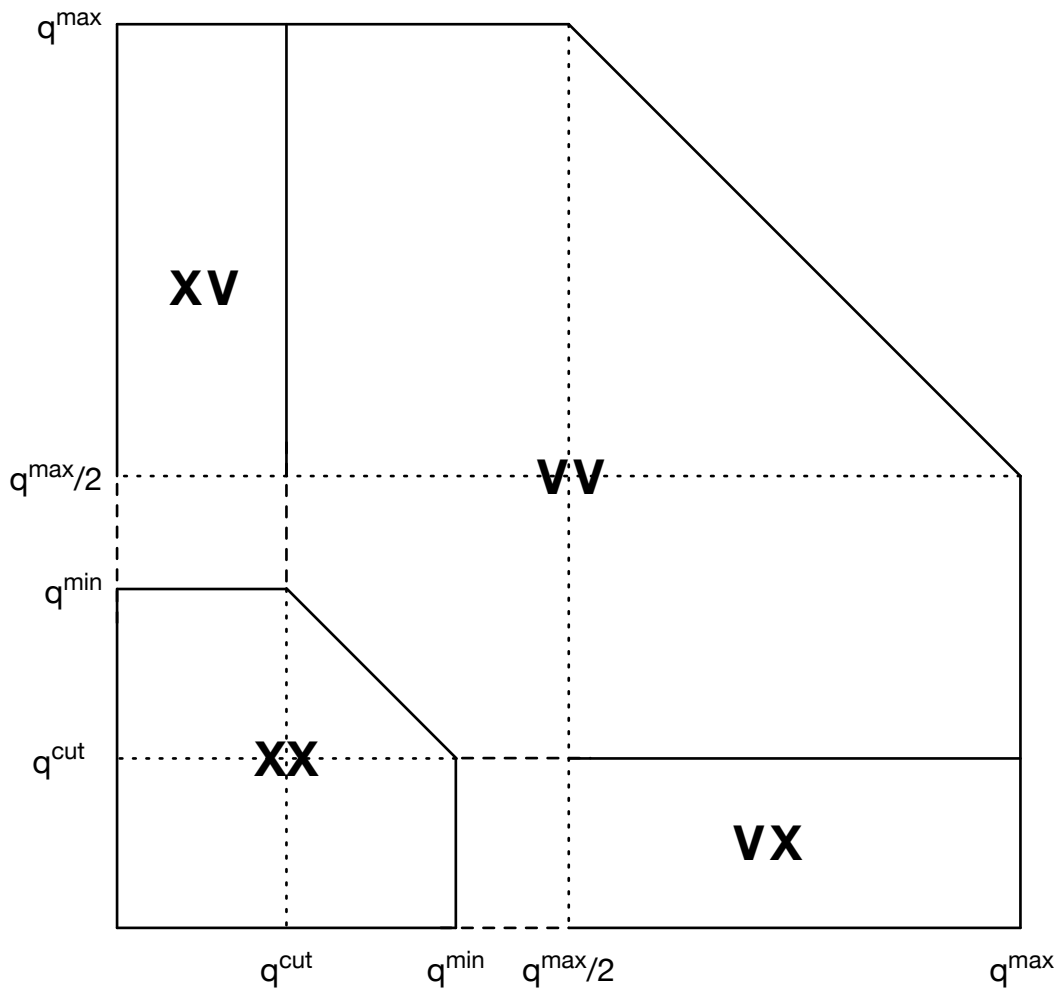

Supplement: supp [file elife_poa_e56915_Figure_2_figure_supplement_6.pdf › elife_poa_e56915_Figure_2_figure_supplement_6.pdf]

HCV01 data

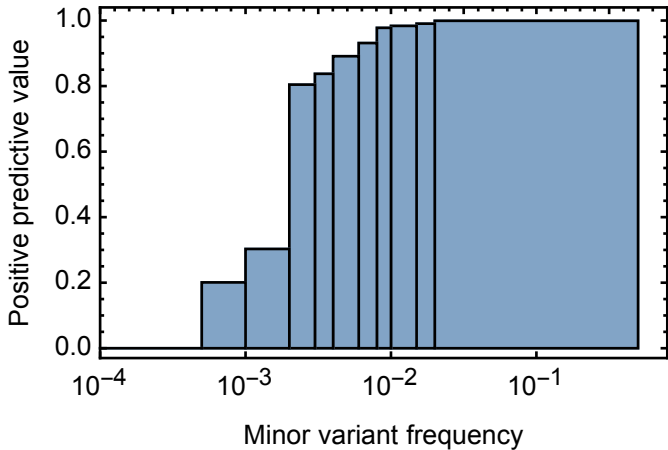

Supplement: supp [file elife_poa_e56915_Figure_2_figure_supplement_7.pdf › elife_poa_e56915_Figure_2_figure_supplement_7.pdf]
